# Supplementary material
Source: PubMed Central journal article supplement (PMC4944760)

## Convergent and Biomimetic Enantioselective Total Synthesis of (-)-Communesin F

Stephen P. Lathrop, Matthew Pompeo, Wen-Tau T. Chang,  
and Mohammad Movassaghi\*

*Massachusetts Institute of Technology, Department of Chemistry, Cambridge, Massachusetts 02139*

### Supporting Information

|                                                         |     |
|---------------------------------------------------------|-----|
| General Procedures                                      | S3  |
| Materials                                               | S3  |
| Instrumentation                                         | S3  |
| Positional Numbering System                             | S4  |
| Tryptamine <b>S1</b>                                    | S5  |
| Bromocyclotryptamine (+)- <b>29</b>                     | S7  |
| Sulfamate Ester (+)- <b>31</b>                          | S9  |
| Bromocyclotryptophan (+)- <b>32</b>                     | S11 |
| Cyclotryptophan (+)- <b>33</b>                          | S13 |
| Cyclotryptamine (+)- <b>28</b>                          | S15 |
| Sulfamate Ester (+)- <b>27</b>                          | S17 |
| Amide (-)- <b>34</b>                                    | S19 |
| Allylic Alcohol (-)- <b>36</b>                          | S21 |
| Oxazoline (-)- <b>37</b>                                | S23 |
| Aminocyclotryptamine (+)- <b>S7</b>                     | S25 |
| Azepine (-)- <b>S8</b>                                  | S27 |
| Indoline (-)- <b>38</b>                                 | S29 |
| Formamide (-)- <b>39</b>                                | S31 |
| <i>N</i> -Methyl Indoline (-)- <b>40</b>                | S33 |
| Hemiaminal (-)- <b>41</b>                               | S35 |
| Tricyclic Amine (+)- <b>24</b>                          | S37 |
| <i>tert</i> -Butylsulfinimine (-)- <b>42</b>            | S39 |
| Allyl Oxindole (+)- <b>43</b>                           | S40 |
| Alcohol (+)- <b>44</b>                                  | S42 |
| Carbamate (+)- <b>45</b>                                | S43 |
| Allylic Alcohol (-)- <b>46</b>                          | S45 |
| Tricyclic Oxindole (-)- <b>47</b>                       | S47 |
| Tricyclic Amine (+)- <b>48</b>                          | S49 |
| Aminonitrile (+)- <b>49</b>                             | S50 |
| Oxazolidinone (+)- <b>S10</b>                           | S52 |
| Tricyclic Amine (+)- <b>24</b>                          | S53 |
| Sulfamide (+)- <b>50</b>                                | S54 |
| Heterodimer (+)- <b>51</b>                              | S56 |
| Heterodimeric Diamine (+)- <b>20</b>                    | S58 |
| <i>N</i> 8'-Benzenesulfonyl Communesin F (-)- <b>53</b> | S60 |
| (-)-Communesin F ( <b>1</b> )                           | S62 |
| NMR Comparison Tables for (-)-Communesin F ( <b>1</b> ) | S64 |

|                                                                                                                |            |
|----------------------------------------------------------------------------------------------------------------|------------|
| <b>In Situ <sup>1</sup>H NMR Monitoring of the Conversion of Diamine (+)-<b>20</b> to Heptacycle <b>52</b></b> | <b>S68</b> |
| <b>Calculations Related to Formation of Heterodimer (+)-<b>51</b></b>                                          | <b>S69</b> |
| <b>X-Ray Diffraction Data for Tricyclic Amine (+)-<b>48</b></b>                                                | <b>S70</b> |
| <b>Copy of <sup>1</sup>H, <sup>13</sup>C, and <sup>19</sup>F NMR spectra, and HPLC traces</b>                  | <b>S76</b> |

**General Procedures.** All reactions were performed in oven-dried or flame-dried round-bottom flasks, unless noted otherwise. The flasks were fitted with rubber septa, and reactions were conducted under a positive pressure of argon. Cannulae or gas-tight syringes with stainless steel needles were used to transfer air- or moisture-sensitive liquids. Where necessary (so noted), solutions were deoxygenated by sparging with argon for a minimum of 10 min. Flash column chromatography was performed as described by Still *et al.*<sup>1</sup> using granular silica gel (60-Å pore size, 40–63 μm, 4–6% H<sub>2</sub>O content, Zeochem). Analytical thin layer chromatography (TLC) was performed using glass plates pre-coated with 0.25 mm 230–400 mesh silica gel impregnated with a fluorescent indicator (254 nm, EMD Millipore 105715). TLC plates were visualized by exposure to short wave ultraviolet light (254 nm) and irreversibly stained by treatment with an aqueous solution of ceric ammonium molybdate (CAM) followed by heating (~ 1 min) on a hot plate (~ 250 °C). Organic solutions were concentrated at 30 °C on rotary evaporators capable of achieving a minimum pressure of ~2 torr. The diazene photolysis was accomplished by irradiation in a Rayonet RMR-200 photochemical reactor (Southern New England Ultraviolet Company, Branford, CT, USA) equipped with 16 lamps.

**Materials.** Commercial reagents and solvents were used as received with the following exceptions: dichloromethane, acetonitrile, tetrahydrofuran, methanol, pyridine, toluene, and triethylamine were purchased from J. T. Baker (Cycletainer™) and were purified by the method of Grubbs *et al.* under positive argon pressure.<sup>2</sup> Benzene was dried by distillation over calcium hydride under an inert nitrogen atmosphere. Chloroform was dried by distillation over potassium carbonate under an inert argon atmosphere. Silver hexafluoroantimonate and scandium(III) trifluoromethanesulfonate were purchased from Strem Chemicals; 2,6-di-*tert*-butyl-4-methylpyridine was purchased from Matrix Scientific and was further purified by flash column chromatography on silica gel (eluent: hexanes); L-tryptophan methyl ester hydrochloride was purchased from Chem-Impex International, Inc.; di-*tert*-butyl dicarbonate (Boc<sub>2</sub>O) and hexafluoroisopropanol (HFIP) were purchased from Oakwood Chemicals, Inc.; tetra-*n*-butylammonium hydrogen sulfate, 2-mercaptopyridine *N*-oxide, and 2-methyl-2-phenylpropionic acid were purchased from TCI America; tryptamine and *N,N,N',N'*-tetramethylchloroformamidinium hexafluorophosphate (TCFH) were purchased from AK Scientific, Inc.; (*S*)-(-)-2-methyl-2-propanesulfinamide was purchased from AllyChem. All other solvents and chemicals were purchased from Sigma–Aldrich.

**Instrumentation.** Proton nuclear magnetic resonance (<sup>1</sup>H NMR) spectra were recorded with a Bruker AVANCE 600 spectrometer, a Varian inverse probe 500 INOVA spectrometer, or a Bruker AVANCE III 400 spectrometer. Chemical shifts are recorded in parts per million on the δ scale and are referenced from the residual protium in the NMR solvent (CHCl<sub>3</sub>: δ 7.24, CDHCl<sub>2</sub>: 5.32, CD<sub>2</sub>H<sub>2</sub>CN: 1.94, CD<sub>3</sub>SOCD<sub>2</sub>H: 2.50, C<sub>6</sub>D<sub>5</sub>H: 7.16). Data are reported as follows: chemical shift [multiplicity (s = singlet, d = doublet, t = triplet, q = quartet, m = multiplet), coupling constant(s) in Hertz, integration, assignment]. Carbon-13 nuclear magnetic resonance (<sup>13</sup>C NMR) spectra were recorded with a Bruker AVANCE 600 spectrometer, a Varian 500 INOVA spectrometer, or a Bruker AVANCE III 400 spectrometer and are recorded in parts per million on the δ scale and are referenced from the carbon resonances of the solvent (CDCl<sub>3</sub>: δ 77.23; CD<sub>2</sub>Cl<sub>2</sub>:

<sup>1</sup> Still, W. C.; Kahn, M.; Mitra, A. *J. Org. Chem.* **1978**, *43*, 2923.

<sup>2</sup> Pangborn, A. B.; Giardello, M. A.; Grubbs, R. H.; Rosen, R. K.; Timmers, F. *Organometallics* **1996**, *15*, 1518.

54.00 CD<sub>3</sub>CN: 118.69, DMSO-*d*<sub>6</sub>: 39.51, C<sub>6</sub>D<sub>6</sub>: 128.39). Data are reported as follows: chemical shift [multiplicity (s = singlet, d = doublet, t = triplet, q = quartet, m = multiplet), coupling constant(s) in Hertz, assignment]. Fluorine-19 nuclear magnetic resonance spectra were recorded with a Varian 300 INOVA spectrometer and are recorded in parts per million on the  $\delta$  scale and are referenced from the fluorine resonances of trifluoroacetic acid (CF<sub>3</sub>CO<sub>2</sub>H  $\delta$  -76.55). Data are reported as follows: chemical shift [multiplicity (s = singlet, d = doublet, t = triplet, q = quartet, m = multiplet), coupling constant(s) in Hertz, integration, assignment]. Infrared data were obtained with a Perkin-Elmer 2000 FTIR and are reported as follows: [frequency of absorption (cm<sup>-1</sup>), intensity of absorption (s = strong, m = medium, w = weak, br = broad), assignment]. Optical rotations were measured on a Jasco-1010 polarimeter with a sodium lamp and are reported as follows:  $[\alpha]_{\lambda}^{T^{\circ}\text{C}}$  (c = g/100 mL, solvent). We thank Dr. Li Li at the Massachusetts Institute of Technology Department of Chemistry Instrumentation Facility for obtaining mass spectroscopic data. High resolution mass spectra (HRMS) were recorded on a Bruker Daltonics APEXIV 4.7 Tesla FT-ICR-MS using electrospray (ESI) (*m/z*) ionization source or direct analysis in real time (DART) ionization source.

**Positional Numbering System.** In assigning the <sup>1</sup>H and <sup>13</sup>C NMR data of all intermediates en route to (-)-communesin F, we have employed a uniform numbering system.

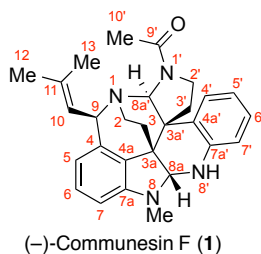

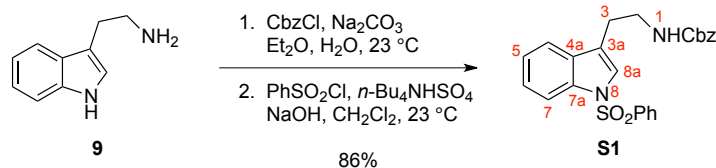

### **Tryptamine S1:**

Benzyl chloroformate (926  $\mu$ L, 6.49 mmol, 1.04 equiv) was added via syringe to a mixture of tryptamine (1.00 g, 6.24 mmol, 1 equiv) and sodium carbonate (661 mg, 6.24 mmol, 1 equiv) partitioned between diethyl ether (31 mL) and deionized water (31 mL) at 23 °C under an air atmosphere. After vigorous stirring for 40 min, the layers were separated and the aqueous layer was extracted with diethyl ether ( $3 \times 20$  mL). The combined organic extracts were washed successively with an aqueous hydrochloric acid solution (1 N, 30 mL) and a saturated aqueous sodium chloride solution (30 mL), were dried over anhydrous sodium sulfate, were filtered, and were concentrated under reduced pressure to yield crude benzyl (2-(1*H*-indol-3-yl)ethyl)carbamate which was used directly in the next step without further purification.

Benzenesulfonyl chloride (1.00 mL, 7.80 mmol, 1.25 equiv) was added via syringe to a suspension of crude (2-(1*H*-indol-3-yl)ethyl)carbamate, freshly crushed sodium hydroxide (748 mg, 18.7 mmol, 3.00 equiv), and tetra-*n*-butylammonium hydrogen sulfate (212 mg, 0.624 mmol, 0.100 equiv) in dichloromethane (25 mL) at 23 °C under an air atmosphere. After 2.5 h, the yellow suspension was cooled in a 0 °C ice bath and was acidified by portionwise addition of an aqueous hydrogen chloride solution (1 N, 25 mL) over 2 min. After warming to 23 °C, the layers were separated and the aqueous phase was extracted with dichloromethane ( $2 \times 20$  mL). The combined organic extracts were washed successively with water ( $2 \times 40$  mL) and a saturated aqueous sodium chloride solution (40 mL), were dried over anhydrous sodium sulfate, were filtered, and were concentrated under reduced pressure. The resulting residue was purified by flash column chromatography on silica gel (eluent: 25%  $\rightarrow$  30% ethyl acetate in hexanes) to afford tryptamine **S1** (2.33 g, 85.8%) as a colorless, highly viscous syrup. Structural assignments were made using additional information from gCOSY, HSQC, and HMBC experiments.

<sup>1</sup>H NMR (400 MHz, CDCl<sub>3</sub>, 25 °C):

$\delta$  8.00 (d,  $J = 8.3$  Hz, 1H, C<sub>7</sub>H), 7.89–7.78 (m, 2H, N<sub>8</sub>SO<sub>2</sub>Ph-*o*-H), 7.50 (d,  $J = 7.4$  Hz, 1H, C<sub>4</sub>H), 7.44 (d,  $J = 7.4$  Hz, 1H, N<sub>8</sub>SO<sub>2</sub>Ph-*p*-H), 7.41–7.27 (m, 9H, C<sub>6</sub>H, C<sub>8a</sub>H, N<sub>1</sub>CO<sub>2</sub>CH<sub>2</sub>Ph-*o*-H, N<sub>1</sub>CO<sub>2</sub>CH<sub>2</sub>Ph-*m*-H, N<sub>1</sub>CO<sub>2</sub>CH<sub>2</sub>Ph-*p*-H, N<sub>8</sub>SO<sub>2</sub>Ph-*m*-H), 7.21 (t,  $J = 7.8$  Hz, 1H, C<sub>5</sub>H), 5.10 (s, 2H, N<sub>1</sub>CO<sub>2</sub>CH<sub>2</sub>Ph), 5.02–4.86 (m, 1H, HN<sub>1</sub>CO<sub>2</sub>CH<sub>2</sub>Ph), 3.46 (app-q,  $J = 6.3$  Hz, 2H, C<sub>2</sub>H), 2.87 (t,  $J = 6.8$  Hz, 2H, C<sub>3</sub>H).

<sup>13</sup>C NMR (100 MHz, CDCl<sub>3</sub>, 25 °C):

$\delta$  156.5 (N<sub>1</sub>CO<sub>2</sub>CH<sub>2</sub>Ph), 138.1 (N<sub>8</sub>SO<sub>2</sub>Ph-*ipso*-C), 136.6 (N<sub>1</sub>CO<sub>2</sub>CH<sub>2</sub>Ph-*ipso*-C), 135.5 (C<sub>7a</sub>), 133.9 (N<sub>8</sub>SO<sub>2</sub>Ph-*p*-C), 130.8 (C<sub>4a</sub>), 129.3 (N<sub>8</sub>SO<sub>2</sub>Ph-*m*-C), 128.7 (N<sub>1</sub>CO<sub>2</sub>CH<sub>2</sub>Ph-*m*-C), 128.3 (N<sub>1</sub>CO<sub>2</sub>CH<sub>2</sub>Ph-*p*-C), 128.2 (N<sub>1</sub>CO<sub>2</sub>CH<sub>2</sub>Ph-*o*-C), 126.8 (N<sub>8</sub>SO<sub>2</sub>Ph-*o*-C), 125.1 (C<sub>6</sub>), 123.6 (C<sub>8a</sub>), 123.4 (C<sub>5</sub>), 120.1 (C<sub>3a</sub>), 119.6 (C<sub>4</sub>), 113.9 (C<sub>7</sub>), 66.8 (N<sub>1</sub>CO<sub>2</sub>CH<sub>2</sub>Ph), 40.5 (C<sub>2</sub>), 25.6 (C<sub>3</sub>).

FTIR (thin film)  $\text{cm}^{-1}$ : 3415 (s), 3333 (s), 1720 (m), 1525 (m), 1175 (s).  
HRMS (DART) ( $m/z$ ): calc'd for  $\text{C}_{24}\text{H}_{22}\text{BrN}_2\text{O}_4\text{S}$   $[\text{M}+\text{H}]^+$ : 513.0478,  
found: 513.0486.  
TLC (25% ethyl acetate in hexanes),  $R_f$ : 0.21 (UV, CAM).



|                                             |                                                                                                                               |
|---------------------------------------------|-------------------------------------------------------------------------------------------------------------------------------|
| FTIR (thin film) $\text{cm}^{-1}$ :         | 3065 (s), 2956 (s), 1701 (m), 1601 (s), 1457 (br-m).                                                                          |
| HRMS (DART) ( $m/z$ ):                      | calc'd for $\text{C}_{24}\text{H}_{22}\text{BrN}_2\text{O}_4\text{S}$ $[\text{M}+\text{H}]^+$ : 513.0478,<br>found: 513.0486. |
| $[\alpha]_{\text{D}}^{24}$ :                | +157 ( $c = 0.60$ , $\text{CH}_2\text{Cl}_2$ ).                                                                               |
| TLC (20% ethyl acetate in hexanes), $R_f$ : | 0.22 (UV, CAM).                                                                                                               |



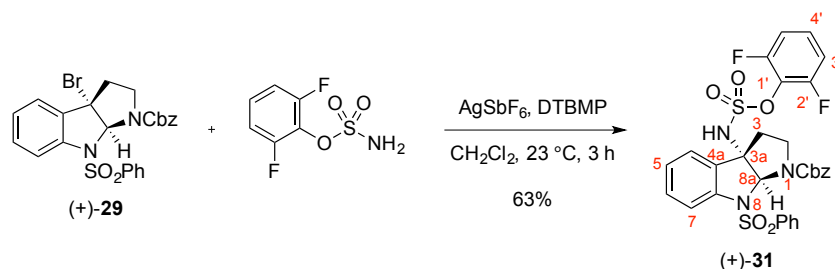

### Sulfamate ester (+)-**31**:

A sample of silver hexafluoroantimonate (772 mg, 2.25 mmol, 2.00 equiv) was added to a solution of bromocyclotryptamine (+)-**29** (577 mg, 1.12 mmol, 1 equiv), 2,6-difluorophenyl sulfamate<sup>5</sup> (470 mg, 2.25 mmol, 2.00 equiv), and 2,6-di-*tert*-butyl-4-methylpyridine (DTBMP, 592 mg, 2.88 mmol, 2.57 equiv) in dichloromethane (28 mL) at 23 °C in the dark. After 3 h, the off-white suspension was diluted with ethyl acetate (45 mL) and was filtered through a 2.2 cm pad of silica gel covered with a 1.2 cm pad of Celite in a 60 mL medium-porosity fritted glass funnel. The beige filter cake was washed with ethyl acetate (285 mL) and the filtrate was concentrated under reduced pressure. The resulting residue was purified by flash column chromatography on silica gel (eluent: 35%→38% ethyl acetate in hexanes) to afford sulfamate ester (+)-**31** (453 mg, 62.8%) as a white foam.

As a result of the slow conformational equilibration at ambient temperature, NMR spectra were collected at elevated temperature. Structural assignments were made using additional information from gCOSY, HSQC, and HMBC experiments also collected at elevated temperature.

<sup>1</sup>H NMR (400 MHz, CD<sub>3</sub>CN, 60 °C): δ 7.80 (d, 2H, *J* = 7.6 Hz, N<sub>8</sub>SO<sub>2</sub>Ph-*o*-H), 7.62 (app-d, *J* = 8.1, 1H, C<sub>7</sub>H), 7.55 (tt, *J* = 7.1, 1.3 Hz, 1H, N<sub>8</sub>SO<sub>2</sub>Ph-*p*-H), 7.47–7.28 (m, 10H, C<sub>4</sub>H, C<sub>6</sub>H, C<sub>4</sub>'H, N<sub>1</sub>CO<sub>2</sub>CH<sub>2</sub>Ph-*o*-H, N<sub>1</sub>CO<sub>2</sub>CH<sub>2</sub>Ph-*m*-H, N<sub>1</sub>CO<sub>2</sub>CH<sub>2</sub>Ph-*p*-H, N<sub>8</sub>SO<sub>2</sub>Ph-*m*-H), 7.20 (td, *J* = 7.6, 0.9 Hz, 1H, C<sub>5</sub>H), 7.14–7.05 (m, 2H, C<sub>3</sub>H), 6.58 (s, 2H, C<sub>8a</sub>H, NHSO<sub>3</sub>Ar), 5.21 (d, *J* = 12.4 Hz, 1H, N<sub>1</sub>CO<sub>2</sub>CH<sub>a</sub>Ph), 5.10 (d, *J* = 12.4 Hz, 1H, N<sub>1</sub>CO<sub>2</sub>CH<sub>b</sub>Ph), 4.03–3.94 (m, 1H, C<sub>2</sub>H<sub>a</sub>), 2.90–2.71 (m, 2H, C<sub>2</sub>H<sub>b</sub>, C<sub>3</sub>H<sub>a</sub>), 2.46–2.33 (m, 1H, C<sub>3</sub>H<sub>b</sub>).

<sup>13</sup>C NMR (100 MHz, CD<sub>3</sub>CN, 60 °C): δ 155.8 (N<sub>1</sub>CO<sub>2</sub>CH<sub>2</sub>Ph), 157.7 (dd, *J* = 252.0, 3.5 Hz, C<sub>2</sub>), 143.9 (C<sub>7a</sub>), 140.5 (N<sub>8</sub>SO<sub>2</sub>Ph-*ipso*-C), 138.6 (N<sub>1</sub>CO<sub>2</sub>CH<sub>2</sub>Ph-*ipso*-C), 135.2 (N<sub>8</sub>SO<sub>2</sub>Ph-*p*-C), 132.6 (C<sub>6</sub>), 131.9 (C<sub>4a</sub>), 130.9 (N<sub>8</sub>SO<sub>2</sub>Ph-*m*-C), 130.1 (N<sub>1</sub>CO<sub>2</sub>CH<sub>2</sub>Ph-*m*-C), 130.0 (t, *J* = 9.5 Hz, C<sub>4</sub>'), 129.8 (N<sub>1</sub>CO<sub>2</sub>CH<sub>2</sub>Ph-*p*-C), 129.7 (N<sub>1</sub>CO<sub>2</sub>CH<sub>2</sub>Ph-*o*-C), 128.9 (N<sub>8</sub>SO<sub>2</sub>Ph-*o*-C), 128.2 (t, *J* = 15.8 Hz, C<sub>1</sub>'), 126.9 (C<sub>4</sub>), 126.7 (C<sub>5</sub>), 117.7 (C<sub>7</sub>),

<sup>5</sup> Roizen, J. L.; Zalatan, D. L.; Du Bois, J. *Angew. Chem. Int. Ed.* **2013**, *52*, 11343.

114.6–114.3 (m, C<sub>3'</sub>), 84.9 (C<sub>8a</sub>), 74.7 (C<sub>3a</sub>), 69.0 (N<sub>1</sub>CO<sub>2</sub>CH<sub>2</sub>Ph), 46.6 (C<sub>2</sub>), 38.1 (C<sub>3</sub>).

<sup>19</sup>F NMR (282 MHz, CD<sub>3</sub>CN, 20 °C): δ -125.3 (s, C<sub>6</sub>H<sub>3</sub>F<sub>2</sub>).

FTIR (thin film) cm<sup>-1</sup>: 3179 (br-s), 2895 (s), 1685 (m), 1605 (s), 1175 (s).

HRMS (ESI) (*m/z*): calc'd for C<sub>30</sub>H<sub>25</sub>F<sub>2</sub>KN<sub>3</sub>O<sub>7</sub>S<sub>2</sub> [M+K]<sup>+</sup>: 680.0734, found: 680.0735.

[α]<sub>D</sub><sup>24</sup>: +39 (*c* = 1.42, CH<sub>2</sub>Cl<sub>2</sub>).

TLC (35% ethyl acetate in hexanes), R<sub>f</sub>: 0.21 (UV, CAM).

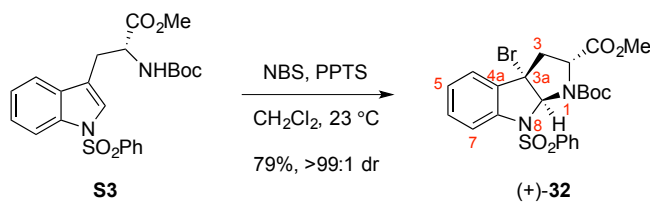

### **Bromocyclotryptophan (+)-32:**

A sample of *N*-bromosuccinimide (4.04 g, 22.7 mmol, 1.05 equiv) was added to a solution of tryptophan derivative **S3**<sup>6</sup> (9.90 g, 21.6 mmol, 1 equiv) and pyridinium *p*-toluenesulfonate (5.70 g, 22.7 mmol, 1.05 equiv) in dichloromethane (216 mL) at 23 °C. After 1.5 h, the homogeneous yellow reaction mixture was washed sequentially with a saturated aqueous sodium bicarbonate solution (100 mL) followed by a saturated aqueous sodium thiosulfate solution (100 mL), and finally saturated aqueous sodium chloride solution (100 mL). The organic layer was dried over anhydrous sodium sulfate, was filtered, and was concentrated under reduced pressure. The resulting residue was purified by flash column chromatography on silica gel (eluent: 50% diethyl ether in hexanes) to afford bromocyclotryptophan (+)-**32** (11.6 g, 99.6%, 17.5:1 dr) as a white foam. The diastereomeric ratio was further enriched by recrystallization from 27% ethyl acetate in hexanes to yield bromocyclotryptophan (+)-**32** (9.13 g over two batches, 78.7%, >99:1 dr) as colorless plates.

As a result of the slow conformational equilibration at ambient temperature, NMR spectra were collected at elevated temperature. Structural assignments were made using additional information from gCOSY, HSQC, and HMBC experiments also collected at elevated temperature.

<sup>1</sup>H NMR (500 MHz, CD<sub>3</sub>CN, 60 °C): δ 7.92 (d, *J* = 7.6 Hz, 2H, N<sub>8</sub>SO<sub>2</sub>Ph-*o*-H), 7.57 (t, *J* = 7.5 Hz, 1H, N<sub>8</sub>SO<sub>2</sub>Ph-*p*-H), 7.45 (m, 4H, C<sub>7</sub>H, C<sub>4</sub>H, N<sub>8</sub>SO<sub>2</sub>Ph-*m*-H), 7.39 (app-td, *J* = 7.9, 1.2 Hz, 1H, C<sub>6</sub>H), 7.23 (app-td, *J* = 7.5, 0.8 Hz, 1H, C<sub>5</sub>H), 6.30 (s, 1H, C<sub>8a</sub>H), 3.83 (dd, *J* = 9.8, 6.5 Hz, 1H, C<sub>2</sub>H), 3.72 (s, 3H, CO<sub>2</sub>CH<sub>3</sub>), 3.26 (dd, *J* = 13.1, 6.5 Hz, 1H, C<sub>3</sub>H<sub>a</sub>), 2.75 (dd, *J* = 13.1, 9.8 Hz, 1H, C<sub>3</sub>H<sub>b</sub>), 1.44 (s, 9H, N<sub>1</sub>CO<sub>2</sub>C(CH<sub>3</sub>)<sub>3</sub>).

<sup>13</sup>C NMR (125.8 MHz, CD<sub>3</sub>CN, 60 °C): δ 172.7 (CO<sub>2</sub>CH<sub>3</sub>), 153.8 (N<sub>1</sub>CO<sub>2</sub>C(CH<sub>3</sub>)<sub>3</sub>), 141.9 (C<sub>7a</sub>), 140.7 (N<sub>8</sub>SO<sub>2</sub>Ph-*ipso*-C), 136.1 (C<sub>4a</sub>), 135.4 (N<sub>8</sub>SO<sub>2</sub>Ph-*p*-C), 132.7 (C<sub>6</sub>), 130.6 (N<sub>8</sub>SO<sub>2</sub>Ph-*m*-C), 130.0 (N<sub>8</sub>SO<sub>2</sub>Ph-*o*-C), 128.1 (C<sub>5</sub>), 126.2 (C<sub>4</sub>), 119.8 (C<sub>7</sub>), 88.9 (C<sub>8a</sub>), 83.7 (N<sub>1</sub>CO<sub>2</sub>C(CH<sub>3</sub>)<sub>3</sub>), 61.5 (C<sub>3a</sub>), 61.3 (C<sub>2</sub>), 53.7 (CO<sub>2</sub>CH<sub>3</sub>), 44.6 (C<sub>3</sub>), 29.2 (N<sub>1</sub>CO<sub>2</sub>C(CH<sub>3</sub>)<sub>3</sub>).

FTIR (thin film) cm<sup>-1</sup>: 2980 (m), 1752 (s), 1700 (s), 1600 (w), 1367 (m)

<sup>6</sup> López, C. S.; Pérez-Baldo, C.; Rodríguez-Graña, P.; de Lera, Á. R. *Org. Lett.* **2008**, *10*, 77.

HRMS (ESI) ( $m/z$ ): calc'd for  $C_{23}H_{26}BrN_2O_6S [M+H]^+$ : 537.0689,  
found: 537.0701.

$[\alpha]_D^{24}$ : +191 ( $c = 0.75$ ,  $CH_2Cl_2$ ).

TLC (33% acetone in hexanes),  $R_f$ : 0.34 (UV, CAM).

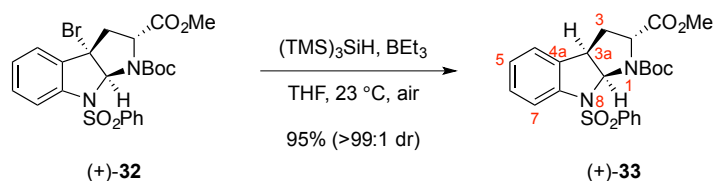

### **Cyclotryptophan (+)-33:**

Triethylborane (1.0 M in THF, 1.7 mL, 1.7 mmol, 0.10 equiv) was added via syringe to a solution of bromocyclotryptophan (+)-**32** (9.01 g, 16.7 mmol, 1 equiv) and tris(trimethylsilyl)silane (15.5 mL, 50.1 mmol, 3.00 equiv) in tetrahydrofuran (129 mL) at 23 °C under an air atmosphere. After 10 min, the homogeneous colorless solution was diluted with a saturated aqueous sodium bicarbonate solution (130 mL). After vigorous stirring for 10 min, the heterogeneous biphasic mixture was diluted with deionized water (100 mL) then extracted with dichloromethane (3 × 200 mL). The combined organic extracts were dried over anhydrous sodium sulfate, were filtered, and were concentrated under reduced pressure to yield a colorless semi-solid suspended in a colorless oil. The colorless oil was decanted and the remaining residue was purified via flash chromatography on silica gel (eluent: 25%→32% ethyl acetate in hexanes) to afford cyclotryptophan (+)-**33** (7.27 g, 94.9%, >99:1 dr) as a white foam.

As a result of the slow conformational equilibration at ambient temperature, NMR spectra were collected at elevated temperature. Structural assignments were made using additional information from gCOSY, HSQC, and HMBC experiments also collected at elevated temperature.

$^1\text{H}$  NMR (500 MHz,  $\text{CD}_3\text{CN}$ , 60 °C):  $\delta$  7.70 (d,  $J = 7.5$  Hz, 2H,  $\text{N}_8\text{SO}_2\text{Ph-}o\text{-H}$ ), 7.55 (app-t,  $J = 7.5$  Hz, 1H,  $\text{N}_8\text{SO}_2\text{Ph-}p\text{-H}$ ), 7.50 (d,  $J = 8.1$  Hz, 1H,  $\text{C}_7\text{H}$ ), 7.41 (app-t,  $J = 7.6$  Hz, 2H,  $\text{N}_8\text{SO}_2\text{Ph-}m\text{-H}$ ), 7.30–7.25 (m, 1H,  $\text{C}_6\text{H}$ ), 7.14–7.10 (m, 2H,  $\text{C}_4\text{H}$ ,  $\text{C}_5\text{H}$ ), 6.22 (d,  $J = 5.9$  Hz, 1H,  $\text{C}_{8a}\text{H}$ ), 3.89–3.83 (m, 1H,  $\text{C}_{3a}\text{H}$ ), 3.69 (s, 3H,  $\text{CO}_2\text{CH}_3$ ), 3.57–3.52 (m, 1H,  $\text{C}_2\text{H}$ ), 2.37 (ddd,  $J = 13.1, 7.2, 2.9$  Hz, 1H,  $\text{C}_3\text{H}_a$ ), 2.21 (dt,  $J = 13.1, 8.0$  Hz, 1H,  $\text{C}_3\text{H}_b$ ), 1.47 (s, 9H,  $\text{N}_1\text{CO}_2\text{C}(\text{CH}_3)_3$ ).

$^{13}\text{C}$  NMR (125.8 MHz,  $\text{CD}_3\text{CN}$ , 60 °C):  $\delta$  174.3 ( $\text{CO}_2\text{CH}_3$ ), 154.8 ( $\text{N}_1\text{CO}_2\text{C}(\text{CH}_3)_3$ ), 142.8 ( $\text{C}_{7a}$ ), 140.0 ( $\text{N}_8\text{SO}_2\text{Ph-}ipso\text{-C}$ ), 136.3 ( $\text{C}_{4a}$ ), 135.0 ( $\text{N}_8\text{SO}_2\text{Ph-}p\text{-C}$ ), 130.6 ( $\text{N}_8\text{SO}_2\text{Ph-}m\text{-C}$ ), 130.3 ( $\text{C}_6$ ), 129.1 ( $\text{N}_8\text{SO}_2\text{Ph-}o\text{-C}$ ), 127.6 ( $\text{C}_5$ ), 126.1 ( $\text{C}_4$ ), 120.2 ( $\text{C}_7$ ), 83.1 ( $\text{C}_{8a}$ ), 82.8 ( $\text{N}_1\text{CO}_2\text{C}(\text{CH}_3)_3$ ), 61.0 ( $\text{C}_{3a}$ ), 53.4 ( $\text{CO}_2\text{CH}_3$ ), 46.8 ( $\text{C}_2$ ), 35.1 ( $\text{C}_3$ ), 29.3 ( $\text{N}_1\text{CO}_2\text{C}(\text{CH}_3)_3$ ).

FTIR (thin film)  $\text{cm}^{-1}$ : 2979 (w), 1750 (s), 1719 (s), 1697 (s), 1366 (m).

HRMS (ESI) ( $m/z$ ): calc'd for  $\text{C}_{23}\text{H}_{27}\text{N}_2\text{O}_6\text{S} [\text{M}+\text{H}]^+$ : 459.1584, found: 459.1603.

$[\alpha]_D^{24}$ : +168 ( $c = 0.77$ ,  $\text{CH}_2\text{Cl}_2$ ).

TLC (33% acetone in hexanes),  $R_f$ : 0.26 (UV, CAM).

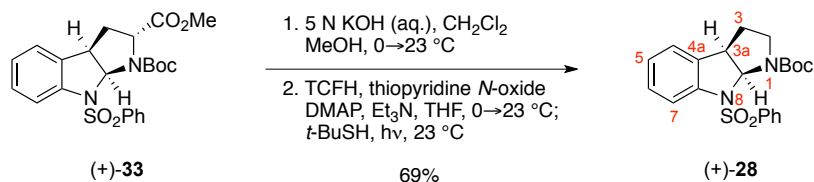

### Cyclotryptamine (+)-**28**:

An aqueous sodium hydroxide solution (5 N, 79.0 mL, 395 mmol, 25.0 equiv) was added in portions over 5 min to a solution of cyclotryptophan (+)-**33** (7.25 g, 15.7 mmol, 1 equiv) in methanol (240 mL) and dichloromethane (31 mL) cooled to 0 °C in an ice bath under an air atmosphere. After 5 min, the ice bath was removed and the milky white solution was allowed to stir at 23 °C. After 7 h, the reaction mixture was cooled to 0 °C in an ice bath and acidified to pH ~ 3 by the portionwise addition of an aqueous hydrochloric acid solution (12 N, 34 mL) over 10 min. The resulting white suspension was allowed to warm to 23 °C and was then concentrated under reduced pressure to remove methanol. The white suspension was then diluted with deionized water (100 mL) and extracted with dichloromethane (3 × 200 mL). The combined organic extracts were washed with a saturated aqueous sodium chloride solution (100 mL), were dried over anhydrous sodium sulfate, were filtered, and were concentrated under reduced pressure to afford the crude carboxylic acid (8.0 g, >99%) as a white foam, which was used directly in the next step after azeotropic drying by concentration from toluene (HPLC grade, 3 × 100 mL).

Samples of 2-mercaptopyridine *N*-oxide (3.20 g, 25.2 mmol, 1.60 equiv), 4-(dimethylamino)pyridine (192 mg, 1.57 mmol, 0.100 equiv), and *N,N,N',N'*-tetramethylchloroformamidinium hexafluorophosphate (TCFH, 6.62 g, 23.6 mmol, 1.50 equiv) were added sequentially to a solution of the crude carboxylic acid in tetrahydrofuran (157 mL) cooled to 0 °C in an ice bath. The reaction flask was subsequently removed from the ice bath, covered in aluminum foil, and charged with triethylamine (8.80 mL, 63.0 mmol, 4.00 equiv) in a slow stream over 30 s while the reaction mixture was still cold. After 2.75 h, *tert*-butyl mercaptan (8.90 mL, 78.7 mmol, 5.00 equiv) was added via syringe. The aluminum foil was then removed from the flask and the resulting green suspension was irradiated with a flood lamp (500 W). To maintain an internal temperature of 23 °C, the flask was immersed in a 20 °C water bath. After 2 h, the lamp was shut off and a saturated aqueous sodium bicarbonate–water solution (1:1, 400 mL) was added. The aqueous layer was extracted with dichloromethane (3 × 200 mL). The combined organic extracts were washed with a saturated aqueous sodium chloride solution (150 mL), were dried over anhydrous sodium sulfate, were filtered, and were concentrated under reduced pressure. The resulting residue was purified by flash column chromatography on silica gel (eluent: 20→25% acetone in hexanes) to afford cyclotryptamine (+)-**28** (4.35 g, 69.0% overall from (+)-**33**) as a white foam.

As a result of the slow conformational equilibration at ambient temperature, NMR spectra were collected at elevated temperature. Structural assignments were made using additional information from gCOSY, HSQC, and HMBC experiments also collected at elevated temperature.

<sup>1</sup>H NMR (500 MHz, CD<sub>3</sub>CN, 60 °C): δ 7.66 (d, *J* = 5.3 Hz, 2H, N<sub>8</sub>SO<sub>2</sub>Ph-*o*-H), 7.56 (t, *J* = 7.5 Hz, 1H, N<sub>8</sub>SO<sub>2</sub>Ph-*p*-H), 7.47 (d, *J* = 8.2 Hz, 1H, C<sub>7</sub>H), 7.41 (t, *J* = 7.9 Hz, 2H, N<sub>8</sub>SO<sub>2</sub>Ph-*m*-H),

7.26–7.22 (m, 1H, C<sub>6</sub>H), 7.14–7.09 (m, 2H, C<sub>4</sub>H, C<sub>5</sub>H), 6.22 (d,  $J = 6.5$  Hz, 1H, C<sub>8a</sub>H), 3.67 (dd,  $J = 11.0, 7.9$  Hz, 1H, C<sub>2</sub>H<sub>a</sub>), 3.59 (t,  $J = 6.9$  Hz, 1H, C<sub>3a</sub>H), 2.62 (dt,  $J = 16.1, 8.2$  Hz, 1H, C<sub>2</sub>H<sub>b</sub>), 2.06 (tt,  $J = 12.0, 7.7$  Hz, 1H, C<sub>3</sub>H<sub>a</sub>), 1.94 (dd,  $J = 12.7, 5.3$  Hz, 1H, C<sub>3</sub>H<sub>b</sub>), 1.49 (s, 9H, N<sub>1</sub>CO<sub>2</sub>C(CH<sub>3</sub>)<sub>3</sub>).

<sup>13</sup>C NMR (125.8 MHz, CD<sub>3</sub>CN, 60 °C):  $\delta$  154.8 (N<sub>1</sub>CO<sub>2</sub>C(CH<sub>3</sub>)<sub>3</sub>), 143.1 (C<sub>7a</sub>), 139.6 (N<sub>8</sub>SO<sub>2</sub>Ph-*ipso*-C), 136.0 (C<sub>4a</sub>), 134.6 (N<sub>8</sub>SO<sub>2</sub>Ph-*p*-C), 130.4 (N<sub>8</sub>SO<sub>2</sub>Ph-*m*-C), 129.6 (C<sub>6</sub>), 128.5 (N<sub>8</sub>SO<sub>2</sub>Ph-*o*-C), 127.0 (C<sub>5</sub>), 125.9 (C<sub>4</sub>), 118.9 (C<sub>7</sub>), 81.5 (2C, C<sub>8a</sub>, N<sub>1</sub>CO<sub>2</sub>C(CH<sub>3</sub>)<sub>3</sub>), 47.3 (C<sub>3a</sub>), 46.0 (C<sub>2</sub>), 31.4 (C<sub>3</sub>), 29.0 (N<sub>1</sub>CO<sub>2</sub>C(CH<sub>3</sub>)<sub>3</sub>).

FTIR (thin film) cm<sup>-1</sup>: 2976 (m), 1697 (s), 1477 (w), 1393 (s), 1172 (s).

HRMS (ESI) ( $m/z$ ): calc'd for C<sub>21</sub>H<sub>25</sub>N<sub>2</sub>O<sub>4</sub>S [M+H]<sup>+</sup>: 401.1530, found: 401.1558.

$[\alpha]_D^{24}$ : +188 ( $c = 1.3$ , CH<sub>2</sub>Cl<sub>2</sub>).

TLC (25% acetone in hexanes), R<sub>f</sub>: 0.26 (UV, CAM).



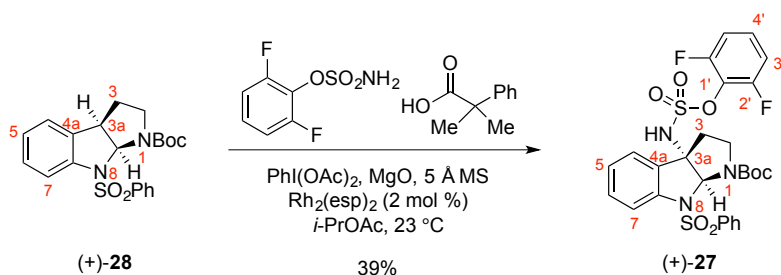

### Sulfamate ester (+)-27:

A round bottom flask equipped with a stir bar was charged with crushed 5 Å molecular sieves (1.06 g, 200 mg/mmol of **28**), and magnesium oxide (853 mg, 21.2 mmol, 4.00 equiv). The flask and its contents were flame-dried under vacuum for 7 min. The reaction vessel was allowed to cool to 23 °C and was then backfilled with argon. Bis[rhodium( $\alpha,\alpha,\alpha',\alpha'$ -tetramethyl-1,3-benzenedipropionic acid)] (80.2 mg, 106  $\mu\text{mol}$ , 0.0200 equiv), cyclotryptamine (+)-**28** (2.13 g, 5.29 mmol, 1 equiv), 2,6-difluorophenyl sulfamate<sup>5</sup> (1.44 g, 6.88 mmol, 1.30 equiv), and 2-methyl-2-phenylpropionic acid (434 mg, 2.65 mmol, 0.500 equiv) were then added sequentially. The flask was evacuated and backfilled with argon (three cycles) and was then charged with isopropyl acetate (7.0 mL). The resulting green suspension was stirred vigorously for 5 min then (diacetoxyiodo)benzene (3.41 g, 10.6 mmol, 2.00 equiv) was added in a single portion. The flask was sealed and the suspension was allowed to stir vigorously at 23 °C under a static atmosphere of argon. After 26 h, the reaction mixture was filtered through a pad of Celite and the filter cake was rinsed with ethyl acetate (50 mL). The filtrate was concentrated under reduced pressure and the resulting residue was purified by flash column chromatography on silica gel (eluent: 20 $\rightarrow$ 30% acetone in hexanes) to afford a mixture of the desired sulfamate ester (+)-**27** along with a minor amount of the regioisomeric C2 amination product (5.4:1). The mixture was further purified by recrystallization from dichloromethane, hexanes, and diethyl ether (1:1:1, 4.5 mL) at 5 °C to afford exclusively the sulfamate ester (+)-**27** (1.26 g, 39.2%) as an off-white solid.

As a result of the slow conformational equilibration at ambient temperature, NMR spectra were collected at elevated temperature. Structural assignments were made using additional information from gCOSY, HSQC, and HMBC experiments also collected at elevated temperature.

<sup>1</sup>H NMR (500 MHz, CD<sub>3</sub>CN, 60 °C):  $\delta$  7.81 (br-s, 2H, N<sub>8</sub>SO<sub>2</sub>Ph-*o*-H), 7.58–7.54 (m, 2H, N<sub>8</sub>SO<sub>2</sub>Ph-*p*-H, C<sub>7</sub>H), 7.47–7.38 (m, 4H, N<sub>8</sub>SO<sub>2</sub>Ph-*m*-H, C<sub>6</sub>H, C<sub>4</sub>H), 7.37–7.32 (m, 1H, C<sub>4'</sub>H), 7.20 (app-td,  $J = 7.7, 1.0$  Hz, 1H, C<sub>5</sub>H), 7.13 (app-t,  $J = 8.3$  Hz, 1H C<sub>3</sub>H), 6.61 (br-s, 1H, NHSO<sub>3</sub>Ar), 6.51 (s, 1H, C<sub>8a</sub>H), 3.91 (br-s, 1H, C<sub>2</sub>H<sub>a</sub>), 2.80–2.60 (m, 2H, C<sub>2</sub>H<sub>b</sub>, C<sub>3</sub>H<sub>a</sub>), 2.36 (dd,  $J = 12.0, 4.6$  Hz, 1H, C<sub>3</sub>H<sub>b</sub>), 1.47 (s, 9H, N<sub>1</sub>CO<sub>2</sub>C(CH<sub>3</sub>)<sub>3</sub>).

<sup>13</sup>C NMR (125.8 MHz, CD<sub>3</sub>CN, 60 °C):  $\delta$  157.3 (dd,  $J = 251.7, 3.5$  Hz, C<sub>2'</sub>), 154.6 (N<sub>1</sub>CO<sub>2</sub>C(CH<sub>3</sub>)<sub>3</sub>), 143.5 (C<sub>7a</sub>), 139.9 (N<sub>8</sub>SO<sub>2</sub>Ph-*ipso*-C), 134.8 (N<sub>8</sub>SO<sub>2</sub>Ph-*p*-C), 132.3 (C<sub>6</sub>), 131.6 (C<sub>4a</sub>), 130.6 (N<sub>8</sub>SO<sub>2</sub>Ph-*m*-C), 129.8 (app-t,  $J = 9.5$  Hz, C<sub>4'</sub>), 128.4 (N<sub>8</sub>SO<sub>2</sub>Ph-*o*-C), 127.7 (app-t,  $J =$

15.7 Hz, C<sub>1'</sub>), 126.6 (C<sub>4</sub>), 126.4 (C<sub>5</sub>), 117.7 (C<sub>7</sub>),  
114.1 (dd, *J* = 18.4, 4.0 Hz), 84.3 (C<sub>8a</sub>), 81.9  
(N<sub>1</sub>CO<sub>2</sub>C(CH<sub>3</sub>)<sub>3</sub>), 74.3 (C<sub>3a</sub>), 46.0 (C<sub>2</sub>), 36.9 (C<sub>3</sub>),  
28.9 (N<sub>1</sub>CO<sub>2</sub>C(CH<sub>3</sub>)<sub>3</sub>).

<sup>19</sup>F NMR (282 MHz, CDCl<sub>3</sub>, 20 °C): δ -124.8 (s, C<sub>6</sub>H<sub>3</sub>F<sub>2</sub>).

FTIR (thin film) cm<sup>-1</sup>: 3231 (br-w), 2979 (w), 1701 (s), 1676 (s), 1481 (s).

HRMS (ESI) (*m/z*): calc'd for C<sub>27</sub>H<sub>28</sub>F<sub>2</sub>N<sub>3</sub>O<sub>7</sub>S<sub>2</sub> [M+H]<sup>+</sup>: 608.1331,  
found: 608.1347.

[α]<sub>D</sub><sup>24</sup>: +42 (*c* = 0.97, CH<sub>2</sub>Cl<sub>2</sub>).

TLC (33% acetone in hexanes), *R<sub>f</sub>*: 0.34 (UV, CAM).

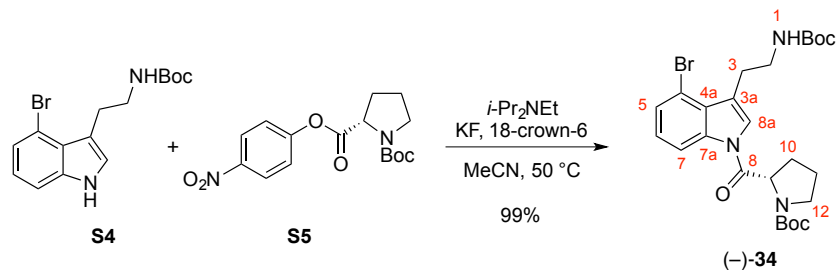

#### Amide (-)-**34**:

A 100 mL Schlenk flask containing a magnetic stir-bar was charged with 18-crown-6 (5.50 g, 20.8 mmol, 2.00 equiv), potassium fluoride (2.44 g, 41.6 mmol, 4.00 equiv), bromotryptamine **S4** (3.53 g, 10.4 mmol, 1 equiv), and L-proline derivative **S5** (6.12 g, 18.2 mmol, 1.75 equiv) sequentially.<sup>7</sup> The reaction flask and its contents were placed under vacuum and backfilled with argon (three cycles). Acetonitrile (42 mL) and *N,N*-diisopropylethylamine (6.40 mL, 46.8 mmol, 4.50 equiv) were then added. The resulting bright yellow heterogeneous mixture was sonicated for 1 h and then the flask was immersed in a pre-heated oil bath at 50 °C and stirred vigorously for 16 h. The reaction mixture was concentrated under reduced pressure. The residue was dissolved in ethyl acetate (100 mL) and was washed sequentially with deionized water (50 mL), a saturated aqueous potassium carbonate–water solution (1:1, 2 × 50 mL), deionized water (50 mL), and a saturated aqueous sodium chloride solution (2 × 50 mL). The organic phase was dried over anhydrous sodium sulfate, was filtered, and was concentrated under reduced pressure. The resulting light brown oil was purified by flash column chromatography on silica gel (eluent: 10%→40% ethyl acetate in hexanes) to afford amide (-)-**34** (5.50 g, 98.6%) as a white foam. Structural assignments were made using additional information from gCOSY, HSQC, and HMBC experiments.

<sup>1</sup>H NMR (500 MHz, CD<sub>3</sub>CN, 20 °C, 1.6:1 mixture of atropisomers, \*denotes minor atropisomer):

δ 8.51 (d, *J* = 8.3 Hz, 1H, C<sub>7</sub>H), 8.41 (d, *J* = 8.2 Hz, 1H, C<sub>7</sub>H\*), 7.62 (br-s, 2H, C<sub>8a</sub>H, C<sub>8a</sub>H\*), 7.47 (d, *J* = 7.8 Hz, 1H, C<sub>5</sub>H), 7.46 (d, *J* = 7.9 Hz, 1H, C<sub>5</sub>H\*), 7.22 (app-t, *J* = 8.1 Hz, 1H, C<sub>6</sub>H), 7.20 (app-t, *J* = 8.1 Hz, 1H, C<sub>6</sub>H\*), 5.42 (br-s, 2H, N<sub>1</sub>H, N<sub>1</sub>H\*), 5.04 (dd, *J* = 8.9, 3.8 Hz, 1H, C<sub>9</sub>H\*), 5.01 (dd, *J* = 8.6, 4.5 Hz, 1H, C<sub>9</sub>H), 3.55–3.46 (m, 4H, C<sub>12</sub>H<sub>2</sub>, C<sub>12</sub>H<sub>2</sub>\*), 3.46–3.41 (m, 4H, C<sub>2</sub>H<sub>2</sub>, C<sub>2</sub>H<sub>2</sub>\*), 3.04–3.19 (m, 4H, C<sub>3</sub>H<sub>2</sub>, C<sub>3</sub>H<sub>2</sub>\*), 2.47–2.36 (m, 2H, C<sub>10</sub>H<sub>a</sub>, C<sub>10</sub>H<sub>a</sub>\*), 2.08–1.97 (m, 2H, C<sub>10</sub>H<sub>b</sub>, C<sub>10</sub>H<sub>b</sub>\*), 1.97–1.87 (m, 4H, C<sub>11</sub>H<sub>2</sub>, C<sub>11</sub>H<sub>2</sub>\*), 1.43 (s, 9H, NCO<sub>2</sub>C(CH<sub>3</sub>)<sub>3</sub>\*), 1.38 (s, 9H, NHCO<sub>2</sub>C(CH<sub>3</sub>)<sub>3</sub>), 1.37 (s, 9H, NHCO<sub>2</sub>C(CH<sub>3</sub>)<sub>3</sub>\*), 1.18 (s, 9H, NCO<sub>2</sub>C(CH<sub>3</sub>)<sub>3</sub>).

<sup>13</sup>C NMR (125.8 MHz, CD<sub>3</sub>CN, 20 °C, 1.6:1 mixture of atropisomers, \*denotes minor atropisomer): δ 173.2 (C<sub>8</sub>), 172.4 (C<sub>8</sub>\*), 157.3

<sup>7</sup> (a) Benkovics, T.; Guzei, I. A.; Yoon, T. P. *Angew. Chem. Int. Ed.* **2010**, *49*, 9153. (b) Delgado, R.; Blakey, S. B. *Eur. J. Org. Chem.* **2009**, 1506.

(NHCO<sub>2</sub>C(CH<sub>3</sub>)<sub>3</sub>), 155.5 (NCO<sub>2</sub>C(CH<sub>3</sub>)<sub>3</sub>\*), 154.7 (NCO<sub>2</sub>C(CH<sub>3</sub>)<sub>3</sub>), 139.1 (C<sub>7a</sub>, C<sub>7a</sub>\*), 129.8 (C<sub>4a</sub>, C<sub>4a</sub>\*), 129.6 (C<sub>5</sub>), 129.5 (C<sub>5</sub>\*), 127.5 (C<sub>6</sub>), 127.4 (C<sub>6</sub>\*), 125.9 (2C, C<sub>8a</sub>\*, C<sub>8a</sub>), 121.4 (C<sub>3a</sub>), 121.3 (C<sub>3a</sub>\*), 117.1 (C<sub>7</sub>), 117.1 (C<sub>7</sub>\*), 115.0 (C<sub>4</sub>, C<sub>4</sub>\*), 80.7 (NCO<sub>2</sub>C(CH<sub>3</sub>)<sub>3</sub>\*), 80.6 (NCO<sub>2</sub>C(CH<sub>3</sub>)<sub>3</sub>), 79.5 (NHCO<sub>2</sub>C(CH<sub>3</sub>)<sub>3</sub>), 60.7 (C<sub>9</sub>), 60.6 (C<sub>9</sub>\*), 48.1 (C<sub>12</sub>\*), 47.8 (C<sub>12</sub>), 41.64 (C<sub>2</sub>), 41.61 (C<sub>2</sub>\*), 32.3 (C<sub>10</sub>), 31.4 (C<sub>10</sub>\*), 29.1 (NCO<sub>2</sub>C(CH<sub>3</sub>)<sub>3</sub>\*), 29.0 (NCO<sub>2</sub>C(CH<sub>3</sub>)<sub>3</sub>), 28.7 (NHCO<sub>2</sub>C(CH<sub>3</sub>)<sub>3</sub>), 28.1 (C<sub>3</sub>\*), 28.1 (C<sub>3</sub>), 25.5 (C<sub>11</sub>), 24.9 (C<sub>11</sub>).

FTIR (thin film) cm<sup>-1</sup>: 3360 (br-w), 2977 (m), 1700 (s), 1423 (s), 1167 (s).

HRMS (ESI) (*m/z*): calc'd for C<sub>25</sub>H<sub>35</sub>BrN<sub>3</sub>O<sub>5</sub> [M+H]<sup>+</sup>: 536.1755, found: 536.1759.

[α]<sub>D</sub><sup>24</sup>: -52 (*c* = 0.54, CH<sub>2</sub>Cl<sub>2</sub>).

TLC (30% ethyl acetate in hexanes), R<sub>f</sub>: 0.13 (UV, CAM).

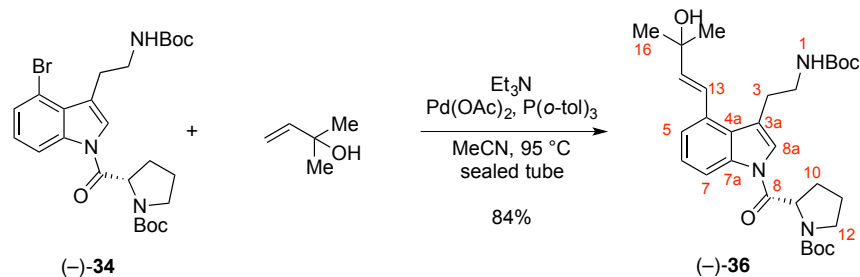

### Allylic alcohol (-)-**36**:

Acetonitrile (10.8 mL), triethylamine (2.00 mL, 14.5 mmol, 1.50 equiv), and 1,1-dimethylallyl alcohol (4.65 mL, 43.6 mmol, 4.50 equiv) were sequentially added to a 100 mL pressure tube containing palladium(II) acetate (174 mg, 0.78 mmol, 0.0800 equiv), tri(*o*-tolyl)phosphine (590 mg, 1.94 mmol, 0.200 equiv), and amide (-)-**34** (5.20 g, 9.69 mmol, 1 equiv). The reaction tube was sealed under an argon atmosphere and immersed in a pre-heated oil bath at 95 °C. After 3.5 h, the reaction mixture was cooled to 23 °C and was filtered through a pad of silica gel. The filter cake was washed with ethyl acetate (100 mL) and the filtrate was concentrated under reduced pressure. The thick orange oil was purified by flash column chromatography on silica gel (eluent: 10%→75% acetone in hexanes). The resulting yellow sticky foam was purified by flash column chromatography on silica gel (eluent: 10%→40% ethyl acetate in hexanes) to afford allylic alcohol (-)-**36** (4.40 g, 83.8%) as a white foam. Structural assignments were made using additional information from gCOSY, HSQC, and HMBC experiments.

<sup>1</sup>H NMR (500 MHz, CD<sub>3</sub>CN, 20 °C, 1.6:1 mixture of atropisomers, \*denotes minor atropisomer):  
 $\delta$  8.39 (d, *J* = 8.0 Hz, 1H, C<sub>7</sub>H), 8.34 (d, *J* = 8.3 Hz, 1H, C<sub>7</sub>H\*), 7.55 (s, 1H, C<sub>8a</sub>H\*), 7.54 (s, 1H, C<sub>8a</sub>H), 7.35 (d, *J* = 7.4 Hz, 2H, C<sub>5</sub>H, C<sub>5</sub>H\*), 7.30 (app-t, *J* = 7.4 Hz, 2H, C<sub>6</sub>H, C<sub>6</sub>H\*), 7.28 (d, *J* = 15.5 Hz, 2H, C<sub>13</sub>H, C<sub>13</sub>H\*), 6.34 (d, *J* = 15.8 Hz, 2H, C<sub>14</sub>H, C<sub>14</sub>H\*), 5.61 (br-dd, *J* = 12.7, 7.0 Hz 2H, N<sub>1</sub>H, N<sub>1</sub>H\*), 5.03 (dd, *J* = 8.4, 3.1 Hz, 1H, C<sub>9</sub>H\*), 5.01 (dd, *J* = 8.4, 4.2 Hz, 1H, C<sub>9</sub>H), 3.64 (s, 2H, OH, OH\*), 3.56–3.44 (m, 4H, C<sub>12</sub>H<sub>2</sub>, C<sub>12</sub>H<sub>2</sub>\*), 3.34–3.29 (m, 4H, C<sub>2</sub>H<sub>2</sub>, C<sub>2</sub>H<sub>2</sub>\*), 3.01 (app-t, *J* = 7.5 Hz, 4H, C<sub>3</sub>H<sub>2</sub>, C<sub>3</sub>H<sub>2</sub>\*), 2.46–2.35 (m, 2H, C<sub>10</sub>H<sub>a</sub>, C<sub>10</sub>H<sub>a</sub>\*), 2.08–1.88 (m, 6H, C<sub>10</sub>H<sub>b</sub>, C<sub>10</sub>H<sub>b</sub>\*, C<sub>11</sub>H<sub>2</sub>, C<sub>11</sub>H<sub>2</sub>\*), 1.44 (s, 9H, NCO<sub>2</sub>C(CH<sub>3</sub>)<sub>3</sub>\*), 1.41 (s, 9H, NHCO<sub>2</sub>C(CH<sub>3</sub>)<sub>3</sub>), 1.36 (s, 12H, C<sub>16a</sub>H<sub>3</sub>, C<sub>16a</sub>H<sub>3</sub>\*), C<sub>16b</sub>H<sub>3</sub>, C<sub>16b</sub>H<sub>3</sub>\*), 1.17 (s, 9H, NCO<sub>2</sub>C(CH<sub>3</sub>)<sub>3</sub>).

<sup>13</sup>C NMR (125.8 MHz, CD<sub>3</sub>CN, 20 °C, 1.6:1 mixture of atropisomers, \*denotes minor atropisomer):  $\delta$  173.2 (C<sub>8</sub>), 172.4 (C<sub>8</sub>\*), 157.5 (NHCO<sub>2</sub>C(CH<sub>3</sub>)<sub>3</sub>\*), 155.6 (NCO<sub>2</sub>C(CH<sub>3</sub>)<sub>3</sub>), 154.8 (NCO<sub>2</sub>C(CH<sub>3</sub>)<sub>3</sub>), 143.4 (C<sub>14</sub>), 143.3 (C<sub>14</sub>\*), 138.3 (2C, C<sub>7a</sub>, C<sub>7a</sub>\*), 133.5 (C<sub>4</sub>), 133.4 (C<sub>4</sub>\*), 128.7 (2C, C<sub>4a</sub>, C<sub>4a</sub>\*), 126.6 (2C, C<sub>6</sub>, C<sub>6</sub>\*), 124.8 (C<sub>8a</sub>, C<sub>8a</sub>\*),

124.4 (C<sub>13</sub>), 124.3 (C<sub>13</sub>\*), 123.0 (2C, C<sub>5</sub>, C<sub>5</sub>\*), 121.8 (C<sub>3a</sub>\*), 121.6 (C<sub>3a</sub>), 116.5 (2C, C<sub>7</sub>, C<sub>7</sub>\*), 80.7 (NCO<sub>2</sub>C(CH<sub>3</sub>)<sub>3</sub>\*), 80.5 (NCO<sub>2</sub>C(CH<sub>3</sub>)<sub>3</sub>), 80.0 (NHCO<sub>2</sub>C(CH<sub>3</sub>)<sub>3</sub>), 71.6 (2C, C<sub>15</sub>, C<sub>15</sub>\*), 60.6 (C<sub>9</sub>), 60.5 (C<sub>9</sub>\*), 48.1 (C<sub>12</sub>\*), 47.9 (C<sub>12</sub>), 42.2 (2C, C<sub>2</sub>, C<sub>2</sub>\*), 32.3 (C<sub>10</sub>), 31.4 (C<sub>10</sub>\*), 30.6 (2C, C<sub>16</sub>\*, C<sub>16</sub>), 29.6 (2C, C<sub>3</sub>\*, C<sub>3</sub>), 29.1 (NCO<sub>2</sub>C(CH<sub>3</sub>)<sub>3</sub>\*), 29.0 (NCO<sub>2</sub>C(CH<sub>3</sub>)<sub>3</sub>), 28.7 (NHCO<sub>2</sub>C(CH<sub>3</sub>)<sub>3</sub>), 25.5 (C<sub>11</sub>\*), 24.9 (C<sub>11</sub>).

FTIR (thin film) cm<sup>-1</sup>: 3397 (br-m), 2975 (s), 1696 (s), 1521 (m), 1163 (s).

HRMS (ESI) (*m/z*): calc'd for C<sub>30</sub>H<sub>47</sub>N<sub>4</sub>O<sub>6</sub> [M+NH<sub>4</sub>]<sup>+</sup>: 559.3490, found: 559.3493.

[α]<sub>D</sub><sup>24</sup>: -50 (*c* = 0.80, CH<sub>2</sub>Cl<sub>2</sub>).

TLC (30% acetone in hexanes), R<sub>f</sub>: 0.33 (UV, CAM).

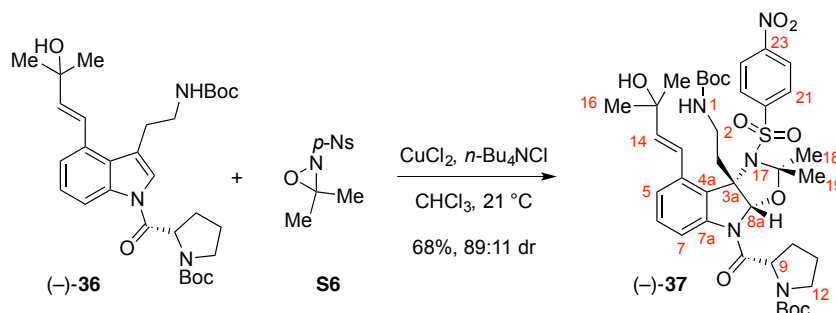

### Oxazoline (-)-37:

Copper(II) chloride (1.03 g, 7.62 mmol, 1.00 equiv) and tetra-*n*-butylammonium chloride<sup>8</sup> (4.13 g, 7.62 mmol, 1.00 equiv) were added to a 100 mL Schlenk flask. Chloroform (38 mL) was added and the resulting dark red mixture was stirred vigorously for 20 min, at which point allylic alcohol (-)-36 (4.13 g, 7.62 mmol, 1 equiv) and oxaziridine S6<sup>9</sup> (2.56 g, 9.91 mmol, 1.30 equiv) were added. After stirring at 21 °C for 1.5 h, the reaction mixture was filtered through a pad of silica gel, and the filter cake was washed with an ethyl acetate–hexanes solution (1:1, 800 mL). The yellow filtrate was concentrated under reduced pressure and the residue was purified by flash column chromatography on silica gel (eluent: 10%→40% ethyl acetate in hexanes). Further purification by chromatography on silica gel (eluent: 10%→30% acetone in hexanes) afforded oxazoline (-)-37 (4.16 g, 68.1%) as a pale yellow foam as an inseparable mixture of diastereomers (89:11 dr). The diastereomeric ratio was determined after derivatization of oxazoline (-)-37. Structural assignments for the major diastereomer were made using additional information from gCOSY, HSQC, and HMBC experiments.

<sup>1</sup>H NMR (500 MHz, CD<sub>3</sub>CN, 20 °C, ~1.9:1 mixture of atropisomers, \*denotes minor atropisomer): δ 8.05 (d, *J* = 8.1 Hz, 1H, C<sub>7</sub>H), 7.98 (d, *J* = 7.8 Hz, 1H, C<sub>7</sub>H\*), 7.90 (d, *J* = 9.1 Hz, 4H, C<sub>22</sub>H<sub>2</sub>, C<sub>22</sub>H<sub>2</sub>\*), 7.48 (d, *J* = 9.0 Hz, 4H, C<sub>21</sub>H<sub>2</sub>, C<sub>21</sub>H<sub>2</sub>\*), 7.32 (d, *J* = 15.7 Hz, 1H, C<sub>13</sub>H\*), 7.31 (d, *J* = 15.8 Hz, 1H, C<sub>13</sub>H), 6.99 (app-t, *J* = 8.1 Hz, 1H, C<sub>6</sub>H), 6.95 (app-t, *J* = 8.1 Hz, 1H, C<sub>6</sub>H\*), 6.66 (d, *J* = 7.8 Hz, 1H, C<sub>5</sub>H), 6.61 (d, *J* = 7.3 Hz, 1H, C<sub>5</sub>H\*), 6.61 (s, 1H, C<sub>8a</sub>H\*), 6.33 (s, 1H, C<sub>8a</sub>H), 6.14 (d, *J* = 15.8 Hz, 1H, C<sub>14</sub>H), 6.13 (d, *J* = 15.8 Hz, 1H, C<sub>14</sub>H\*), 5.56 (br-s, 1H, N<sub>1</sub>H\*), 5.50 (br-s, 1H, N<sub>1</sub>H), 4.68 (dd, *J* = 7.7, 5.8 Hz, 1H, C<sub>9</sub>H\*), 4.50 (dd, *J* = 7.6, 6.0 Hz, 1H, C<sub>9</sub>H), 3.86 (s, 1H, OH\*), 3.80 (s, 1H, OH), 3.52–3.40 (m, 4H, C<sub>12</sub>H<sub>2</sub>, C<sub>12</sub>H<sub>2</sub>\*), 3.39–3.28 (m, 2H, C<sub>3</sub>H, C<sub>3</sub>H\*), 3.21–3.07 (m, 2H, C<sub>2</sub>H, C<sub>2</sub>H\*), 2.68–2.55 (m, 2H, C<sub>2</sub>H\*, C<sub>2</sub>H), 2.53–2.46 (m, 1H, C<sub>10</sub>H), 2.35–2.28 (m, 1H, C<sub>10</sub>H\*), 2.25–2.11 (m, 3H, C<sub>3</sub>H, C<sub>3</sub>H\*, C<sub>11</sub>H\*), 2.10–2.00 (m, 3H, C<sub>10</sub>H, C<sub>10</sub>H\*, C<sub>11</sub>H), 1.92–1.86 (m, 14H, C<sub>18</sub>H<sub>3</sub>,

<sup>8</sup> This reagent was azeotropically dried by concentration from benzene (three times) immediately before use.

<sup>9</sup> Benkovic, T.; Du, J. Guzei, I. A.; Yoon, T. P. *J. Org. Chem.* **2009**, *74*, 5545.

$C_{18}H_3^*$ ,  $C_{19}H_3$ ,  $C_{19}H_3^*$ ,  $C_{11}H$ ,  $C_{11}H^*$ , 1.45–1.34  
and 1.06 (app-m, 36H,  $NCO_2C(CH_3)_3$ ,  
 $NCO_2C(CH_3)_3^*$ ,  $N_1HCO_2C(CH_3)_3$ ,  
 $N_1HCO_2C(CH_3)_3^*$ ).

$^{13}C$  NMR (125.8 MHz,  $CD_3CN$ , 20 °C, ~1.9:1 mixture of atropisomers, \*denotes minor atropisomer):  $\delta$  176.0 ( $C_8^*$ ), 175.6 ( $C_8$ ), 157.4 (2C,  $N_1HCO_2C(CH_3)_3$ ,  $N_1HCO_2C(CH_3)_3^*$ ), 155.9 ( $NCO_2C(CH_3)_3^*$ ), 154.5 ( $NCO_2C(CH_3)_3$ ), 150.8 (2C,  $C_{20/23}$ ,  $C_{20/23}^*$ ), 147.7 ( $C_{20/23}^*$ ), 147.6 ( $C_{20/23}$ ), 144.3 ( $C_{14/7a}$ ), 144.2 ( $C_{14/7a}^*$ ), 144.1 ( $C_{14/7a}^*$ ), 144.0 ( $C_{14/7a}$ ), 138.1 (2C,  $C_4$ ,  $C_4^*$ ), 132.4 ( $C_6$ ), 132.3 ( $C_6^*$ ), 129.3 (2C,  $C_{21}$ ,  $C_{21}^*$ ), 129.2 (2C,  $C_{22}$ ,  $C_{22}^*$ ), 124.0 ( $C_{13}$ ), 122.5 ( $C_5$ ), 122.3 ( $C_5^*$ ), 116.5 ( $C_7^*$ ), 115.7 ( $C_7$ ), 103.2 ( $C_{17}$ ), 102.7 ( $C_{17}^*$ ), 97.8 ( $C_{8a}^*$ ), 97.5 ( $C_{8a}$ ), 80.8 ( $NCO_2C(CH_3)_3$ ), 80.5 (3C,  $NCO_2C(CH_3)_3$ , ( $NCO_2C(CH_3)_3$ ), ( $NCO_2C(CH_3)_3$ ), 75.9 ( $C_{3a}$ ), 75.7 ( $C_{3a}^*$ ), 71.5 (2C,  $C_{15}$ ,  $C_{15}^*$ ), 60.1 ( $C_9$ ), 59.3 ( $C_9^*$ ), 48.6 ( $C_{12}$ ), 48.5 ( $C_{12}^*$ ), 38.4 ( $C_2^*$ ), 38.3 ( $C_2$ ), 30.7, 30.6, 30.4, 30.2, 29.7, 29.1, 29.0, 28.8 36.6 (2C,  $C_3$ ,  $C_3^*$ ), 33.1 ( $C_{10}$ ), 32.9 (2C), 31.5 ( $C_{10}^*$ ), 26.2 ( $C_{11}^*$ ), 25.2 ( $C_{11}$ ).

FTIR (thin film)  $cm^{-1}$ : 3447 (br-w), 2976 (m), 1685 (s), 1533 (s), 1164 (s).

HRMS (ESI) ( $m/z$ ): calc'd for  $C_{39}H_{57}N_6O_{11}S [M+NH_4]^+$ : 817.3801,  
found: 817.3808.

$[\alpha]_D^{24}$ : -84 ( $c = 0.51$ ,  $CH_2Cl_2$ ).

TLC (30% acetone in hexanes), R<sub>f</sub>: 0.33 (UV, CAM).



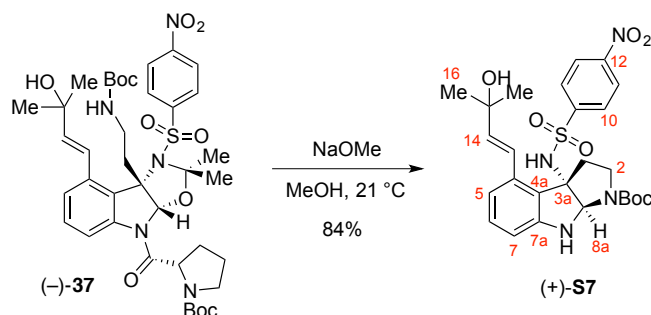

### **Aminocyclotryptamine (+)-S7:**

A solution of sodium methoxide (142 mg, 2.50 mmol, 50.0 equiv) in methanol (1.0 mL) was added to a solution of oxazoline (-)-**37** (40.0 mg, 50.0  $\mu$ mol, 1 equiv) in methanol (0.5 mL). After stirring at 21 °C for 24 h, the light yellow solution was diluted with a mixture of saturated aqueous ammonium chloride–water (1:1, 10 mL) and was extracted with dichloromethane (5  $\times$  5 mL). The combined extracts were dried over anhydrous sodium sulfate, were filtered, and were concentrated under reduced pressure. The resulting yellow film was purified by flash column chromatography on silica gel (eluent: 10%  $\rightarrow$  40% ethyl acetate in hexanes) to afford aminocyclotryptamine (+)-**S7** (4.40 g, 83.8%, 89:11 er) as a yellow solid. The enantiomeric ratio was determined by chiral HPLC analysis (Chiralpak IA, 80% *i*PrOH / 20% hexanes, 1.0 mL/min, 254 nm,  $t_R$  (major) = 7.8 min,  $t_R$  (minor) = 6.5 min). Structural assignments were made using additional information from gCOSY, HSQC, and HMBC experiments.

$^1\text{H}$  NMR (500 MHz,  $\text{CD}_3\text{CN}$ , 20 °C,  $\sim$ 1.5:1 mixture of atropisomers):

$\delta$  8.05 (d,  $J$  = 8.6 Hz, 2H,  $\text{C}_{11}\text{H}_2$ ), 7.49 (d,  $J$  = 8.2 Hz, 1H,  $\text{C}_{10}\text{H}_2$ ), 7.01 (app-t, 1H,  $J$  = 7.5 Hz,  $\text{C}_6\text{H}$ ), 6.88 (br-s, 1H, OH/NH), 6.50 (br-d,  $J$  = 7.9 Hz, 1H,  $\text{C}_7\text{H}$ ), 6.46 (d,  $J$  = 7.8 Hz, 1H,  $\text{C}_5\text{H}$ ), 6.26 (d,  $J$  = 16.0 Hz, 1H,  $\text{C}_{13}\text{H}$ ), 5.96 (d,  $J$  = 15.9 Hz, 1H,  $\text{C}_{14}\text{H}$ ), 5.63 (s, 0.4H,  $\text{N}_{8a}\text{H}$ ), 5.57 (s, 0.6H,  $\text{N}_{8a}\text{H}$ ), 5.47 (s, 0.4H,  $\text{N}_8\text{H}$ ), 5.44 (s, 0.6H,  $\text{N}_8\text{H}$ ), 3.60 (dd,  $J$  = 10.4, 6.7 Hz, 1H,  $\text{C}_2\text{H}_a$ ), 2.85–2.71 (m, 2H,  $\text{C}_2\text{H}_b$ , OH/NH), 2.41–2.32 (m, 2H,  $\text{C}_3\text{H}_a$ ,  $\text{C}_3\text{H}_b$ ), 1.48 (s, 9H,  $\text{NCO}_2\text{C}(\text{CH}_3)_3$ ), 1.43 (s, 9H,  $\text{NCO}_2\text{C}(\text{CH}_3)_3$ ), 1.22 (s, 3H,  $\text{C}_{16}\text{H}_3$ ), 1.19 (s, 3H,  $\text{C}_{16}\text{H}_3$ ).

$^{13}\text{C}$  NMR (125.8 MHz,  $\text{CD}_3\text{CN}$ , 20 °C,  $\sim$ 1.5:1 mixture of atropisomers, \*denotes minor atropisomer):  $\delta$  155.3 ( $\text{NCO}_2\text{C}(\text{CH}_3)_3^*$ ), 154.7 ( $\text{NCO}_2\text{C}(\text{CH}_3)_3$ ), 152.9 ( $\text{C}_{7a}$ ), 150.9 ( $\text{C}_{9/12}$ ), 147.9 ( $\text{C}_{9/12}$ ), 141.5 ( $\text{C}_{14}$ ), 136.1 ( $\text{C}_{14}$ ), 131.8 ( $\text{C}_6$ ), 129.5 ( $\text{C}_{10/11}$ ), 125.2 ( $\text{C}_{10/11}$ ), 122.5 ( $\text{C}_{4a}$ ), 122.0 ( $\text{C}_{13}$ ), 116.3 ( $\text{C}_5^*$ ), 116.2 ( $\text{C}_5$ ), 109.7 ( $\text{C}_7^*$ ), 109.5 ( $\text{C}_7$ ), 82.2 ( $\text{C}_{8a}$ ), 81.1 ( $\text{NCO}_2\text{C}(\text{CH}_3)_3$ ), 80.9 ( $\text{NCO}_2\text{C}(\text{CH}_3)_3^*$ ), 74.8 ( $\text{C}_{3a}$ ), 73.9 ( $\text{C}_{3a}^*$ ), 71.4 ( $\text{C}_{15}$ ), 44.9 ( $\text{C}_2^*$ ), 44.2 ( $\text{C}_2$ ), 38.5 ( $\text{C}_3^*$ ), 38.0 ( $\text{C}_3$ ), 30.5 ( $\text{C}_{16}$ ), 30.2 ( $\text{C}_{16}$ ), 24.9 ( $\text{NCO}_2\text{C}(\text{CH}_3)_3$ ).

FTIR (thin film)  $\text{cm}^{-1}$ : 3393 (br-m), 2976 (m), 1684 (s), 1532 (s), 1162 (s).

HRMS (ESI) ( $m/z$ ): calc'd for  $\text{C}_{26}\text{H}_{33}\text{N}_4\text{O}_7\text{S}$   $[\text{M}+\text{H}]^+$ : 545.2064,  
found: 545.2037.

$[\alpha]_{\text{D}}^{24}$ : +134 ( $c = 0.83$ ,  $\text{CH}_2\text{Cl}_2$ ).

TLC (50% ethyl acetate in hexanes),  $R_f$ : 0.17 (UV, CAM).

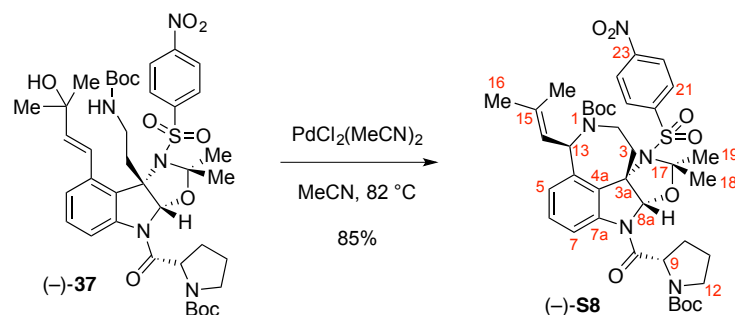

### Azepine (-)-S8:

Acetonitrile (70 mL) was added to a pressure tube containing bis(acetonitrile)dichloropalladium(II) (190 mg, 720  $\mu\text{mol}$ , 0.15 equiv) and oxazoline (-)-**37** (89:11 dr, 3.85 g, 4.81 mmol, 1 equiv). The tube was sealed under an argon atmosphere and was immersed in a pre-heated oil bath at 82  $^\circ\text{C}$ . After 4 h, the orange solution was cooled to 21  $^\circ\text{C}$  and the solvent was then removed under reduced pressure. The orange residue was purified by flash column chromatography on silica gel (eluent: 10% $\rightarrow$ 20% acetone in hexanes) to afford azepine (-)-**S8** (3.19 g, 84.8%) as a white powder. Structural assignments were made using additional information from gCOSY, HSQC, and HMBC experiments.

$^1\text{H}$  NMR (500 MHz,  $\text{CDCl}_3$ , 20  $^\circ\text{C}$ , ~1.1:1 mixture of atropisomers, \*denotes minor atropisomer):

$\delta$  8.07 (d,  $J = 8.1$  Hz, 1H,  $\text{C}_7\text{H}$ ), 8.04 (d,  $J = 8.0$  Hz, 1H,  $\text{C}_7\text{H}^*$ ), 7.91 (d,  $J = 8.8$  Hz, 2H,  $\text{C}_{22}\text{H}_2/\text{C}_{22}\text{H}_2^*$ ), 7.89 (d,  $J = 8.8$  Hz, 2H,  $\text{C}_{22}\text{H}_2/\text{C}_{22}\text{H}_2^*$ ), 7.16 (app-t,  $J = 8.1$  Hz, 1H,  $\text{C}_6\text{H}$ ), 7.12–7.08 (m, 5H,  $\text{C}_6\text{H}^*$ ,  $\text{C}_{21}\text{H}_2$ ,  $\text{C}_{21}\text{H}_2^*$ ), 6.65 (d,  $J = 8.0$  Hz, 1H,  $\text{C}_5\text{H}$ ), 6.59 (d,  $J = 8.0$  Hz, 1H,  $\text{C}_5\text{H}^*$ ), 6.27 (s, 1H,  $\text{C}_{8a}\text{H}^*$ ), 6.02 (s, 1H,  $\text{C}_{8a}\text{H}$ ), 6.00–5.95 (app-m, 2H,  $\text{C}_{13}\text{H}$ ,  $\text{C}_{13}\text{H}^*$ ), 5.21 (d,  $J = 9.6$  Hz, 1H,  $\text{C}_{14}\text{H}$ ), 5.14 (d,  $J = 9.4$  Hz, 1H,  $\text{C}_{14}\text{H}^*$ ), 4.64 (dd,  $J = 7.5, 4.6$  Hz, 1H,  $\text{C}_9\text{H}^*$ ), 4.43 (dd,  $J = 7.7, 5.9$  Hz, 1H,  $\text{C}_9\text{H}$ ), 3.94–3.80 (m, 2H,  $\text{C}_{2a}\text{H}$ ,  $\text{C}_{2a}\text{H}^*$ ), 3.59–3.41 (m, 4H,  $\text{C}_{12}\text{H}_2$ ,  $\text{C}_{12}\text{H}_2^*$ ), 3.20–3.15 (m, 4H,  $\text{C}_{2b}\text{H}$ ,  $\text{C}_{2b}\text{H}^*$ ,  $\text{C}_{3a}\text{H}$ ,  $\text{C}_{3a}\text{H}^*$ ), 2.26 (app-dt,  $J = 13.1, 7.3$  Hz, 1H,  $\text{C}_{10a}\text{H}/\text{C}_{10a}\text{H}^*$ ), 2.20–2.12 (m, 2H,  $\text{C}_{10a}\text{H}/\text{C}_{10a}\text{H}^*$ ,  $\text{C}_{11a}\text{H}/\text{C}_{11a}\text{H}^*$ ), 2.11–2.04 (m, 1H,  $\text{C}_{11a}\text{H}/\text{C}_{11a}\text{H}^*$ ), 2.02–1.93 (m, 2H,  $\text{C}_{10b}\text{H}$ ,  $\text{C}_{10b}\text{H}^*$ ), 1.86 (s, 3H,  $\text{C}_{16}\text{H}_3$ ), 1.84 (s, 3H,  $\text{C}_{18/19}\text{H}_3$ ), 1.84–1.80 (m, 1H,  $\text{C}_{11b}\text{H}/\text{C}_{11b}\text{H}^*$ ), 1.75–1.74 (app-m, 3H,  $\text{C}_{16}\text{H}_3^*$ ), 1.60–1.59 (app-m, 3H,  $\text{C}_{18/19}\text{H}_3^*$ ), 1.49, 1.34 and 1.05 (36H,  $\text{NCO}_2\text{C}(\text{CH}_3)_3$ ,  $\text{NCO}_2\text{C}(\text{CH}_3)_3^*$ ,  $\text{N}_1\text{HCO}_2\text{C}(\text{CH}_3)_3$ ,  $\text{N}_1\text{HCO}_2\text{C}(\text{CH}_3)_3^*$ ).

$^{13}\text{C}$  NMR (125.8 MHz,  $\text{CDCl}_3$ , 20  $^\circ\text{C}$ , ~1.1:1 mixture of atropisomers, \*denotes minor atropisomer):  $\delta$  175.2 ( $\text{C}_8^*$ ), 174.9 ( $\text{C}_8$ ), 154.7 ( $\text{CO}_2\text{C}(\text{CH}_3)_3$ ), 153.2 ( $\text{CO}_2\text{C}(\text{CH}_3)_3$ ), 149.4 (2C,  $\text{C}_{23}$ ,  $\text{C}_{23}^*$ ), 147.7 ( $\text{C}_{20}^*$ ), 147.5 ( $\text{C}_{20}$ ), 143.9 (2C,  $\text{C}_{7a}$ ,  $\text{C}_4$ ), 142.4 ( $\text{C}_{7a}^*/4^*$ ), 142.2 ( $\text{C}_{7a}^*/4^*$ ), 134.1 ( $\text{C}_{15}$ ,

br), 131.1 (C<sub>6</sub>), 130.8 (C<sub>6</sub>\*), 128.2 (2C, C<sub>21</sub>, C<sub>21</sub>\*), 124.6 (C<sub>14/14</sub>\*), 124.5 (C<sub>5</sub>), 124.4 (C<sub>5</sub>\*), 124.2 (C<sub>14/14</sub>\*), 123.7 (C<sub>22</sub>), 123.6 (C<sub>22</sub>\*), 123.4 (C<sub>4a</sub>), 115.0 (C<sub>7</sub>\*), 114.3 (C<sub>7</sub>), 100.8 (C<sub>8a</sub>), 100.7 (C<sub>17</sub>), 100.4 (C<sub>17</sub>\*), 80.4 (CO<sub>2</sub>C(CH<sub>3</sub>)<sub>3</sub>), 80.2 (CO<sub>2</sub>C(CH<sub>3</sub>)<sub>3</sub>), 75.8 (C<sub>3a</sub>\*), 75.5 (C<sub>3a</sub>), 58.2 (C<sub>9</sub>\*), 58.1 (C<sub>9</sub>), 58.0 (C<sub>13</sub>), 47.51 (C<sub>12</sub>), 47.49 (C<sub>12</sub>\*), 41.6 (C<sub>2</sub>), 41.4 (C<sub>2</sub>\*), 39.3 (C<sub>3</sub>), 39.1 (C<sub>3</sub>\*), 31.7 (C<sub>10/11</sub>), 31.6 (C<sub>10/11</sub>), 30.4 (C<sub>10</sub>\*), 29.3 (C<sub>18/19</sub>), 29.2 (C<sub>18/19</sub>), 28.8 (CO<sub>2</sub>C(CH<sub>3</sub>)<sub>3</sub>), 28.6 (CO<sub>2</sub>C(CH<sub>3</sub>)<sub>3</sub>), 28.3 (CO<sub>2</sub>C(CH<sub>3</sub>)<sub>3</sub>), 25.9 (C<sub>16</sub>), 25.0 (C<sub>10/11</sub>), 24.3 (C<sub>10/11</sub>), 18.9 (C<sub>16</sub>).

FTIR (thin film) cm<sup>-1</sup>: 2977 (m), 1685 (s), 1533 (m), 1395 (s), 1166 (s).

HRMS (ESI) (*m/z*): calc'd for C<sub>39</sub>H<sub>52</sub>N<sub>5</sub>O<sub>10</sub>S [M+H]<sup>+</sup>: 782.3429, found: 782.3449.

[α]<sub>D</sub><sup>24</sup>: -53 (*c* = 0.51, CH<sub>2</sub>Cl<sub>2</sub>).

TLC (20% acetone in hexanes), R<sub>f</sub>: 0.21 (UV, CAM).

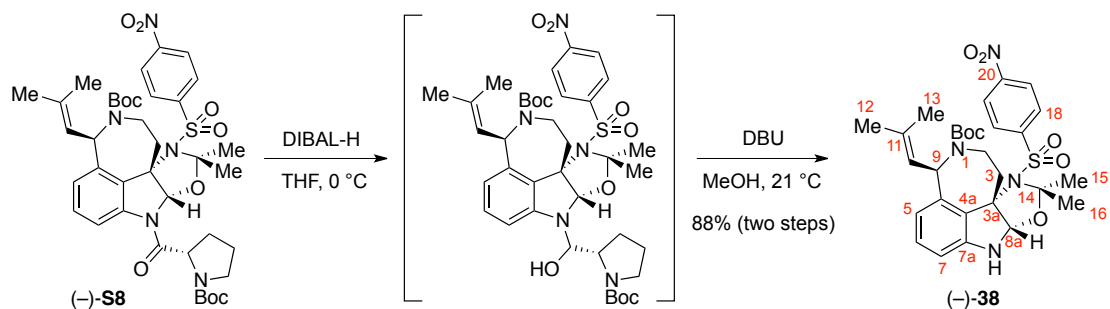

### Indoline (-)-38:

A solution of azepine (-)-**S8** (3.10 g, 3.96 mmol, 1 equiv) in tetrahydrofuran (59 mL) was cooled to  $-20\text{ }^{\circ}\text{C}$  and diisobutylaluminum hydride (1.0 M in hexanes, 11.9 mL, 11.0 mmol, 3.00 equiv) was added dropwise over 10 min. After 2 min, the reaction mixture was warmed to  $0\text{ }^{\circ}\text{C}$  and the orange solution was allowed to stir at this temperature. After 3 h, excess reducing agent was quenched cautiously by the dropwise addition of deionized water (11.9 mL). After gas evolution had subsided, an aqueous sodium hydroxide solution (1 N, 60 mL) was added. The resulting mixture was stirred vigorously for 15 min and was then extracted with ethyl acetate ( $3 \times 120\text{ mL}$ ). The combined organic extracts were dried over anhydrous sodium sulfate, were filtered through a pad of Celite, and were concentrated under reduced pressure. The residual ethyl acetate in the residue was removed by concentration from hexanes ( $3 \times 20\text{ mL}$ ) under reduced pressure to furnish crude hemiaminal intermediate as a yellow solid, containing a minor amount of the desired indoline (-)-**38** based on TLC analysis.

The crude mixture was dissolved in methanol (32 mL) at  $21\text{ }^{\circ}\text{C}$  and 1,8-diazabicycloundec-7-ene (890  $\mu\text{L}$ , 5.95 mmol, 1.50 equiv) was added via syringe. After stirring for 2.5 h, the solvent was removed under reduced pressure and the resulting orange oil was filtered through a pad of silica gel, washing the filter cake with ethyl acetate–hexanes solution (1:1, 250 mL). The filtrate was concentrated and the resulting orange oil was purified by flash column chromatography on silica gel (eluent: 10%  $\rightarrow$  20% ethyl acetate in hexanes) to afford indoline (-)-**38** (2.04 g, 87.9%) as a bright yellow solid. Structural assignments were made using additional information from gCOSY, HSQC, and HMBC experiments.

$^1\text{H}$  NMR (500 MHz,  $\text{CDCl}_3$ ,  $20\text{ }^{\circ}\text{C}$ ):  $\delta$  7.87 (d,  $J = 9.0\text{ Hz}$ , 2H,  $\text{C}_{19}\text{H}_2$ ), 7.17 (d,  $J = 9.0\text{ Hz}$ , 2H,  $\text{C}_{18}\text{H}_2$ ), 7.01 (app-t,  $J = 7.9\text{ Hz}$ , 1H,  $\text{C}_6\text{H}$ ), 6.46 (d,  $J = 7.9\text{ Hz}$ , 1H,  $\text{C}_5\text{H}$ ), 6.31 (d,  $J = 7.7\text{ Hz}$ , 1H,  $\text{C}_7\text{H}$ ), 5.96 (d,  $J = 8.5\text{ Hz}$ , 1H,  $\text{C}_9\text{H}$ ), 5.54 (d,  $J = 2.4\text{ Hz}$ , 1H,  $\text{C}_{8a}\text{H}$ ), 5.33 (d,  $J = 9.1\text{ Hz}$ , 1H,  $\text{C}_{10}\text{H}$ ), 4.34 (s, 1H, NH), 3.86 (d,  $J = 13.1\text{ Hz}$ , 1H,  $\text{C}_2\text{H}_a$ ), 3.23 (app-t,  $J = 11.6\text{ Hz}$ , 1H,  $\text{C}_2\text{H}_b$ ), 2.85 (ddd,  $J = 14.5, 10.6, 3.0\text{ Hz}$ , 1H,  $\text{C}_3\text{H}_a$ ), 2.25 (d,  $J = 15.0\text{ Hz}$ , 1H,  $\text{C}_3\text{H}_b$ ), 1.81 (s, 3H,  $\text{C}_{12/13}\text{H}_3$ ), 1.80 (s, 3H,  $\text{C}_{15/16}\text{H}_3$ ), 1.77 (s, 3H,  $\text{C}_{12/13}\text{H}_3$ ), 1.71 (s, 3H,  $\text{C}_{15/16}\text{H}_3$ ), 1.45 (s, 9H,  $\text{NCO}_2\text{C}(\text{CH}_3)_3$ ).

$^{13}\text{C}$  NMR (125.8 MHz,  $\text{CDCl}_3$ ,  $20\text{ }^{\circ}\text{C}$ ):  $\delta$  155.0 ( $\text{NCO}_2\text{C}(\text{CH}_3)_3$ ), 150.0 ( $\text{C}_{7a}$ ), 149.1 ( $\text{C}_{17/20}$ ), 148.4 ( $\text{C}_{17/20}$ ), 143.1 ( $\text{C}_4$ ), 134.0 ( $\text{C}_{11}$ ), 130.7 ( $\text{C}_6$ ), 128.6 ( $\text{C}_{18}$ ), 124.2 ( $\text{C}_{10}$ ), 123.3 ( $\text{C}_{19}$ ), 122.0 ( $\text{C}_{4a}$ ),

119.7 (C<sub>5</sub>), 108.6 (C<sub>7</sub>), 103.6 (C<sub>8a</sub>), 100.5 (C<sub>14</sub>),  
80.0 (NCO<sub>2</sub>C(CH<sub>3</sub>)<sub>3</sub>), 76.9 (C<sub>3a</sub>), 58.4 (C<sub>9</sub>), 42.7  
(C<sub>2</sub>), 39.5 (C<sub>3</sub>), 32.1 (C<sub>15/16</sub>), 28.8 (NCO<sub>2</sub>C(CH<sub>3</sub>)<sub>3</sub>),  
28.3 (C<sub>15/16</sub>), 26.0 (C<sub>12/13</sub>), 18.8 (C<sub>12/13</sub>).

FTIR (thin film) cm<sup>-1</sup>: 3311 (br-w), 2977 (m), 1685 (s), 1530 (s), 1350 (s).

HRMS (ESI) (*m/z*): calc'd for C<sub>29</sub>H<sub>37</sub>N<sub>4</sub>O<sub>7</sub>S [M+H]<sup>+</sup>: 585.2377,  
found: 585.2394.

[α]<sub>D</sub><sup>24</sup>: -109 (*c* = 0.58, CH<sub>2</sub>Cl<sub>2</sub>).

TLC (20% ethyl acetate in hexanes), *R<sub>f</sub>*: 0.17 (UV, CAM).

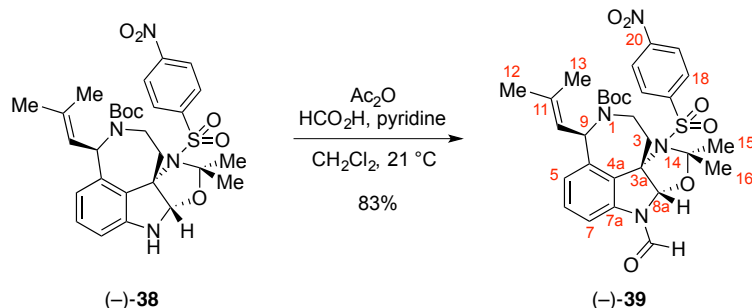

### Formamide (-)-39:

A mixture of acetic anhydride (3.20 mL, 34.0 mmol, 10.0 equiv) and formic acid (1.30 mL, 34.0 mmol, 10.0 equiv) was added to a solution of indoline (-)-38 (1.98 g, 3.38 mmol, 1 equiv) and pyridine (274  $\mu\text{L}$ , 3.39 mmol, 1.00 equiv) in dichloromethane (13.5 mL) at 0  $^\circ\text{C}$ .<sup>10</sup> The reaction mixture was warmed to 21  $^\circ\text{C}$  and stirred vigorously. After 2 h, a saturated aqueous sodium bicarbonate solution (80 mL) was slowly introduced and the resulting mixture was stirred vigorously for 1 h, at which time gas evolution had ceased. The layers were separated and the aqueous layer was extracted with dichloromethane (3  $\times$  40 mL). The combined organic extracts were dried over anhydrous sodium sulfate, were filtered, and were concentrated under reduced pressure to give a light yellow solid. Purification by flash column chromatography on silica gel (eluent: 10% $\rightarrow$ 40% ethyl acetate in hexanes) afforded formamide (-)-39 as a light yellow solid. This solid was suspended in hexanes (60 mL) and was filtered to provide formamide (-)-39 (1.72 g, 83.1%) as a white solid. Structural assignments were made using additional information from gCOSY, HSQC, and HMBC experiments.

<sup>1</sup>H NMR (500 MHz, CDCl<sub>3</sub>, 20  $^\circ\text{C}$ ):

$\delta$  8.51, (s, 1H, CHO), 7.90 (d,  $J$  = 8.8 Hz, 2H, C<sub>19</sub>H<sub>2</sub>), 7.87 (d,  $J$  = 7.9 Hz, 1H, C<sub>7</sub>H), 7.20 (app-t,  $J$  = 8.0 Hz, 1H, C<sub>6</sub>H), 7.08 (d,  $J$  = 8.4 Hz, 2H, C<sub>18</sub>H<sub>2</sub>), 6.74 (d,  $J$  = 8.1 Hz, 1H, C<sub>5</sub>H), 6.01 (d,  $J$  = 8.5 Hz, 1H, C<sub>9</sub>H), 5.81 (s, 1H, C<sub>8a</sub>H), 5.25 (d,  $J$  = 9.5 Hz, 1H, C<sub>10</sub>H), 3.89 (d,  $J$  = 13.4 Hz, 1H, C<sub>2</sub>H<sub>a</sub>), 3.16 (ddd,  $J$  = 13.6, 11.3, 1.9 Hz, 1H, C<sub>2</sub>H<sub>b</sub>), 3.00 (ddd,  $J$  = 14.6, 11.5, 2.8 Hz, 1H, C<sub>3</sub>H<sub>a</sub>), 2.39 (d,  $J$  = 16.5 Hz, 1H, C<sub>3</sub>H<sub>b</sub>), 1.86 (s, 3H, C<sub>15/16</sub>H<sub>3</sub>), 1.85 (s, 3H, C<sub>12/13</sub>H<sub>3</sub>), 1.76 (s, 3H, C<sub>12/13</sub>H<sub>3</sub>), 1.62 (s, 3H, C<sub>15/16</sub>H<sub>3</sub>), 1.47 (s, 9H, NCO<sub>2</sub>C(CH<sub>3</sub>)<sub>3</sub>).

<sup>13</sup>C NMR (125.8 MHz, CDCl<sub>3</sub>, 20  $^\circ\text{C}$ ):

$\delta$  160.0 (CHO), 154.7 (NCO<sub>2</sub>C(CH<sub>3</sub>)<sub>3</sub>), 149.4 (C<sub>17/20</sub>), 147.5 (C<sub>17/20</sub>), 143.2 (C<sub>4</sub>), 141.6 (C<sub>7a</sub>), 134.5 (C<sub>11</sub>), 131.1 (C<sub>6</sub>), 128.3 (C<sub>18</sub>), 125.0 (C<sub>5</sub>), 124.0 (C<sub>10</sub>), 123.6 (C<sub>19</sub>), 123.4 (C<sub>4a</sub>), 114.3 (C<sub>7</sub>), 102.0 (C<sub>14</sub>), 100.1 (C<sub>8a</sub>), 80.4 (NCO<sub>2</sub>C(CH<sub>3</sub>)<sub>3</sub>), 75.9 (C<sub>3a</sub>), 58.2 (C<sub>9</sub>), 42.0 (C<sub>2</sub>), 38.6 (C<sub>3</sub>), 31.7 (C<sub>15/16</sub>), 28.8 (NCO<sub>2</sub>C(CH<sub>3</sub>)<sub>3</sub>), 28.7 (C<sub>15/16</sub>), 26.0 (C<sub>12/13</sub>), 18.9 (C<sub>12/13</sub>).

<sup>10</sup> The mixture of acetic anhydride and formic acid was aged at 21  $^\circ\text{C}$  for 20 min before it was added to the reaction mixture.

|                                             |                                                                                                                             |
|---------------------------------------------|-----------------------------------------------------------------------------------------------------------------------------|
| FTIR (thin film) $\text{cm}^{-1}$ :         | 2978 (m), 1690 (s), 1531 (s), 1350 (s), 1166 (s).                                                                           |
| HRMS (ESI) ( $m/z$ ):                       | calc'd for $\text{C}_{30}\text{H}_{37}\text{N}_4\text{O}_8\text{S}$ $[\text{M}+\text{H}]^+$ : 613.2327,<br>found: 613.2318. |
| $[\alpha]_{\text{D}}^{24}$ :                | -87 ( $c = 0.51$ , $\text{CH}_2\text{Cl}_2$ ).                                                                              |
| TLC (40% ethyl acetate in hexanes), $R_f$ : | 0.33 (UV, CAM).                                                                                                             |



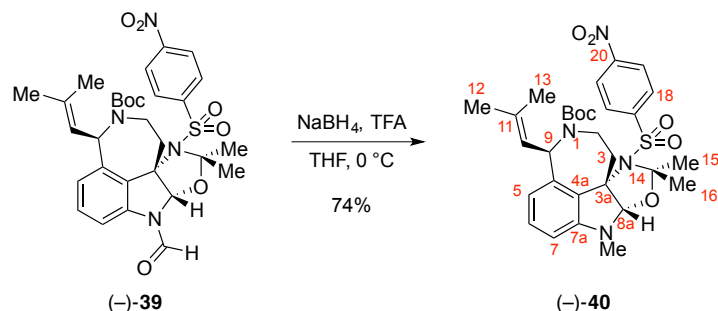

### N-Methyl indoline (-)-40:

A sample of sodium borohydride (643 mg, 16.6 mmol, 6.00 equiv) was added to a solution of formamide (-)-39 (1.70 g, 2.77 mmol, 1 equiv) in tetrahydrofuran (55 mL). The resulting suspension was cooled to 0 °C and trifluoroacetic acid (1.27 g, 16.6 mmol, 6.00 equiv) was then added. After stirring at this temperature for 1.5 h, excess sodium borohydride was quenched by slow addition of a saturated aqueous sodium bicarbonate solution (55 mL). The resulting white suspension was diluted with deionized water (55 mL) and was extracted with ethyl acetate (3 × 120 mL). The combined organic extracts were dried over anhydrous sodium sulfate, were filtered, and were concentrated under reduced pressure. The residue was purified by flash column chromatography on silica gel (eluent: 20% ethyl acetate in hexanes) to afford *N*-methyl indoline (-)-40 (1.22 g, 73.5%) as a yellow solid. Structural assignments were made using additional information from gCOSY, HSQC, and HMBC experiments.

<sup>1</sup>H NMR (500 MHz, CDCl<sub>3</sub>, 20 °C):

δ 7.86 (d, *J* = 9.0 Hz, 2H, C<sub>19</sub>H<sub>2</sub>), 7.16 (d, *J* = 9.1 Hz, 2H, C<sub>18</sub>H<sub>2</sub>), 7.08 (app-t, *J* = 7.9 Hz, 1H, C<sub>6</sub>H), 6.43 (d, *J* = 7.9 Hz, 1H, C<sub>5</sub>H), 6.16 (d, *J* = 7.8 Hz, 1H, C<sub>7</sub>H), 5.96 (d, *J* = 6.7 Hz, 1H, C<sub>9</sub>H), 5.30 (d, *J* = 9.4 Hz, 1H, C<sub>10</sub>H), 4.91 (s, 1H, C<sub>8a</sub>H), 3.85 (d, *J* = 11.4 Hz, 1H, C<sub>2</sub>H<sub>a</sub>), 3.19 (app-t, *J* = 12.5 Hz, 1H, C<sub>2</sub>H<sub>b</sub>), 2.88 (ddd, *J* = 14.6, 10.9, 3.1 Hz, 1H, C<sub>3</sub>H<sub>a</sub>), 2.61 (s, 3H, NCH<sub>3</sub>), 2.23 (d, *J* = 16.3 Hz, 1H, C<sub>3</sub>H<sub>b</sub>), 1.82 (s, 6H, C<sub>12/13</sub>H<sub>3</sub>, C<sub>15/16</sub>H<sub>3</sub>), 1.76 (s, 3H, C<sub>12/13</sub>H<sub>3</sub>), 1.62 (s, 3H, C<sub>15/16</sub>H<sub>3</sub>), 1.46 (s, 9H, NCO<sub>2</sub>C(CH<sub>3</sub>)<sub>3</sub>).

<sup>13</sup>C NMR (125.8 MHz, CDCl<sub>3</sub>, 20 °C):

δ 155.0 (NCO<sub>2</sub>C(CH<sub>3</sub>)<sub>3</sub>), 151.7 (C<sub>7a</sub>), 149.1 (C<sub>17/20</sub>), 148.4 (C<sub>17/20</sub>), 142.7 (C<sub>4</sub>), 133.8 (C<sub>11</sub>), 130.8 (C<sub>6</sub>), 128.6 (C<sub>18</sub>), 124.3 (C<sub>10</sub>), 123.2 (C<sub>19</sub>), 121.5 (C<sub>4a</sub>), 119.1 (C<sub>5</sub>), 108.6 (C<sub>8a</sub>), 106.1 (C<sub>7</sub>), 100.4 (C<sub>14</sub>), 80.0 (NCO<sub>2</sub>C(CH<sub>3</sub>)<sub>3</sub>), 75.8 (C<sub>3a</sub>), 58.3 (C<sub>9</sub>), 42.4 (C<sub>2</sub>), 39.4 (C<sub>3</sub>), 32.0 (NCH<sub>3</sub>), 31.8 (C<sub>15/16</sub>), 28.8 (NCO<sub>2</sub>C(CH<sub>3</sub>)<sub>3</sub>), 28.0 (C<sub>15/16</sub>), 26.0 (C<sub>12/13</sub>), 18.8 (C<sub>12/13</sub>).

FTIR (thin film) cm<sup>-1</sup>:

2978 (m), 1685 (s), 1530 (s), 1349 (s), 1163 (s).

HRMS (ESI) ( $m/z$ ): calc'd for  $C_{30}H_{39}N_4O_7S$   $[M+H]^+$ : 599.2534,  
found: 599.2558.

$[\alpha]_D^{24}$ :  $-55$  ( $c = 0.54$ ,  $CH_2Cl_2$ ).

TLC (20% acetone in hexanes),  $R_f$ : 0.32 (UV, CAM).

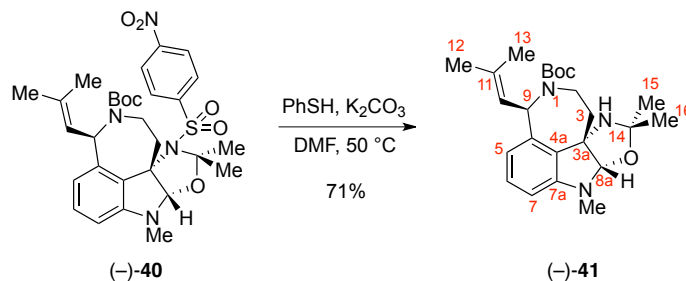

### Hemiaminal (-)-41:

Thiophenol (1.0 mL, 10 mmol, 10 equiv) was added to a mixture of *N*-methyl indoline (-)-40 (0.620 g, 1.00 mmol, 1 equiv) and potassium carbonate (1.43 g, 10.4 mmol, 10.0 equiv) in dimethylformamide (10.4 mL) and the resulting brown suspension was heated to 50 °C. After 2 h, the reaction mixture was cooled to 21 °C, was diluted with deionized water (100 mL), and was extracted with diethyl ether (4 × 100 mL). The combined organic extracts were dried over anhydrous sodium sulfate, were filtered, and were concentrated under reduced pressure. The residue was purified by flash column chromatography on silica gel (eluent: 10%→20% ethyl acetate in hexanes). A second chromatographic purification on silica gel (eluent: 0%→10% ethyl acetate in dichloromethane) followed by azeotropic drying of the sticky foam with toluene furnished hemiaminal (-)-41 (304 mg, 70.9%) as a white solid. Structural assignments were made using additional information from gCOSY, HSQC, and HMBC experiments.

$^1\text{H NMR}$  (500 MHz,  $\text{CD}_3\text{CN}$ , 70 °C):  $\delta$  7.07 (app-t,  $J = 7.8$  Hz, 1H,  $\text{C}_6\text{H}$ ), 6.45 (app-s, 1H,  $\text{C}_5\text{H}$ ), 6.45 (d,  $J = 7.8$  Hz, 1H,  $\text{C}_7\text{H}$ ), 5.99 (app-s, 1H,  $\text{C}_9\text{H}$ ), 5.44 (app-br-s, 1H,  $\text{C}_{10}\text{H}$ ), 5.01 (s, 1H,  $\text{C}_{8a}\text{H}$ ), 3.70 (app-s, 1H,  $\text{C}_2\text{H}_a$ ), 3.13 (app-br-s, 1H,  $\text{C}_2\text{H}_b$ ), 2.88 (s, 3H,  $\text{NCH}_3$ ), 2.47–2.09 (br-m, 1H,  $\text{C}_3\text{H}_a$ ), 1.99 (app-dt,  $J = 10.9, 6.1$  Hz, 1H,  $\text{C}_3\text{H}_b$ ), 1.83 (s, 3H,  $\text{C}_{12/13}\text{H}_3$ ), 1.77 (s, 3H,  $\text{C}_{12/13}\text{H}_3$ ), 1.44 (s, 9H,  $\text{NCO}_2\text{C}(\text{CH}_3)_3$ ), 1.40 (s, 3H,  $\text{C}_{15/16}\text{H}_3$ ), 0.97 (s, 3H,  $\text{C}_{15/16}\text{H}_3$ ).

$^1\text{H NMR}$  (500 MHz,  $\text{CD}_3\text{CN}$ , 20 °C, a mixture of conformers):  $\delta$  7.07 (app-t,  $J = 7.7$  Hz, 1H,  $\text{C}_6\text{H}$ ), 6.38 (d,  $J = 7.8$  Hz, 1H,  $\text{C}_5\text{H}$ ), 6.35–6.25 (app-m, 1H,  $\text{C}_7\text{H}$ ), 6.01 (d,  $J = 9.2$  Hz, 1H,  $\text{C}_9\text{H}$ ), 5.21 (d,  $J = 9.2$  Hz, 1H,  $\text{C}_{10}\text{H}$ ), 5.01 (s, 0.46H,  $\text{C}_{8a}\text{H}$ ), 4.95 (s, 0.54H,  $\text{C}_{8a}\text{H}$ ), 4.11 (s, 1H,  $\text{NH}$ ), 3.68 (dd, 0.46H,  $\text{C}_2\text{H}_a$ ), 3.64–3.42 (m, 0.54H,  $\text{C}_2\text{H}_a$ ), 2.98–2.88 (m, 1H,  $\text{C}_2\text{H}_b$ ), 2.85 (s, 3H,  $\text{NCH}_3$ ), 2.45–2.22 (br-m, 1H,  $\text{C}_3\text{H}_a$ ), 1.98–1.95 (m, 1H,  $\text{C}_3\text{H}_b$ ), 1.82 (s, 3H,  $\text{C}_{12/13}\text{H}_3$ ), 1.80 (s, 3H,  $\text{C}_{12/13}\text{H}_3$ ), 1.60–1.25 (s, 9H,  $\text{NCO}_2\text{C}(\text{CH}_3)_3$ ),  $\text{C}_{15/16}\text{H}_3$ ), 0.95 (s, 1.38H,  $\text{C}_{15/16}\text{H}_3$ ), 0.87 (s, 1.62H,  $\text{C}_{15/16}\text{H}_3$ ).

$^{13}\text{C}$  NMR (125.8 MHz,  $\text{CDCl}_3$ , 20 °C, a mixture of conformers):

$\delta$  156.8, 156.2 ( $\text{NCO}_2\text{C}(\text{CH}_3)_3$ ), 151.6 ( $\text{C}_{7a}$ ), 139.4 ( $\text{C}_4$ ), 139.0, 135.9 ( $\text{C}_{11}$ ), 135.2, 130.7 ( $\text{C}_6$ ), 129.8, 129.6 ( $\text{C}_{4a}$ ), 129.2, 124.9 ( $\text{C}_{10}$ ), 124.8, 124.1, 117.5 ( $\text{C}_7$ ), 105.8 ( $\text{C}_5$ ), 103.5 ( $\text{C}_{8a}$ ), 103.0, 97.6 ( $\text{C}_{14}$ ), 80.2, 80.0 ( $\text{NCO}_2\text{C}(\text{CH}_3)_3$ ), 76.0, 74.2, 74.1 ( $\text{C}_{3a}$ ), 58.7, 57.8 ( $\text{C}_9$ ), 50.2, 41.0 ( $\text{C}_2$ ), 40.5, 37.4 ( $\text{C}_3$ ), 37.0, 31.8 ( $\text{NCH}_3$ ), 31.7, 30.0, 29.9, 29.4, 29.2, 29.1 ( $\text{NCO}_2\text{C}(\text{CH}_3)_3$ ,  $\text{C}_{15}$ ,  $\text{C}_{16}$ ), 26.2 ( $\text{C}_{12/13}$ ), 18.9, 18.8 ( $\text{C}_{12/13}$ ).

FTIR (thin film)  $\text{cm}^{-1}$ :

2975 (m), 1687 (s), 1597 (m), 1477 (s), 1175 (s).

HRMS (ESI) ( $m/z$ ):

calc'd for  $\text{C}_{24}\text{H}_{36}\text{N}_3\text{O}_3$   $[\text{M}+\text{H}]^+$ : 414.2751,  
found: 414.2760

$[\alpha]_{\text{D}}^{24}$ :

-130 ( $c = 0.54$ ,  $\text{CH}_2\text{Cl}_2$ ).

TLC (15% ethyl acetate in hexanes),  $R_f$ :

0.13 (UV, CAM).

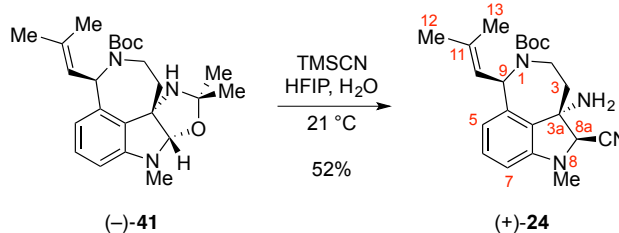

### Tricyclic amine (+)-24:

**CAUTION!** Trimethylsilyl cyanide is very toxic and should only be used with great caution.<sup>11</sup> A pressure tube containing hemiaminal (-)-41 (62 mg, 0.15 mmol, 1 equiv) was cooled to 0 °C and was charged sequentially with trimethylsilyl cyanide (58  $\mu$ L, 0.45 mmol, 3.0 equiv), anhydrous hexafluoroisopropanol (58  $\mu$ L, 0.54 mmol, 3.6 equiv), and water (8.1  $\mu$ L, 0.45 mmol, 3.0 equiv). The mixture was warmed to 21 °C and the tube was quickly sealed under an argon atmosphere. After 10 days, an aqueous sodium hydroxide solution (1 N, 1.5 mL) was introduced and the resulting mixture was extracted with dichloromethane (3  $\times$  2 mL). The combined organic extracts were dried over anhydrous sodium sulfate, were filtered, and were concentrated under reduced pressure. The residue was purified by flash column chromatography on silica gel (eluent: 10% $\rightarrow$ 30% ethyl acetate in hexanes) to afford tricyclic amine (+)-24 (30.0 mg, 52.3%, Rf: 0.23; 50% ethyl acetate in hexanes) as a white foam and the C8a-epimer (15.0 mg, 26.1%, Rf: 0.85; 50% ethyl acetate in hexanes) as a white foam.

As a result of the slow conformational equilibration at ambient temperature, NMR spectra were collected at elevated temperature. Structural assignments were made using additional information from gCOSY, HSQC, and HMBC experiments also collected at elevated temperature.

<sup>1</sup>H NMR (500 MHz, CD<sub>3</sub>CN, 60 °C):  $\delta$  7.14 (app-t,  $J$  = 7.8 Hz, 1H, C<sub>6</sub>H), 6.62 (d,  $J$  = 7.7 Hz, 1H, C<sub>5</sub>H), 6.54 (d,  $J$  = 7.8 Hz, 1H, C<sub>7</sub>H), 5.91 (br-s, 1H, C<sub>9</sub>H), 5.43 (s, 1H, C<sub>10</sub>H), 4.23 (s, 1H, C<sub>8a</sub>H), 4.08 (br-s, 1H, C<sub>2</sub>H<sub>a</sub>), 3.39 (br-s, 1H, C<sub>2</sub>H<sub>b</sub>), 2.87 (s, 3H, N<sub>8</sub>CH<sub>3</sub>), 2.35 (ddd,  $J$  = 14.4, 9.8, 6.5 Hz, 1H, C<sub>3</sub>H<sub>a</sub>), 2.16 (ddd,  $J$  = 13.8, 5.9, 3.4 Hz, 1H, C<sub>3</sub>H<sub>b</sub>), 1.80 (s, 3H, C<sub>12/13</sub>H<sub>3</sub>), 1.73 (s, 3H, C<sub>12/13</sub>H<sub>3</sub>), 1.36 (s, 9H, N<sub>1</sub>CO<sub>2</sub>C(CH<sub>3</sub>)<sub>3</sub>).

<sup>13</sup>C NMR (125.8 MHz, CD<sub>3</sub>CN, 60 °C):  $\delta$  156.8 (N<sub>1</sub>CO<sub>2</sub>C(CH<sub>3</sub>)<sub>3</sub>), 152.0 (C<sub>7a</sub>), 142.4 (C<sub>4</sub>), 138.6 (C<sub>11</sub>), 132.9 (C<sub>4a</sub>), 130.9 (C<sub>6</sub>), 124.3 (C<sub>10</sub>), 120.0 (C<sub>5</sub>), 117.9 (CN), 108.9 (C<sub>7</sub>), 81.3 (N<sub>1</sub>CO<sub>2</sub>C(CH<sub>3</sub>)<sub>3</sub>), 73.2 (C<sub>8a</sub>), 64.8 (C<sub>3a</sub>), 58.8 (C<sub>9</sub>), 42.4 (C<sub>2</sub>), 36.3 (C<sub>3</sub>), 34.7 (N<sub>8</sub>CH<sub>3</sub>), 29.4 (N<sub>1</sub>CO<sub>2</sub>C(CH<sub>3</sub>)<sub>3</sub>), 26.3 (C<sub>12/13</sub>), 19.2 (C<sub>12/13</sub>).

FTIR (thin film) cm<sup>-1</sup>: 3380 (w), 2974 (m), 1686 (s), 1598 (m), 1451 (m).

<sup>11</sup> All operations involving trimethylsilyl cyanide were carried out in a well-ventilated fume hood. This includes but is not limited to: measuring the reagent, execution of the transformation, work-up of the reaction mixture, and concentration of the crude reaction mixture.

HRMS (ESI) ( $m/z$ ): calc'd for  $C_{22}H_{31}N_4O_2$   $[M+H]^+$ : 383.2442,  
found: 383.2462.

$[\alpha]_D^{24}$ : +27 ( $c = 0.54$ ,  $CH_2Cl_2$ ).

TLC (33% acetone in hexanes),  $R_f$ : 0.40 (UV, CAM).

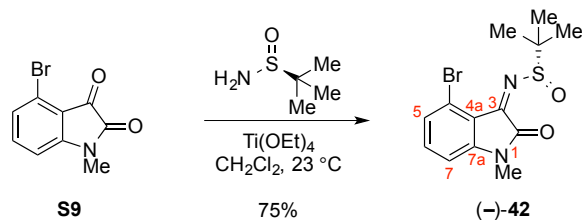

### **tert-Butylsulfonimine (-)-42:**

Titanium ethoxide (37.1 mL, 180 mmol, 2.20 equiv) was added dropwise via syringe to a stirred solution of (*S*)-(-)-2-methyl-2-propanesulfonamide (11.9 g, 98.2 mmol, 1.20 equiv) and 4-bromo-1-methylisatin<sup>12</sup> (**S9**, 19.6 g, 81.8 mmol, 1 equiv) in dichloromethane (169 mL) at 23 °C. After 26 h, the reaction mixture was diluted with dichloromethane (150 mL) and deionized water (6.5 mL) was added dropwise over 3 min with vigorous stirring. The resulting red gel was diluted with an additional portion of dichloromethane (150 mL) and then manually agitated to break up the gel. After stirring for an additional 10 min, dry Celite (45 g, oven-dried at 160 °C for 2 weeks) was added and the resulting suspension was then concentrated under reduced pressure until a free flowing orange powder was obtained. The Celite-adsorbed crude mixture was purified via flash chromatography on silica gel (eluent: 5%→75% ethyl acetate in dichloromethane) to yield *tert*-butylsulfonimine (-)-**42** (21.0 g, 74.8%) as a dark-red solid. Structural assignments were made using additional information from gCOSY, HSQC, and HMBC experiments.

<sup>1</sup>H NMR (500 MHz, CDCl<sub>3</sub>, 20 °C): δ 7.31 (dd, *J* = 7.5, 8.2 Hz, 1H, C<sub>6</sub>H), 7.26 (dd, *J* = 1.0, 8.2 Hz, 1H, C<sub>5</sub>H), 6.80 (dd, *J* = 1.0, 7.7 Hz, 1H, C<sub>7</sub>H), 3.23 (s, 3H, N<sub>1</sub>CH<sub>3</sub>), 1.37 (s, 9H, C(CH<sub>3</sub>)<sub>3</sub>).

<sup>13</sup>C NMR (125.8 MHz, CDCl<sub>3</sub>, 20 °C): δ 160.3 (C<sub>3</sub>), 156.9 (C<sub>2</sub>), 149.5 (C<sub>7a</sub>), 135.7 (C<sub>6</sub>), 128.8 (C<sub>5</sub>), 120.9 (C<sub>4</sub>), 118.2 (C<sub>4a</sub>), 108.2 (C<sub>7</sub>), 58.3 (C(CH<sub>3</sub>)<sub>3</sub>), 26.6 (N<sub>1</sub>CH<sub>3</sub>), 22.4 (C(CH<sub>3</sub>)<sub>3</sub>).

FTIR (thin film) cm<sup>-1</sup>: 3083 (w), 2959 (w), 1732 (s), 1594 (s), 1454 (m).

HRMS (ESI) (*m/z*): calc'd for C<sub>13</sub>H<sub>16</sub>BrN<sub>2</sub>O<sub>2</sub>S [M+H]<sup>+</sup>: 343.0110, found: 343.0112.

[α]<sub>D</sub><sup>24</sup>: -616 (*c* = 0.25, CH<sub>2</sub>Cl<sub>2</sub>).

TLC (15% ethyl acetate in dichloromethane), R<sub>f</sub>: 0.21 (UV, CAM).

<sup>12</sup> Sin, N.; Venables, B. L.; Liu, X.; Huang, S.; Gao, Q.; Ng, A.; Dalterio, R.; Rajamani, R.; Meanwell, N. A. *J. Heterocyclic Chem.* **2009**, *46*, 432.

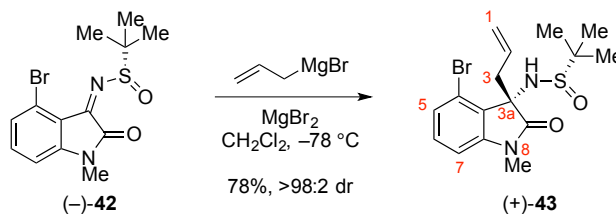

### Allyl Oxindole (+)-43:

A 1 L, 3-neck round-bottom flask equipped with a stir bar, a low-temperature thermometer fitted into a thermometer adapter, a graduated, pressure-equalizing addition funnel, and a rubber septum was charged with magnesium bromide (25.1 g, 136 mmol, 2.00 equiv) and *tert*-butylsulfinimine (-)-**42** (24.3 g, 68.2 mmol, 1 equiv). The flask was then evacuated and backfilled with argon (three cycles). Dichloromethane (400 mL) was added and the resulting red suspension was cooled to  $-78^\circ\text{C}$ . The addition funnel was then charged with a solution of allylmagnesium bromide (0.955 M in diethyl ether, 78.5 mL, 75.0 mmol, 1.10 equiv) and dropwise addition began at a rate such that the internal temperature of the reaction mixture did not exceed  $-75^\circ\text{C}$  (*ca.* 2 mL/min). After stirring for 1.5 h, a saturated aqueous ammonium chloride solution (300 mL) was added to the bright yellow suspension and the mixture was allowed to warm to  $23^\circ\text{C}$  with vigorous stirring. The resulting biphasic mixture was diluted with deionized water (150 mL) and the layers were separated. The aqueous layer was extracted with dichloromethane ( $3 \times 200$  mL) and the combined organic extracts were washed with a saturated aqueous sodium chloride solution (400 mL), were dried over anhydrous sodium sulfate, were filtered, and were concentrated under reduced pressure to afford crude allyl oxindole (+)-**43** (26.7 g, 86:14 dr) as an orange solid. Purification and enrichment of the diastereomeric ratio were achieved by triturating the crude product with *n*-hexane (200 mL) and washing with additional portions of *n*-hexane (500 mL total) to afford pure allyl oxindole (+)-**43** (20.6 g, 78.3%, >98:2 dr) as a light orange solid, which was used in the next step without further purification. Structural assignment of the major diastereomer was made using additional information from gCOSY, HSQC, and HMBC experiments.

$^1\text{H}$  NMR (500 MHz,  $\text{CDCl}_3$ ,  $20^\circ\text{C}$ ):  $\delta$  7.18–7.15 (m, 2H,  $\text{C}_6\text{H}$ ,  $\text{C}_5\text{H}$ ), 6.75 (dd,  $J = 3.0, 5.6$  Hz, 1H,  $\text{C}_7\text{H}$ ), 5.23 (app-dt,  $J = 7.0, 10.1, 17.0$  Hz, 1H,  $\text{C}_2\text{H}$ ), 5.05 (app-dq,  $J = 1.2, 16.4$  Hz, 1H,  $\text{C}_1\text{H}_a$ ), 4.89 (dd,  $J = 1.9, 10.1$  Hz, 1H,  $\text{C}_1\text{H}_b$ ), 4.13 (s, 1H,  $\text{NH}$ ), 3.17 (s, 3H,  $\text{N}_8\text{CH}_3$ ), 3.10 (dd,  $J = 6.9, 13.0$  Hz, 1H,  $\text{C}_3\text{H}_a$ ), 2.84 (dd,  $J = 7.7, 13.0$  Hz, 1H,  $\text{C}_3\text{H}_b$ ), 1.20 (s, 9H,  $\text{C}(\text{CH}_3)_3$ ).

$^{13}\text{C}$  NMR (125.8 MHz,  $\text{CDCl}_3$ ,  $20^\circ\text{C}$ ):  $\delta$  174.1 ( $\text{C}_{8a}$ ), 145.2 ( $\text{C}_{7a}$ ), 131.1 ( $\text{C}_6$ ), 129.7 ( $\text{C}_2$ ), 127.6 ( $\text{C}_4$ ), 127.2 ( $\text{C}_5$ ), 120.5 ( $\text{C}_1$ ), 119.9 ( $\text{C}_{4a}$ ), 107.7 ( $\text{C}_7$ ), 66.5 ( $\text{C}_{3a}$ ), 57.0 ( $\text{C}(\text{CH}_3)_3$ ), 39.9 ( $\text{C}_3$ ), 26.6 ( $\text{N}_8\text{CH}_3$ ), 22.5 ( $\text{C}(\text{CH}_3)_3$ ).

FTIR (thin film)  $\text{cm}^{-1}$ : 3249 (s), 2958 (w), 1720 (s), 1602 (s), 1456 (m).

HRMS (ESI) ( $m/z$ ): calc'd for  $\text{C}_{16}\text{H}_{22}\text{BrN}_2\text{O}_2\text{S} [\text{M}+\text{H}]^+$ : 385.0580, found: 385.0592.



$[\alpha]_D^{24}$ : +31 ( $c = 1.8$ ,  $\text{CH}_2\text{Cl}_2$ ).

TLC (33% acetone in hexanes),  $R_f$ : 0.24 (UV, CAM).

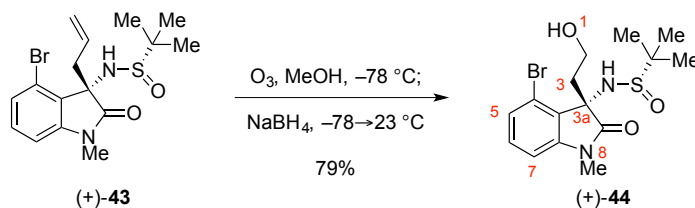

### Alcohol (+)-44:

Ozone was bubbled through a solution of allyl oxindole (+)-**43** (20.4 g, 52.9 mmol, 1 equiv) in methanol (300 mL) cooled to  $-78\text{ }^{\circ}\text{C}$ . After 3 h, ozone bubbling was ceased and the solution was sparged with nitrogen. After 40 min, nitrogen bubbling was ceased, solid sodium borohydride (6.40 g, 169 mmol, 3.20 equiv) was added to the solution in portions over 15 min, and the resulting mixture was allowed to warm to  $23\text{ }^{\circ}\text{C}$ . After 1 h, a saturated aqueous ammonium chloride solution (400 mL) was added and the mixture was extracted with dichloromethane ( $7 \times 300\text{ mL}$ ). The combined organic extracts were dried over anhydrous sodium sulfate, were filtered, and were concentrated under reduced pressure. The resulting residue was purified by flash column chromatography on silica gel (eluent: 10%  $\rightarrow$  40% acetone in dichloromethane) to afford a single diastereomer of alcohol (+)-**44** (16.3 g, 79.3%) as a pale-green solid. Structural assignments were made using additional information from gCOSY, HSQC, and HMBC experiments.

|                                                                                   |                                                                                                                                                                                                                                                                                                                                                                                                                                                                                                                                                                                                                |
|-----------------------------------------------------------------------------------|----------------------------------------------------------------------------------------------------------------------------------------------------------------------------------------------------------------------------------------------------------------------------------------------------------------------------------------------------------------------------------------------------------------------------------------------------------------------------------------------------------------------------------------------------------------------------------------------------------------|
| $^1\text{H}$ NMR (500 MHz, $\text{CDCl}_3$ , $20\text{ }^{\circ}\text{C}$ ):      | $\delta$ 7.17–7.13 (m, 2H, $\text{C}_6\text{H}$ , $\text{C}_5\text{H}$ ), 6.78 (dd, $J = 5.4, 3.3\text{ Hz}$ , 1H, $\text{C}_7\text{H}$ ), 4.29 (s, 1H, $\text{NH}(\text{S}(\text{O})\text{C}(\text{CH}_3)_3)$ ), 3.67 (app-dt, $J = 11.1, 5.4\text{ Hz}$ , 1H, $\text{C}_2\text{H}_a$ ), 3.44 (m, 1H, $\text{C}_2\text{H}_b$ ), 3.17 (s, 3H, $\text{N}_8\text{CH}_3$ ), 2.57 (ddd, $J = 14.1, 8.2, 5.2\text{ Hz}$ , 1H, $\text{C}_3\text{H}_a$ ), 2.50 (br-s, 1H, $\text{O}_1\text{H}$ ), 2.28 (ddd, $J = 14.3, 5.5, 4.9\text{ Hz}$ , 1H, $\text{C}_3\text{H}_b$ ), 1.17 (s, 9H, $\text{C}(\text{CH}_3)_3$ ). |
| $^{13}\text{C}$ NMR (125.8 MHz, $\text{CDCl}_3$ , $20\text{ }^{\circ}\text{C}$ ): | $\delta$ 175.3 ( $\text{C}_{8a}$ ), 144.9 ( $\text{C}_{7a}$ ), 131.2 ( $\text{C}_6$ ), 128.0 ( $\text{C}_4$ ), 127.3 ( $\text{C}_5$ ), 119.8 ( $\text{C}_{4a}$ ), 108.0 ( $\text{C}_7$ ), 65.3 ( $\text{C}_{3a}$ ), 58.1 ( $\text{C}_2$ ), 57.1 ( $\text{C}(\text{CH}_3)_3$ ), 38.2 ( $\text{C}_3$ ), 26.9 ( $\text{N}_8\text{CH}_3$ ), 22.4 ( $\text{C}(\text{CH}_3)_3$ ).                                                                                                                                                                                                                                    |
| FTIR (thin film) $\text{cm}^{-1}$ :                                               | 3392 (br-m), 2959 (w), 1725 (s), 1605 (s), 1457 (m).                                                                                                                                                                                                                                                                                                                                                                                                                                                                                                                                                           |
| HRMS (ESI) ( $m/z$ ):                                                             | calc'd for $\text{C}_{15}\text{H}_{22}\text{BrN}_2\text{O}_3\text{S}$ [ $\text{M}+\text{H}$ ] $^+$ : 389.0529, found: 389.0536.                                                                                                                                                                                                                                                                                                                                                                                                                                                                                |
| $[\alpha]_D^{24}$ :                                                               | +22 ( $c = 0.9$ , $\text{CH}_2\text{Cl}_2$ ).                                                                                                                                                                                                                                                                                                                                                                                                                                                                                                                                                                  |
| TLC (33% acetone in hexanes), $R_f$ :                                             | 0.18 (UV, CAM).                                                                                                                                                                                                                                                                                                                                                                                                                                                                                                                                                                                                |

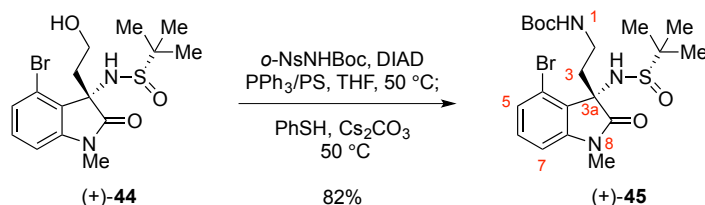

### Carbamate (+)-45:

Diisopropyl azodicarboxylate (DIAD, 5.94 mL, 30.2 mmol, 1.16 equiv) was added dropwise via syringe to a suspension of alcohol (+)-44 (10.1 g, 26.0 mmol, 1 equiv), *tert*-butyl ((2-nitrophenyl)sulfonyl)carbamate<sup>13</sup> (9.13 g, 30.2 mmol, 1.16 equiv), and resin-bound triphenylphosphine (1.49 mmol/g on 100-200 mesh polystyrene cross-linked with 1% divinylbenzene, 20.3 g, 30.2 mmol, 1.16 equiv) in tetrahydrofuran (202 mL) at 23 °C. The flask was fitted with a reflux condenser, was placed in a preheated 50 °C oil bath, and was allowed to stir gently. After 2.3 h, the mixture was allowed to cool (10 min) at which point cesium carbonate (33.9 g, 104 mmol, 4.00 equiv) and thiophenol (5.34 mL, 52.0 mmol, 2.00 equiv) were added. The flask was immersed in a pre-heated 50 °C oil bath and allowed to stir vigorously. After 4 h, the solution was allowed to cool to 23 °C, was diluted with dichloromethane (250 mL), and was charged with Celite (25 g). The mixture was concentrated under reduced pressure until a free flowing yellow powder was obtained. The Celite-adsorbed crude mixture was purified via flash chromatography on silica gel (eluent: 25%→40% acetone in hexanes) to afford carbamate (+)-45 (10.5 g, 82.4% yield) as an off-white solid. Structural assignments were made using additional information from gCOSY, HSQC, and HMBC experiments.

<sup>1</sup>H NMR (500 MHz, CDCl<sub>3</sub>, 20 °C): δ 7.17 (d, *J* = 3.7 Hz, 2H, C<sub>6</sub>H, C<sub>5</sub>H), 6.78 (app-t, *J* = 4.5 Hz, 1H, C<sub>7</sub>H), 4.47 (br-s, 1H, N<sub>1</sub>H), 4.18 (s, 1H, NH(S(O)C(CH<sub>3</sub>)<sub>3</sub>), 3.19 (s, 3H, N<sub>8</sub>CH<sub>3</sub>), 3.02–2.92 (m, 2H, C<sub>2</sub>H<sub>2</sub>), 2.45 (app-dt, *J* = 14.4, 7.2 Hz, 1H, C<sub>3</sub>H<sub>a</sub>), 2.38 (app-dt, *J* = 13.1, 6.4 Hz, 1H, C<sub>3</sub>H<sub>b</sub>), 1.34 (s, 9H, N<sub>1</sub>CO<sub>2</sub>C(CH<sub>3</sub>)<sub>3</sub>), 1.18 (s, 9H, NH(S(O)C(CH<sub>3</sub>)<sub>3</sub>).

<sup>13</sup>C NMR (125.8 MHz, CDCl<sub>3</sub>, 20 °C): δ 174.3 (C<sub>8a</sub>), 155.5 (N<sub>1</sub>CO<sub>2</sub>C(CH<sub>3</sub>)<sub>3</sub>), 144.9 (C<sub>7a</sub>), 131.4 (C<sub>6</sub>), 127.7 (C<sub>4</sub>), 127.4 (C<sub>5</sub>), 120.0 (C<sub>4a</sub>), 108.0 (C<sub>7</sub>), 79.4 (N<sub>1</sub>CO<sub>2</sub>C(CH<sub>3</sub>)<sub>3</sub>), 65.3 (C<sub>3a</sub>), 57.0 (S(O)C(CH<sub>3</sub>)<sub>3</sub>), 35.7 (C<sub>2/3</sub>), 35.6 (C<sub>2/3</sub>), 28.5 (N<sub>1</sub>CO<sub>2</sub>C(CH<sub>3</sub>)<sub>3</sub>), 26.8 (N<sub>8</sub>CH<sub>3</sub>), 22.4 (S(O)C(CH<sub>3</sub>)<sub>3</sub>).

FTIR (thin film) cm<sup>-1</sup>: 3255 (br-w), 2977 (w), 1718 (s), 1605 (m), 1457 (m), 1364 (w).

HRMS (ESI) (*m/z*): calc'd for C<sub>20</sub>H<sub>30</sub>BrN<sub>3</sub>NaO<sub>4</sub>S [M+Na]<sup>+</sup>: 510.1033, found: 510.1042.

<sup>13</sup> Fukuyama, T.; Cheung, M.; Kan, T. *Synlett*, **1999**, 1301.

$[\alpha]_D^{24}$ : +31 ( $c = 0.64$ ,  $\text{CH}_2\text{Cl}_2$ ).

TLC (50% acetone in hexanes),  $R_f$ : 0.41 (UV, CAM).

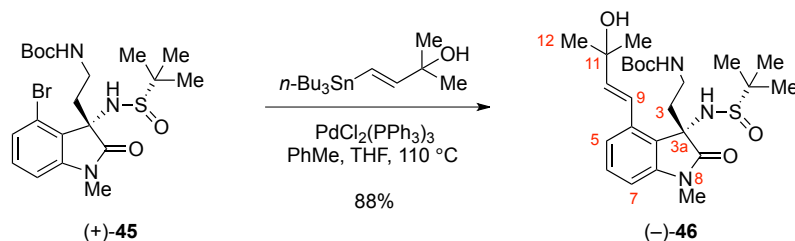

### Allylic Alcohol (-)-46:

A solution of freshly prepared (*E*)-2-methyl-4-(tri-*n*-butylstannyl)but-3-en-2-ol<sup>14</sup> (12.8 g, 34.2 mmol, 1.25 equiv) in tetrahydrofuran (68 mL) was added to a suspension of carbamate (+)-**45** (13.4 g, 27.4 mmol, 1 equiv) and bis(triphenylphosphine)palladium(II) dichloride (960 mg, 1.37 mmol, 0.0500 equiv) in toluene (137 mL) via cannula at 23 °C. The reaction vessel was sealed and placed in a preheated 110 °C oil bath. After 5 h, the mixture was allowed to cool to 23 °C and was filtered through a pad of silica gel covered with a pad of Celite. The filter cake was rinsed with a 50% solution of acetone in hexanes (600 mL) and the turbid brown filtrate was concentrated under reduced pressure. The resulting residue was purified by flash chromatography on silica gel (eluent: 37% dichloromethane, 37% hexanes, 25% acetone, 1% methanol→33% dichloromethane, 33% hexanes, 33% acetone, 1% methanol) to afford allylic alcohol (-)-**46** (11.8 g, 87.5%) as a faint yellow solid. Structural assignments were made using additional information from gCOSY, HSQC, and HMBC experiments.

<sup>1</sup>H NMR (500 MHz, CDCl<sub>3</sub>, 20 °C): δ 7.27 (t, *J* = 7.9 Hz, 1H, C<sub>6</sub>H), 7.18 (d, *J* = 7.9 Hz, 1H, C<sub>5</sub>H), 7.02 (d, *J* = 16.0 Hz, 1H, C<sub>9</sub>H), 6.68 (d, *J* = 7.6 Hz, 1H, C<sub>7</sub>H), 6.32 (d, *J* = 15.9 Hz, 1H, C<sub>10</sub>H), 4.58 (br-s, 1H, N<sub>1</sub>H), 4.08 (s, 1H, NH(S(O)C(CH<sub>3</sub>)<sub>3</sub>), 3.66 (br-s, 1H, OH), 3.17 (s, 3H, N<sub>8</sub>CH<sub>3</sub>), 2.90–2.77 (m, 1H, C<sub>2</sub>H<sub>a</sub>), 2.66–2.52 (m, 1H, C<sub>2</sub>H<sub>b</sub>), 2.46–2.35 (m, 2H, C<sub>3</sub>H<sub>2</sub>), 1.39 (s, 3H, C<sub>12</sub>H<sub>3</sub>), 1.37 (s, 3H, C<sub>12</sub>H<sub>3</sub>), 1.33 (s, 9H, N<sub>1</sub>CO<sub>2</sub>C(CH<sub>3</sub>)<sub>3</sub>), 1.14 (s, 9H, NH(S(O)C(CH<sub>3</sub>)<sub>3</sub>).

<sup>13</sup>C NMR (125.8 MHz, CDCl<sub>3</sub>, 20 °C): δ 176.0 (C<sub>8a</sub>), 155.8 (N<sub>1</sub>CO<sub>2</sub>C(CH<sub>3</sub>)<sub>3</sub>), 143.6 (C<sub>7a</sub>), 142.6 (C<sub>10</sub>), 136.6 (C<sub>4</sub>), 130.4 (C<sub>6</sub>), 123.9 (C<sub>4a</sub>), 122.4 (C<sub>9</sub>), 121.0 (C<sub>5</sub>), 107.4 (C<sub>7</sub>), 79.7 (N<sub>1</sub>CO<sub>2</sub>C(CH<sub>3</sub>)<sub>3</sub>), 70.8 (C<sub>11</sub>), 63.6 (C<sub>3a</sub>), 56.8 (S(O)C(CH<sub>3</sub>)<sub>3</sub>), 37.0 (C<sub>3</sub>), 36.1 (C<sub>2</sub>), 29.6 (C<sub>12</sub>), 29.4 (C<sub>12</sub>), 28.5 (N<sub>1</sub>CO<sub>2</sub>C(CH<sub>3</sub>)<sub>3</sub>), 26.7 (N<sub>8</sub>CH<sub>3</sub>), 22.6 (S(O)C(CH<sub>3</sub>)<sub>3</sub>).

FTIR (thin film) cm<sup>-1</sup>: 3344 (br-m), 2974 (m), 1716 (s), 1590 (m), 1521 (w), 1464 (m).

HRMS (ESI) (*m/z*): calc'd for C<sub>25</sub>H<sub>40</sub>N<sub>3</sub>O<sub>5</sub>S [M+H]<sup>+</sup>: 494.2683, found: 494.2671.

<sup>14</sup> Zhang, H. X.; Guibé, F. *J. Org. Chem.* **1990**, *55*, 1857.

$[\alpha]_{\text{D}}^{24}$ :  $-50$  ( $c = 1.6$ ,  $\text{CH}_2\text{Cl}_2$ ).

TLC (25% acetone, 1% methanol in hexanes),  $R_f$ : 0.35 (UV, CAM).

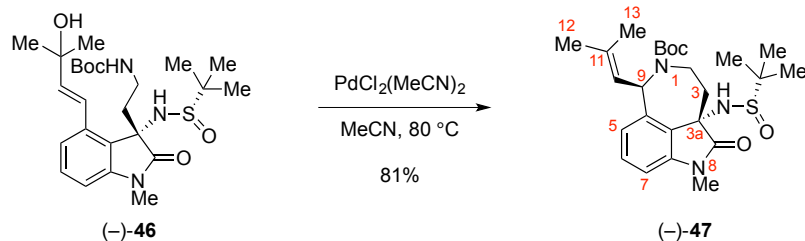

### Tricyclic Oxindole (-)-47:

A sample of bis(acetonitrile)dichloropalladium(II) (727 mg, 2.80 mmol, 0.120 equiv) was added to a solution of allylic alcohol (-)-46 (11.5 g, 23.4 mmol, 1 equiv) in acetonitrile (467 mL) at 23 °C. The reaction flask was fitted with a reflux condenser and placed in a preheated 80 °C oil bath. After 3 h, the homogeneous orange solution was allowed to cool to 23 °C and the flask was then charged with Celite (27 g). The suspension was concentrated under reduced pressure until a free-flowing orange powder was obtained. The Celite-adsorbed crude mixture was purified via flash chromatography on silica gel (eluent: 25%→30% acetone in hexanes) to afford tricyclic oxindole (-)-47 (8.96 g, 80.6%) as an off-white foam. Structural assignments were made using additional information from gCOSY, HSQC, and HMBC experiments.

$^1\text{H}$  NMR (500 MHz,  $\text{CDCl}_3$ , 20 °C, 2:1 mixture of atropisomers, \*denotes minor atropisomer):  $\delta$  7.25 (dd,  $J = 11.0, 4.8$  Hz, 1H,  $\text{C}_6\text{H}$ ), 6.88–6.66 (m, 2H,  $\text{C}_5\text{H}$ ,  $\text{C}_7\text{H}$ ), 6.12 (d,  $J = 8.7$  Hz, 1H,  $\text{C}_9\text{H}^*$ ), 6.02 (d,  $J = 7.6$  Hz, 1H,  $\text{C}_9\text{H}$ ), 5.12 (br-s, 1H,  $\text{C}_{10}\text{H}$ ), 4.05–3.88 (m, 2H,  $\text{NH}(\text{S}(\text{O})\text{C}(\text{CH}_3)_3)$ ,  $\text{C}_2\text{H}_a$ ), 3.85–3.77 (m, 2H,  $\text{NH}(\text{S}(\text{O})\text{C}(\text{CH}_3)_3^*$ ,  $\text{C}_2\text{H}_a^*$ ), 3.19 (s, 3H,  $\text{N}_8\text{CH}_3$ ), 3.17 (s, 3H,  $\text{N}_8\text{CH}_3^*$ ), 2.91 (br-s, 1H,  $\text{C}_2\text{H}_b$ ), 2.53 (br-s, 1H,  $\text{C}_3\text{H}_a$ ), 1.95–1.64 (m, 7H,  $\text{C}_3\text{H}_b$ ,  $\text{C}_{12}\text{H}_3$ ,  $\text{C}_{13}\text{H}_3$ ), 1.48 (s, 9H,  $\text{N}_1\text{CO}_2\text{C}(\text{CH}_3)_3^*$ ), 1.46 (s, 9H,  $\text{N}_1\text{CO}_2\text{C}(\text{CH}_3)_3$ ), 1.12 (s, 9H,  $\text{NH}(\text{S}(\text{O})\text{C}(\text{CH}_3)_3)$ ).

$^{13}\text{C}$  NMR (125.8 MHz,  $\text{CDCl}_3$ , 20 °C, 2:1 mixture of atropisomers, \*denotes minor atropisomer):  $\delta$  175.9 ( $\text{C}_{8a}$ ), 155.8 ( $\text{N}_1\text{CO}_2\text{C}(\text{CH}_3)_3$ ), 154.2 ( $\text{N}_1\text{CO}_2\text{C}(\text{CH}_3)_3^*$ ), 143.4 ( $\text{C}_{7a}$ ), 142.9 ( $\text{C}_{7a}^*$ ), 138.8 ( $\text{C}_4^*$ ), 138.5 ( $\text{C}_4$ ), 136.6 ( $\text{C}_{11}^*$ ), 135.3 ( $\text{C}_{11}$ ), 130.0 ( $\text{C}_6$ ), 126.1 ( $\text{C}_{4a}^*$ ), 125.8 ( $\text{C}_{4a}$ ), 122.9 ( $\text{C}_5^*$ ), 122.4 ( $\text{C}_5$ ), 121.93 ( $\text{C}_{10}$ ), 107.4 ( $\text{C}_7$ ), 80.7 ( $\text{N}_1\text{CO}_2\text{C}(\text{CH}_3)_3$ ), 80.2 ( $\text{N}_1\text{CO}_2\text{C}(\text{CH}_3)_3^*$ ), 63.3 ( $\text{C}_{3a}$ ), 63.1 ( $\text{C}_{3a}^*$ ), 58.5 ( $\text{C}_9$ ), 57.6 ( $\text{S}(\text{O})\text{C}(\text{CH}_3)_3^*$ ), 56.4 ( $\text{S}(\text{O})\text{C}(\text{CH}_3)_3$ ), 41.4 ( $\text{C}_2^*$ ), 40.8 ( $\text{C}_2$ ), 33.7 ( $\text{C}_3^*$ ), 32.8 ( $\text{C}_3$ ), 28.8 ( $\text{N}_1\text{CO}_2\text{C}(\text{CH}_3)_3$ ), 28.4 ( $\text{N}_1\text{CO}_2\text{C}(\text{CH}_3)_3^*$ ), 26.6 ( $\text{N}_8\text{CH}_3$ ), 26.0 ( $\text{C}_{12}^*$ ), 25.8 ( $\text{C}_{12}$ ), 22.5 ( $\text{S}(\text{O})\text{C}(\text{CH}_3)_3$ ), 19.0 ( $\text{C}_{13}$ ), 18.8 ( $\text{C}_{13}^*$ ).

FTIR (thin film)  $\text{cm}^{-1}$ : 3315 (br-w), 2974 (m), 1724 (s), 1610 (m), 1598 (m).

HRMS (ESI) ( $m/z$ ): calc'd for  $C_{25}H_{38}N_3O_4S$   $[M+H]^+$ : 476.2578,  
found: 476.2567.

$[\alpha]_D^{24}$ :  $-27$  ( $c = 0.57$ ,  $CH_2Cl_2$ ).

TLC (33% acetone in hexanes),  $R_f$ : 0.37 (UV, CAM).



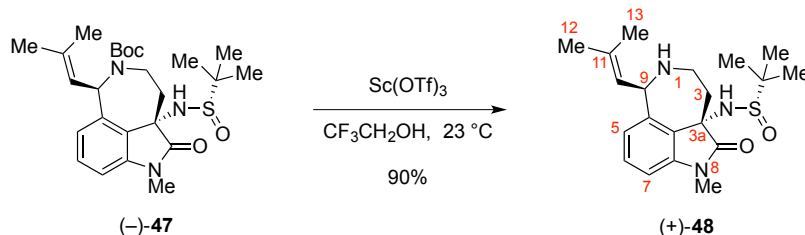

### Tricyclic Amine (+)-48:

A sample of scandium(III) trifluoromethanesulfonate (103 mg, 0.210 mmol, 2.00 equiv) was added to a solution of tricyclic oxindole (-)-47 (50.0 mg, 0.105 mmol, 1 equiv) in 2,2,2-trifluoroethanol (2 mL) at 23 °C. After 30 min, a saturated aqueous sodium bicarbonate solution (5 mL) was added and the mixture was extracted with dichloromethane (3 × 15 mL). The combined organic extracts were washed with a saturated aqueous sodium chloride solution (5 mL), were dried over anhydrous sodium sulfate, were filtered, and were concentrated under reduced pressure. The resulting residue was purified by flash column chromatography on silica gel (eluent: 5%→10% methanol in chloroform) to afford tricyclic amine (+)-48 (35.0 mg, 89.7%) as a white solid.

As a result of slow conformational equilibration at ambient temperature, NMR spectra were collected at elevated temperature. Structural assignments were made using additional information from gCOSY, HSQC, and HMBC experiments collected at elevated temperature.

$^1\text{H}$  NMR (500 MHz,  $\text{CD}_3\text{CN}$ , 60 °C):  $\delta$  7.25 (app-t,  $J = 7.9$  Hz, 1H,  $\text{C}_6\text{H}$ ), 6.86 (d,  $J = 8.0$  Hz, 1H,  $\text{C}_5\text{H}$ ), 6.81 (d,  $J = 7.8$  Hz, 1H,  $\text{C}_7\text{H}$ ), 5.30 (d,  $J = 8.7$  Hz, 1H,  $\text{C}_{10}\text{H}$ ), 5.09 (d,  $J = 8.7$  Hz, 1H,  $\text{C}_9\text{H}$ ), 4.94 (br-s, 1H,  $\text{NH}(\text{S}(\text{O})\text{C}(\text{CH}_3)_3)$ ), 3.58 (t,  $J = 11.3$  Hz, 1H,  $\text{C}_2\text{H}_a$ ), 3.20 (app-dt,  $J = 14.3, 4.3$  Hz, 1H,  $\text{C}_2\text{H}_b$ ), 3.14 (s, 3H,  $\text{N}_8\text{CH}_3$ ), 2.09 (ddd,  $J = 14.2, 4.1, 3.3$  Hz, 1H,  $\text{C}_3\text{H}_a$ ), 1.95 (br-s, 1H,  $\text{N}_1\text{H}$ ), 1.84 (d,  $J = 1.3$  Hz, 3H,  $\text{C}_{12/13}\text{H}_3$ ), 1.70 (d,  $J = 1.3$  Hz, 3H,  $\text{C}_{12/13}\text{H}_3$ ), 1.55 (ddd,  $J = 14.5, 10.5, 4.3$  Hz, 1H,  $\text{C}_3\text{H}_b$ ), 1.12 (s, 9H,  $\text{NH}(\text{S}(\text{O})\text{C}(\text{CH}_3)_3)$ ).

$^{13}\text{C}$  NMR (125.8 MHz,  $\text{CD}_3\text{CN}$ , 60 °C):  $\delta$  177.9 ( $\text{C}_{8a}$ ), 146.2 ( $\text{C}_4$ ), 145.5 ( $\text{C}_{7a}$ ), 135.2 ( $\text{C}_{11}$ ), 131.0 ( $\text{C}_6$ ), 128.9 ( $\text{C}_{4a}$ ), 127.1 ( $\text{C}_{10}$ ), 121.5 ( $\text{C}_5$ ), 108.5 ( $\text{C}_7$ ), 65.6 ( $\text{C}_{3a}$ ), 59.3 ( $\text{C}_9$ ), 57.5 ( $\text{S}(\text{O})\text{C}(\text{CH}_3)_3$ ), 46.3 ( $\text{C}_2$ ), 36.1 ( $\text{C}_3$ ), 27.4 ( $\text{N}_8\text{CH}_3$ ), 26.4 ( $\text{C}_{12/13}$ ), 23.5 ( $\text{S}(\text{O})\text{C}(\text{CH}_3)_3$ ), 19.5 ( $\text{C}_{12/13}$ ).

FTIR (thin film)  $\text{cm}^{-1}$ : 3300 (br-m), 2928 (m), 1717 (s), 1601 (m), 1467 (m).

HRMS (ESI) ( $m/z$ ): calc'd for  $\text{C}_{20}\text{H}_{30}\text{N}_3\text{O}_2\text{S} [\text{M}+\text{H}]^+$ : 376.2053, found: 376.2033.

$[\alpha]_D^{24}$ : +41 ( $c = 1.3$ ,  $\text{CH}_2\text{Cl}_2$ ).

TLC (9% methanol, 1% ammonium hydroxide in chloroform),  $R_f$ : 0.26 (UV, CAM).

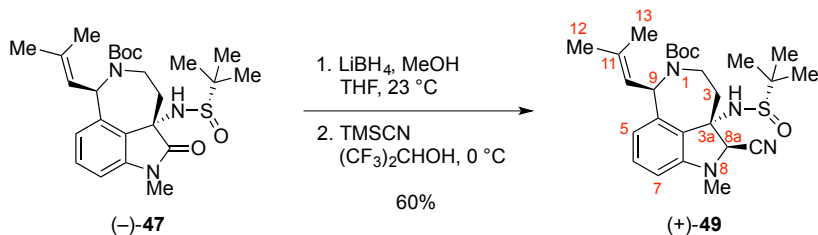

### **Aminonitrile (+)-49:**

A solution of lithium borohydride (2.0 M in tetrahydrofuran, 7.2 mL, 14 mmol, 2.0 equiv) was added dropwise via syringe over 5 min to a solution of tricyclic oxindole (-)-47 (3.43 g, 7.21 mmol, 1 equiv) and methanol (2.30 mL, 57.7 mmol, 8.00 equiv) in tetrahydrofuran (72 mL) at 0 °C. After 10 min, the mixture was allowed to warm to 23 °C. After 15 h, the reaction mixture was cooled to 0 °C and a saturated aqueous ammonium chloride solution (70 mL) was added. The resulting mixture was allowed to stir vigorously while warming to room temperature. The mixture was then diluted with deionized water (50 mL) and extracted with ethyl acetate (3 × 100 mL). The combined organic extracts were washed with a saturated aqueous sodium chloride solution (100 mL), were dried over anhydrous sodium sulfate, were filtered, and were concentrated under reduced pressure providing the crude hemiaminal (3.70 g, 2:1 dr).

**CAUTION!** Trimethylsilyl cyanide is very toxic and should only be used with great caution.<sup>11</sup> The crude hemiaminal was dissolved in hexafluoroisopropanol (72 mL) and cooled to 0 °C in an ice bath. Trimethylsilyl cyanide (1.44 mL, 10.8 mmol, 1.50 equiv) was then added via syringe. After 2 h, an aqueous sodium hydroxide solution (1 N, 125 mL) was added followed by deionized water (100 mL) and dichloromethane (175 mL). After warming to 23 °C, the layers were separated and the aqueous layer was extracted with dichloromethane (2 × 100 mL). The combined organic extracts were washed with a saturated aqueous sodium chloride solution (50 mL), were dried over anhydrous sodium sulfate, were filtered, and were concentrated under reduced pressure providing the crude aminonitrile as a mixture of diastereomers (2:1 dr). The diastereomeric mixture could be easily separated by flash column chromatography on silica gel (eluent: 25%→50% ethyl acetate in hexanes) to afford the major diastereomer of aminonitrile (+)-49 (2.11 g, 60.1%, more polar) as an off-white foam and the minor, less polar diastereomer (1.04 g, 29.6%) as a light yellow foam.

As a result of the slow conformational equilibration at ambient temperature, NMR spectra were collected at elevated temperature. Structural assignments were made using additional information from gCOSY, HSQC, and HMBC experiments also collected at elevated temperature.

<sup>1</sup>H NMR (500 MHz, CD<sub>3</sub>CN, 70 °C):

δ 7.22 (app-t, *J* = 7.8 Hz, 1H, C<sub>6</sub>H), 6.75 (d, *J* = 7.7 Hz, 1H, C<sub>5</sub>H), 6.60 (d, *J* = 7.9 Hz, 1H, C<sub>7</sub>H), 5.77 (br-s, 1H, C<sub>10</sub>H), 5.59 (d, *J* = 7.0 Hz, 1H, C<sub>9</sub>H), 4.79 (s, 1H, C<sub>8a</sub>H), 4.06 (s, 1H, NH(S(O)C(CH<sub>3</sub>)<sub>3</sub>), 3.79–3.71 (m, 2H, C<sub>2</sub>H<sub>a</sub>, C<sub>2</sub>H<sub>b</sub>), 2.89 (s, 3H, N<sub>8</sub>CH<sub>3</sub>), 2.56 (m, 1H, C<sub>3</sub>H<sub>a</sub>), 2.48 (app-dt, *J* = 14.7, 4.0 Hz, 1H, C<sub>3</sub>H<sub>a</sub>), 1.84 (s, 3H, C<sub>12/13</sub>H<sub>3</sub>), 1.68 (s, 3H, C<sub>12/13</sub>H<sub>3</sub>), 1.35 (s, 9H, N<sub>1</sub>CO<sub>2</sub>C(CH<sub>3</sub>)<sub>3</sub>), 1.17 (s, 9H, NH(S(O)C(CH<sub>3</sub>)<sub>3</sub>).

|                                                                  |                                                                                                                                                                                                                                                                                                                                                                                                                                                                                                                                                                                                                                                                                                                                               |
|------------------------------------------------------------------|-----------------------------------------------------------------------------------------------------------------------------------------------------------------------------------------------------------------------------------------------------------------------------------------------------------------------------------------------------------------------------------------------------------------------------------------------------------------------------------------------------------------------------------------------------------------------------------------------------------------------------------------------------------------------------------------------------------------------------------------------|
| $^{13}\text{C}$ NMR (125.8 MHz, $\text{CD}_3\text{CN}$ , 70 °C): | $\delta$ 156.8 ( $\text{N}_1\text{CO}_2\text{C}(\text{CH}_3)_3$ ), 153.2 ( $\text{C}_{7a}$ ), 143.6 ( $\text{C}_4$ ), 137.4 ( $\text{C}_{11}$ ), 131.9 ( $\text{C}_6$ ), 128.5 ( $\text{C}_{4a}$ ), 124.3 ( $\text{C}_{10}$ ), 120.1 ( $\text{C}_5$ ), 117.7 (CN), 109.4 ( $\text{C}_7$ ), 81.5 ( $\text{N}_1\text{CO}_2\text{C}(\text{CH}_3)_3$ ), 70.3 ( $\text{C}_{8a}$ ), 69.7 ( $\text{C}_{3a}$ ), 60.3 ( $\text{C}_9$ ), 57.8 ( $\text{S}(\text{O})\text{C}(\text{CH}_3)_3$ ), 46.4 ( $\text{C}_2$ ), 35.0 ( $\text{C}_3$ ), 34.4 ( $\text{N}_8\text{CH}_3$ ), 29.5 ( $\text{N}_1\text{CO}_2\text{C}(\text{CH}_3)_3$ ), 26.5 ( $\text{C}_{12/13}$ ), 23.8 ( $\text{S}(\text{O})\text{C}(\text{CH}_3)_3$ ), 19.4 ( $\text{C}_{12/13}$ ). |
| FTIR (thin film) $\text{cm}^{-1}$ :                              | 3293 (br-w), 2973 (m), 1690 (s), 1592 (m), 1456 (m).                                                                                                                                                                                                                                                                                                                                                                                                                                                                                                                                                                                                                                                                                          |
| HRMS (ESI) ( $m/z$ ):                                            | calc'd for $\text{C}_{26}\text{H}_{39}\text{N}_4\text{O}_3\text{S}$ [ $\text{M}+\text{H}$ ] $^+$ : 487.2737,<br>found: 487.2734.                                                                                                                                                                                                                                                                                                                                                                                                                                                                                                                                                                                                              |
| $[\alpha]_{\text{D}}^{24}$ :                                     | +43 ( $c = 1.2$ , $\text{CH}_2\text{Cl}_2$ ).                                                                                                                                                                                                                                                                                                                                                                                                                                                                                                                                                                                                                                                                                                 |
| TLC (50% ethyl acetate in hexanes), $R_f$ :                      | 0.24 (UV, CAM).                                                                                                                                                                                                                                                                                                                                                                                                                                                                                                                                                                                                                                                                                                                               |

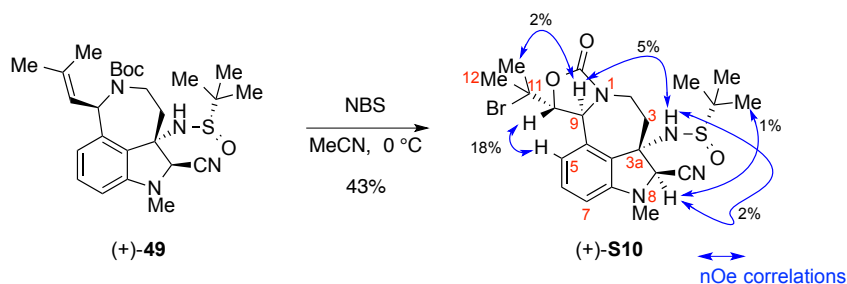

### Oxazolidinone (+)-S10:

A solution of *N*-bromosuccinimide (22.0 mg, 123  $\mu\text{mol}$ , 1.20 equiv) in acetonitrile (500  $\mu\text{L}$ ) was added via syringe to a solution of aminonitrile (+)-**49** (50.0 mg, 103  $\mu\text{mol}$ , 1 equiv) in acetonitrile (1.50 mL) at 0 °C in an ice bath. After 45 min, a saturated aqueous sodium thiosulfate solution (5 mL) was added and the mixture was extracted with dichloromethane (2  $\times$  25 mL). The combined organic extracts were washed with a saturated aqueous sodium chloride solution (5 mL), were dried over anhydrous sodium sulfate, were filtered, and were concentrated under reduced pressure. The resulting residue was purified by flash column chromatography on silica gel (eluent: 15%  $\rightarrow$  40% acetone in hexanes) to afford oxazolidinone (+)-**S10** (22.4 mg, 42.7%) as a white foam. Structural assignments were made using additional information from nOe, gCOSY, HSQC, and HMBC experiments.

$^1\text{H}$  NMR (500 MHz,  $\text{C}_6\text{D}_6$ , 20 °C):  $\delta$  6.96 (app-t,  $J = 7.9$  Hz, 1H,  $\text{C}_6\text{H}$ ), 6.53 (d,  $J = 8.1$  Hz, 1H,  $\text{C}_5\text{H}$ ), 6.20 (d,  $J = 8.0$  Hz, 1H,  $\text{C}_7\text{H}$ ), 5.14 (d,  $J = 3.4$  Hz, 1H,  $\text{C}_9\text{H}$ ), 4.93 (s, 1H,  $\text{C}_{8a}\text{H}$ ), 4.60 (d,  $J = 3.3$  Hz, 1H,  $\text{C}_{10}\text{H}$ ), 4.20 (app-dt,  $J = 14.2, 3.6$  Hz, 1H,  $\text{C}_2\text{H}_a$ ), 3.54 (s, 1H,  $\text{NH}(\text{S}(\text{O})\text{C}(\text{CH}_3)_3)$ ), 3.47 (ddd,  $J = 14.0, 12.2, 1.7$  Hz, 1H,  $\text{C}_2\text{H}_b$ ), 2.64–2.57 (m, 1H,  $\text{C}_3\text{H}_a$ ), 2.40 (s, 3H,  $\text{N}_8\text{CH}_3$ ), 2.38–2.33 (m, 1H,  $\text{C}_3\text{H}_b$ ), 1.57 (s, 3H,  $\text{C}_{12}\text{H}_3$ ), 1.50 (s, 3H,  $\text{C}_{12}\text{H}_3$ ), 0.79 (s, 9H,  $\text{NH}(\text{S}(\text{O})\text{C}(\text{CH}_3)_3)$ ).

$^{13}\text{C}$  NMR (125.8 MHz,  $\text{C}_6\text{D}_6$ , 20 °C):  $\delta$  156.6 ( $\text{CO}_2$ ), 152.3 ( $\text{C}_{7a}$ ), 138.7 ( $\text{C}_4$ ), 131.8 ( $\text{C}_6$ ), 128.5 ( $\text{C}_{4a}$ ), 116.1 ( $\text{C}_5$ ), 115.7 (CN), 109.5 ( $\text{C}_7$ ), 81.1 ( $\text{C}_{10}$ ), 68.9 ( $\text{C}_{3a}$ ), 67.6 ( $\text{C}_{8a}$ ), 66.8 ( $\text{C}_{11}$ ), 61.3 ( $\text{C}_9$ ), 56.5 ( $\text{S}(\text{O})\text{C}(\text{CH}_3)_3$ ), 41.3 ( $\text{C}_2$ ), 34.4 ( $\text{C}_3$ ), 32.9 ( $\text{N}_8\text{CH}_3$ ), 30.3 ( $\text{C}_{12}$ ), 28.5 ( $\text{C}_{12}$ ), 22.7 ( $\text{S}(\text{O})\text{C}(\text{CH}_3)_3$ ).

FTIR (thin film)  $\text{cm}^{-1}$ : 3244 (br-w), 2962 (m), 1750 (s), 1592 (m), 1451(m).

HRMS (ESI) ( $m/z$ ): calc'd for  $\text{C}_{22}\text{H}_{30}\text{BrN}_4\text{O}_3\text{S} [\text{M}+\text{H}]^+$ : 509.1217, found: 509.1228.

$[\alpha]_{\text{D}}^{24}$ : +34 ( $c = 0.79$ ,  $\text{CH}_2\text{Cl}_2$ ).

TLC (33% acetone in hexanes),  $R_f$ : 0.18 (UV, CAM).

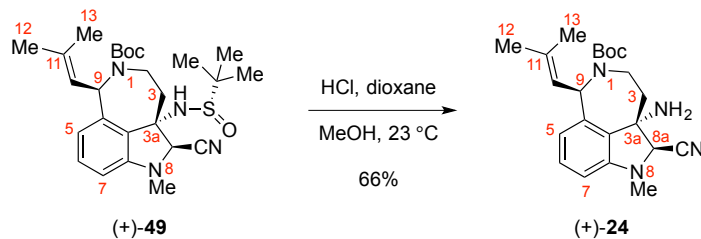

### **Tricyclic amine (+)-24:**

A solution of hydrochloric acid in 1,4-dioxane (4.0 M, 2.20 mL, 8.80 mmol, 2.00 equiv) was added via syringe to a solution of aminonitrile (+)-**49** (2.11 g, 4.34 mmol, 1 equiv) in methanol (87 mL) at 23 °C. After 7 h, an aqueous sodium hydroxide solution (0.5 N, 90 mL) was added and the mixture was extracted with dichloromethane (3 × 300 mL). The combined organic extracts were washed with a saturated aqueous sodium chloride solution (110 mL), were dried over anhydrous sodium sulfate, were filtered, and were concentrated under reduced pressure. The resulting residue was purified by flash column chromatography on silica gel (eluent: 10%→20% acetone in hexanes) to afford tricyclic amine (+)-**24** (1.09 g, 65.7%) as a white foam. The NMR spectra of the desired tricyclic amine (+)-**24** matched the data described for this compound prepared from the alternative route (page S37).

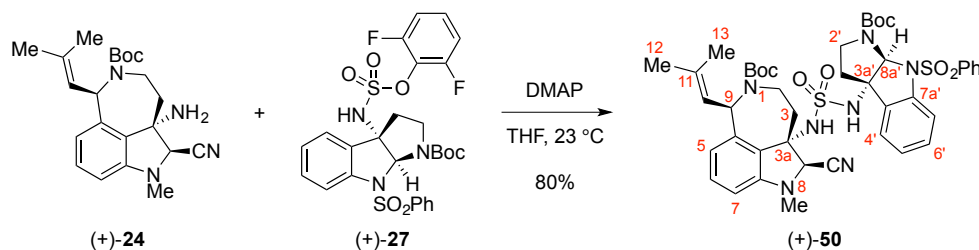

### Sulfamide (+)-50:

A sample of 4-(dimethylamino)pyridine (518 mg, 4.24 mmol, 2.50 equiv) was added to a solution of tricyclic amine (+)-**24** (662 mg, 1.70 mmol, 1 equiv) and sulfamate ester (+)-**27** (1.21 g, 1.98 mmol, 1.17 equiv) in tetrahydrofuran (8.5 mL) at 23 °C. After 20 h, deionized water (50 mL) was added and the mixture was extracted with dichloromethane (3 × 50 mL). The combined organic extracts were washed with a saturated aqueous sodium chloride solution (35 mL), were dried over anhydrous sodium sulfate, were filtered, and were concentrated under reduced pressure. The resulting residue was purified by flash column chromatography on silica gel (eluent: 20%→30% ethyl acetate in hexanes) to afford sulfamide (+)-**50** (1.17 g, 80.0%) as an off-white foam.<sup>15</sup>

As a result of the slow conformational equilibration at ambient temperature, NMR spectra were collected at elevated temperature. Structural assignments were made using additional information from gCOSY, HSQC, and HMBC experiments also collected at elevated temperature.

<sup>1</sup>H NMR (500 MHz, C<sub>6</sub>D<sub>6</sub>, 70 °C):

δ 8.06 (br-s, 2H, N<sub>8</sub>SO<sub>2</sub>Ph-*o*-H), 7.66 (d, *J* = 8.1 Hz, 1H, C<sub>7</sub>H), 7.31 (s, 1H, C<sub>4</sub>H), 7.04–6.82 (m, 6H, N<sub>8</sub>SO<sub>2</sub>Ph-*p*-H, N<sub>8</sub>SO<sub>2</sub>Ph-*m*-H, C<sub>6</sub>H, C<sub>6</sub>'H, C<sub>8a</sub>H), 6.85 (t, *J* = 7.5 Hz, 1H, C<sub>5</sub>'H), 6.48 (d, *J* = 6.5 Hz, 1H, C<sub>5</sub>H), 6.13 (d, *J* = 7.8 Hz, 1H, C<sub>7</sub>H), 6.03 (br-s, 1H, C<sub>9</sub>H), 5.28 (s, 1H, C<sub>8a</sub>H), 5.10 (d, *J* = 6.3 Hz, 1H, C<sub>10</sub>H), 4.48–4.38 (m, 1H, C<sub>2</sub>H<sub>a</sub>), 4.17 (s, 1H, SO<sub>2</sub>NH), 3.92 (br-s, 1H, C<sub>2</sub>H<sub>a</sub>), 3.12 (dd, *J* = 14.6, 8.0 Hz, 1H, C<sub>2</sub>H<sub>b</sub>), 3.02 (br-s, 1H, C<sub>3</sub>H<sub>a</sub>), 2.74 (br-s, 1H, C<sub>3</sub>H<sub>a</sub>), 2.66–2.50 (m, 2H, C<sub>2</sub>H<sub>b</sub>, C<sub>3</sub>H<sub>b</sub>), 2.44 (s, 3H, N<sub>8</sub>CH<sub>3</sub>), 1.98 (br-s, 1H, C<sub>3</sub>H<sub>b</sub>), 1.54 (s, 12H, NCO<sub>2</sub>C(CH<sub>3</sub>)<sub>3</sub>, C<sub>12/13</sub>H<sub>3</sub>), 1.42 (s, 3H, C<sub>12/13</sub>H<sub>3</sub>), 1.32 (s, 9H, NCO<sub>2</sub>C(CH<sub>3</sub>)<sub>3</sub>).

<sup>13</sup>C NMR (100 MHz, C<sub>6</sub>D<sub>6</sub>, 70 °C):

δ 156.7 (2C, NCO<sub>2</sub>C(CH<sub>3</sub>)<sub>3</sub>, NCO<sub>2</sub>C(CH<sub>3</sub>)<sub>3</sub>), 154.2 (C<sub>7a</sub>'), 152.2 (C<sub>7a</sub>), 143.6 (C<sub>4</sub>), 143.3 (N<sub>8</sub>SO<sub>2</sub>Ph-*ipso*-C), 139.1 (C<sub>11</sub>), 133.0 (C<sub>6</sub>), 132.3 (C<sub>4a</sub>'), 131.6 (N<sub>8</sub>SO<sub>2</sub>Ph-*p*-C), 130.8 (C<sub>6</sub>'), 129.3 (N<sub>8</sub>SO<sub>2</sub>Ph-*m*-C), 128.2 (N<sub>8</sub>SO<sub>2</sub>Ph-*o*-C), 127.7 (C<sub>4a</sub>), 125.3 (C<sub>4</sub>'), 124.8 (C<sub>5</sub>'), 123.0 (C<sub>10</sub>), 119.6 (C<sub>5</sub>), 116.8 (C<sub>7</sub>'), 115.8 (CN), 108.4 (C<sub>7</sub>'), 84.3 (C<sub>8a</sub>'), 81.2 (NCO<sub>2</sub>C(CH<sub>3</sub>)<sub>3</sub>), 81.1 (NCO<sub>2</sub>C(CH<sub>3</sub>)<sub>3</sub>), 73.5

<sup>15</sup> To remove residual ethyl acetate, the sample was dried under high vacuum for 5 days at 50 °C.

(C<sub>3a'/3a</sub>), 67.7 (C<sub>3a'/3a</sub>), 66.8 (C<sub>8a</sub>), 57.6 (C<sub>9</sub>), 45.5 (C<sub>2'</sub>), 39.0 (C<sub>2</sub>), 38.0 (C<sub>3'</sub>), 33.2 (N<sub>8</sub>CH<sub>3</sub>), 32.7 (C<sub>3</sub>), 28.9 (2C, NCO<sub>2</sub>C(CH<sub>3</sub>)<sub>3</sub>, NCO<sub>2</sub>C(CH<sub>3</sub>)<sub>3</sub>), 25.5 (C<sub>12/13</sub>), 18.4 (C<sub>12/13</sub>).

FTIR (thin film) cm<sup>-1</sup>: 3220 (br-w), 2976 (m), 1701 (s), 1663 (s), 1448 (w).

HRMS (ESI) (*m/z*): calc'd for C<sub>43</sub>H<sub>53</sub>N<sub>7</sub>NaO<sub>8</sub>S<sub>2</sub> [M+Na]<sup>+</sup>: 882.3289, found: 882.3285.

[α]<sub>D</sub><sup>24</sup>: +84 (*c* = 0.77 CH<sub>2</sub>Cl<sub>2</sub>).

TLC (33% ethyl acetate in hexanes), *R<sub>f</sub>*: 0.25 (UV, CAM).

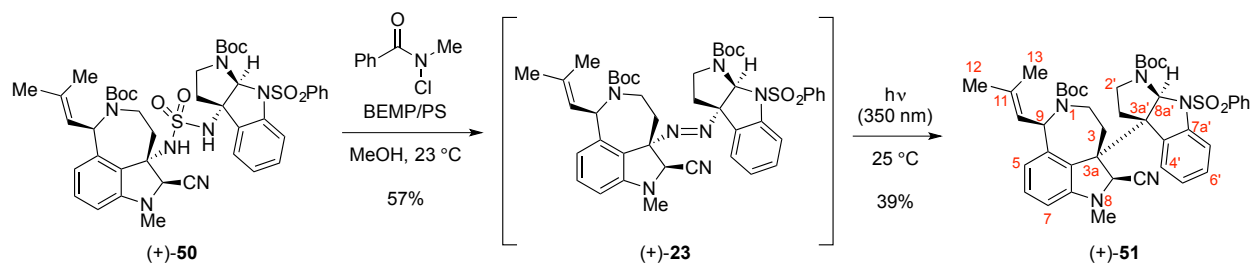

### Heterodimer (+)-51:

To a solution of sulfamide (+)-**50** (300 mg, 349  $\mu\text{mol}$ , 1 equiv) in methanol (34.9 mL) in the dark was added *N*-chloro-*N*-methylbenzamide<sup>16</sup> (**S11**, 355 mg, 2.09 mmol, 6.00 equiv) followed immediately by resin-bound BEMP (1.90 g,  $\sim$ 2.2 mmol/g on 200-400 mesh polystyrene resin, 4.19 mmol, 12.0 equiv) in a single portion. After 18 min, the suspension was filtered through a pad of Celite, and the filter cake was washed sequentially with dichloromethane (60 mL) and ethyl acetate (60 mL). The light yellow filtrate was concentrated under reduced pressure and the resulting residue was purified by flash column chromatography on silica gel in low light (eluent: 15% $\rightarrow$ 20% ethyl acetate in hexanes) to afford unsymmetrical diazene (+)-**23** (157 mg, 56.6%) as a light yellow oil, which slowly solidified under reduced pressure.<sup>17</sup> Unsymmetrical diazene (+)-**23** was used directly in the next step without further purification.

A solution of unsymmetrical diazene (+)-**23** (155 mg, 195  $\mu\text{mol}$ , 1 equiv) in dichloromethane (15 mL) was concentrated under reduced pressure in a 200 mL round bottom flask to provide a thin film of diazene (+)-**23** coating the flask. The flask was evacuated and backfilled with argon (three cycles) and was then irradiated in a Rayonet photoreactor equipped with 16 radially distributed ( $r = 12.7$  cm) 25 W lamps ( $\lambda = 350$  nm) at 25  $^\circ\text{C}$ . After irradiating for 3 h, the lamps were shut off and the resulting residue was purified by flash column chromatography on silica gel (eluent: 20% ethyl acetate in hexanes) to afford an inseparable mixture ( $\sim$ 1:1) of heterodimer (+)-**51** and cyclotryptamine **28** according to <sup>1</sup>H-NMR analysis (91.4 mg, 38.7% corrected yield of **51**) as an off-white foam. This mixture was used directly in the next step without further purification.

As a result of the slow conformational equilibration at ambient temperature, NMR spectra were collected at elevated temperature. Structural assignments were made using additional information from gCOSY, HSQC, and HMBC experiments also collected at elevated temperature. Note that NMR analysis was performed on an analytically pure sample of (+)-**51** obtained via flash chromatography (eluent: 33 $\rightarrow$ 50% *tert*-butyl methyl ether in hexanes).

<sup>16</sup> The reagent was prepared using a procedure adapted from Hiegel, G. A.; Hogenauer, T. J.; Lewis, J. C. *Synth. Commun.* **2005**, 35, 2099. A sample of **S11** was prepared as follows: trichloroisocyanuric acid (860 mg, 3.70 mmol, 0.370 equiv) was added to a solution of *N*-methylbenzamide (1.35 g, 10.0 mmol, 1 equiv) in methanol (20 mL) at 23  $^\circ\text{C}$ . After 4.5 h, Celite (3 g) was added and the suspension was concentrated. The Celite-adsorbed crude mixture was purified via flash column chromatography on silica gel (eluent: 10% ethyl acetate in hexanes, *R*<sub>f</sub>: 0.27) to yield *N*-chloro-*N*-methylbenzamide **S11** (1.48 g, 87.1%) as a colourless oil. Structural assignments were made using additional information from gCOSY and HSQC experiments. <sup>1</sup>H NMR (600 MHz, CDCl<sub>3</sub>, 25 $^\circ\text{C}$ ):  $\delta$  7.55–7.50 (m, 2H, Ph-*o*-H), 7.47–7.42 (m, 1H, Ph-*p*-H), 7.42–7.36 (m, 2H, Ph-*m*-H), 3.41 (s, 3H, NCH<sub>3</sub>). <sup>13</sup>C NMR (150 MHz, CDCl<sub>3</sub>, 25 $^\circ\text{C}$ ):  $\delta$  171.9 (NCO), 133.6 (Ph-*ipso*-C), 131.2 (Ph-*p*-C), 128.5 (Ph-*m*-C), 128.1 (Ph-*o*-C), 43.1 (NCH<sub>3</sub>). HRMS (DART) (*m/z*): calc'd for C<sub>8</sub>H<sub>9</sub>ClNO [M+H]<sup>+</sup>: 170.0367, found: 170.0366.

<sup>17</sup> As a result of the sensitivity of this intermediate, its slow conformational equilibrium at ambient temperature, and its instability at elevated temperatures, we were unable to structurally assign the NMR data for this compound. The measured HRMS was consistent with the desired product; HRMS (ESI) (*m/z*): calc'd for C<sub>43</sub>H<sub>51</sub>N<sub>7</sub>NaO<sub>6</sub>S [M+Na]<sup>+</sup>: 816.3514, found: 816.3526.



$^1\text{H}$  NMR (500 MHz,  $\text{CD}_3\text{CN}$ , 70 °C):  $\delta$  7.90 (d,  $J = 7.1$  Hz, 2H,  $\text{N}_8\text{SO}_2\text{Ph-}o\text{-H}$ ), 7.60 (app-t,  $J = 7.4$  Hz, 1H,  $\text{N}_8\text{SO}_2\text{Ph-}p\text{-H}$ ), 7.51 (app-t,  $J = 7.9$  Hz, 2H,  $\text{N}_8\text{SO}_2\text{Ph-}m\text{-H}$ ), 7.48 (d,  $J = 7.8$  Hz, 1H,  $\text{C}_4\text{H}$ ), 7.34–7.29 (m, 2H,  $\text{C}_6\text{H}$ ,  $\text{C}_6\text{H}$ ), 7.23 (d,  $J = 8.0$  Hz, 1H,  $\text{C}_7\text{H}$ ), 7.17 (app-td,  $J = 7.6, 1.1$  Hz, 1H,  $\text{C}_5\text{H}$ ), 6.70 (d,  $J = 7.9$  Hz, 2H,  $\text{C}_5\text{H}$ ,  $\text{C}_7\text{H}$ ), 6.01 (d,  $J = 9.4$  Hz, 1H,  $\text{C}_9\text{H}$ ), 5.98 (s, 1H,  $\text{C}_{8a}\text{H}$ ), 5.27 (d,  $J = 9.4$  Hz, 1H,  $\text{C}_{10}\text{H}$ ), 3.93 (app-dt,  $J = 14.1, 2.8$  Hz, 1H,  $\text{C}_2\text{H}_a$ ), 3.88 (s, 1H,  $\text{C}_{8a}\text{H}$ ), 3.71 (dd,  $J = 11.4, 7.2$  Hz, 1H,  $\text{C}_2\text{H}_a$ ), 3.26–3.20 (m, 1H,  $\text{C}_2\text{H}_b$ ), 3.08 (ddd,  $J = 15.8, 12.5, 3.5$  Hz, 1H,  $\text{C}_3\text{H}_a$ ), 2.78 (s, 3H,  $\text{N}_8\text{CH}_3$ ), 2.34 (app-td,  $J = 11.9, 4.3$  Hz, 1H,  $\text{C}_2\text{H}_b$ ), 2.21 (dd,  $J = 11.8, 4.3$  Hz, 1H,  $\text{C}_3\text{H}_a$ ), 2.17 (app-dt,  $J = 15.2, 2.3$  Hz, 1H,  $\text{C}_3\text{H}_b$ ), 1.97–1.91 (m, 1H,  $\text{C}_3\text{H}_b$ ), 1.90 (d,  $J = 1.2$  Hz, 3H,  $\text{C}_{12/13}\text{H}_3$ ), 1.81 (d,  $J = 1.3$  Hz, 3H,  $\text{C}_{12/13}\text{H}_3$ ), 1.52 (s, 9H,  $\text{NCO}_2\text{C}(\text{CH}_3)_3$ ), 1.21 (s, 9H,  $\text{NCO}_2\text{C}(\text{CH}_3)_3$ ).

$^{13}\text{C}$  NMR (125.8 MHz,  $\text{CD}_3\text{CN}$ , 70 °C):  $\delta$  155.6 ( $\text{N}_1\text{CO}_2\text{C}(\text{CH}_3)_3$ ), 154.5 ( $\text{N}_1\text{CO}_2\text{C}(\text{CH}_3)_3$ ), 153.7 ( $\text{C}_{7a}$ ), 144.3 ( $\text{C}_{7a}$ ), 143.7 ( $\text{N}_8\text{SO}_2\text{Ph-}ipso\text{-C}$ ), 140.9 ( $\text{C}_4$ ), 134.9 ( $\text{C}_{11}$ ), 134.2 ( $\text{N}_8\text{SO}_2\text{Ph-}p\text{-C}$ ), 132.6 ( $\text{C}_{4a}$ ), 131.3 ( $\text{C}_{4a}$ ), 130.9 (2C,  $\text{C}_6$ ,  $\text{C}_6$ ), 130.6 ( $\text{N}_8\text{SO}_2\text{Ph-}m\text{-C}$ ), 127.4 ( $\text{N}_8\text{SO}_2\text{Ph-}o\text{-C}$ ), 126.1 ( $\text{C}_4$ ), 125.7 ( $\text{C}_{10}$ ), 125.5 ( $\text{C}_5$ ), 122.2 ( $\text{C}_5$ ), 118.1 (CN), 115.5 ( $\text{C}_7$ ), 109.4 ( $\text{C}_7$ ), 82.7 ( $\text{C}_{8a}$ ), 81.4 (2C,  $\text{NCO}_2\text{C}(\text{CH}_3)_3$ ), 71.3 ( $\text{C}_{8a}$ ), 59.3 ( $\text{C}_9$ ), 58.6 (2C,  $\text{C}_{3a}$ ,  $\text{C}_{3a}$ ), 45.5 ( $\text{C}_2$ ), 42.9 ( $\text{C}_2$ ), 37.3 ( $\text{C}_3$ ), 35.1 ( $\text{C}_3$ ), 34.5 ( $\text{N}_8\text{CH}_3$ ), 29.2 ( $\text{NCO}_2\text{C}(\text{CH}_3)_3$ ), 28.6 ( $\text{NCO}_2\text{C}(\text{CH}_3)_3$ ), 26.0 ( $\text{C}_{12/13}$ ), 19.3 ( $\text{C}_{12/13}$ ).

FTIR (thin film)  $\text{cm}^{-1}$ : 2976 (m), 1698 (s), 1583 (w), 1477 (m), 1391 (s).

HRMS (ESI) ( $m/z$ ): calc'd for  $\text{C}_{43}\text{H}_{51}\text{N}_5\text{NaO}_6\text{S}$  [ $\text{M}+\text{Na}$ ] $^+$ : 788.3452, found: 788.3459.

$[\alpha]_D^{24}$ : +141 ( $c = 1.04$   $\text{CH}_2\text{Cl}_2$ ).

TLC (50% *tert*-butyl methyl ether in hexanes),  $R_f$ : 0.4 (UV, CAM).

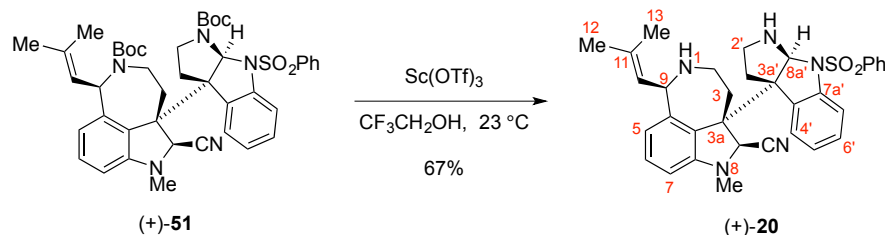

### Heterodimeric diamine (+)-20:

A sample of scandium(III) trifluoromethanesulfonate (223 mg, 452  $\mu\text{mol}$ , 6.00 equiv) was added to an inseparable mixture of heterodimer (+)-51 (57.8 mg, 75.4  $\mu\text{mol}$ , 1 equiv) and cyclotryptamine **28** (31.2 mg, 77.8  $\mu\text{mol}$ , 1.03 equiv) dissolved in 2,2,2-trifluoroethanol (7.50 mL) at 23  $^\circ\text{C}$ . After 25 min, a saturated aqueous sodium bicarbonate solution (15 mL) was added and the mixture was extracted with dichloromethane (3  $\times$  15 mL). The combined organic extracts were washed with a saturated aqueous sodium chloride solution (15 mL), were dried over anhydrous sodium sulfate, were filtered, and were concentrated under reduced pressure. The resulting residue was purified by flash column chromatography on silica gel (eluent: 33% acetone, 1% methanol in dichloromethane) to afford heterodimeric diamine (+)-20 (28.4 mg, 66.6%) as a light tan foam. Structural assignments were made using additional information from gCOSY, HSQC, and HMBC experiments.

$^1\text{H}$  NMR (500 MHz,  $\text{CD}_3\text{CN}$ , 20  $^\circ\text{C}$ ):  $\delta$  8.15 (dd,  $J = 8.5, 1.3$  Hz, 2H,  $\text{N}_8\text{SO}_2\text{Ph-}o\text{-H}$ ), 7.63 (app-t,  $J = 7.4$  Hz, 1H,  $\text{N}_8\text{SO}_2\text{Ph-}p\text{-H}$ ), 7.54 (app-t,  $J = 7.7$  Hz, 2H,  $\text{N}_8\text{SO}_2\text{Ph-}m\text{-H}$ ), 7.25 (app-t,  $J = 7.8$  Hz, 1H,  $\text{C}_6\text{H}$ ), 7.23–7.19 (m, 1H,  $\text{C}_6\text{H}$ ), 7.16 (d,  $J = 7.6$  Hz, 1H,  $\text{C}_4'\text{H}$ ), 7.13 (d,  $J = 8.0$  Hz, 1H,  $\text{C}_7'\text{H}$ ), 6.96 (app-td,  $J = 7.5, 1.1$  Hz, 1H,  $\text{C}_5'\text{H}$ ), 6.76 (d,  $J = 7.8$  Hz, 1H,  $\text{C}_5\text{H}$ ), 6.62 (d,  $J = 7.8$  Hz, 1H,  $\text{C}_7\text{H}$ ), 5.77 (s, 1H,  $\text{C}_{8a}'\text{H}$ ), 5.40 (d,  $J = 8.3$  Hz, 1H,  $\text{C}_{10}\text{H}$ ), 4.77 (d,  $J = 7.5$  Hz, 1H,  $\text{C}_9\text{H}$ ), 4.20 (s, 1H,  $\text{C}_{8a}\text{H}$ ), 2.83 (dd,  $J = 10.7, 6.7$  Hz, 1H,  $\text{C}_2'\text{H}_a$ ), 2.79 (s, 3H,  $\text{N}_8\text{CH}_3$ ), 2.78–2.71 (m, 2H  $\text{C}_2\text{H}_a, \text{C}_2\text{H}_b$ ), 2.45 (app-td,  $J = 11.6, 6.8$  Hz, 1H,  $\text{C}_3'\text{H}_a$ ), 2.28 (dd,  $J = 11.3, 3.7$  Hz, 1H,  $\text{C}_3'\text{H}_b$ ), 2.12 (m, 2H,  $\text{C}_2\text{H}_b, \text{C}_3\text{H}_a$ ), 1.89 (dd,  $J = 15.2, 5.2$  Hz, 1H,  $\text{C}_3\text{H}_b$ ), 1.81 (d,  $J = 1.2$  Hz, 3H,  $\text{C}_{12/13}\text{H}_3$ ), 1.53 (s, 1H,  $\text{C}_{12/13}\text{H}_3$ ).

$^{13}\text{C}$  NMR (125.8 MHz,  $\text{CD}_3\text{CN}$ , 20  $^\circ\text{C}$ ):  $\delta$  153.1 ( $\text{C}_{7a}$ ), 143.8 ( $\text{C}_{7a}'$ ), 141.5 ( $\text{N}_8\text{SO}_2\text{Ph-}ipso\text{-C}$ ), 139.5 ( $\text{C}_4$ ), 135.8 ( $\text{C}_{11}$ ), 134.6 ( $\text{N}_8\text{SO}_2\text{Ph-}p\text{-C}$ ), 133.1 ( $\text{C}_{4a}'$ ), 131.6 ( $\text{C}_6$ ), 130.6 ( $\text{C}_6'$ ), 130.5 ( $\text{N}_8\text{SO}_2\text{Ph-}m\text{-C}$ ), 129.0 ( $\text{N}_8\text{SO}_2\text{Ph-}o\text{-C}$ ), 128.7 ( $\text{C}_{4a}$ ), 127.9 ( $\text{C}_4'$ ), 125.8 ( $\text{C}_{10}$ ), 124.4 ( $\text{C}_5'$ ), 118.5 ( $\text{C}_5$ ), 117.7 (CN), 113.6 ( $\text{C}_7'$ ), 108.7 ( $\text{C}_7$ ), 86.1 ( $\text{C}_{8a}'$ ), 68.5 ( $\text{C}_{8a}$ ), 66.4 ( $\text{C}_{3a}'$ ), 58.3 ( $\text{C}_{3a}$ ), 54.2 ( $\text{C}_9$ ), 46.4 ( $\text{C}_2$ ), 43.8 ( $\text{C}_2$ ), 38.9 ( $\text{C}_3$ ), 34.5 ( $\text{C}_3$ ), 33.5 ( $\text{N}_8\text{CH}_3$ ), 26.4 ( $\text{C}_{12/13}$ ), 19.4 ( $\text{C}_{12/13}$ ).

FTIR (thin film)  $\text{cm}^{-1}$ : 3358 (br-w), 2936 (m), 1587 (m), 1476 (s), 1352 (s).

HRMS (ESI) ( $m/z$ ): calc'd for  $\text{C}_{33}\text{H}_{36}\text{N}_5\text{O}_2\text{S}$   $[\text{M}+\text{H}]^+$ : 566.2584,  
found: 566.2607.

$[\alpha]_{\text{D}}^{24}$ : +235 ( $c = 0.44$   $\text{CH}_2\text{Cl}_2$ ).

TLC (9% methanol, 1% ammonium hydroxide in chloroform),  $R_f$ : 0.37 (UV, CAM).

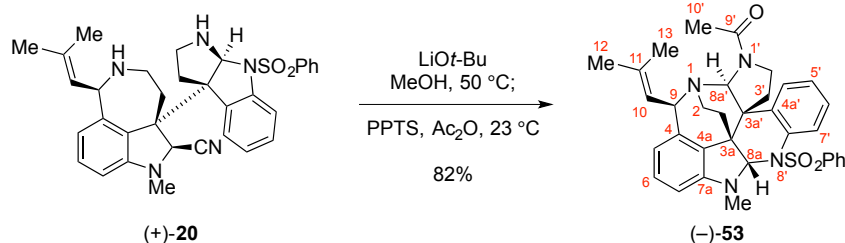

### *N*8'-Benzenesulfonyl Communesin F (-)-**53**:

A solution of lithium *tert*-butoxide (0.100 M in MeOH, 1.13 mL, 113  $\mu$ mol, 10.0 equiv) was added to a solution of heterodimer (+)-**20** (6.30 mg, 11.1  $\mu$ mol, 1 equiv) in methanol (1.13 mL). The vessel was sealed then immersed in a preheated 50  $^{\circ}$ C oil bath and was allowed to stir under a static atmosphere of argon. After 4 h, the reaction mixture was cooled to 23  $^{\circ}$ C, after which pyridinium *p*-toluenesulfonate (22.4 mg, 89.1  $\mu$ mol, 8.00 equiv) and acetic anhydride (9.5  $\mu$ L, 100  $\mu$ mol, 9.00 equiv) were added sequentially. After 24 min, a saturated aqueous sodium bicarbonate solution (3 mL) was added and the resulting heterogeneous mixture was diluted with deionized water (5 mL) then extracted with dichloromethane ( $3 \times 10$  mL). The combined organic extracts were washed with a saturated aqueous sodium chloride solution (10 mL), were dried over anhydrous sodium sulfate, were filtered, and were concentrated under reduced pressure. The residue was purified via flash column chromatography (eluent: 25%  $\rightarrow$  30% acetone in hexanes) to afford *N*8'-benzenesulfonyl communesin F (-)-**53** (5.3 mg, 82%) as a white solid. Structural assignments were made using additional information from gCOSY, HSQC, and HMBC experiments.

$^1$ H NMR (500 MHz, CD<sub>3</sub>CN, 20  $^{\circ}$ C, 2.7:1 mixture of atropisomers, \*denotes minor atropisomer):

$\delta$  8.00 (d,  $J = 7.3$  Hz, 2H, SO<sub>2</sub>Ph-*o*-H), 7.71–7.64 (m, 2H, N<sub>8'</sub> SO<sub>2</sub>Ph-*p*-H, C<sub>7</sub>H), 7.61 (app-t,  $J = 7.6$  Hz, 2H, SO<sub>2</sub>Ph-*m*-H), 7.25 (app-t,  $J = 7.8$  Hz, 1H, C<sub>6</sub>H), 7.10 (app-t,  $J = 7.0$  Hz, 1H, C<sub>5</sub>H), 6.90 (d,  $J = 7.7$  Hz, 1H, C<sub>4</sub>H), 6.77 (app-td,  $J = 7.7, 0.7$  Hz, 1H, C<sub>6</sub>H), 6.72 (d,  $J = 7.8$  Hz, 1H, C<sub>4</sub>H\*), 6.06 (d,  $J = 9.6$  Hz, 1H, C<sub>5</sub>H\*), 6.04 (d,  $J = 7.8$  Hz, 1H, C<sub>5</sub>H), 5.82 (d,  $J = 7.7$  Hz, 1H, C<sub>7</sub>H), 5.79 (s, 1H, C<sub>8a</sub>H), 5.77 (s, 1H, C<sub>8a</sub>H\*), 5.25 (s, 1H, C<sub>8a</sub>H\*), 5.20 (d,  $J = 9.1$  Hz, 1H, C<sub>10</sub>H), 5.13–5.09 (m, 3H, C<sub>9</sub>H, C<sub>8a</sub>H, C<sub>10</sub>H\*), 3.62–3.56 (m, 1H, C<sub>2</sub>H<sub>a</sub>), 3.27 (dd,  $J = 15.5, 9.8$  Hz, 1H, C<sub>2</sub>H<sub>a</sub>), 3.23–3.18 (m, 1H, C<sub>2</sub>H<sub>a</sub>\*), 3.09–2.99 (m, 1H, C<sub>2</sub>H<sub>b</sub>), 2.93–2.86 (m, 1H, C<sub>2</sub>H<sub>b</sub>\*), 2.68 (ddd,  $J = 19.0, 12.4, 6.7$  Hz, 1H, C<sub>2</sub>H<sub>b</sub>), 2.57–2.49 (m, 4H, N<sub>8</sub>CH<sub>3</sub>, C<sub>3</sub>H<sub>a</sub>), 2.36 (app-dt,  $J = 17.7, 8.9$  Hz, 1H, C<sub>3</sub>H<sub>a</sub>), 2.26 (s, 3H, C<sub>10</sub>H<sub>3</sub>), 2.20–2.11 (m, 1H, C<sub>3</sub>H<sub>b</sub>), 1.97 (s, 3H, C<sub>10</sub>H<sub>3</sub>\*), 1.82 (s, 3H, C<sub>12/13</sub>H<sub>3</sub>), 1.76 (s, 3H, C<sub>12/13</sub>H<sub>3</sub>\*), 1.73 (s, 3H, C<sub>12/13</sub>H<sub>3</sub>\*), 1.26 (ddd,  $J = 25.4, 13.4, 7.4$  Hz, 1H, C<sub>3</sub>H<sub>b</sub>).

$^{13}\text{C}$  NMR (125.8 MHz,  $\text{CD}_3\text{CN}$ , 20 °C, 2.7:1 mixture of atropisomers, \*denotes minor atropisomer):  $\delta$  171.84 ( $\text{C}_9'$ ), 171.15 ( $\text{C}_9^*$ ), 150.60 ( $\text{C}_{7a}$ ), 143.71 ( $\text{C}_4^*$ ), 142.85 ( $\text{C}_4$ ), 142.25 ( $\text{N}_8\text{SO}_2\text{Ph-}ipso\text{-C}^*$ ), 142.17 ( $\text{N}_8\text{SO}_2\text{Ph-}ipso\text{-C}$ ), 141.07 ( $\text{C}_{4a}'^*$ ), 140.81 ( $\text{C}_{4a}'$ ), 138.77 ( $\text{C}_{11}^*$ ), 137.35 ( $\text{C}_{11}$ ), 137.27 ( $\text{C}_{7a}'$ ), 134.97 ( $\text{N}_8\text{SO}_2\text{Ph-}p\text{-C}$ ), 134.91 ( $\text{N}_8\text{SO}_2\text{Ph-}p\text{-C}^*$ ), 131.98 ( $\text{C}_{4a}^*$ ), 131.69 ( $\text{C}_{4a}$ ), 130.94 ( $\text{N}_8\text{SO}_2\text{Ph-}m\text{-C}^*$ ), 130.92 ( $\text{N}_8\text{SO}_2\text{Ph-}m\text{-C}$ ), 130.02 ( $\text{C}_6^*$ ), 130.00 ( $\text{C}_6$ ), 128.77 ( $\text{N}_8\text{SO}_2\text{Ph-}o\text{-C}^*$ ), 128.73 (2C,  $\text{N}_8\text{SO}_2\text{Ph-}o\text{-C}$ ,  $\text{C}_6'$ ), 127.94 ( $\text{C}_5^*$ ), 127.77 ( $\text{C}_5'$ ), 127.06 ( $\text{C}_7'$ ), 125.89 ( $\text{C}_{10}^*$ ), 125.69 ( $\text{C}_{10}$ ), 125.38 ( $\text{C}_4'$ ), 125.28 ( $\text{C}_4'^*$ ), 116.61 ( $\text{C}_5$ ), 116.51 ( $\text{C}_5^*$ ), 102.39 ( $\text{C}_7^*$ ), 102.32 ( $\text{C}_7$ ), 86.30 ( $\text{C}_{8a}^*$ ), 86.22 ( $\text{C}_{8a}$ ), 80.69 ( $\text{C}_{8a}'$ ), 79.59 ( $\text{C}_{8a}'^*$ ), 65.63 ( $\text{C}_9^*$ ), 65.33 ( $\text{C}_9$ ), 55.18 ( $\text{C}_{3a}$ ), 55.09 ( $\text{C}_{3a}^*$ ), 53.57 ( $\text{C}_{3a}'$ ), 51.44 ( $\text{C}_{3a}'^*$ ), 46.55 ( $\text{C}_2^*$ ), 45.00 ( $\text{C}_2$ ), 38.96 ( $\text{C}_3^*$ ), 38.60 ( $\text{C}_3$ ), 37.45 ( $\text{C}_2^*$ ), 37.24 ( $\text{C}_2$ ), 33.76 ( $\text{C}_3'^*$ ), 32.15 ( $\text{C}_3'$ ), 30.78 ( $\text{N}_8\text{CH}_3^*$ ), 30.74 ( $\text{N}_8\text{CH}_3$ ), 26.32 ( $\text{C}_{12/13}$ ), 26.09 ( $\text{C}_{12/13}^*$ ), 23.43 ( $\text{C}_{10}'^*$ ), 23.26 ( $\text{C}_{10}'$ ), 18.97 ( $\text{C}_{12/13}$ ), 18.93 ( $\text{C}_{12/13}^*$ ).

FTIR (thin film)  $\text{cm}^{-1}$ : 2927 (m), 1653 (s), 1600 (m), 1486 (m), 1448 (w).

HRMS (ESI) ( $m/z$ ): calc'd for  $\text{C}_{34}\text{H}_{37}\text{N}_4\text{O}_3\text{S}$  [ $\text{M}+\text{H}$ ] $^+$ : 581.2581, found: 581.2573.

$[\alpha]_D^{24}$ : -190 ( $c = 0.21$   $\text{CH}_2\text{Cl}_2$ ).

TLC (50% acetone in hexanes),  $R_f$ : 0.37 (UV, CAM).

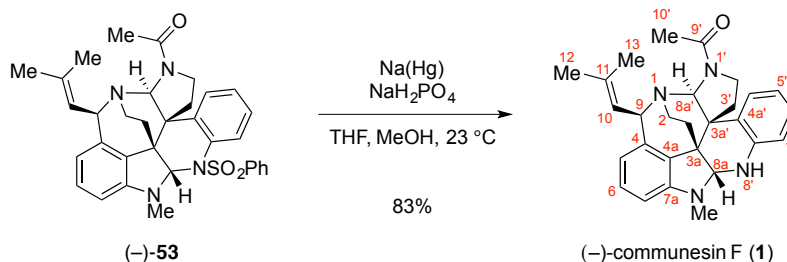

**(-)-Communesin F (1):**

A sample of sodium amalgam<sup>18</sup> (5%-Na, 160 mg, 348  $\mu\text{mol}$ , 20.0 equiv) was added to a suspension of sodium phosphate monobasic monohydrate (52.6 mg, 383  $\mu\text{mol}$ , 22.0 equiv) and *N*8'-benzenesulfonyl communesin F (-)-**53** (10.1 mg, 17.4  $\mu\text{mol}$ , 1 equiv) in tetrahydrofuran (250  $\mu\text{L}$ ) and methanol (750  $\mu\text{L}$ ) at 23  $^\circ\text{C}$ . After 20 min, another portion of sodium phosphate monobasic monohydrate (52.6 mg, 383  $\mu\text{mol}$ , 22.0 equiv) and sodium amalgam (5%-Na, 160 mg, 348  $\mu\text{mol}$ , 20.0 equiv) were added sequentially. After an additional 20 min, another portion of sodium phosphate monobasic monohydrate (52.6 mg, 383  $\mu\text{mol}$ , 22.0 equiv) and sodium amalgam (5%-Na, 160 mg, 348  $\mu\text{mol}$ , 20.0 equiv) were added sequentially. After an additional 20 min, a final portion of sodium phosphate monobasic monohydrate (52.6 mg, 383  $\mu\text{mol}$ , 22.0 equiv) and sodium amalgam (5%-Na, 160 mg, 348  $\mu\text{mol}$ , 20.0 equiv) were added sequentially. After 30 min, an aqueous solution of 5% sodium bicarbonate (5 mL) was added and the resulting mixture was extracted with dichloromethane (3  $\times$  10 mL). The combined organic extracts were washed with a saturated aqueous sodium chloride solution (5 mL), were dried over anhydrous sodium sulfate, were filtered, and were concentrated under reduced pressure. The resulting residue was purified by flash column chromatography on silica gel (eluent: 25%  $\rightarrow$  33% acetone in hexanes) to afford (-)-communesin F (**1**) (6.40 mg, 83.1%) as a white solid. Structural assignments were made using additional information from gCOSY, HSQC, and HMBC experiments.

<sup>1</sup>H NMR (500 MHz, CDCl<sub>3</sub>, 20  $^\circ\text{C}$ , 3.1:1 mixture of atropisomers, \*denotes minor atropisomer):

$\delta$  7.00 (td,  $J = 7.5, 1.5$  Hz, 1H, C<sub>6</sub>H), 6.82 (app-t,  $J = 7.7$  Hz, 1H, C<sub>6</sub>H), 6.74–6.66 (m, 3H, C<sub>4</sub>H, C<sub>5</sub>H, C<sub>7</sub>H), 6.14 (d,  $J = 7.8$  Hz, 1H, C<sub>5</sub>H\*), 6.08 (d,  $J = 7.8$  Hz, 1H, C<sub>5</sub>H), 5.86 (d,  $J = 7.4$  Hz, 1H, C<sub>7</sub>H), 5.85 (d,  $J = 6.7$  Hz, 1H, C<sub>7</sub>H\*), 5.48 (s, 1H, C<sub>8a</sub>H\*), 5.36 (d,  $J = 8.6$  Hz, 1H, C<sub>9</sub>H\*), 5.23 (br-d,  $J = 8.8$  Hz, 1H, C<sub>10</sub>H), 5.11 (s, 1H, C<sub>8a</sub>H), 5.05 (d,  $J = 8.9$  Hz, 1H, C<sub>9</sub>H), 4.67 (s, 1H, C<sub>8a</sub>H), 4.63 (s, 1H, C<sub>8a</sub>H\*), 4.57 (br-s, 1H, N<sub>8</sub>H), 3.85 (dd,  $J = 11.8, 8.8$  Hz, 1H, C<sub>2</sub>H), 3.68 (app-t,  $J = 9.1$  Hz, 1H, C<sub>2</sub>H\*), 3.42 (dd,  $J = 15.3, 9.2$  Hz, 1H, C<sub>2</sub>H\*), 3.34 (dd,  $J = 15.4, 9.4$  Hz, 1H, C<sub>2</sub>H), 3.22–3.10 (m, 3H, C<sub>2</sub>H, C<sub>2</sub>H\*, C<sub>2</sub>H\*), 3.03 (td,  $J = 11.4, 7.5$  Hz, 1H, C<sub>2</sub>H), 2.95–2.87 (m, 1H, C<sub>3</sub>H\*), 2.82 (s, 3H, N<sub>8</sub>-CH<sub>3</sub>), 2.80 (s, 3H, N<sub>8</sub>-CH<sub>3</sub>\*), 2.78–2.71 (m, 1H,

<sup>18</sup> The reagent was prepared according to McDonald, R. N.; Reineke, C. E. *Org. Synth.* **1970**, *50*, 50.

$C_3H$ ), 2.40 (s, 3H,  $C_{10}H_3$ ), 2.33–2.19 (m, 4H,  $C_3H_2$ ,  $C_3H_2$ ,  $C_3H_2^*$ ), 2.11 (s, 3H,  $C_{10}H_3^*$ ), 2.04–2.00 (m, 1H,  $C_3H^*$ ), 1.99–1.95 (m, 4H,  $C_{12/13}H_3$ ,  $C_3H$ ), 1.85 (d,  $J = 1.1$  Hz, 3H,  $C_{12/13}H_3$ ), 1.79 (d,  $J = 0.9$  Hz, 3H,  $C_{12/13}H_3$ ), 1.75 (s, 1H,  $C_{12/13}H_3^*$ ).

$^{13}C$  NMR (125.8 MHz,  $CDCl_3$ , 20 °C, 3:1:1 mixture of atropisomers, \*denotes minor atropisomer):  $\delta$  171.6 ( $C_9$ ), 170.7 ( $C_9^*$ ), 150.1 ( $C_{7a}$ ), 150.0 ( $C_{7a}^*$ ) 142.9 ( $C_{7a}^*$ ), 142.7 ( $C_{7a}$ ), 141.6 ( $C_4^*$ ), 140.6 ( $C_4$ ), 137.9 ( $C_{11}^*$ ), 136.1 ( $C_{11}$ ), 132.9 ( $C_{4a}^*$ ), 132.7 ( $C_{4a}$ ), 131.5 ( $C_{4a}^*$ ), 131.3 ( $C_{4a}$ ), 128.3 ( $C_6$ ), 128.1 ( $C_6^*$ ), 127.3 ( $C_6'$ ), 127.1 ( $C_{4^*/5^*/7^*$ ), 124.6 ( $C_{10}$ ), 124.5 ( $C_{10}^*$ ), 123.5 ( $C_{4^*/5^*/7^*$ ), 123.2 ( $C_{4^*/5^*/7^*$ ), 120.7 ( $C_{4^*/5^*/7^*$ ), 120.6 ( $C_{4^*/5^*/7^*$ ), 116.99 ( $C_6^*$ ), 116.97 ( $C_{4^*/5^*/7^*$ ), 115.4 ( $C_5^*$ ), 114.7 ( $C_5$ ), 100.7 ( $C_7$ ), 100.6 ( $C_7^*$ ), 83.0 ( $C_{8a}^*$ ), 82.6 ( $C_{8a}$ ), 79.5 ( $C_{8a}'$ ), 78.1 ( $C_{8a}^*$ ), 64.5 ( $C_9^*$ ), 64.4 ( $C_9$ ), 51.8 ( $C_{3a}$ ), 51.2 ( $C_{3a}'$ ), 51.1 ( $C_{3a^*/3a^*$ ), 49.9 ( $C_{3a^*/3a^*$ ), 46.0 ( $C_2^*$ ), 44.2 ( $C_2'$ ), 38.1 ( $C_3^*$ ), 37.8 ( $C_3$ ), 36.7 ( $C_2^*$ ), 36.3 ( $C_2$ ), 32.4 ( $C_3^*$ ), 30.8 ( $C_3'$ ), 29.9 ( $N_8-CH_3^*$ ), 29.7 ( $N_8-CH_3$ ), 26.0 ( $C_{12/13}$ ), 25.9 ( $C_{12^*/13^*$ ), 23.1 ( $C_{10}^*$ ), 22.7 ( $C_{10}$ ), 18.5 ( $C_{12/13}$ ), 18.4 ( $C_{12^*/13^*$ ).

FTIR (thin film)  $cm^{-1}$ : 3315 (br-m), 2927 (m), 1636 (s), 1597 (s), 1492 (m).

HRMS (ESI) ( $m/z$ ): calc'd for  $C_{28}H_{33}N_4O$   $[M+H]^+$ : 441.2649, found: 441.2633.

$[\alpha]_D^{24}$ : -249 ( $c = 0.13$   $CHCl_3$ ).

TLC (50% acetone in hexanes),  $R_f$ : 0.37 (UV, CAM).

**Table S1. Comparison of our <sup>1</sup>H NMR data for (-)-communesin F (1) with literature data (CDCl<sub>3</sub>, major atropisomer):**

| Assignment | Hayashi's Isolation Report <sup>19</sup> ,<br>(-)-1<br><sup>1</sup> H NMR<br>500 MHz, CDCl <sub>3</sub> | Qin's Report <sup>20</sup><br>(±)-1<br><sup>1</sup> H NMR<br>500 MHz, CDCl <sub>3</sub> | Weinreb's Report <sup>21</sup><br>(±)-1<br><sup>1</sup> H NMR<br>300 MHz, CDCl <sub>3</sub> | Ma's Report <sup>22</sup><br>(-)-1<br><sup>1</sup> H NMR<br>400 MHz, CDCl <sub>3</sub>  | Funk's Report <sup>23</sup><br>(±)-1<br><sup>1</sup> H NMR<br>400 MHz, CDCl <sub>3</sub> | This Work<br>(-)-1<br><sup>1</sup> H NMR, 500 MHz,<br>CDCl <sub>3</sub>          |
|------------|---------------------------------------------------------------------------------------------------------|-----------------------------------------------------------------------------------------|---------------------------------------------------------------------------------------------|-----------------------------------------------------------------------------------------|------------------------------------------------------------------------------------------|----------------------------------------------------------------------------------|
| C2         | 3.14 (ddd, <i>J</i> = 15.5, 12.2, 8.5 Hz, 1H)<br>3.34 (dd, <i>J</i> = 15.5, 9.1 Hz, 1H)                 | 3.14 (ddd, <i>J</i> = 15.6, 12.2, 8.8 Hz, 1H)<br>3.34 (dd, <i>J</i> = 15.4, 9.2 Hz, 1H) | 3.25–3.17 (m, 1H)<br>3.34–3.27 (m, 1H)                                                      | 3.14 (ddd, <i>J</i> = 15.6, 12.2, 8.8 Hz, 1H)<br>3.33 (dd, <i>J</i> = 15.4, 9.2 Hz, 1H) | 3.15 (m, 1H)<br>3.34 (dd, <i>J</i> = 15.7, 9.4 Hz, 1H)                                   | 3.17–3.10 (m, 1H)<br>3.34 (dd, <i>J</i> = 15.4, 9.4 Hz, 1H)                      |
| C2'        | 3.03 (app-td, <i>J</i> = 11.6, 7.6 Hz, 1H)<br>3.85 (dd, <i>J</i> = 11.6, 8.8 Hz, 1H)                    | 3.03 (app-td, <i>J</i> = 11.6, 7.6 Hz, 1H)<br>3.85 (dd, <i>J</i> = 11.6, 9.2 Hz, 1H)    | 3.04–2.96 (m, 1H)<br>3.83 (dd, <i>J</i> = 11.4, 8.8 Hz, 1H)                                 | 3.03 (app-td, <i>J</i> = 11.6, 7.6 Hz, 1H)<br>3.84 (dd, <i>J</i> = 12.0, 8.8 Hz, 1H)    | 3.03 (app-td, <i>J</i> = 11.5, 7.5 Hz, 1H)<br>3.85 (dd, <i>J</i> = 11.5, 9.1 Hz, 1H)     | 3.03 (td, <i>J</i> = 11.4, 7.5 Hz, 1H)<br>3.85 (dd, <i>J</i> = 11.8, 8.8 Hz, 1H) |
| C3         | 2.22 (app-dt, <i>J</i> = 12.2, 9.1 Hz, 1H)<br>2.29 (dd, <i>J</i> = 12.2, 8.5 Hz, 1H)                    | 2.22 (m, 1H)<br>2.29 (m, 1H)                                                            | 2.30–2.18 (m, 2H)                                                                           | 2.29–2.16 (m, 2H)                                                                       | 2.32–2.19 (m, 2H)                                                                        | 2.33–2.19 (m, 2H)                                                                |
| C3'        | 1.96 (dd, <i>J</i> = 12.8, 7.6 Hz, 1H)<br>2.74 (ddd, <i>J</i> = 12.8, 11.6, 8.8 Hz, 1H)                 | 1.96 (dd, <i>J</i> = 13.2, 7.6 Hz, 1H)<br>2.74 (ddd, <i>J</i> = 13.2, 11.6, 8.8 Hz, 1H) | 1.97–1.91 (m, 1H)<br>2.75–2.70 (m, 1H)                                                      | 1.96–1.90 (m, 1H)<br>2.76–2.70 (m, 1H)                                                  | 1.99–1.94 (m, 1H)<br>2.78–2.70 (m, 1H)                                                   | 1.99–1.95 (m, 1H)<br>2.78–2.71 (m, 1H)                                           |
| C4'        | 6.68 (dd, <i>J</i> = 7.3, 1.5 Hz, 1H)                                                                   | 6.68 (dd, <i>J</i> = 7.3, 1.5 Hz, 1H)                                                   | 6.72–6.64 (m, 1H)                                                                           | 6.73–6.65 (m, 1H)                                                                       | 6.73–6.65 (m, 1H)                                                                        | 6.74–6.66 (m, 1H)                                                                |
| C5         | 6.08 (d, <i>J</i> = 7.6 Hz)                                                                             | 6.08 (d, <i>J</i> = 7.6 Hz)                                                             | 6.06 (d, <i>J</i> = 7.7 Hz)                                                                 | 6.07 (d, <i>J</i> = 7.6 Hz)                                                             | 6.08 (d, <i>J</i> = 7.7 Hz)                                                              | 6.08 (d, <i>J</i> = 7.8 Hz, 1H)                                                  |
| C5'        | 6.70 (app-td, <i>J</i> = 7.3, 1.5 Hz, 1H)                                                               | 6.70 (app-td, <i>J</i> = 7.3, 1.5 Hz, 1H)                                               | 6.72–6.64 (m, 1H)                                                                           | 6.73–6.65 (m, 1H)                                                                       | 6.73–6.65 (m, 1H)                                                                        | 6.74–6.66 (m, 1H)                                                                |
| C6         | 6.82 (app-t, <i>J</i> = 7.6 Hz, 1H)                                                                     | 6.82 (app-t, <i>J</i> = 7.6 Hz, 1H)                                                     | 6.80 (app-t, <i>J</i> = 7.7 Hz, 1H)                                                         | 6.82 (app-t, <i>J</i> = 7.6 Hz, 1H)                                                     | 6.82 (app-t, <i>J</i> = 7.7 Hz, 1H)                                                      | 6.82 (app-t, <i>J</i> = 7.7 Hz, 1H)                                              |
| C6'        | 7.00 (app-td, <i>J</i> = 7.3, 1.5 Hz, 1H)                                                               | 7.00 (app-td, <i>J</i> = 7.3, 1.5 Hz, 1H)                                               | 6.68 (dd, <i>J</i> = 7.7, 1.7 Hz, 1H)                                                       | 6.98 (app-td, <i>J</i> = 7.6, 1.6 Hz, 1H)                                               | 7.00 (app-t, <i>J</i> = 7.2 Hz, 1H)                                                      | 7.00 (td, <i>J</i> = 7.5, 1.5 Hz, 1H)                                            |
| C7         | 5.86 (d, <i>J</i> = 7.6 Hz, 1H)                                                                         | 5.86 (d, <i>J</i> = 7.6 Hz, 1H)                                                         | 5.84 (d, <i>J</i> = 7.6 Hz, 1H)                                                             | 5.86 (d, <i>J</i> = 7.2 Hz, 1H)                                                         | 5.86 (d, <i>J</i> = 7.4 Hz, 1H)                                                          | 5.86 (d, <i>J</i> = 7.4 Hz, 1H)                                                  |

<sup>19</sup> Hayashi, H.; Matsumoto, H.; Akiyama, K. *Biosci. Biotechnol. Biochem.* **2004**, *68*, 753.

<sup>20</sup> Yang, J.; Wu, H.; Shen, Y.; Qin, Y. *J. Am. Chem. Soc.* **2007**, *129*, 13794.

<sup>21</sup> Liu, P.; Seo, J. H.; Weinreb, S. M. *Angew. Chem. Int. Ed.* **2010**, *49*, 2000.

<sup>22</sup> Zuo, Z.; Xie, W.; Ma, D. *J. Am. Chem. Soc.* **2010**, *132*, 13226.

<sup>23</sup> Belmar, J.; Funk, R. L. *J. Am. Chem. Soc.* **2012**, *134*, 16941.



|                    |                                  |                                  |                            |                            |                            |                            |
|--------------------|----------------------------------|----------------------------------|----------------------------|----------------------------|----------------------------|----------------------------|
| C7'                | 6.68 (dd, $J = 7.3, 1.5$ Hz, 1H) | 6.68 (dd, $J = 7.3, 1.5$ Hz, 1H) | 6.72–6.64 (m, 1H)          | 6.73–6.65 (m, 1H)          | 6.73–6.65 (m, 1H)          | 6.74–6.66 (m, 1H)          |
| N8-CH <sub>3</sub> | 2.82 (s, 3H)                     | 2.82 (s, 3H)                     | 2.80 (s, 3H)               | 2.82 (s, 3H)               | 2.82 (s, 3H)               | 2.82 (s, 3H)               |
| N8'-H              | 4.60 (br-s, 1H)                  | 4.60 (br-s, 1H)                  | 3.76 (br-s, 0.5H)          | 4.57 (br-s, 1H)            | 4.57 (br-s, 1H)            | 4.57 (br s, 1 H)           |
| C8a                | 4.66 (s, 1H)                     | 4.66 (s, 1H)                     | 4.64 (s, 1H)               | 4.67 (s, 1H)               | 4.67 (s, 1H)               | 4.67 (s, 1H)               |
| C8a'               | 5.11 (s, 1H)                     | 5.11 (s, 1H)                     | 5.09 (s, 1H)               | 5.10 (s, 1H)               | 5.11 (s, 1H)               | 5.10 (s, 1H)               |
| C9                 | 5.05 (d, $J = 8.8$ Hz, 1H)       | 5.05 (d, $J = 8.8$ Hz, 1H)       | 5.03 (d, $J = 8.8$ Hz, 1H) | 5.04 (d, $J = 9.2$ Hz, 1H) | 5.05 (d, $J = 8.8$ Hz, 1H) | 5.05 (d, $J = 8.9$ Hz, 1H) |
| C10                | 5.22 (d, $J = 8.8$ Hz, 1H)       | 5.22 (d, $J = 8.8$ Hz, 1H)       | 5.21 (d, $J = 8.9$ Hz, 1H) | 5.22 (d, $J = 8.8$ Hz, 1H) | 5.23 (d, $J = 8.7$ Hz, 1H) | 5.23 (d, $J = 8.8$ Hz, 1H) |
| C10'               | 2.41 (s, 3H)                     | 2.41 (s, 3H)                     | 2.38 (s, 3H)               | 2.40 (s, 3H)               | 2.40 (s, 3H)               | 2.40 (s, 3H)               |
| C12                | 1.79 (d, $J = 0.6$ Hz, 3H)       | 1.79 (d, $J = 0.8$ Hz, 3H)       | 1.76 (d, $J = 1.1$ Hz, 3H) | 1.79 (d, $J = 0.8$ Hz, 3H) | 1.77 (s, 3H)               | 1.79 (d, $J = 0.9, 3H)$    |
| C13                | 1.85 (d, $J = 0.6$ Hz, 3H)       | 1.85 (d, $J = 0.8$ Hz, 3H)       | 1.83 (d, $J = 1.2$ Hz, 3H) | 1.85 (d, $J = 0.8$ Hz, 3H) | 1.85 (s, 3H)               | 1.85 (d, $J = 1.1$ Hz, 3H) |

**Table S2. Comparison of our  $^{13}\text{C}$  NMR data for (-)-communesin F (1) with literature data ( $\text{CDCl}_3$ , major atropisomer):**

| Assignment         | Hayashi's Isolation Report <sup>19</sup><br>(-)-1<br>$^{13}\text{C}$ NMR<br>500 MHz,<br>$\text{CDCl}_3$ | Qin's Report<br>(±)-1 <sup>20</sup><br>$^{13}\text{C}$ NMR<br>500<br>MHz, $\text{CDCl}_3$ | Weinreb's Report<br>(±)-1 <sup>21</sup><br>$^{13}\text{C}$ NMR<br>300<br>MHz, $\text{CDCl}_3$ | Ma's Report<br>(-)-1 <sup>22</sup><br>$^{13}\text{C}$ NMR<br>400 MHz<br>$\text{CDCl}_3$ | Funk's Report<br>(±)-1 <sup>23</sup><br>$^{13}\text{C}$ NMR<br>400 MHz<br>$\text{CDCl}_3$ | This Work<br>(-)-1<br>$^{13}\text{C}$ NMR,<br>500 MHz<br>$\text{CDCl}_3$ | Chemical Shift Difference<br>$\Delta\delta = \delta$ (this work) - $\delta$ (ref 19) |
|--------------------|---------------------------------------------------------------------------------------------------------|-------------------------------------------------------------------------------------------|-----------------------------------------------------------------------------------------------|-----------------------------------------------------------------------------------------|-------------------------------------------------------------------------------------------|--------------------------------------------------------------------------|--------------------------------------------------------------------------------------|
| C2                 | 36.3                                                                                                    | 36.3                                                                                      | 36.2                                                                                          | 36.3                                                                                    | 36.2                                                                                      | 36.3                                                                     | 0.0                                                                                  |
| C2'                | 44.3                                                                                                    | 44.2                                                                                      | 44.2                                                                                          | 44.2                                                                                    | 44.2                                                                                      | 44.2                                                                     | -0.1                                                                                 |
| C3                 | 37.7                                                                                                    | 37.8                                                                                      | 37.8                                                                                          | 37.8                                                                                    | 37.8                                                                                      | 37.8                                                                     | 0.1                                                                                  |
| C3'                | 30.9                                                                                                    | 30.9                                                                                      | 30.8                                                                                          | 30.8                                                                                    | 30.8                                                                                      | 30.8                                                                     | -0.1                                                                                 |
| C3a                | 51.2                                                                                                    | 51.2                                                                                      | 51.2                                                                                          | 51.2                                                                                    | 51.2                                                                                      | 51.8 <sup>24</sup>                                                       | 0.6 <sup>24</sup>                                                                    |
| C3a'               | 51.8                                                                                                    | 51.8                                                                                      | 51.8                                                                                          | 51.8                                                                                    | 51.8                                                                                      | 51.2 <sup>24</sup>                                                       | -0.6 <sup>24</sup>                                                                   |
| C4a                | 131.3                                                                                                   | 131.3                                                                                     | 131.3                                                                                         | 131.3                                                                                   | 131.3                                                                                     | 131.3                                                                    | 0.0                                                                                  |
| C4a'               | 132.7                                                                                                   | 132.7                                                                                     | 132.7                                                                                         | 132.7                                                                                   | 132.7                                                                                     | 132.7                                                                    | 0.0                                                                                  |
| C4                 | 140.6                                                                                                   | 140.6                                                                                     | 140.6                                                                                         | 140.7                                                                                   | 140.6                                                                                     | 140.6                                                                    | 0.0                                                                                  |
| C4'                | 123.2                                                                                                   | 123.2                                                                                     | 123.2                                                                                         | 123.2                                                                                   | 123.2                                                                                     | 123.2                                                                    | 0.0                                                                                  |
| C5                 | 114.7                                                                                                   | 114.7                                                                                     | 114.7                                                                                         | 114.7                                                                                   | 114.7                                                                                     | 114.7                                                                    | 0.0                                                                                  |
| C5'                | 120.6                                                                                                   | 120.6                                                                                     | 120.6                                                                                         | 120.6                                                                                   | 120.6                                                                                     | 120.6                                                                    | 0.0                                                                                  |
| C6                 | 128.4                                                                                                   | 128.4                                                                                     | 128.3                                                                                         | 128.4                                                                                   | 128.4                                                                                     | 128.3                                                                    | -0.1                                                                                 |
| C6'                | 127.3                                                                                                   | 127.3                                                                                     | 127.3                                                                                         | 127.3                                                                                   | 127.3                                                                                     | 127.3                                                                    | 0.0                                                                                  |
| C7                 | 100.8                                                                                                   | 100.8                                                                                     | 100.7                                                                                         | 100.7                                                                                   | 100.7                                                                                     | 100.7                                                                    | -0.1                                                                                 |
| C7'                | 117.0                                                                                                   | 117.0                                                                                     | 117.0                                                                                         | 117.0                                                                                   | 117.0                                                                                     | 117.0                                                                    | 0.0                                                                                  |
| C7a                | 150.1                                                                                                   | 150.1                                                                                     | 150.1                                                                                         | 150.1                                                                                   | 150.1                                                                                     | 150.1                                                                    | 0.0                                                                                  |
| C7a'               | 142.7                                                                                                   | 142.7                                                                                     | 142.7                                                                                         | 142.7                                                                                   | 142.7                                                                                     | 142.7                                                                    | 0.0                                                                                  |
| N8-CH <sub>3</sub> | 29.6                                                                                                    | 29.6                                                                                      | 29.6                                                                                          | 29.7                                                                                    | 29.7                                                                                      | 29.7                                                                     | 0.1                                                                                  |
| C8a                | 82.6                                                                                                    | 82.6                                                                                      | 82.6                                                                                          | 82.7                                                                                    | 82.6                                                                                      | 82.6                                                                     | 0.0                                                                                  |
| C8a'               | 79.6                                                                                                    | 79.6                                                                                      | 79.5                                                                                          | 79.6                                                                                    | 79.6                                                                                      | 79.5                                                                     | -0.1                                                                                 |

<sup>24</sup> Detailed analysis of key gHSQC and gHMBC correlations are most consistent with our revised assignment of C3a and C3a' resonances.

|      |       |       |       |       |       |       |     |
|------|-------|-------|-------|-------|-------|-------|-----|
| C9   | 64.4  | 64.4  | 64.4  | 64.4  | 64.4  | 64.4  | 0.0 |
| C9'  | 171.6 | 171.6 | 171.6 | 171.6 | 171.6 | 171.6 | 0.0 |
| C10  | 124.6 | 124.6 | 124.6 | 124.6 | 124.6 | 124.6 | 0.0 |
| C10' | 22.6  | 22.6  | 22.6  | 22.6  | 22.6  | 22.7  | 0.1 |
| C11  | 136.1 | 136.0 | 136.1 | 136.1 | 136.1 | 136.1 | 0.0 |
| C12  | 26.0  | 26.0  | 26.0  | 26.0  | 26.0  | 26.0  | 0.0 |
| C13  | 18.5  | 18.4  | 18.5  | 18.5  | 18.5  | 18.5  | 0.0 |

### In Situ <sup>1</sup>H NMR Monitoring of the Conversion of Diamine (+)-20 to Heptacycle 52:

Treatment of heterodimer (+)-20 with lithium *tert*-butoxide in methanol provided clean and complete conversion to the desired heptacyclic structure 52 within 1 h at 50° C as observed by in situ <sup>1</sup>H-NMR spectroscopy. Trace1: <sup>1</sup>H NMR (500 MHz) of heterodimer (+)-20 in CD<sub>3</sub>OD with assignments for reference. Trace2–7: <sup>1</sup>H NMR (500 MHz) monitoring of the conversion of heterodimer (+)-20 to communesin core 52. Legend: • = CD<sub>2</sub>HOD, ♦ = HDO, ♣ = CH<sub>2</sub>Cl<sub>2</sub>.

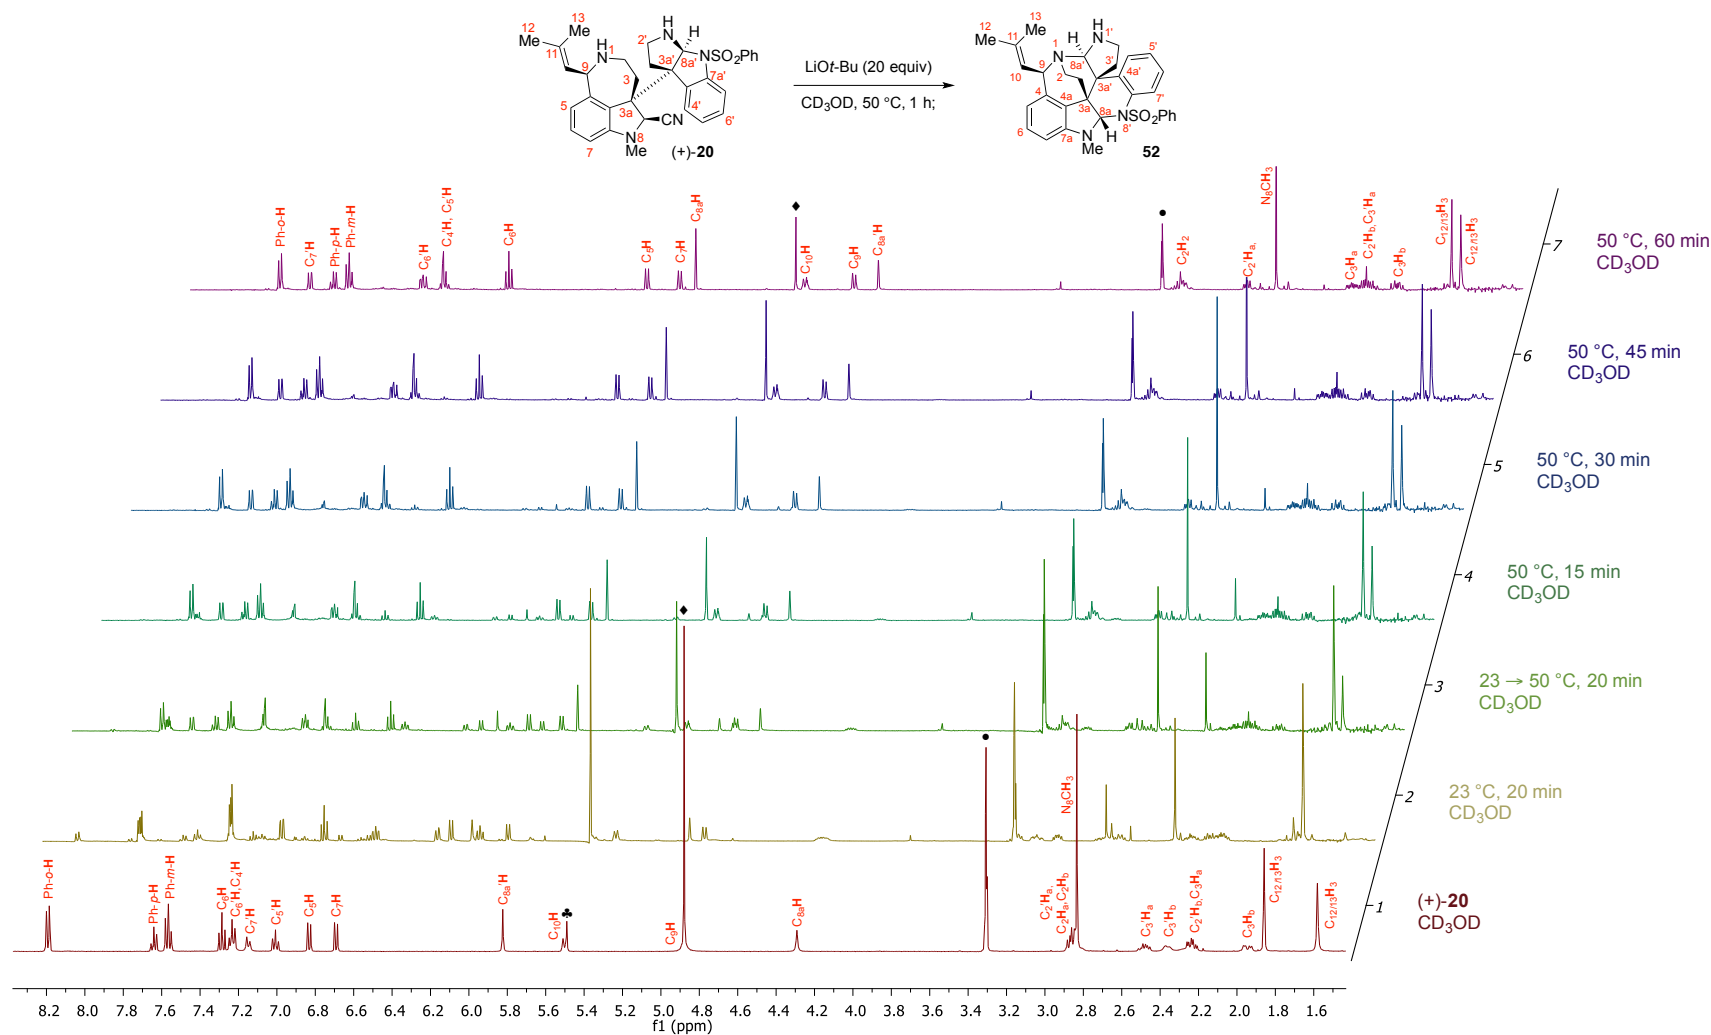

### Calculations Related to Formation of Heterodimer (+)-51:

The conformation distribution and equilibrium geometries (gas phase) in the ground state of heterodimers (+)-51, C3a-*epi*-51 and the corresponding decyano variants C8a-decyano-51 and C3a-*epi*-C8a-decyano-51 were optimized with Merck Molecular Force Field (MMFF)<sup>25</sup> followed by density functional theory at B3LYP level with 6-31G(d) as basis set (Spartan '14, Version 1.1.1, by Wavefunction, Inc.)<sup>26</sup>. The 3D representations of the molecular structures were generated from CYLview.<sup>27</sup>

Photoextrusion of dinitrogen from diazene (+)-23 provided the heterodimer (+)-51 as a single diastereomer. Consistent with this observation, the corresponding undesired diastereomer C3a-*epi*-51 was calculated to be significantly less stable (+8.4 kcal/mol). The contribution of the C8a-nitrile stereochemistry to the energy difference between the two hypothetical C3a epimers, C3a-*epi*-51 and C3a-*epi*-C8a-decyano-51, is noticeable ( $\Delta\Delta E = 3.8$  kcal/mol). Thus, the C8a-stereochemistry of radical 22 reinforces the approach of radical 21 from the opposite face with respect to the C8a-nitrile.

The formation of the C3a-*epi*-heterodimer is intrinsically more difficult as illustrated by radical combination of C8a-decyano-22 and cyclotryptamine 21 to afford C3a-*epi*-C8a-decyano-51 (+4.6 kcal/mol). Our prior studies concerning the radical dimerization of cyclotryptamines indicate that the configuration of C3a' is governed by the C8a'-stereogenic center of the tricyclic system.<sup>28</sup> These confluent factors contribute to the exclusive formation of the desired C3a-C3a' linkage by union of tricyclic radicals 21 and 22.

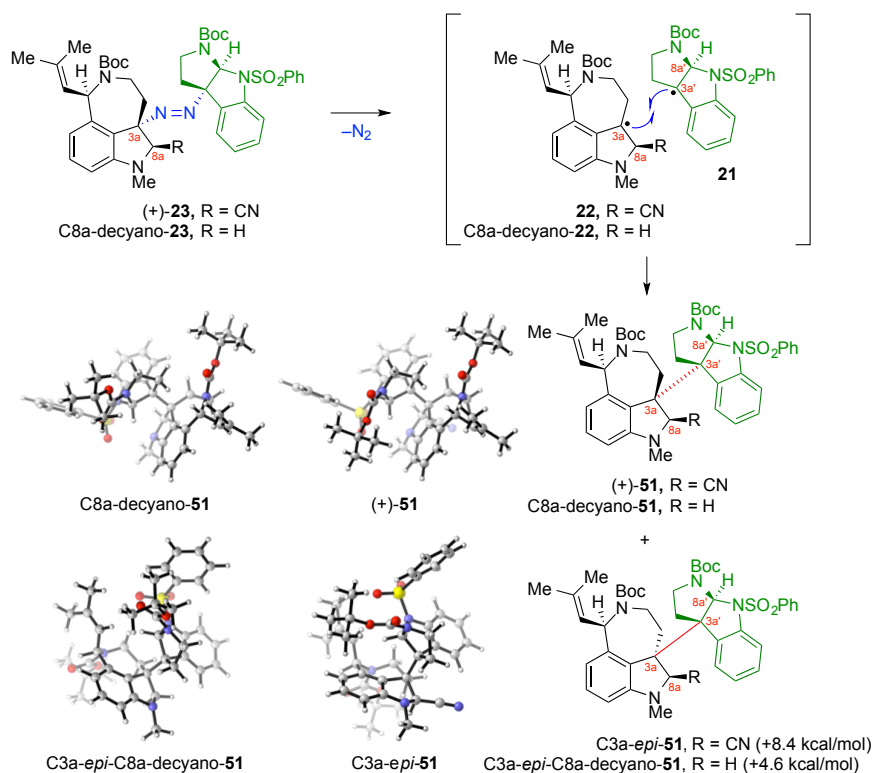

<sup>25</sup> Halgren, T. A. *J. Comput. Chem.* **1996**, *17*, 490.

<sup>26</sup> Spartan'14 Wavefunction, Inc. Irvine, CA. Except for molecular mechanics and semi-empirical models, the calculation methods used in Spartan have been documented in: Shao, Y.; Molnar, L. F.; Jung, Y.; Kussmann, J.; Ochsenfeld, C.; Brown, S. T.; Gilbert, A. T. B.; Slipchenko, L. V.; Levchenko, S. V.; O'Neill, D. P.; DiStasio Jr., R. A.; Lochan, R. C.; Wang, T.; Beran, G. J. O.; Besley, N. A.; Herbert, J. M.; Lin, C. Y.; Van Voorhis, T.; Chien, S. H.; Sodt, A.; Steele, R. P.; Rassolov, V. A.; Maslen, P. E.; Korambath, P. P.; Adamson, R. D.; Austin, B.; Baker, J.; Byrd, E. F. C.; Dachsel, H.; Doerksen, R. J.; Dreuw, A.; Dunietz, B. D.; Dutoi, A. D.; Furlani, T. R.; Gwaltney, S. R.; Heyden, A.; Hirata, S.; Hsu, C.-P.; Kedziora, G.; Khalliulin, R. Z.; Klunzinger, P.; Lee, A. M.; Lee, M. S.; Liang, W. Z.; Lotan, I.; Nair, N.; Peters, B.; Proynov, E. I.; Pieniazek, P. A.; Rhee, Y. M.; Ritchie, J.; Rosta, E.; Sherrill, C. D.; Simmonett, A. C.; Subotnik, J. E.; Woodcock III, H. L.; Zhang, W.; Bell, A. T.; Chakraborty, A. K.; Chipman, D. M.; Keil, F. J.; Warshel, A.; Hehre, W. J.; Schaefer, H. F.; Kong, J.; Krylov, A. I.; Gill, P. M. W.; Head-Gordon, M. *Phys. Chem. Chem. Phys.* **2006**, *8*, 3172.

<sup>27</sup> CYLview, 1.0b; Legault, C. Y., Université de Sherbrooke, 2009 (<http://www.cylview.org>).

<sup>28</sup> (a) Movassaghi, M.; Schmidt, M. A. *Angew. Chem. Int. Ed.* **2007**, *46*, 3725. (b) Movassaghi, M.; Ahmad, O. K.; Lathrop, S. P. *J. Am. Chem. Soc.* **2011**, *133*, 13002. (c) Lathrop, S. P.; Movassaghi, M. *Chem. Sci.* **2014**, *5*, 333.

### Crystal structure of azepane (+)-**48**.<sup>29,30</sup>

Structural parameters for azepane (+)-**48** are freely available from the Cambridge Crystallographic Data Center (CCDC 1471570).

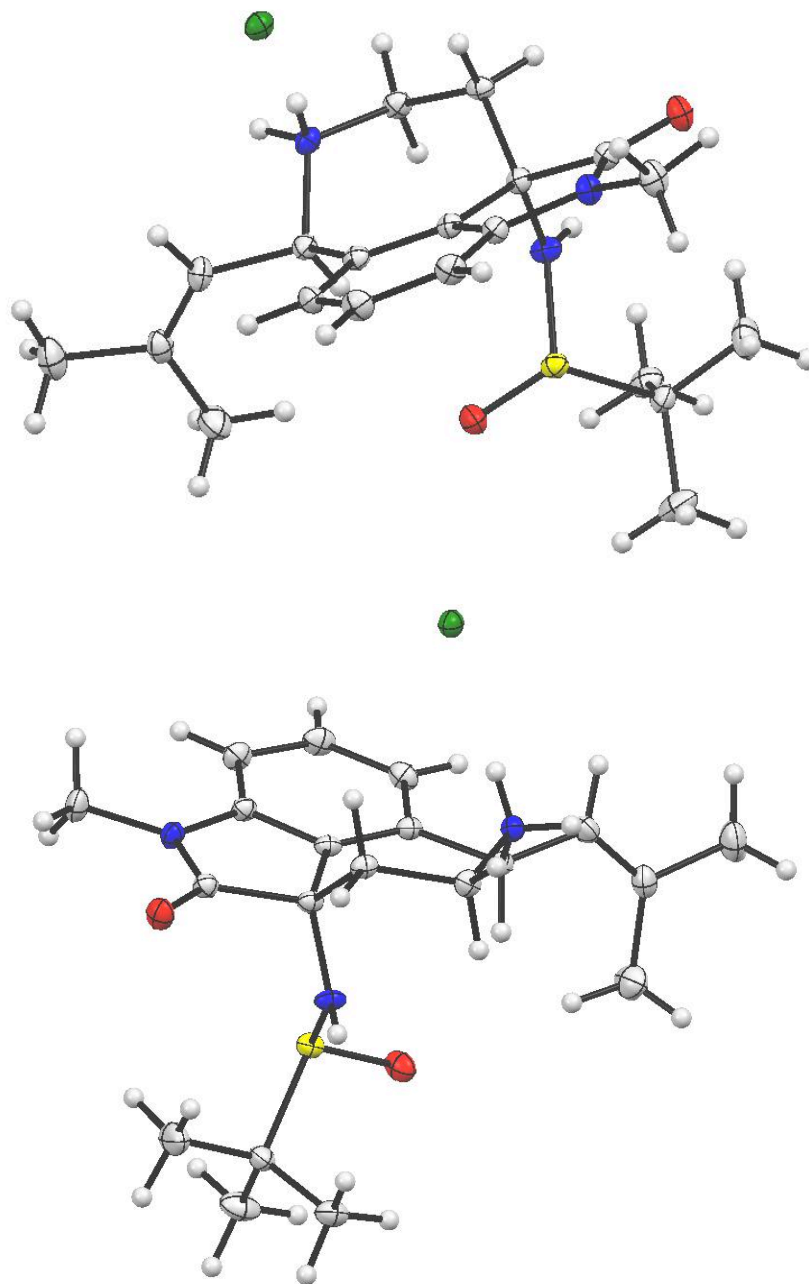

<sup>29</sup> The MIT Department of Chemistry diffractometer was purchased with the help of funding from the National Science Foundation (NSF) under Grant Number CHE-0946721.

<sup>30</sup> Solvent molecules (chloroform) are omitted for clarity.

**Table S3.** Crystal data and structure refinement for azepane (+)-**48**.

|                                   |                                                                                  |          |
|-----------------------------------|----------------------------------------------------------------------------------|----------|
| Identification code               | x8_11213                                                                         |          |
| Empirical formula                 | C <sub>23</sub> H <sub>33</sub> Cl <sub>10</sub> N <sub>3</sub> O <sub>2</sub> S |          |
| Formula weight                    | 770.08                                                                           |          |
| Temperature                       | 100(2) K                                                                         |          |
| Wavelength                        | 0.71073 Å                                                                        |          |
| Crystal system                    | Orthorhombic                                                                     |          |
| Space group                       | P2(1)2(1)2(1)                                                                    |          |
| Unit cell dimensions              | a = 12.4064(6) Å                                                                 | α = 90°. |
|                                   | b = 13.3489(7) Å                                                                 | β = 90°. |
|                                   | c = 20.4516(10) Å                                                                | γ = 90°. |
| Volume                            | 3387.0(3) Å <sup>3</sup>                                                         |          |
| Z                                 | 4                                                                                |          |
| Density (calculated)              | 1.510 Mg/m <sup>3</sup>                                                          |          |
| Absorption coefficient            | 0.912 mm <sup>-1</sup>                                                           |          |
| F(000)                            | 1576                                                                             |          |
| Crystal size                      | 0.30 x 0.05 x 0.05 mm <sup>3</sup>                                               |          |
| Theta range for data collection   | 1.82 to 30.27°.                                                                  |          |
| Index ranges                      | -17<=h<=17, -18<=k<=18, -29<=l<=29                                               |          |
| Reflections collected             | 76009                                                                            |          |
| Independent reflections           | 10104 [R(int) = 0.0459]                                                          |          |
| Completeness to theta = 30.27°    | 100.0 %                                                                          |          |
| Absorption correction             | None                                                                             |          |
| Max. and min. transmission        | 0.9558 and 0.7715                                                                |          |
| Refinement method                 | Full-matrix least-squares on F <sup>2</sup>                                      |          |
| Data / restraints / parameters    | 10104 / 3 / 367                                                                  |          |
| Goodness-of-fit on F <sup>2</sup> | 1.041                                                                            |          |
| Final R indices [I>2sigma(I)]     | R1 = 0.0270, wR2 = 0.0594                                                        |          |
| R indices (all data)              | R1 = 0.0325, wR2 = 0.0617                                                        |          |
| Absolute structure parameter      | -0.03(3)                                                                         |          |
| Largest diff. peak and hole       | 0.433 and -0.393 e.Å <sup>-3</sup>                                               |          |

**Table S4.** Atomic coordinates ( $\times 10^4$ ) and equivalent isotropic displacement parameters ( $\text{\AA}^2 \times 10^3$ ) for azepane (+)-**48**. U(eq) is defined as one third of the trace of the orthogonalized  $U^{ij}$  tensor.

|        | x        | y        | z       | U(eq) |
|--------|----------|----------|---------|-------|
| S(1)   | 3364(1)  | 1739(1)  | 1836(1) | 14(1) |
| O(1)   | 2686(1)  | 838(1)   | -25(1)  | 20(1) |
| O(2)   | 4028(1)  | 2325(1)  | 2308(1) | 21(1) |
| N(1)   | 3828(1)  | -198(1)  | 542(1)  | 15(1) |
| N(2)   | 6356(1)  | 2708(1)  | 637(1)  | 15(1) |
| N(3)   | 3586(1)  | 2162(1)  | 1085(1) | 15(1) |
| C(2)   | 3461(1)  | 705(1)   | 332(1)  | 14(1) |
| C(3)   | 4191(1)  | 1530(1)  | 627(1)  | 13(1) |
| C(4)   | 5038(1)  | 917(1)   | 980(1)  | 13(1) |
| C(5)   | 5954(1)  | 1216(1)  | 1311(1) | 13(1) |
| C(6)   | 6573(1)  | 468(1)   | 1609(1) | 17(1) |
| C(7)   | 6288(1)  | -535(1)  | 1555(1) | 19(1) |
| C(8)   | 5390(1)  | -842(1)  | 1201(1) | 17(1) |
| C(9)   | 4774(1)  | -92(1)   | 919(1)  | 14(1) |
| C(10)  | 3359(1)  | -1151(1) | 358(1)  | 20(1) |
| C(11)  | 4651(1)  | 2173(1)  | 75(1)   | 14(1) |
| C(12)  | 5335(1)  | 3040(1)  | 313(1)  | 16(1) |
| C(13)  | 6277(1)  | 2313(1)  | 1336(1) | 14(1) |
| C(14)  | 7356(1)  | 2528(1)  | 1640(1) | 18(1) |
| C(15)  | 7529(1)  | 3036(1)  | 2190(1) | 19(1) |
| C(16)  | 8659(2)  | 3305(1)  | 2397(1) | 28(1) |
| C(17)  | 6672(2)  | 3381(2)  | 2652(1) | 27(1) |
| C(18)  | 1966(1)  | 2167(1)  | 1953(1) | 17(1) |
| C(19)  | 1284(2)  | 1652(2)  | 1437(1) | 32(1) |
| C(20)  | 1673(2)  | 1808(1)  | 2640(1) | 26(1) |
| C(21)  | 1895(1)  | 3299(1)  | 1909(1) | 20(1) |
| C(1S)  | 11155(2) | 5709(1)  | 1041(1) | 24(1) |
| Cl(1)  | 11132(1) | 6846(1)  | 608(1)  | 41(1) |
| Cl(2)  | 11599(1) | 5912(1)  | 1847(1) | 33(1) |
| Cl(3)  | 9859(1)  | 5162(1)  | 1047(1) | 31(1) |
| C(2S)  | 5900(1)  | 575(1)   | 5840(1) | 21(1) |
| Cl(4)  | 4618(1)  | 527(1)   | 5471(1) | 30(1) |
| Cl(5)  | 6523(1)  | 1738(1)  | 5698(1) | 38(1) |
| Cl(6)  | 5772(1)  | 359(1)   | 6687(1) | 28(1) |
| C(3S)  | 4862(2)  | 781(1)   | 3422(1) | 26(1) |
| Cl(7)  | 5692(1)  | 1445(1)  | 3971(1) | 34(1) |
| Cl(8)  | 3614(1)  | 477(1)   | 3797(1) | 36(1) |
| Cl(9)  | 5508(1)  | -328(1)  | 3175(1) | 31(1) |
| Cl(10) | 7554(1)  | 1070(1)  | -146(1) | 16(1) |



**Table S5.** Bond lengths [Å] and angles [°] for azepane (+)-**48**.

|                  |            |                   |            |
|------------------|------------|-------------------|------------|
| S(1)-O(2)        | 1.4910(12) | N(1)-C(2)-C(3)    | 108.20(12) |
| S(1)-N(3)        | 1.6578(13) | N(3)-C(3)-C(4)    | 111.12(12) |
| S(1)-C(18)       | 1.8422(16) | N(3)-C(3)-C(11)   | 109.88(12) |
| O(1)-C(2)        | 1.2205(19) | C(4)-C(3)-C(11)   | 113.37(12) |
| N(1)-C(2)        | 1.3586(19) | N(3)-C(3)-C(2)    | 110.96(12) |
| N(1)-C(9)        | 1.4119(19) | C(4)-C(3)-C(2)    | 101.97(11) |
| N(1)-C(10)       | 1.4490(19) | C(11)-C(3)-C(2)   | 109.31(12) |
| N(2)-C(12)       | 1.496(2)   | C(5)-C(4)-C(9)    | 121.11(14) |
| N(2)-C(13)       | 1.527(2)   | C(5)-C(4)-C(3)    | 130.40(13) |
| N(3)-C(3)        | 1.4681(19) | C(9)-C(4)-C(3)    | 108.48(13) |
| C(2)-C(3)        | 1.548(2)   | C(4)-C(5)-C(6)    | 117.30(14) |
| C(3)-C(4)        | 1.515(2)   | C(4)-C(5)-C(13)   | 120.79(13) |
| C(3)-C(11)       | 1.528(2)   | C(6)-C(5)-C(13)   | 121.90(14) |
| C(4)-C(5)        | 1.381(2)   | C(7)-C(6)-C(5)    | 120.93(14) |
| C(4)-C(9)        | 1.392(2)   | C(6)-C(7)-C(8)    | 121.96(14) |
| C(5)-C(6)        | 1.399(2)   | C(9)-C(8)-C(7)    | 116.43(14) |
| C(5)-C(13)       | 1.519(2)   | C(8)-C(9)-C(4)    | 122.19(14) |
| C(6)-C(7)        | 1.389(2)   | C(8)-C(9)-N(1)    | 127.84(14) |
| C(7)-C(8)        | 1.391(2)   | C(4)-C(9)-N(1)    | 109.97(13) |
| C(8)-C(9)        | 1.386(2)   | C(12)-C(11)-C(3)  | 113.58(12) |
| C(11)-C(12)      | 1.516(2)   | N(2)-C(12)-C(11)  | 112.97(12) |
| C(13)-C(14)      | 1.504(2)   | C(14)-C(13)-C(5)  | 115.65(13) |
| C(14)-C(15)      | 1.329(2)   | C(14)-C(13)-N(2)  | 105.36(12) |
| C(15)-C(17)      | 1.496(2)   | C(5)-C(13)-N(2)   | 108.58(12) |
| C(15)-C(16)      | 1.508(2)   | C(15)-C(14)-C(13) | 126.28(15) |
| C(18)-C(21)      | 1.516(2)   | C(14)-C(15)-C(17) | 125.15(15) |
| C(18)-C(19)      | 1.518(2)   | C(14)-C(15)-C(16) | 120.67(16) |
| C(18)-C(20)      | 1.528(2)   | C(17)-C(15)-C(16) | 114.17(15) |
| C(1S)-Cl(1)      | 1.7576(18) | C(21)-C(18)-C(19) | 112.26(15) |
| C(1S)-Cl(2)      | 1.7600(19) | C(21)-C(18)-C(20) | 110.70(14) |
| C(1S)-Cl(3)      | 1.7659(19) | C(19)-C(18)-C(20) | 111.40(15) |
| C(2S)-Cl(5)      | 1.7584(18) | C(21)-C(18)-S(1)  | 110.81(11) |
| C(2S)-Cl(4)      | 1.7626(18) | C(19)-C(18)-S(1)  | 107.09(11) |
| C(2S)-Cl(6)      | 1.7627(17) | C(20)-C(18)-S(1)  | 104.23(11) |
| C(3S)-Cl(9)      | 1.7572(19) | Cl(1)-C(1S)-Cl(2) | 110.07(10) |
| C(3S)-Cl(7)      | 1.7610(19) | Cl(1)-C(1S)-Cl(3) | 110.25(10) |
| C(3S)-Cl(8)      | 1.774(2)   | Cl(2)-C(1S)-Cl(3) | 110.03(10) |
|                  |            | Cl(5)-C(2S)-Cl(4) | 110.96(9)  |
| O(2)-S(1)-N(3)   | 109.23(7)  | Cl(5)-C(2S)-Cl(6) | 110.25(9)  |
| O(2)-S(1)-C(18)  | 105.89(7)  | Cl(4)-C(2S)-Cl(6) | 109.51(10) |
| N(3)-S(1)-C(18)  | 99.87(7)   | Cl(9)-C(3S)-Cl(7) | 109.86(10) |
| C(2)-N(1)-C(9)   | 111.23(12) | Cl(9)-C(3S)-Cl(8) | 109.25(10) |
| C(2)-N(1)-C(10)  | 124.26(13) | Cl(7)-C(3S)-Cl(8) | 110.48(10) |
| C(9)-N(1)-C(10)  | 124.33(13) |                   |            |
| C(12)-N(2)-C(13) | 117.56(12) |                   |            |
| C(3)-N(3)-S(1)   | 118.73(10) |                   |            |
| O(1)-C(2)-N(1)   | 125.55(14) |                   |            |
| O(1)-C(2)-C(3)   | 126.25(13) |                   |            |

---

Symmetry transformations used to generate equivalent atoms

**Table S6.** Anisotropic displacement parameters ( $\text{\AA}^2 \times 10^3$ ) for azepane (+)-**48**. The anisotropic displacement factor exponent takes the form:  $-2\pi^2 [h^2 a^{*2} U^{11} + \dots + 2 h k a^* b^* U^{12}]$ .

|        | U <sup>11</sup> | U <sup>22</sup> | U <sup>33</sup> | U <sup>23</sup> | U <sup>13</sup> | U <sup>12</sup> |
|--------|-----------------|-----------------|-----------------|-----------------|-----------------|-----------------|
| S(1)   | 14(1)           | 15(1)           | 14(1)           | 2(1)            | 1(1)            | 2(1)            |
| O(1)   | 17(1)           | 18(1)           | 23(1)           | 1(1)            | -6(1)           | 1(1)            |
| O(2)   | 16(1)           | 29(1)           | 17(1)           | -1(1)           | -3(1)           | 0(1)            |
| N(1)   | 15(1)           | 11(1)           | 19(1)           | 0(1)            | -2(1)           | 0(1)            |
| N(2)   | 14(1)           | 13(1)           | 17(1)           | 0(1)            | 2(1)            | -1(1)           |
| N(3)   | 17(1)           | 13(1)           | 14(1)           | 2(1)            | 3(1)            | 6(1)            |
| C(2)   | 14(1)           | 13(1)           | 16(1)           | 1(1)            | 1(1)            | 1(1)            |
| C(3)   | 13(1)           | 12(1)           | 14(1)           | 0(1)            | 1(1)            | 2(1)            |
| C(4)   | 13(1)           | 13(1)           | 13(1)           | 1(1)            | 1(1)            | 3(1)            |
| C(5)   | 14(1)           | 13(1)           | 13(1)           | 0(1)            | 2(1)            | 2(1)            |
| C(6)   | 15(1)           | 21(1)           | 16(1)           | 3(1)            | -1(1)           | 1(1)            |
| C(7)   | 20(1)           | 17(1)           | 21(1)           | 5(1)            | -1(1)           | 5(1)            |
| C(8)   | 19(1)           | 13(1)           | 20(1)           | 4(1)            | 0(1)            | 2(1)            |
| C(9)   | 14(1)           | 12(1)           | 15(1)           | 1(1)            | 0(1)            | 1(1)            |
| C(10)  | 22(1)           | 12(1)           | 26(1)           | -1(1)           | -5(1)           | -3(1)           |
| C(11)  | 16(1)           | 13(1)           | 13(1)           | 1(1)            | 1(1)            | 2(1)            |
| C(12)  | 17(1)           | 14(1)           | 16(1)           | 3(1)            | 0(1)            | 1(1)            |
| C(13)  | 13(1)           | 15(1)           | 14(1)           | -1(1)           | 1(1)            | -1(1)           |
| C(14)  | 12(1)           | 19(1)           | 24(1)           | 0(1)            | -1(1)           | 0(1)            |
| C(15)  | 17(1)           | 16(1)           | 23(1)           | 3(1)            | -4(1)           | -3(1)           |
| C(16)  | 22(1)           | 24(1)           | 36(1)           | 1(1)            | -9(1)           | -6(1)           |
| C(17)  | 24(1)           | 34(1)           | 23(1)           | -8(1)           | -3(1)           | -1(1)           |
| C(18)  | 13(1)           | 20(1)           | 18(1)           | -1(1)           | 2(1)            | -1(1)           |
| C(19)  | 18(1)           | 41(1)           | 36(1)           | -18(1)          | -2(1)           | -4(1)           |
| C(20)  | 25(1)           | 28(1)           | 26(1)           | 8(1)            | 12(1)           | 5(1)            |
| C(21)  | 20(1)           | 20(1)           | 21(1)           | 1(1)            | 4(1)            | 5(1)            |
| C(1S)  | 27(1)           | 20(1)           | 24(1)           | -2(1)           | 0(1)            | 3(1)            |
| Cl(1)  | 43(1)           | 33(1)           | 48(1)           | 18(1)           | -5(1)           | -3(1)           |
| Cl(2)  | 42(1)           | 27(1)           | 29(1)           | -4(1)           | -11(1)          | 1(1)            |
| Cl(3)  | 33(1)           | 29(1)           | 32(1)           | -3(1)           | -3(1)           | -5(1)           |
| C(2S)  | 26(1)           | 18(1)           | 20(1)           | 0(1)            | -1(1)           | 2(1)            |
| Cl(4)  | 36(1)           | 24(1)           | 30(1)           | 2(1)            | -13(1)          | -5(1)           |
| Cl(5)  | 38(1)           | 27(1)           | 48(1)           | 12(1)           | -14(1)          | -11(1)          |
| Cl(6)  | 21(1)           | 44(1)           | 19(1)           | 0(1)            | 0(1)            | 4(1)            |
| C(3S)  | 32(1)           | 24(1)           | 22(1)           | 4(1)            | -3(1)           | -1(1)           |
| Cl(7)  | 44(1)           | 24(1)           | 36(1)           | -5(1)           | -5(1)           | -6(1)           |
| Cl(8)  | 25(1)           | 46(1)           | 36(1)           | 1(1)            | 2(1)            | 4(1)            |
| Cl(9)  | 35(1)           | 26(1)           | 31(1)           | -6(1)           | 8(1)            | -3(1)           |
| Cl(10) | 18(1)           | 14(1)           | 18(1)           | 0(1)            | 2(1)            | -1(1)           |

**Table S7.** Hydrogen coordinates ( $\times 10^4$ ) and isotropic displacement parameters ( $\text{\AA}^2 \times 10^{-3}$ ) for azepane (+)-**48**.

|        | x        | y        | z      | U(eq) |
|--------|----------|----------|--------|-------|
| H(1N)  | 6799(14) | 3209(13) | 631(9) | 18    |
| H(2N)  | 6670(15) | 2284(13) | 382(9) | 18    |
| H(3N)  | 3219(15) | 2647(13) | 925(9) | 18    |
| H(6)   | 7196     | 649      | 1851   | 20    |
| H(7)   | 6719     | -1025    | 1767   | 23    |
| H(8)   | 5208     | -1530    | 1156   | 21    |
| H(10A) | 2796     | -1042    | 29     | 30    |
| H(10B) | 3042     | -1471    | 745    | 30    |
| H(10C) | 3920     | -1586    | 176    | 30    |
| H(11A) | 5094     | 1744     | -214   | 17    |
| H(11B) | 4047     | 2441     | -189   | 17    |
| H(12A) | 5517     | 3475     | -63    | 19    |
| H(12B) | 4910     | 3444     | 627    | 19    |
| H(13)  | 5709     | 2698     | 1575   | 17    |
| H(14)  | 7972     | 2277     | 1419   | 22    |
| H(16A) | 9177     | 2999     | 2096   | 41    |
| H(16B) | 8789     | 3056     | 2841   | 41    |
| H(16C) | 8745     | 4035     | 2390   | 41    |
| H(17A) | 5965     | 3162     | 2492   | 41    |
| H(17B) | 6685     | 4113     | 2681   | 41    |
| H(17C) | 6802     | 3093     | 3086   | 41    |
| H(19A) | 1410     | 927      | 1454   | 47    |
| H(19B) | 1481     | 1905     | 1003   | 47    |
| H(19C) | 520      | 1789     | 1519   | 47    |
| H(20A) | 924      | 1987     | 2736   | 40    |
| H(20B) | 2151     | 2126     | 2959   | 40    |
| H(20C) | 1757     | 1078     | 2664   | 40    |
| H(21A) | 2091     | 3515     | 1467   | 30    |
| H(21B) | 2393     | 3600     | 2225   | 30    |
| H(21C) | 1157     | 3514     | 2007   | 30    |
| H(1S)  | 11666    | 5240     | 819    | 29    |
| H(2S)  | 6360     | 35       | 5648   | 26    |
| H(3S)  | 4723     | 1207     | 3029   | 31    |

$^1\text{H}$  NMR, 400 MHz,  $\text{CDCl}_3$ , 25  $^\circ\text{C}$

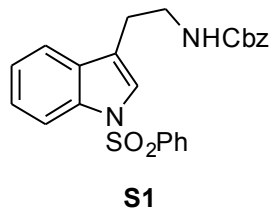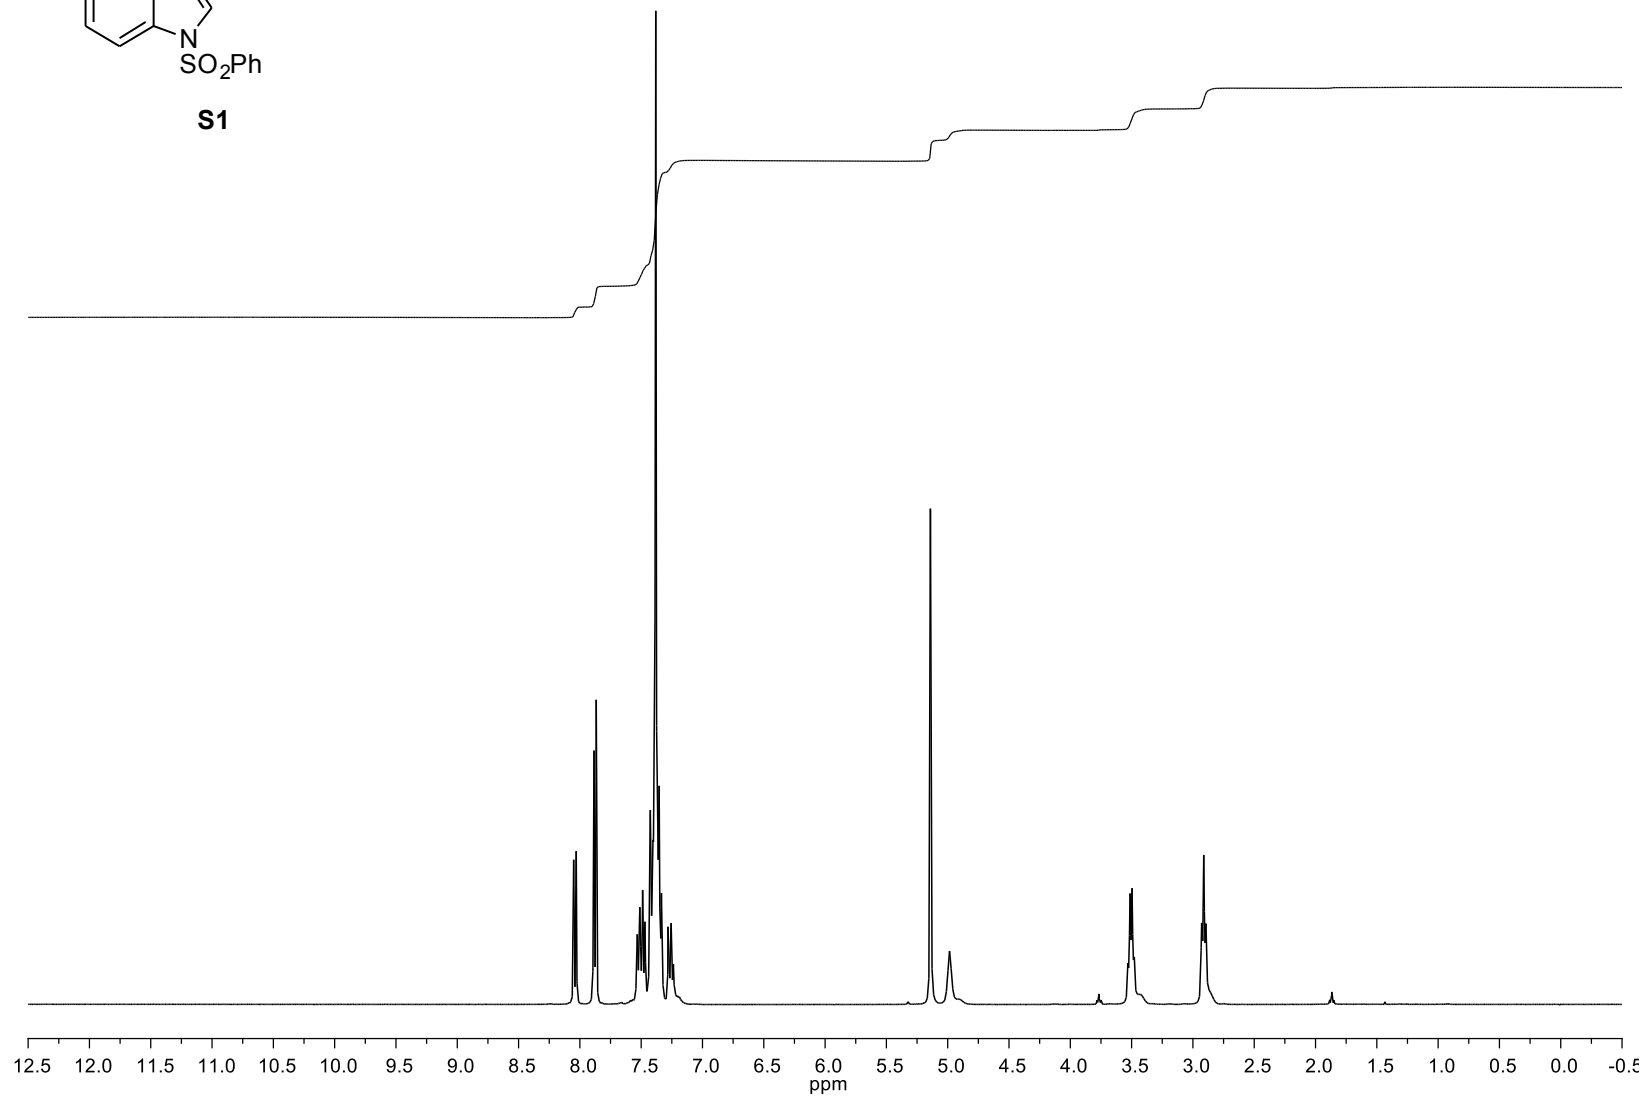

$^{13}\text{C}$  NMR, 100 MHz,  $\text{CDCl}_3$ , 25 °C

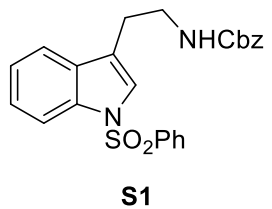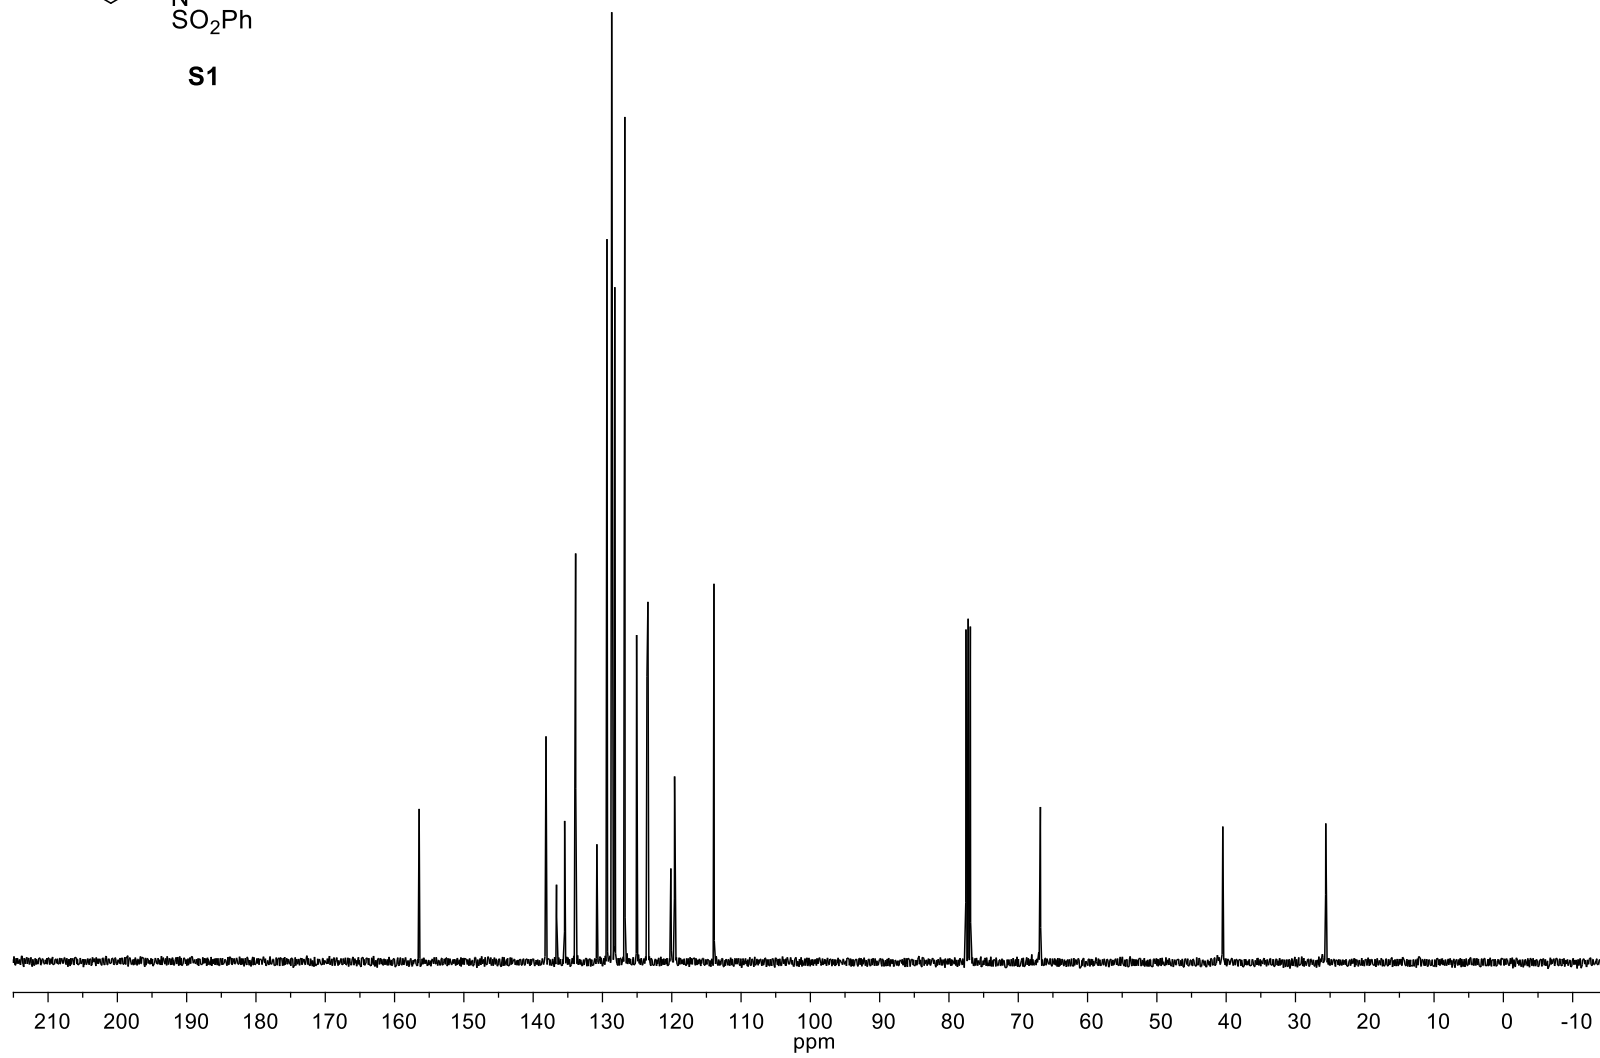

$^1\text{H}$  NMR, 400 MHz,  $\text{CD}_3\text{CN}$ , 60  $^\circ\text{C}$

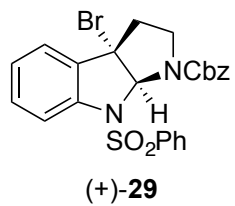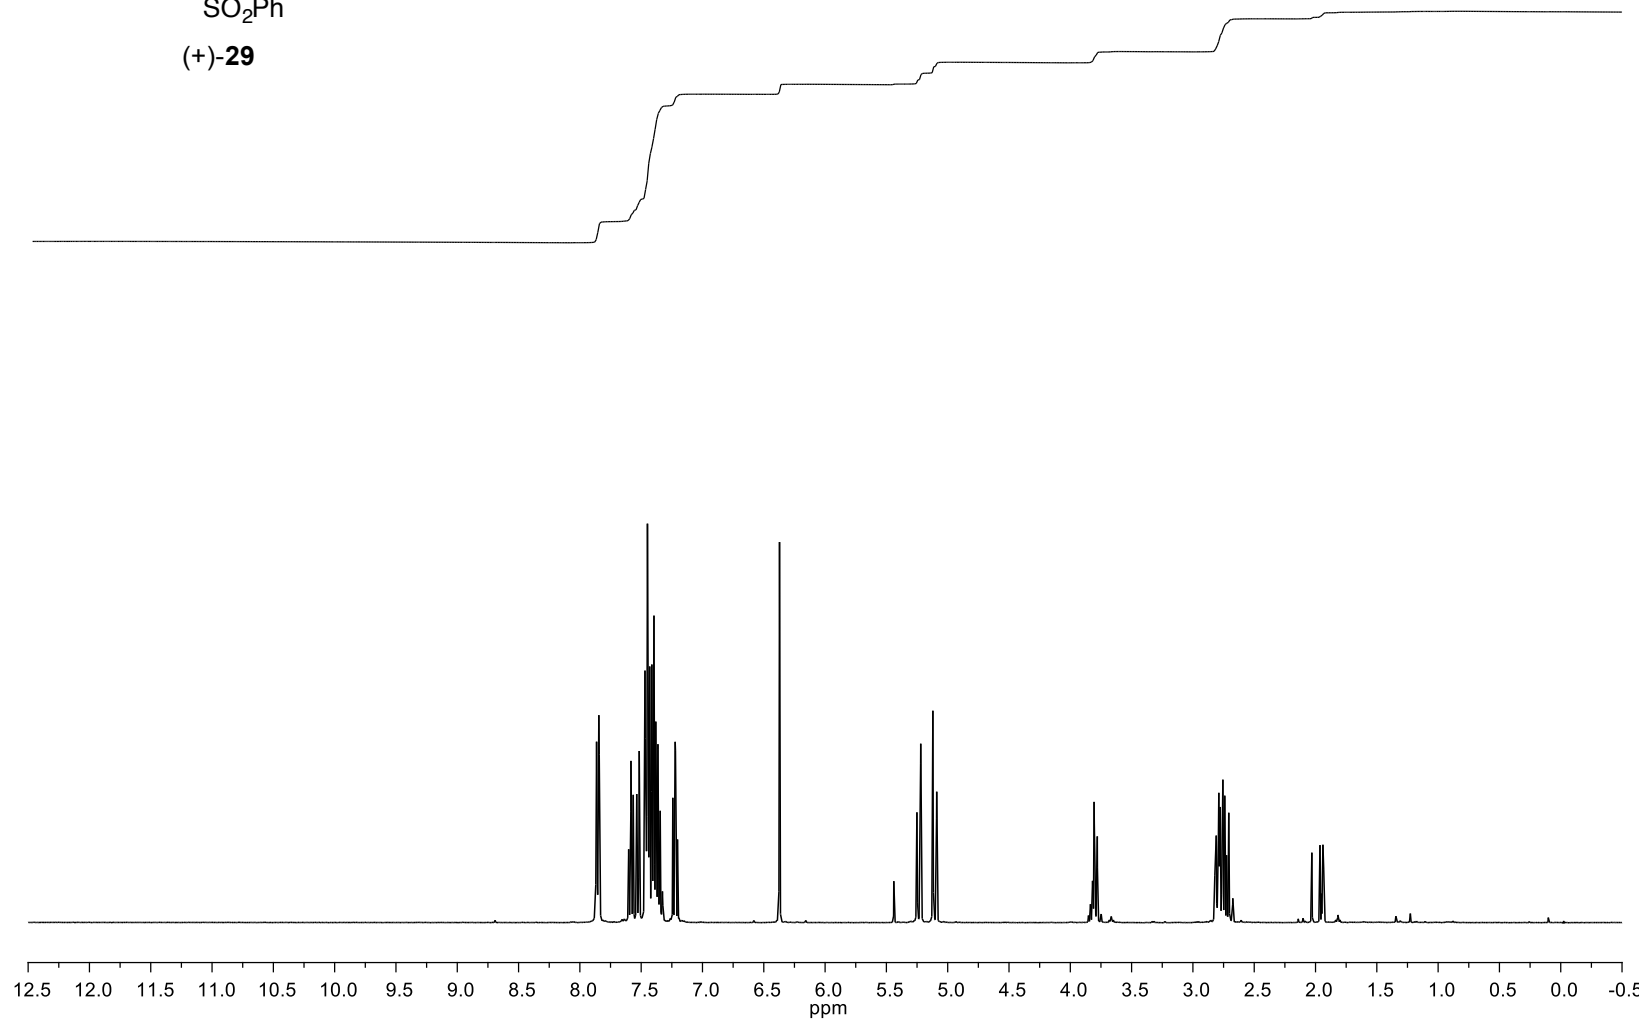

$^{13}\text{C}$  NMR, 100 MHz,  $\text{CD}_3\text{CN}$ , 60  $^\circ\text{C}$

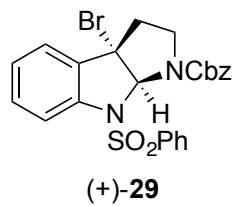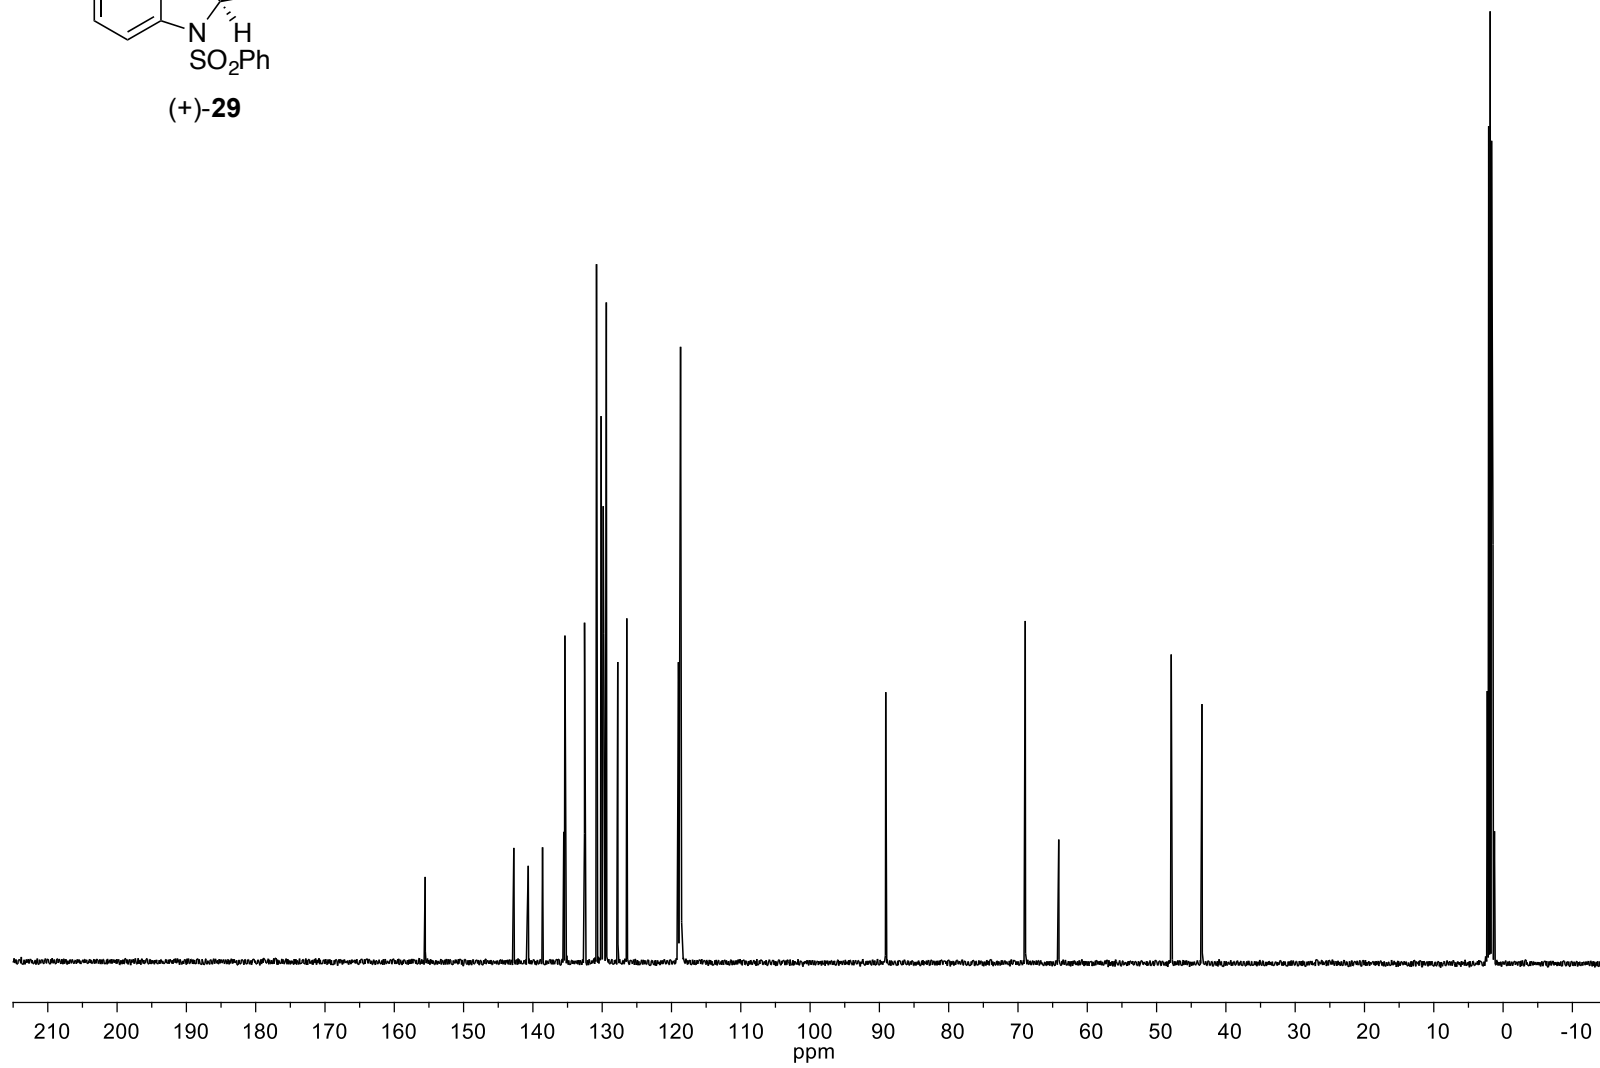

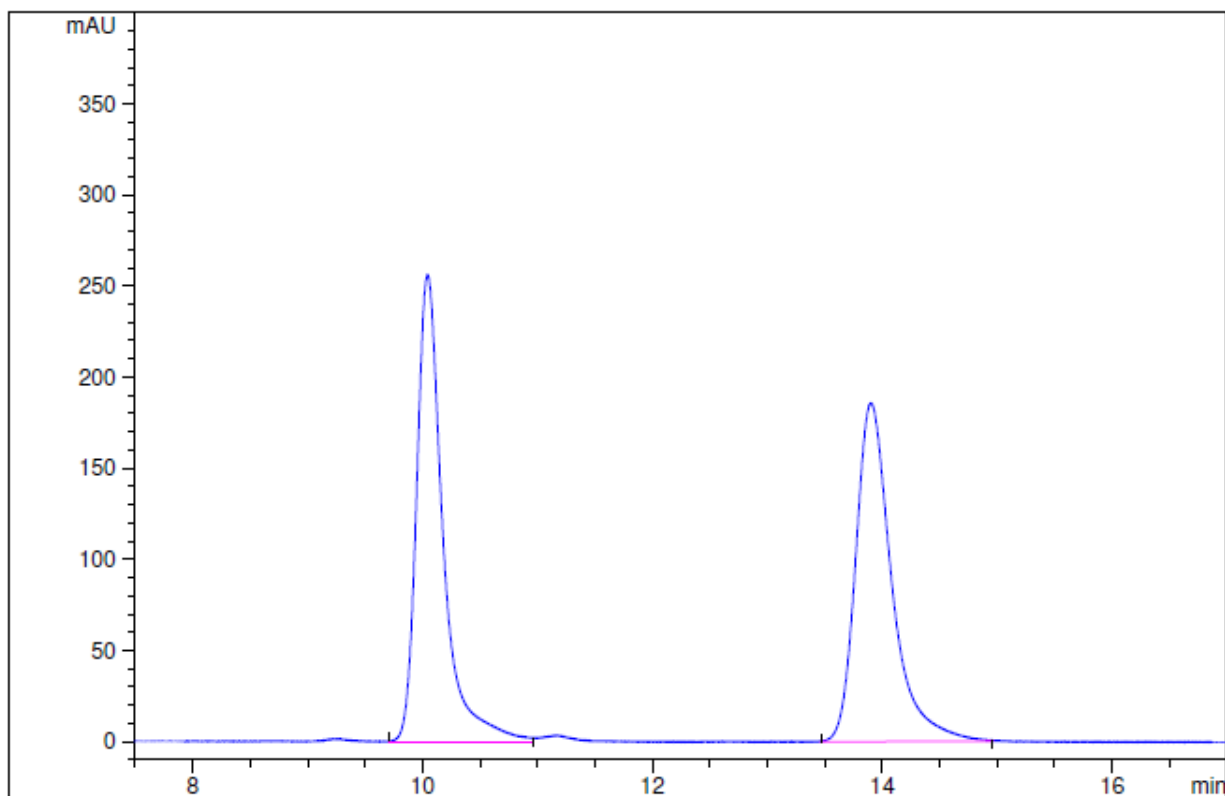

| # | Meas. Ret. Time | Area % |
|---|-----------------|--------|
| 1 | 10.044          | 50.177 |
| 2 | 13.901          | 49.823 |

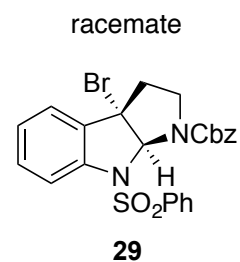

Chiralpak IA  
40% *i*-PrOH / 60% hexanes  
0.75 mL / min  
254 nm



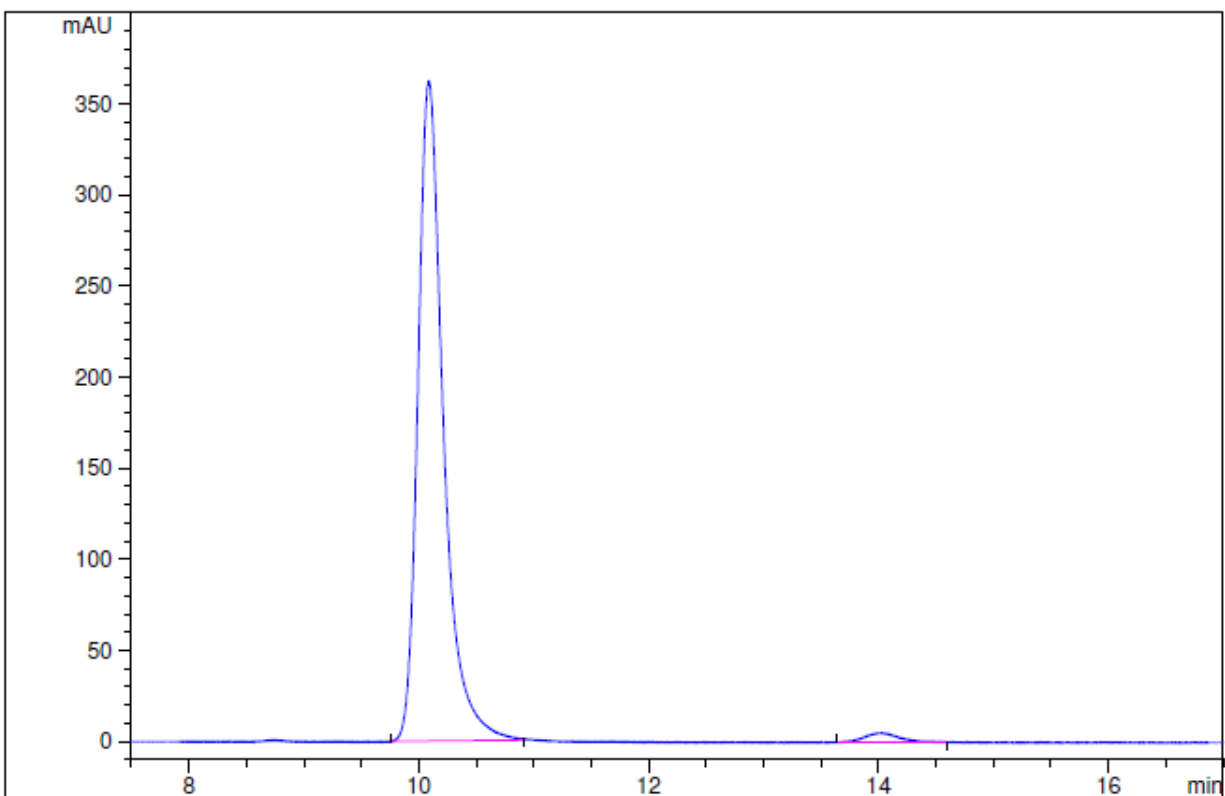

| # | Meas. Ret. Time | Area % |
|---|-----------------|--------|
| 1 | 10.088          | 98.102 |
| 2 | 14.024          | 1.898  |

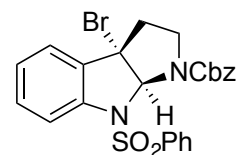

(+)-29

Chiralpak IA  
40% *i*-PrOH / 60% hexanes  
0.75 mL / min  
254 nm

$^1\text{H}$  NMR, 400 MHz,  $\text{CD}_3\text{CN}$ , 60 °C

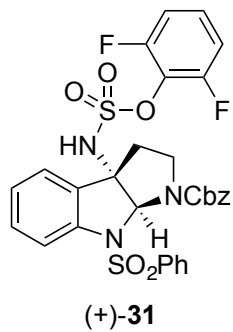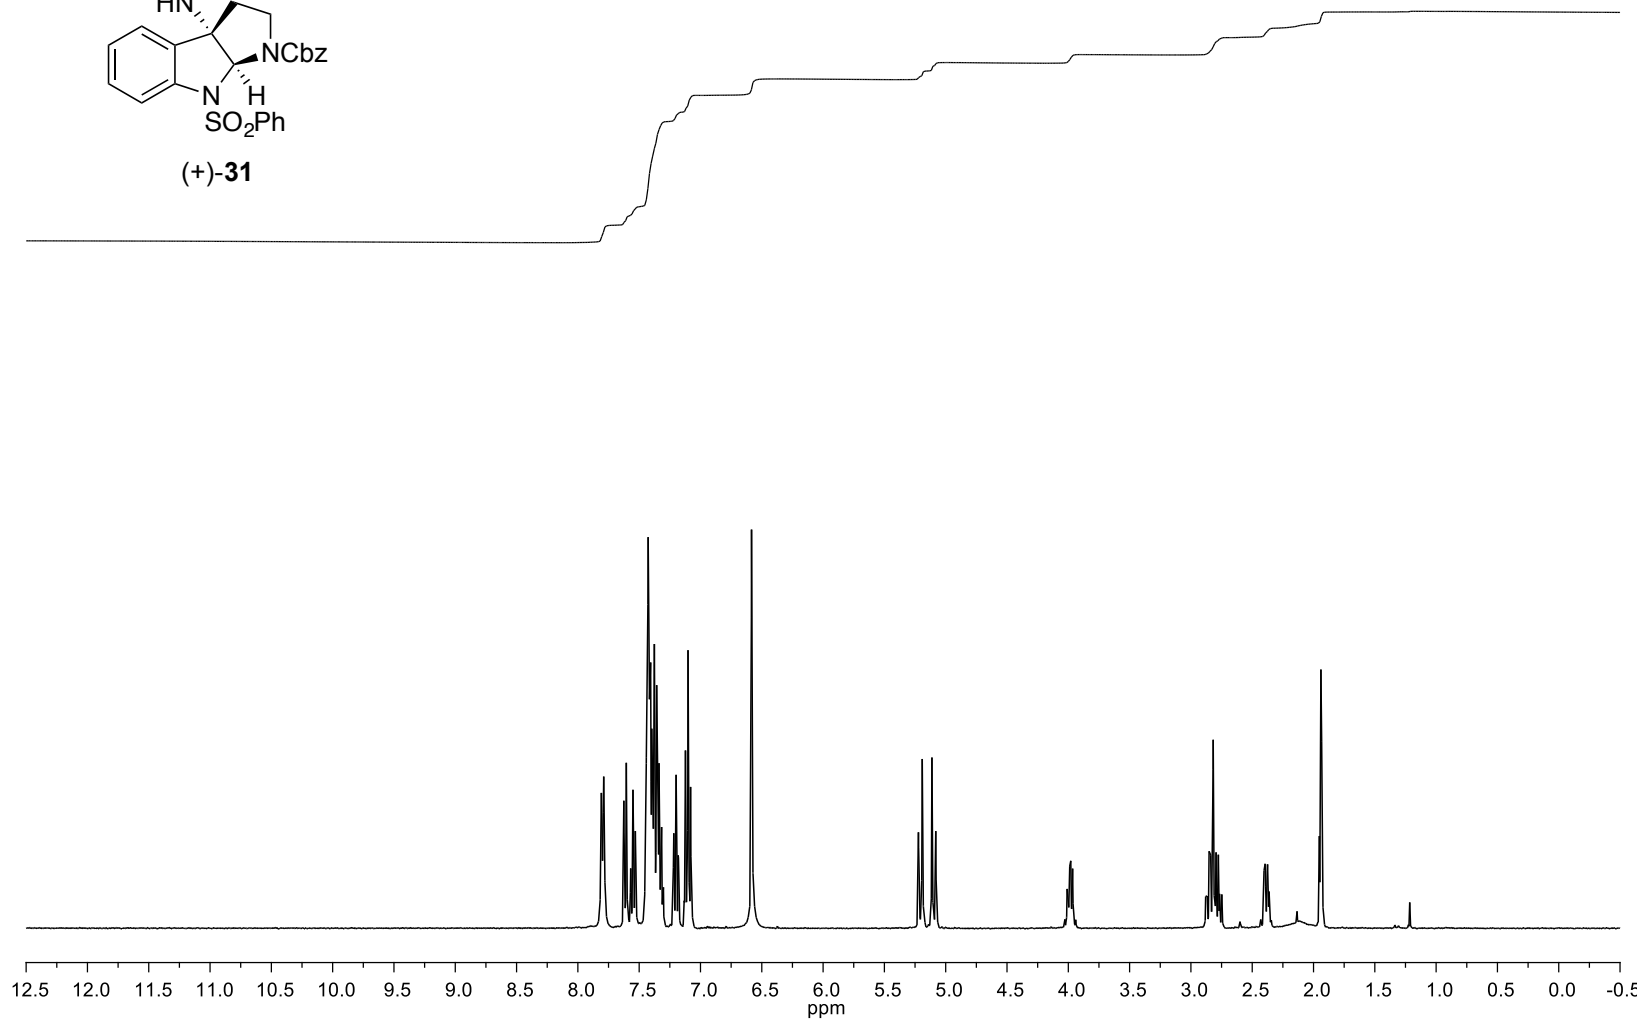

$^{13}\text{C}$  NMR, 100 MHz,  $\text{CD}_3\text{CN}$ , 60 °C

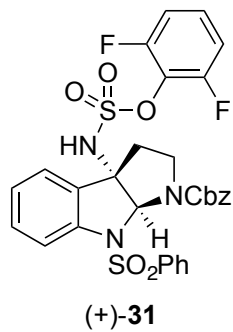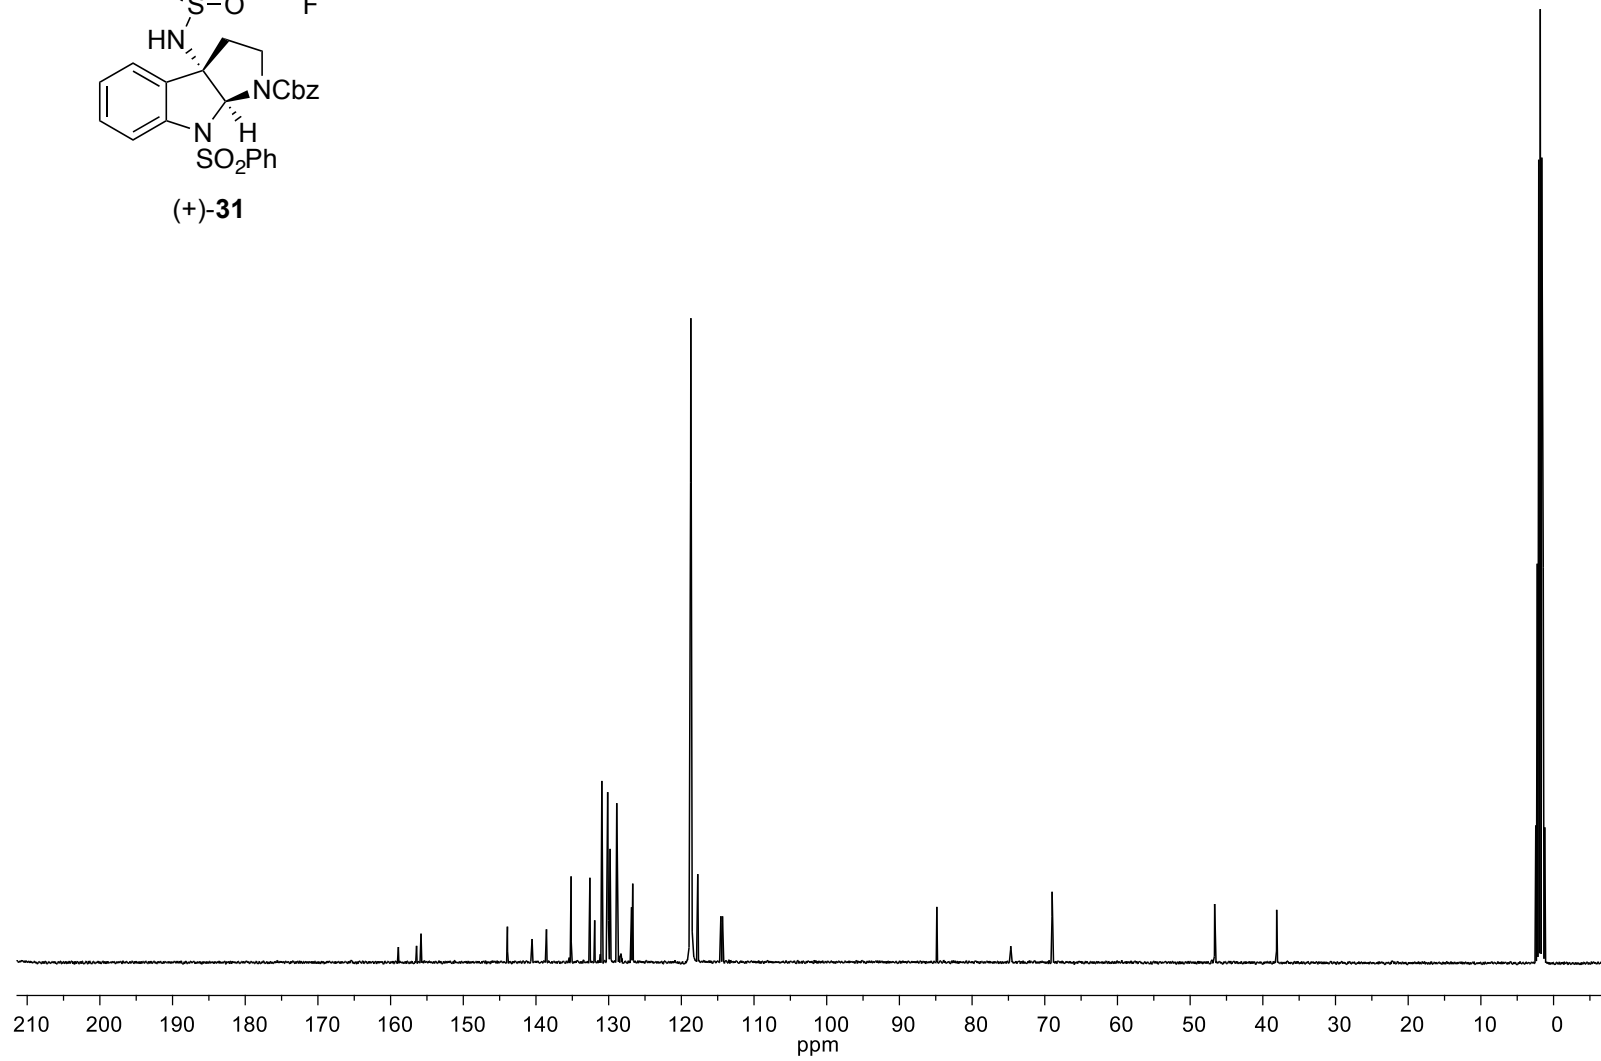

$^{19}\text{F}$  NMR, 282 MHz,  $\text{CD}_3\text{CN}$ , 20 °C

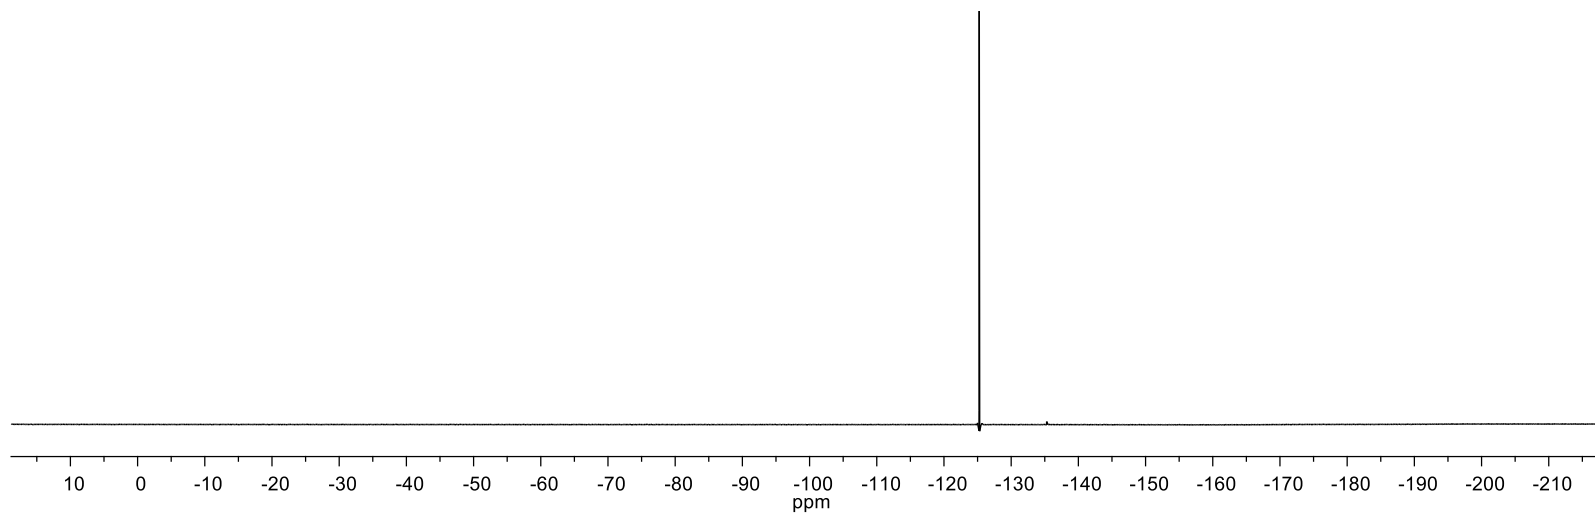

$^1\text{H}$  NMR, 500 MHz,  $\text{CD}_3\text{CN}$ , 60  $^\circ\text{C}$

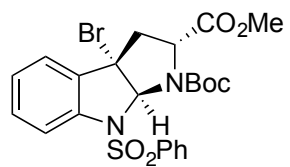

**(+)-32**

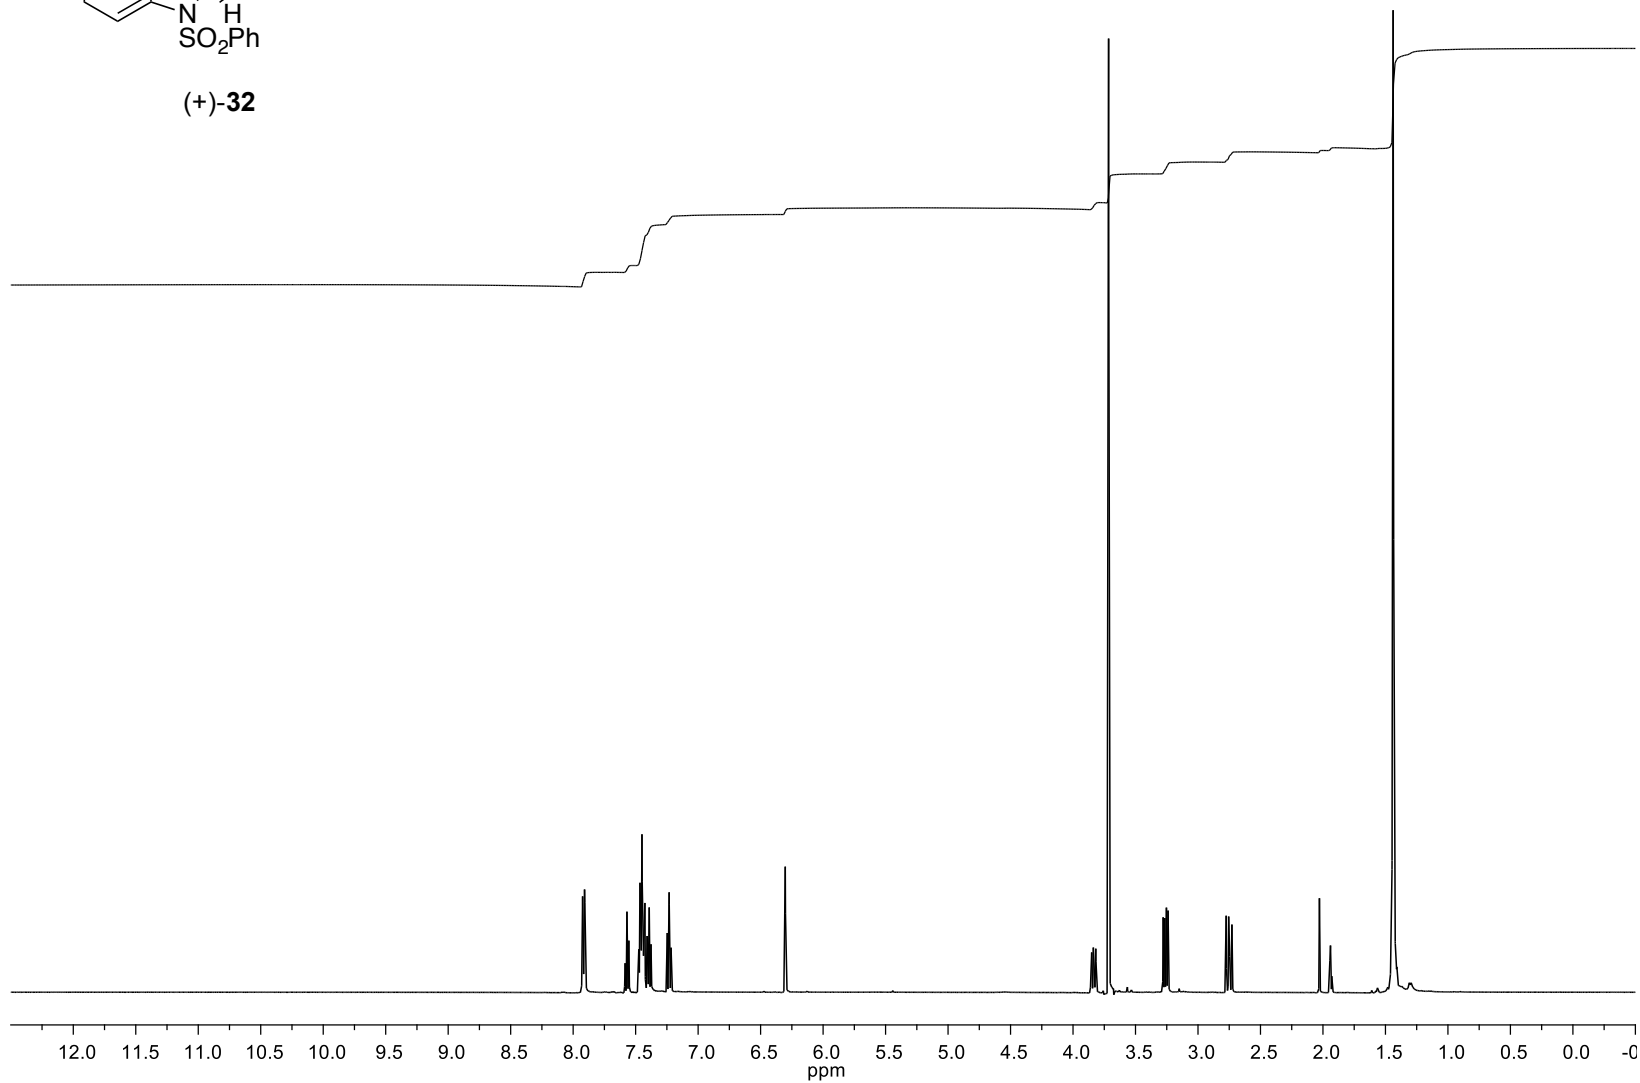

$^{13}\text{C}$  NMR, 126 MHz,  $\text{CD}_3\text{CN}$ , 60 °C

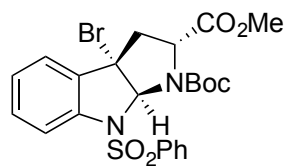

**(+)-32**

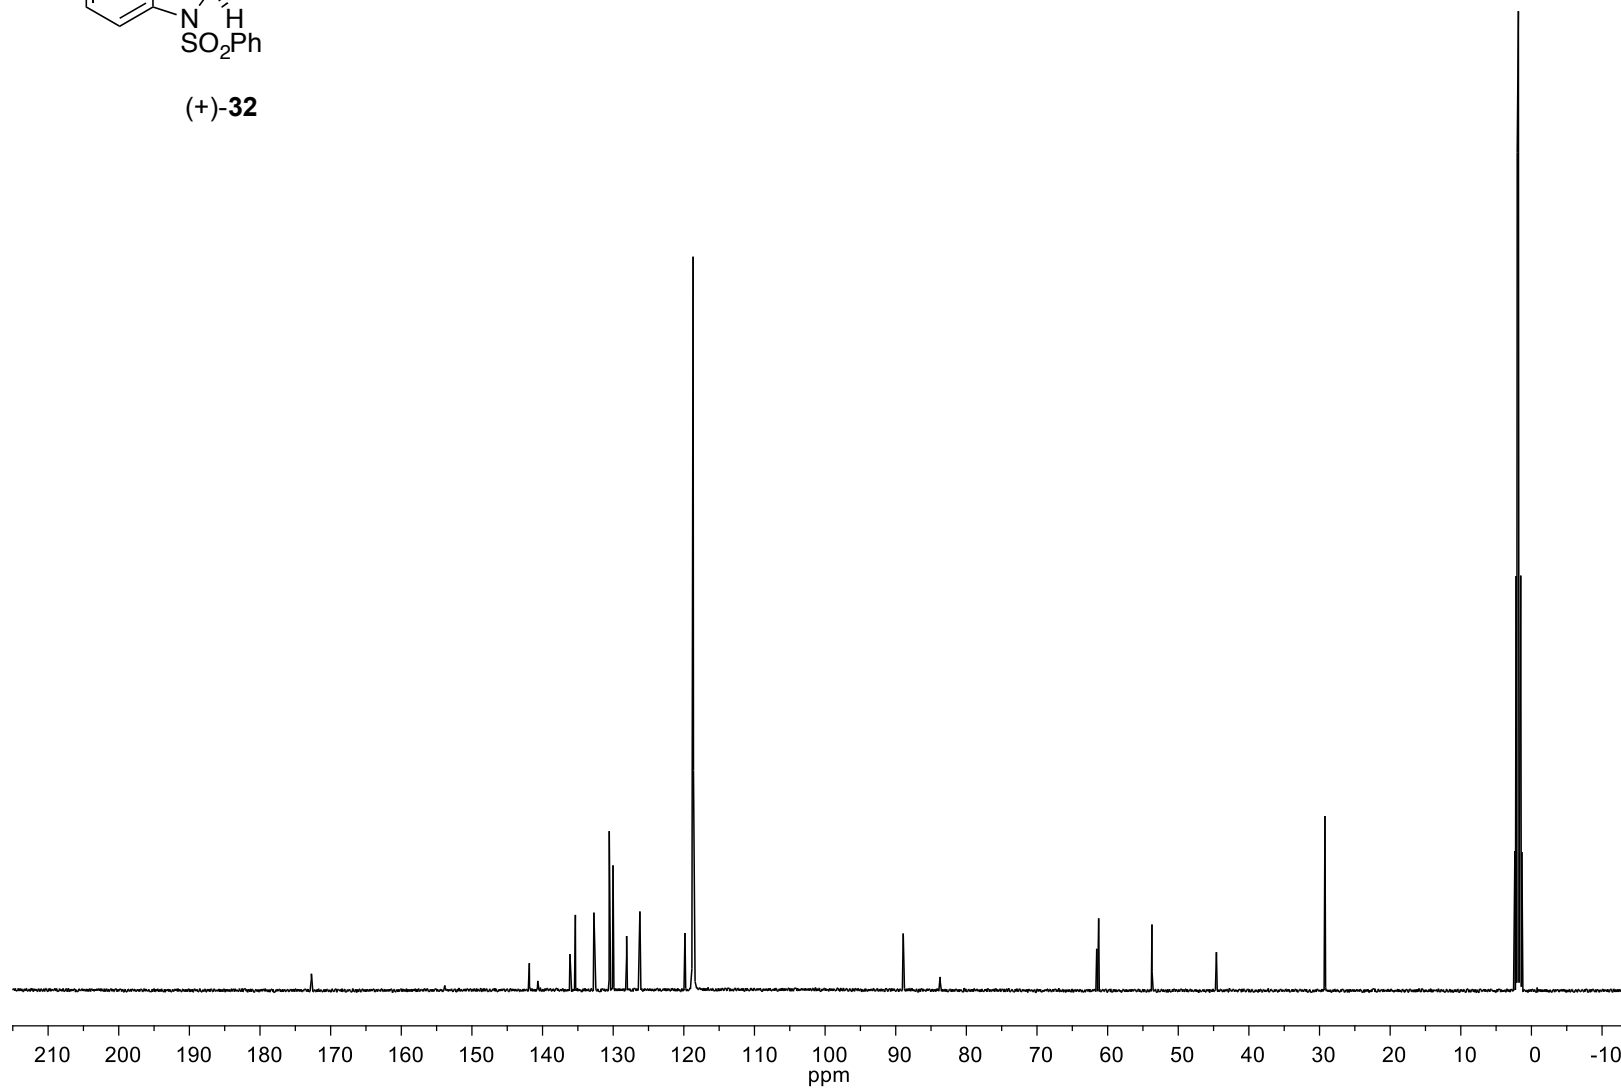

$^1\text{H}$  NMR, 500 MHz,  $\text{CD}_3\text{CN}$ , 60  $^\circ\text{C}$

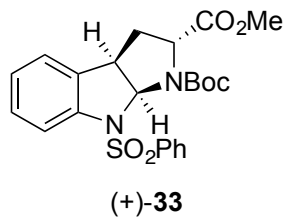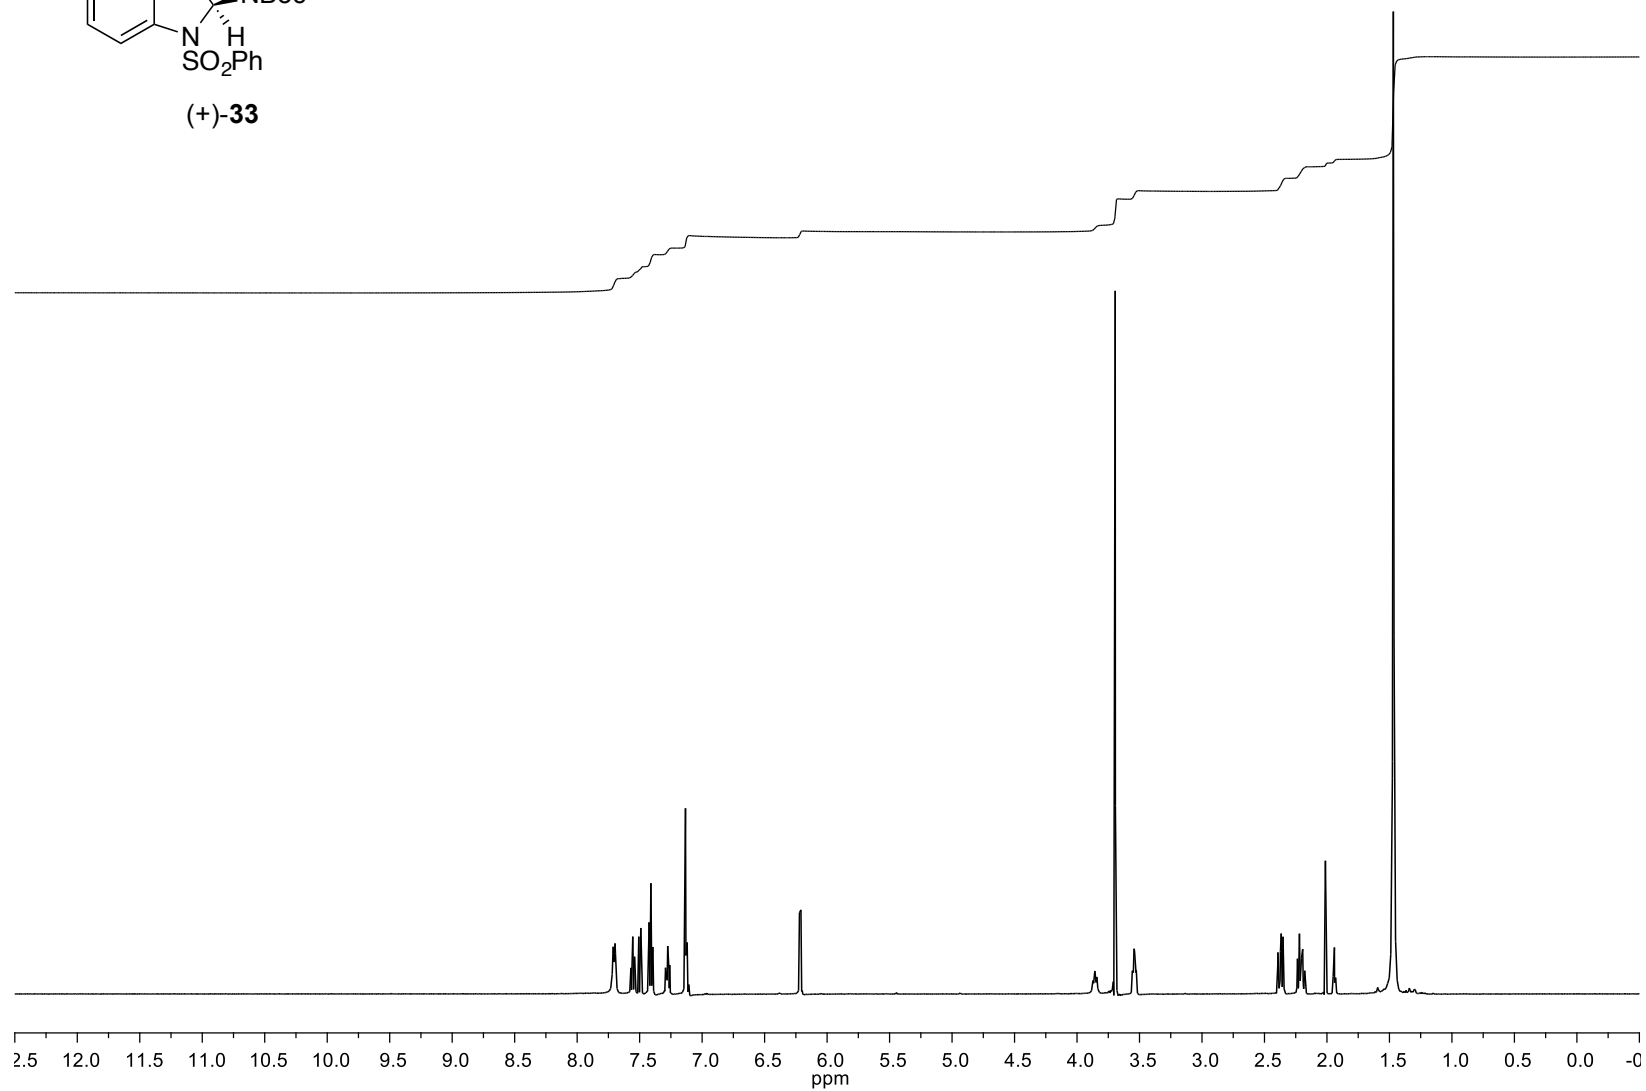

$^{13}\text{C}$  NMR, 126 MHz,  $\text{CD}_3\text{CN}$ , 60 °C

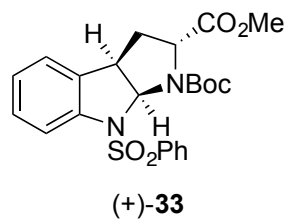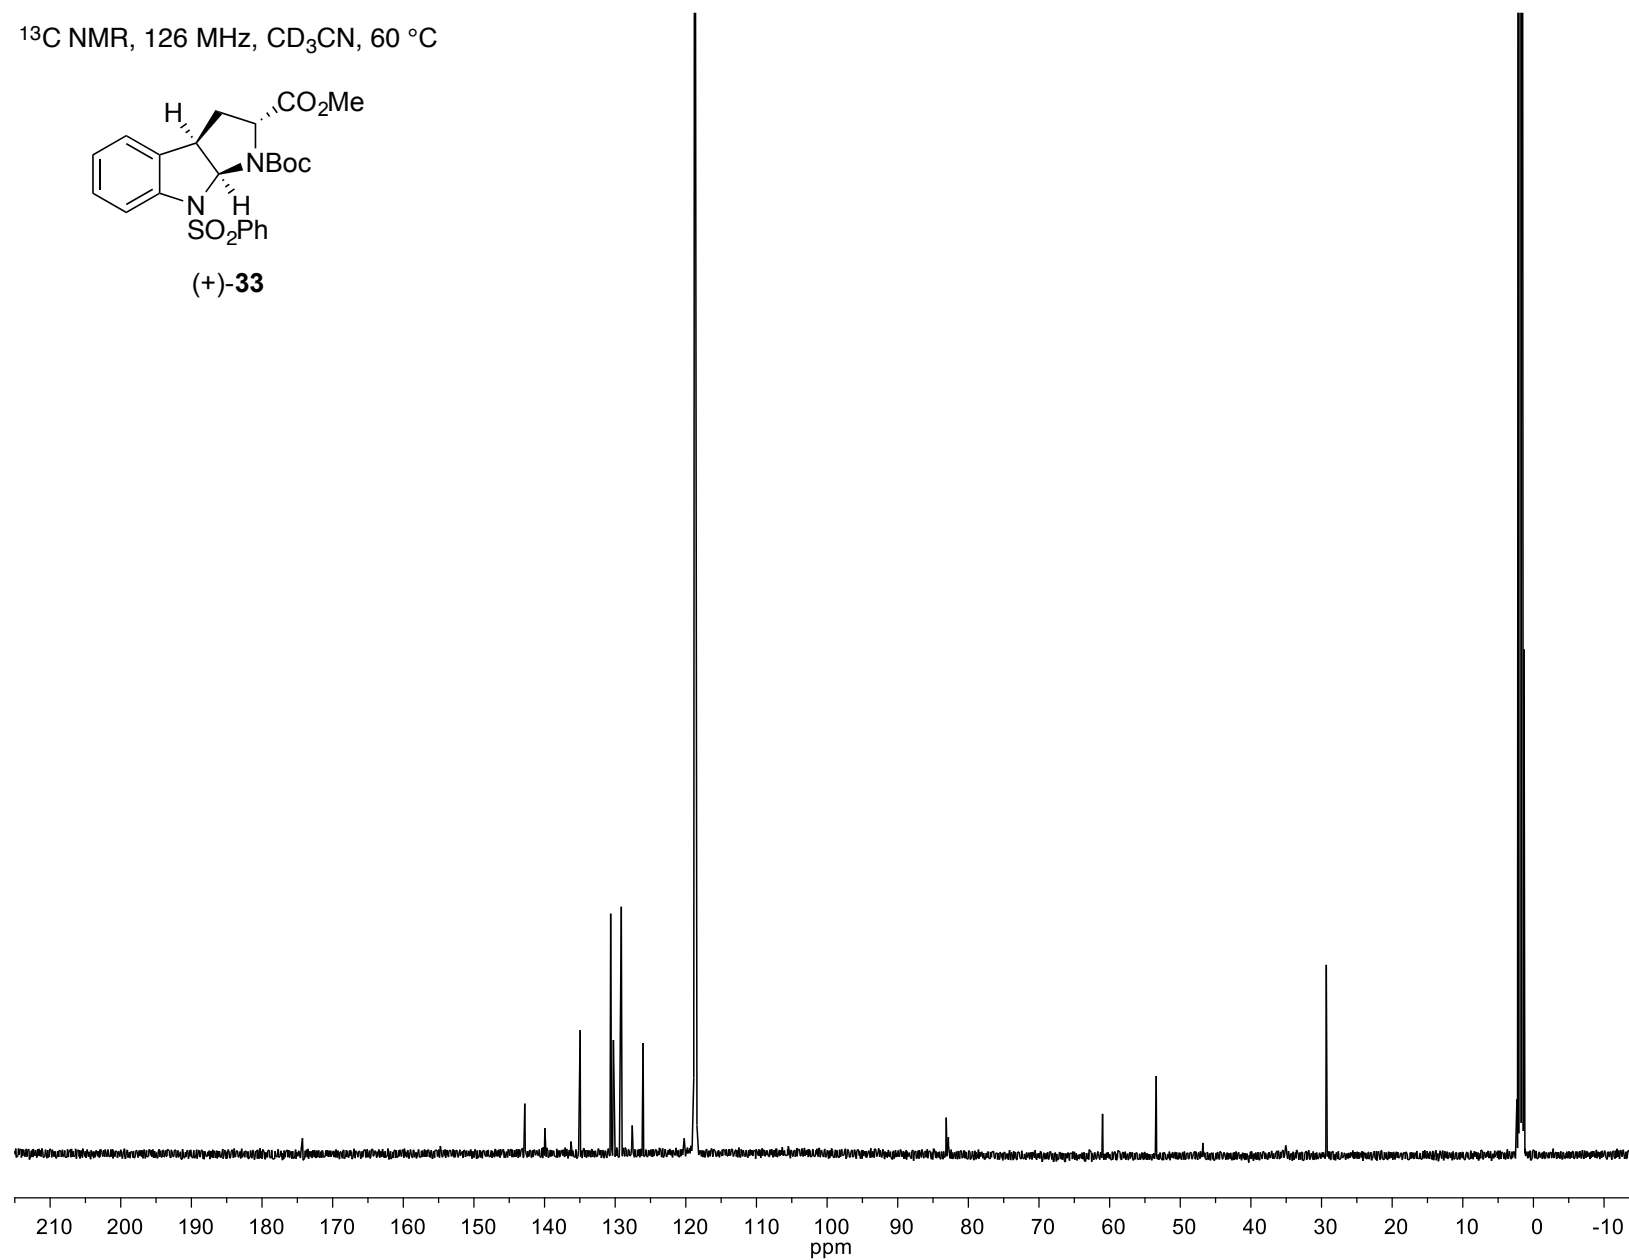



$^1\text{H}$  NMR, 500 MHz,  $\text{CD}_3\text{CN}$ , 60  $^\circ\text{C}$

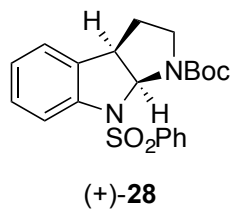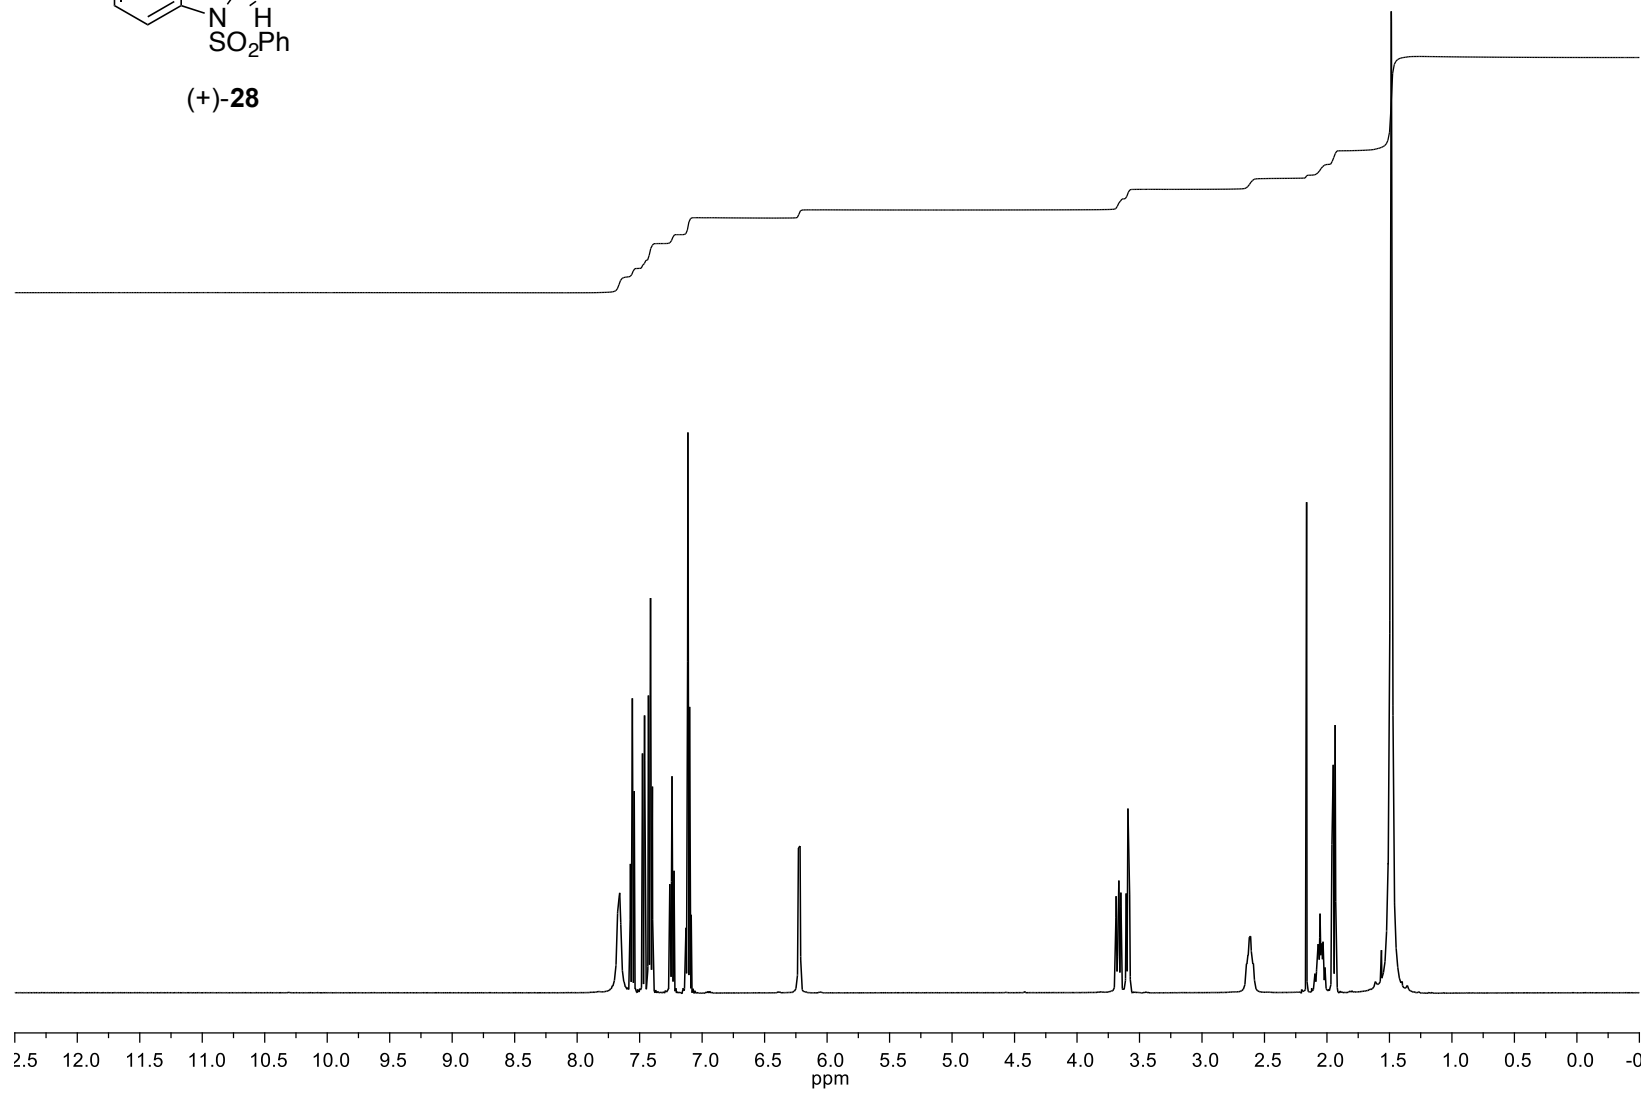

$^{13}\text{C}$  NMR, 126 MHz,  $\text{CD}_3\text{CN}$ , 60 °C

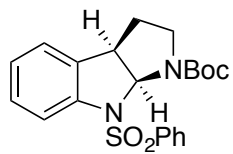

(+)-28

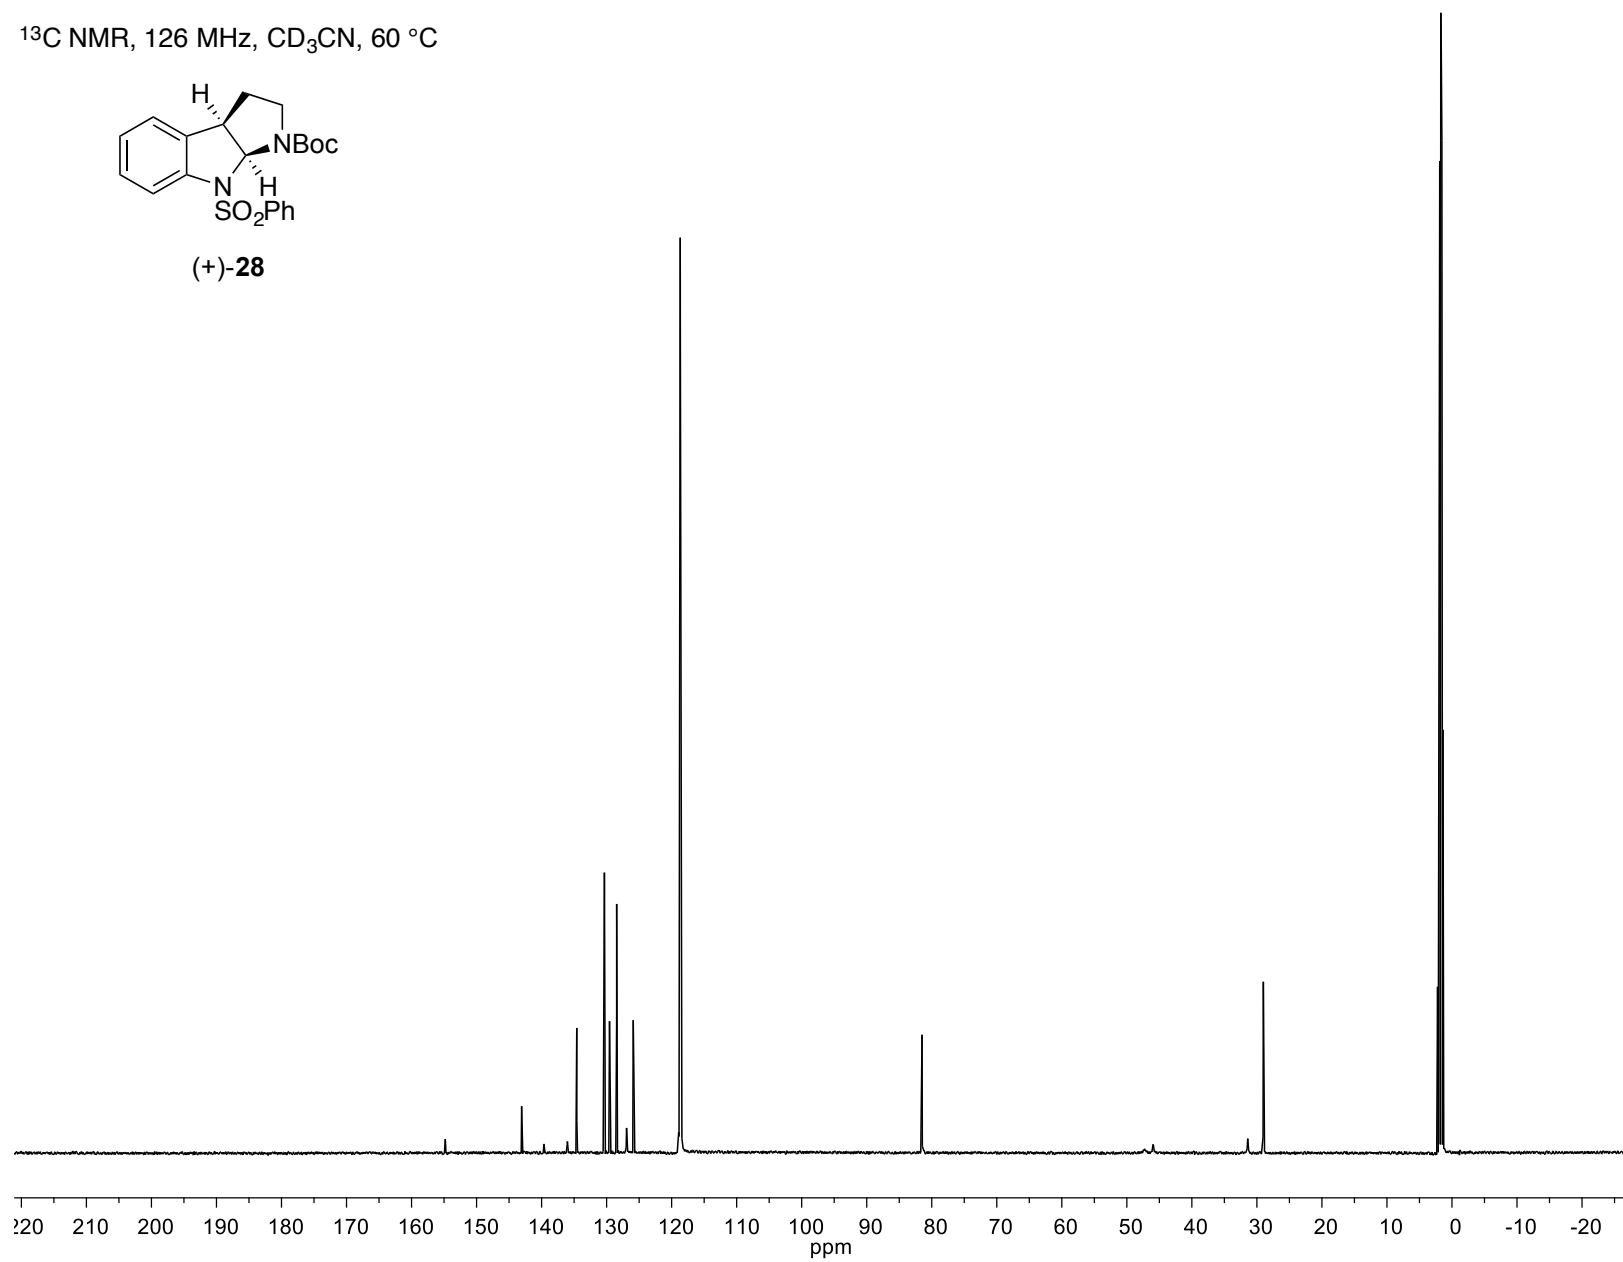

$^1\text{H}$  NMR, 500 MHz,  $\text{CD}_3\text{CN}$ , 60  $^\circ\text{C}$

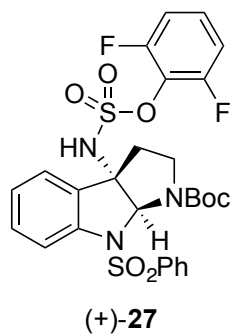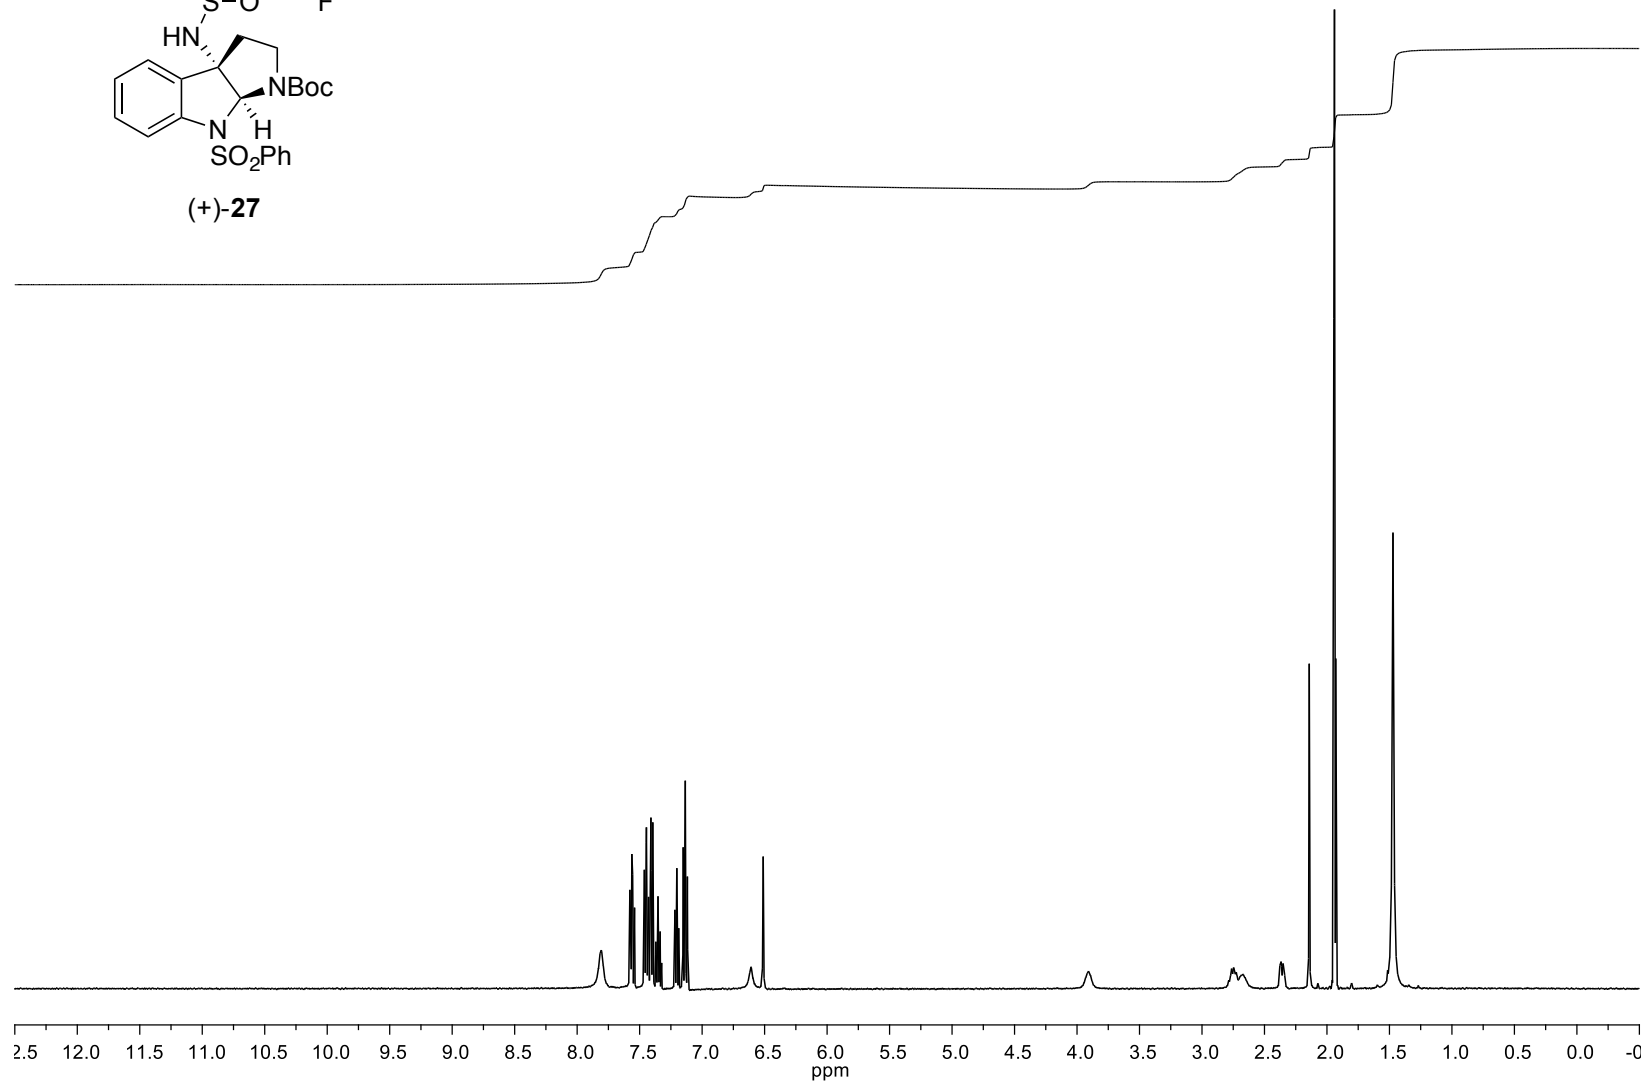

$^{13}\text{C}$  NMR, 126 MHz,  $\text{CD}_3\text{CN}$ , 60  $^\circ\text{C}$

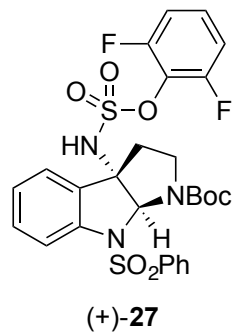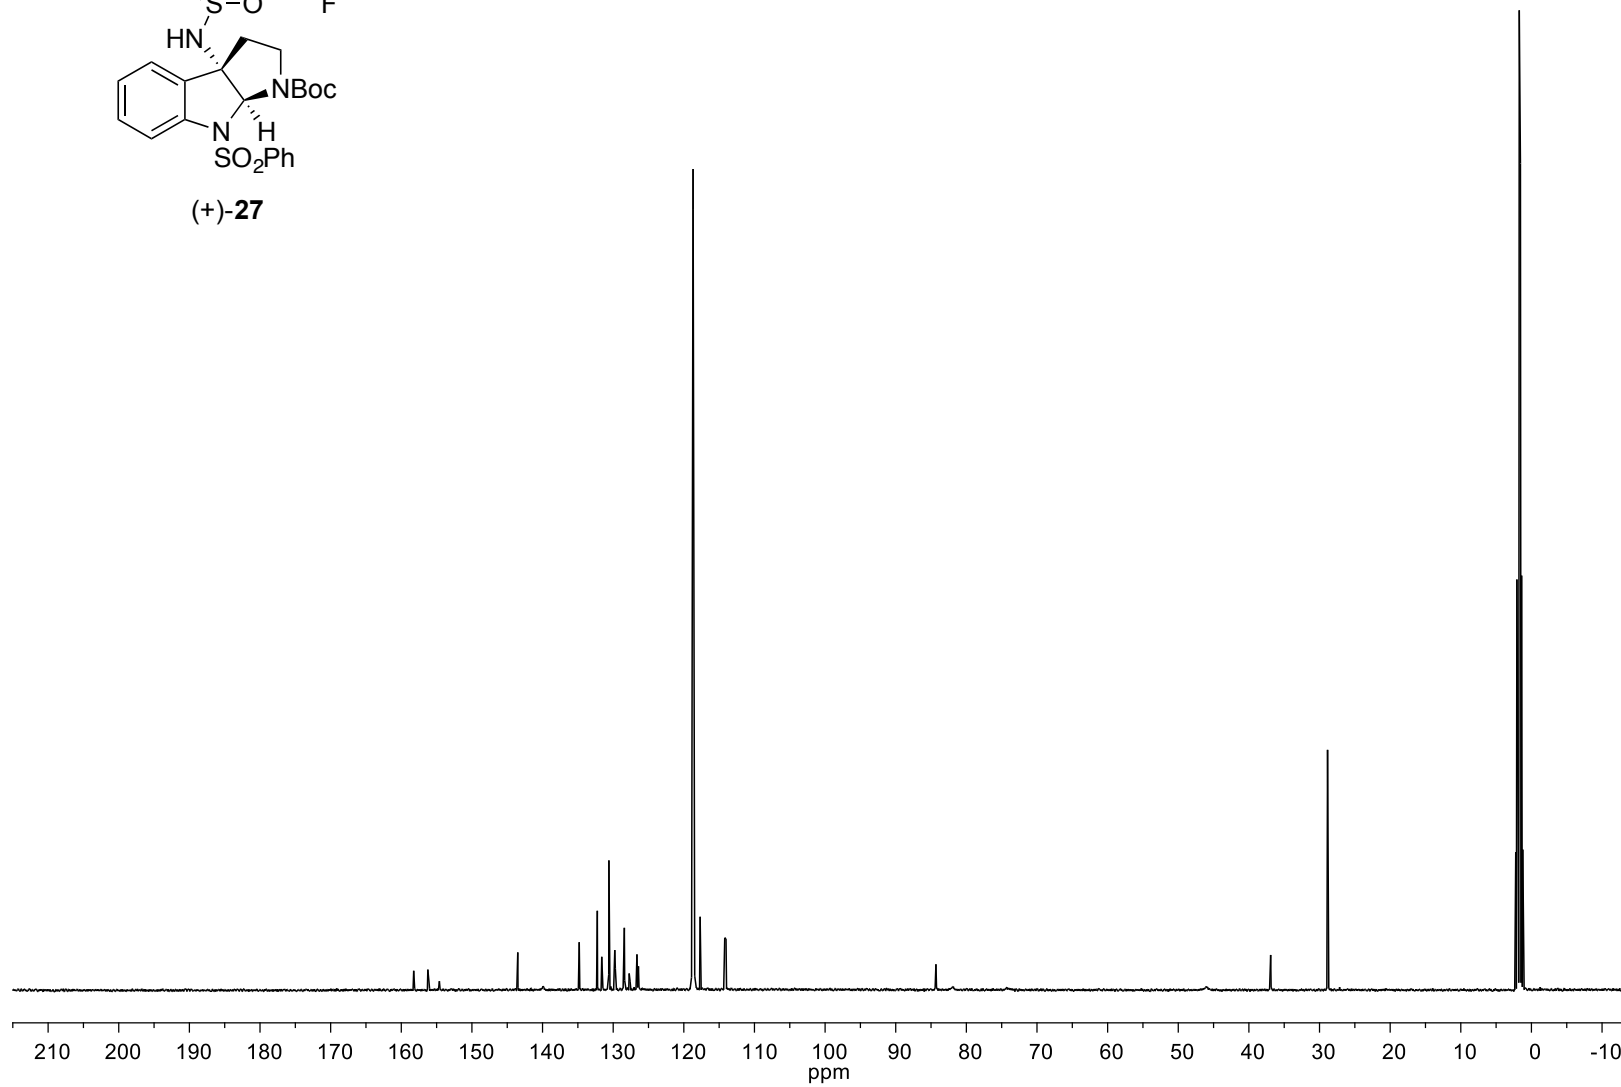

$^{19}\text{F}$  NMR, 282 MHz,  $\text{CD}_3\text{CN}$ , 60 °C

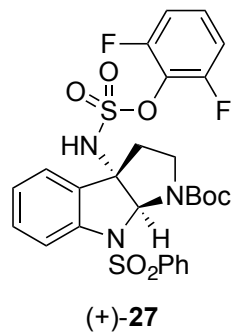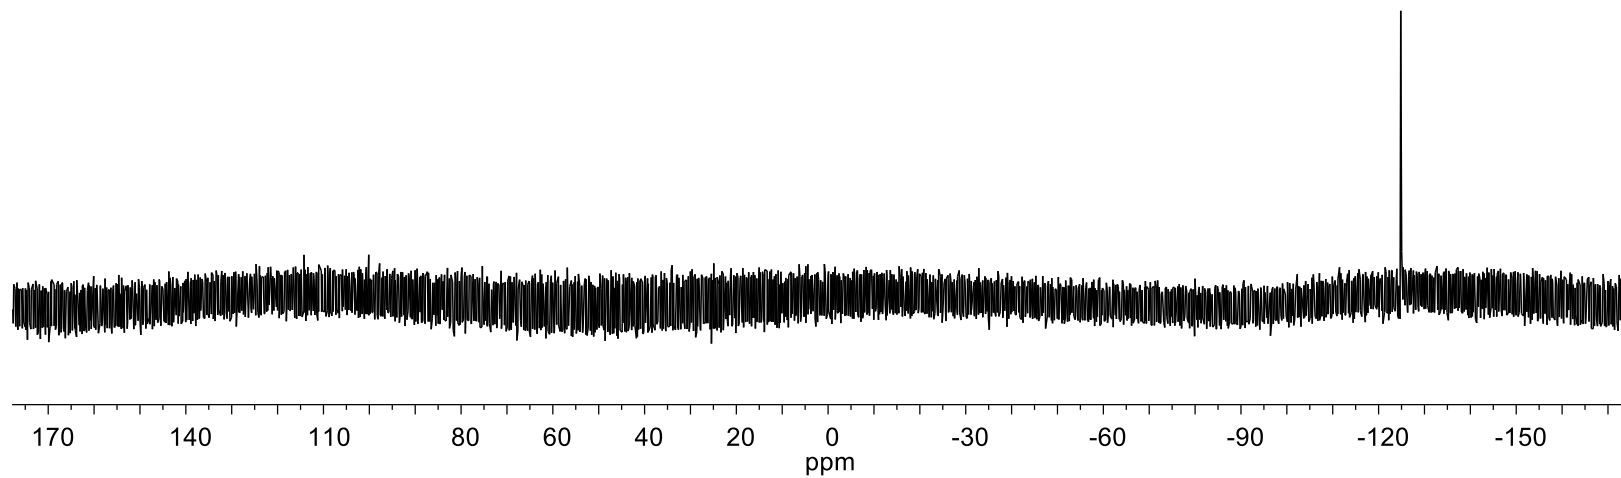

$^1\text{H}$  NMR, 500 MHz,  $\text{CD}_3\text{CN}$ , 20 °C

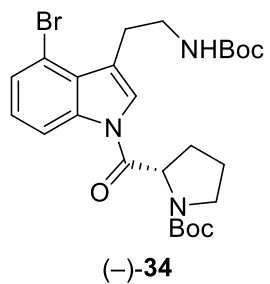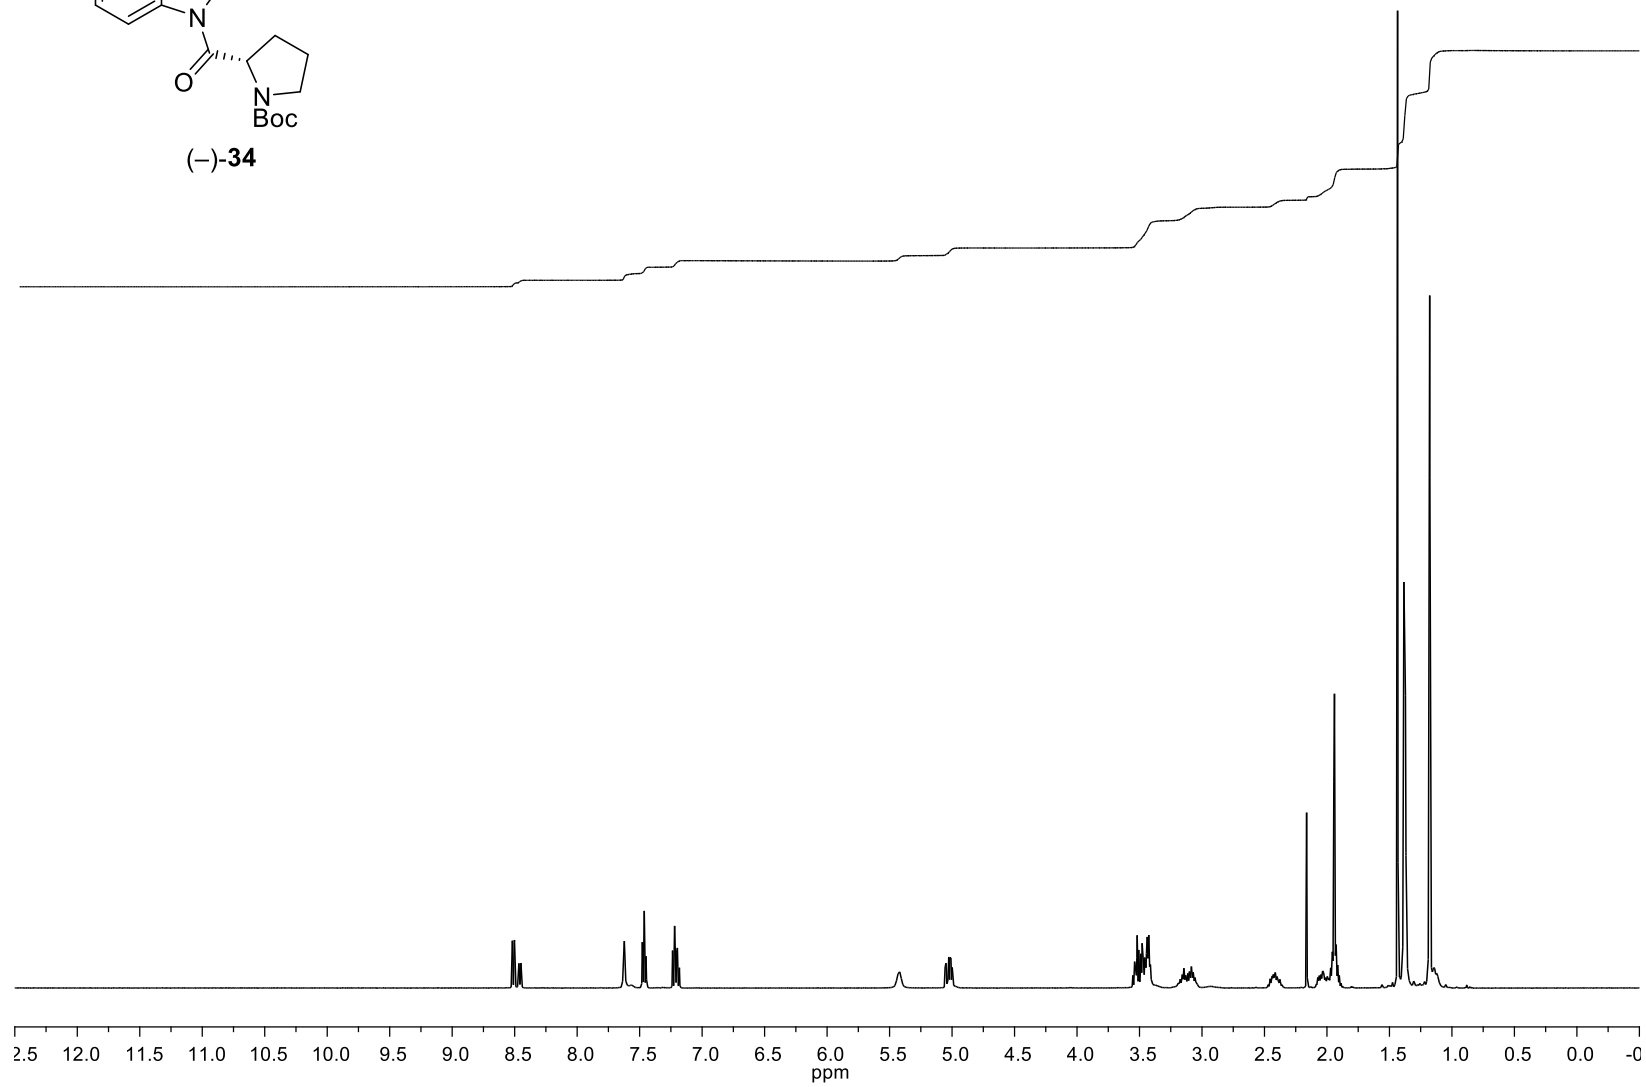

$^{13}\text{C}$  NMR, 126 MHz,  $\text{CD}_3\text{CN}$ , 20 °C

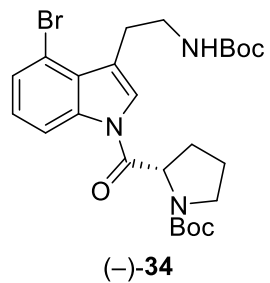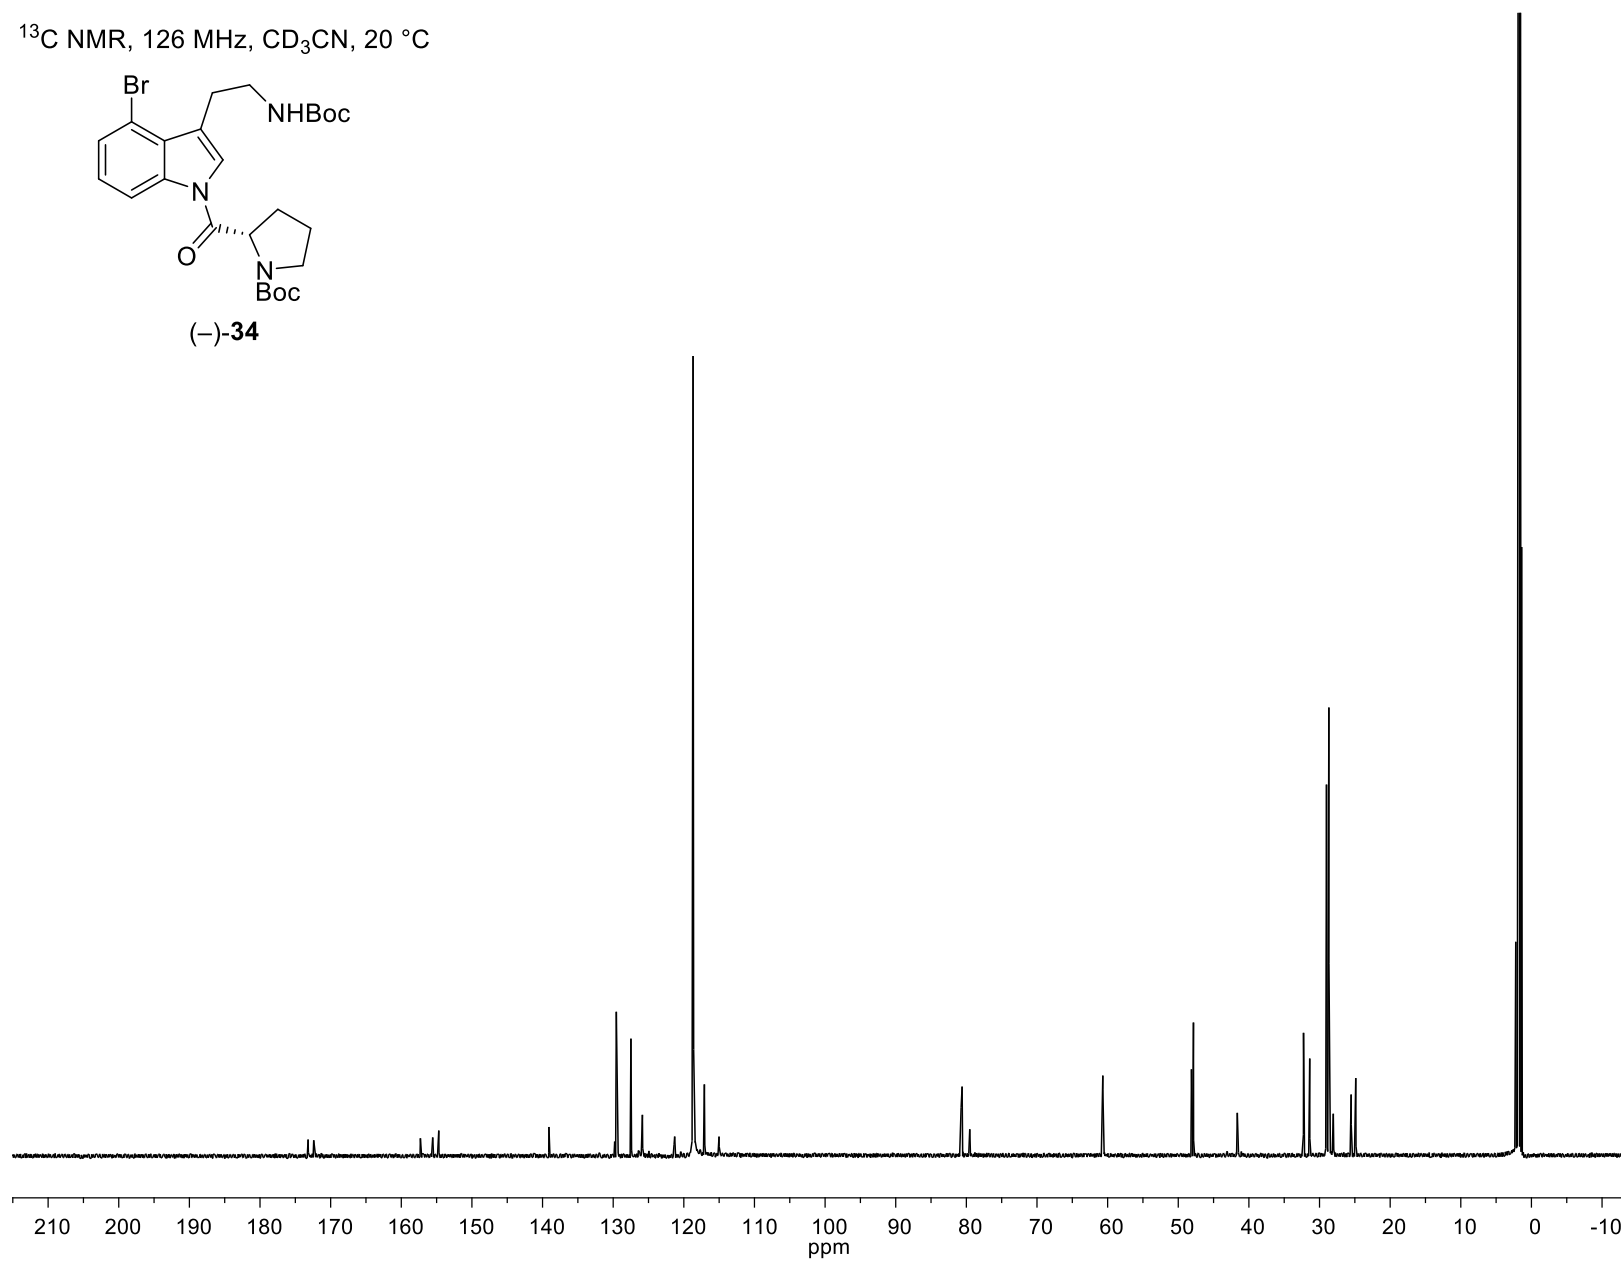

$^1\text{H}$  NMR, 500 MHz,  $\text{CD}_3\text{CN}$ , 20  $^\circ\text{C}$

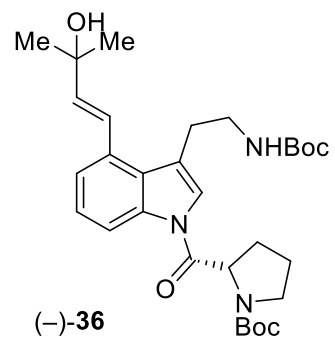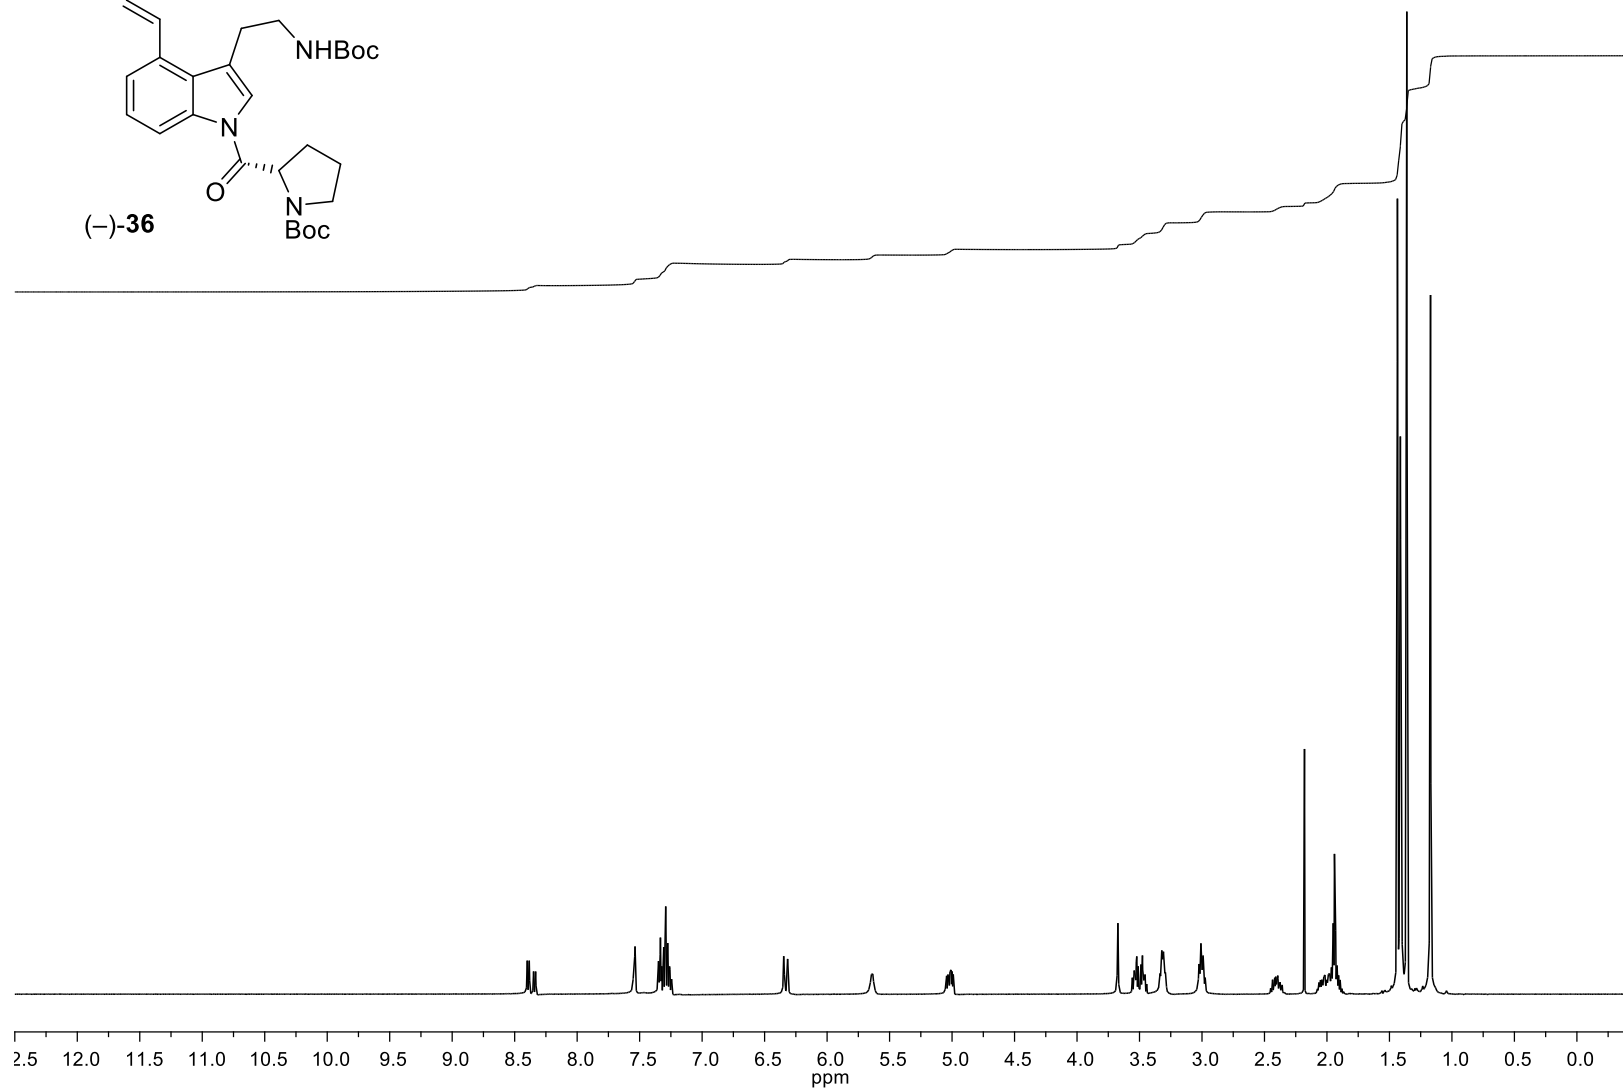



$^{13}\text{C}$  NMR, 126 MHz,  $\text{CD}_3\text{CN}$ , 20 °C

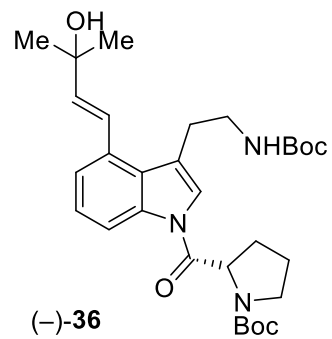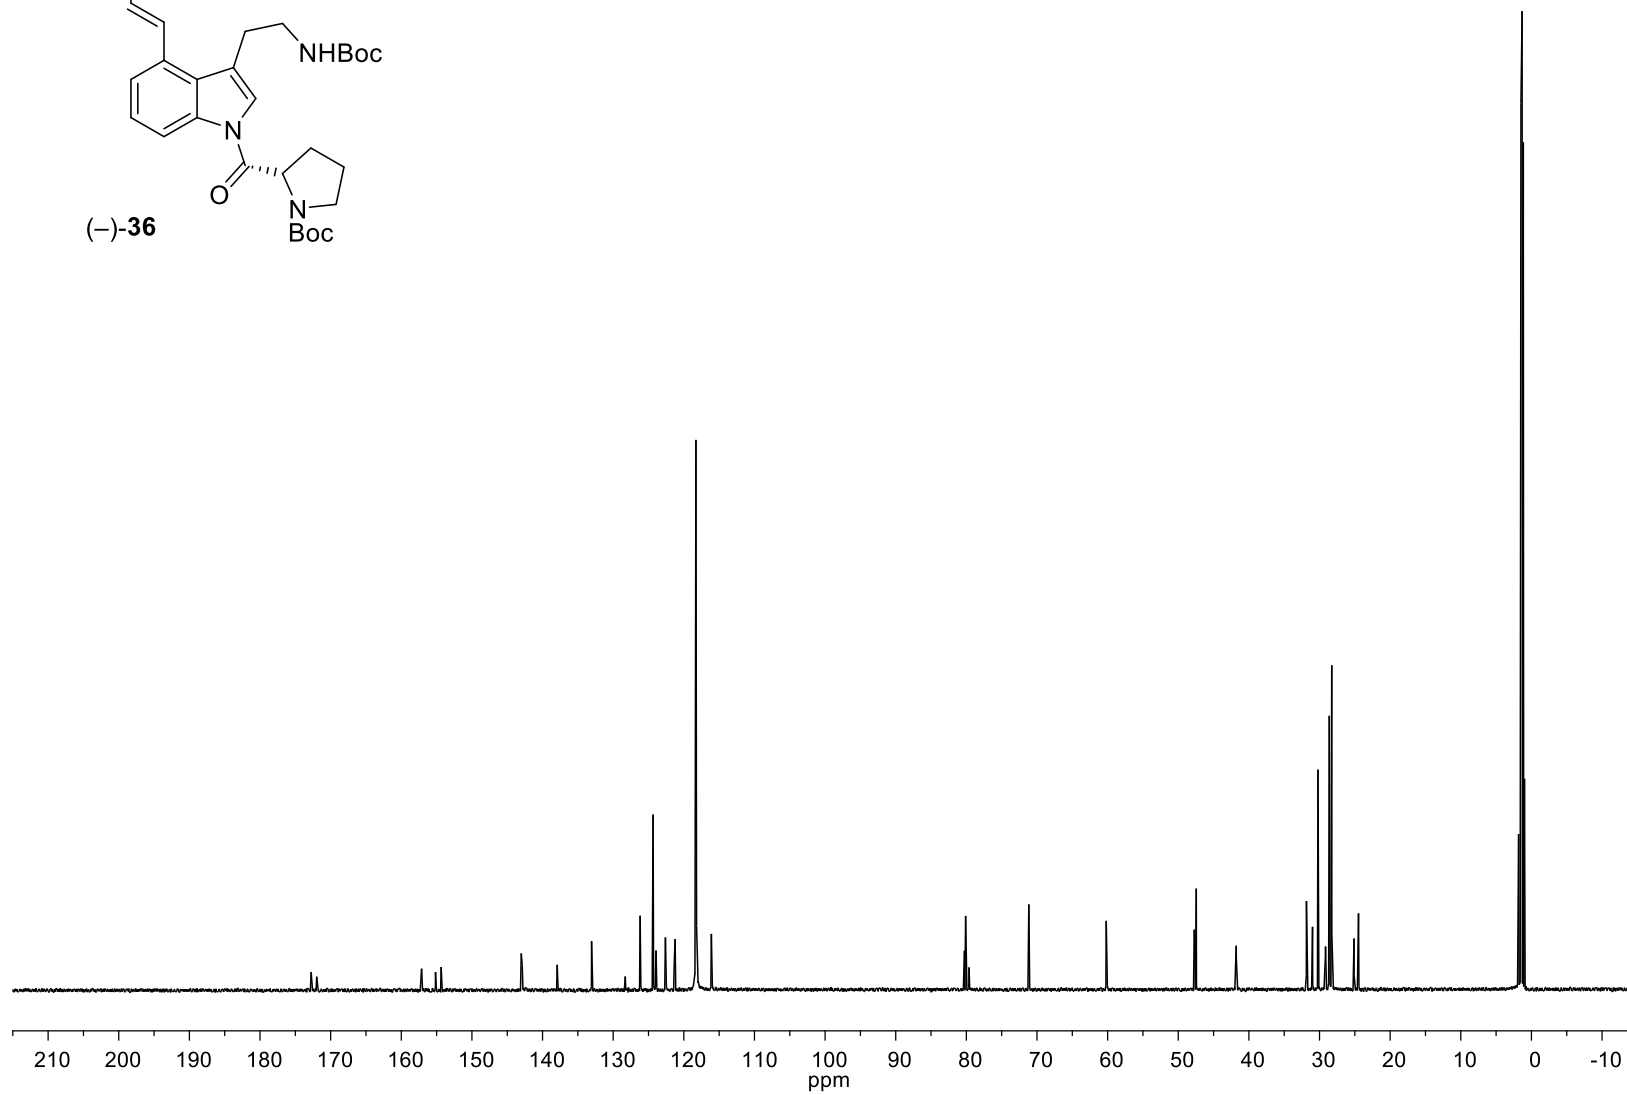

$^1\text{H}$  NMR, 500 MHz,  $\text{CD}_3\text{CN}$ , 20  $^\circ\text{C}$

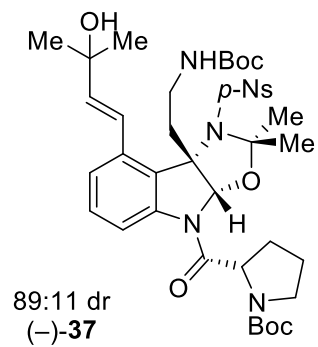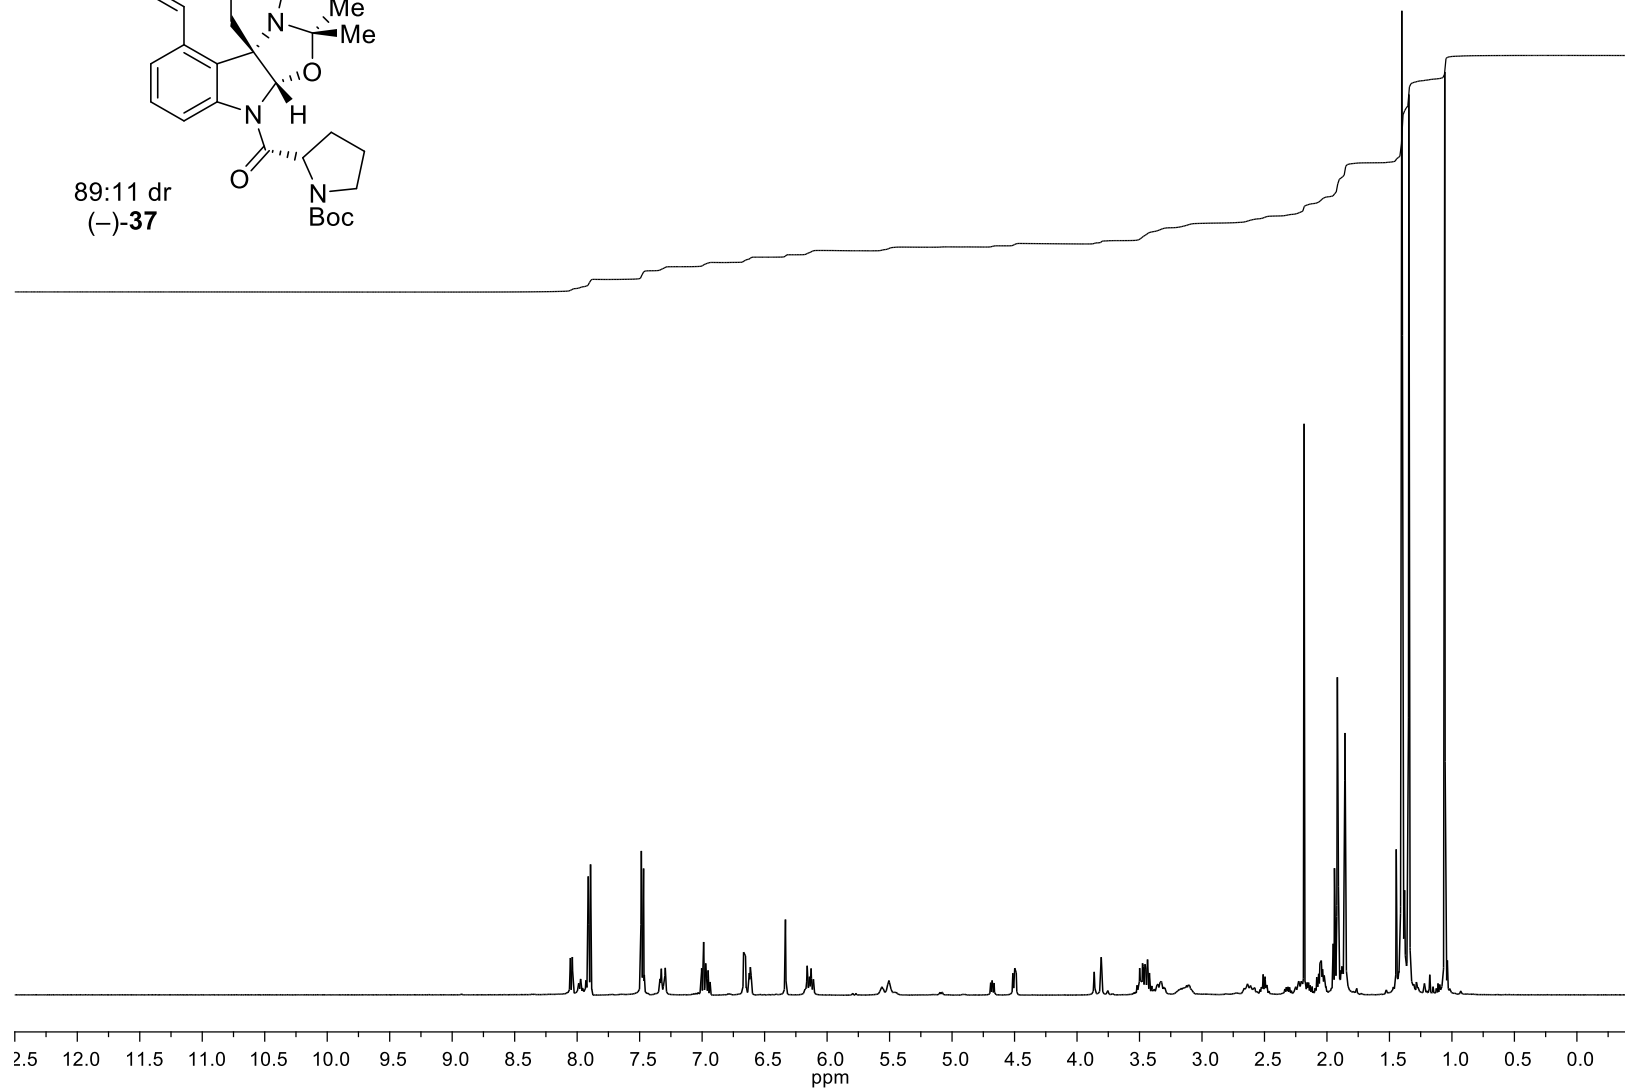

$^{13}\text{C}$  NMR, 126 MHz,  $\text{CD}_3\text{CN}$ , 20 °C

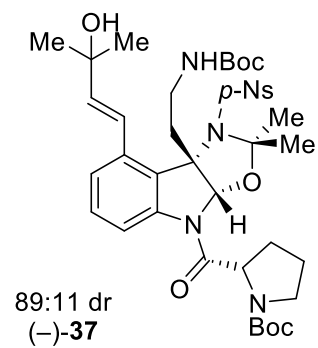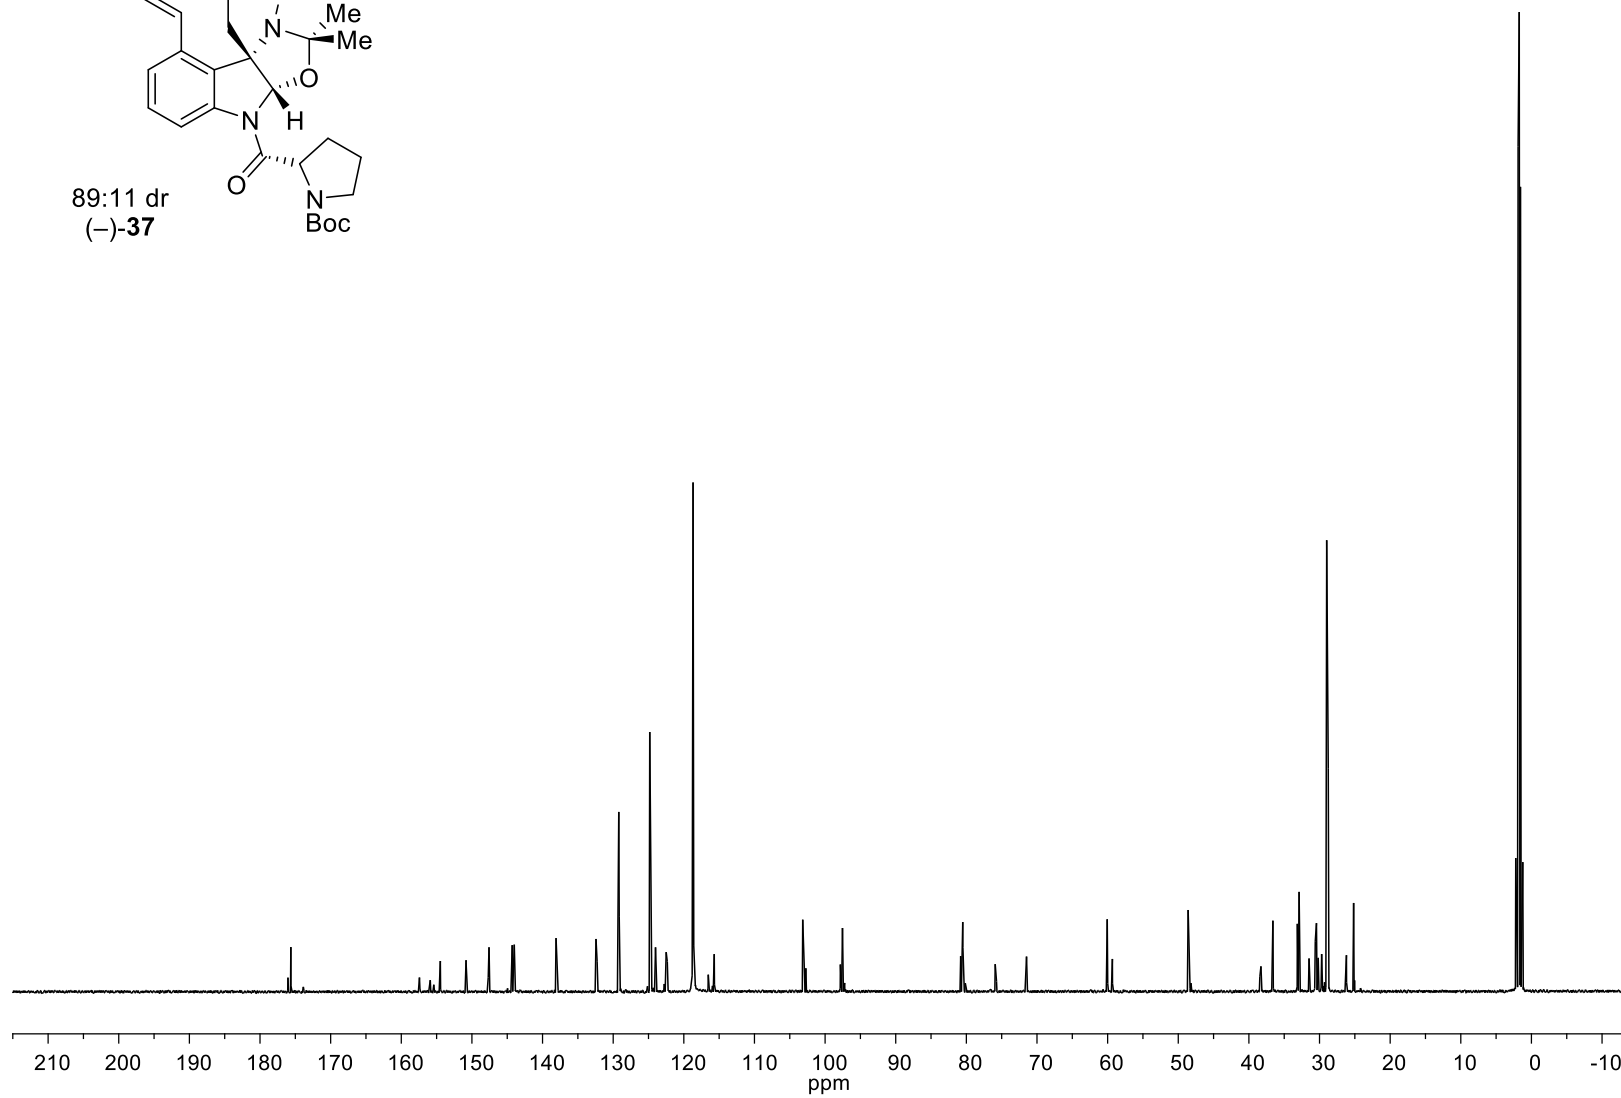

$^1\text{H}$  NMR, 500 MHz,  $\text{CD}_3\text{CN}$ , 20 °C

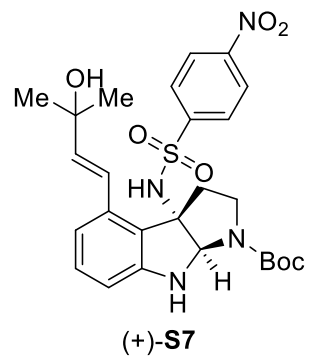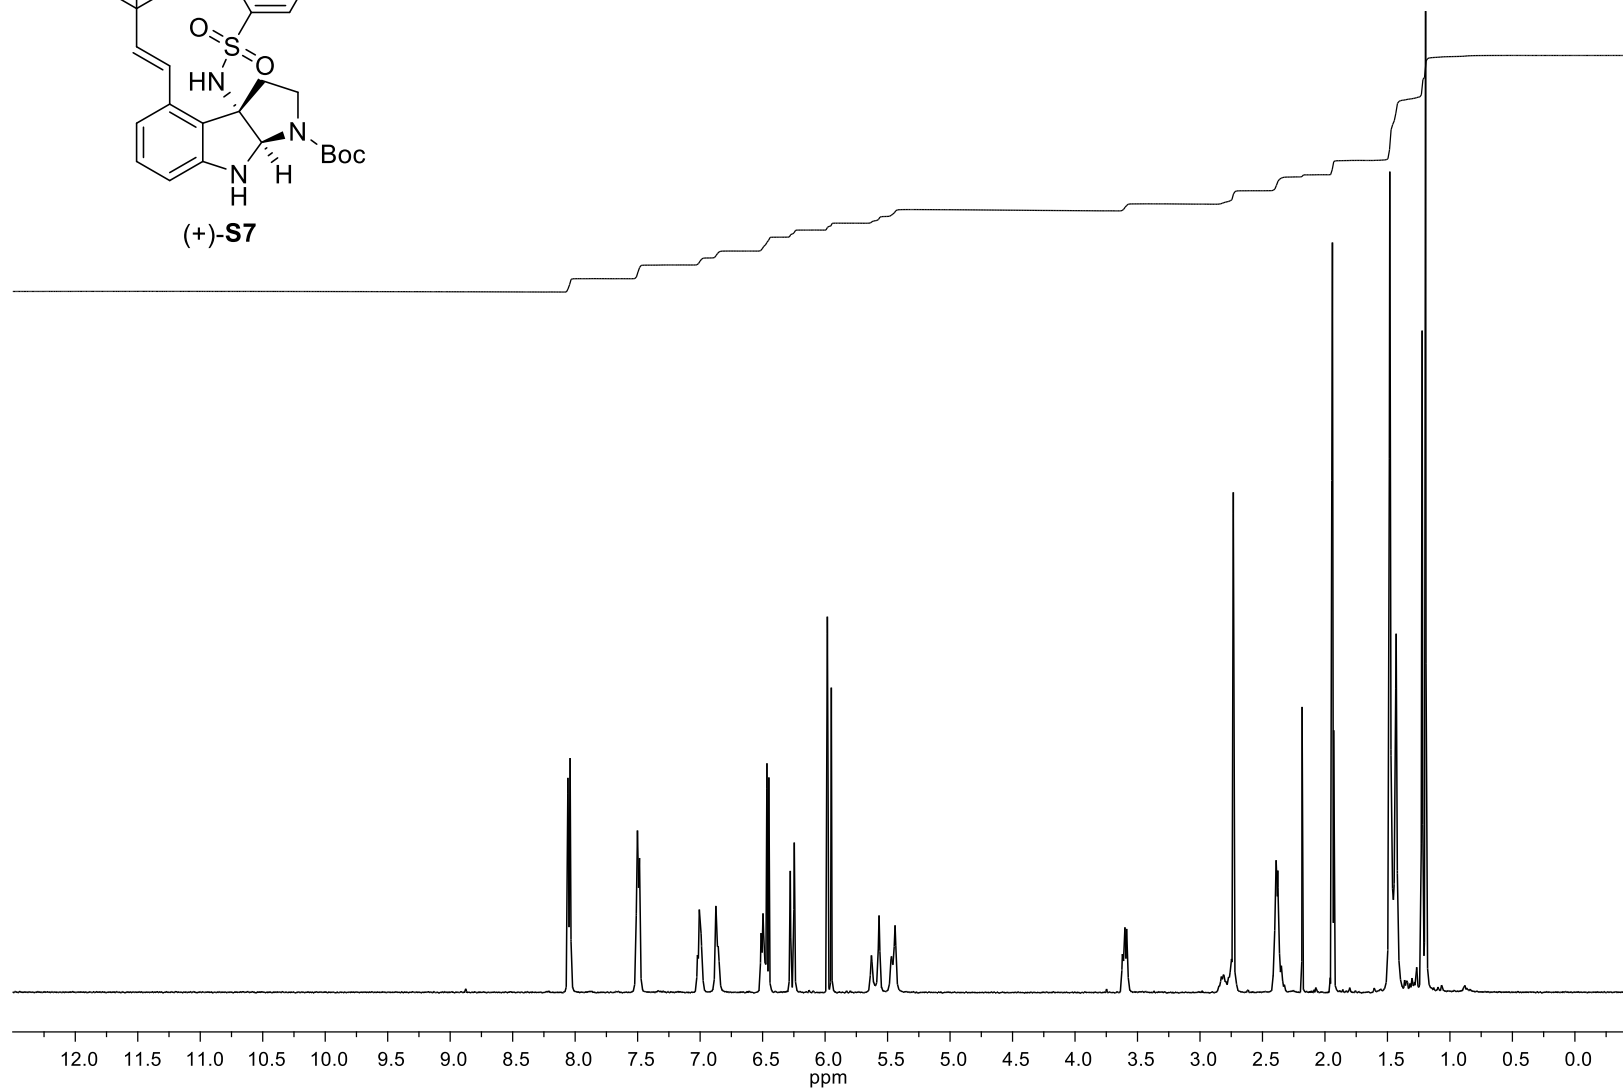

$^{13}\text{C}$  NMR, 126 MHz,  $\text{CD}_3\text{CN}$ , 20 °C

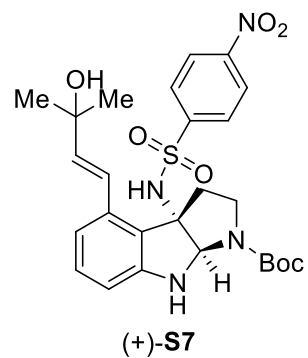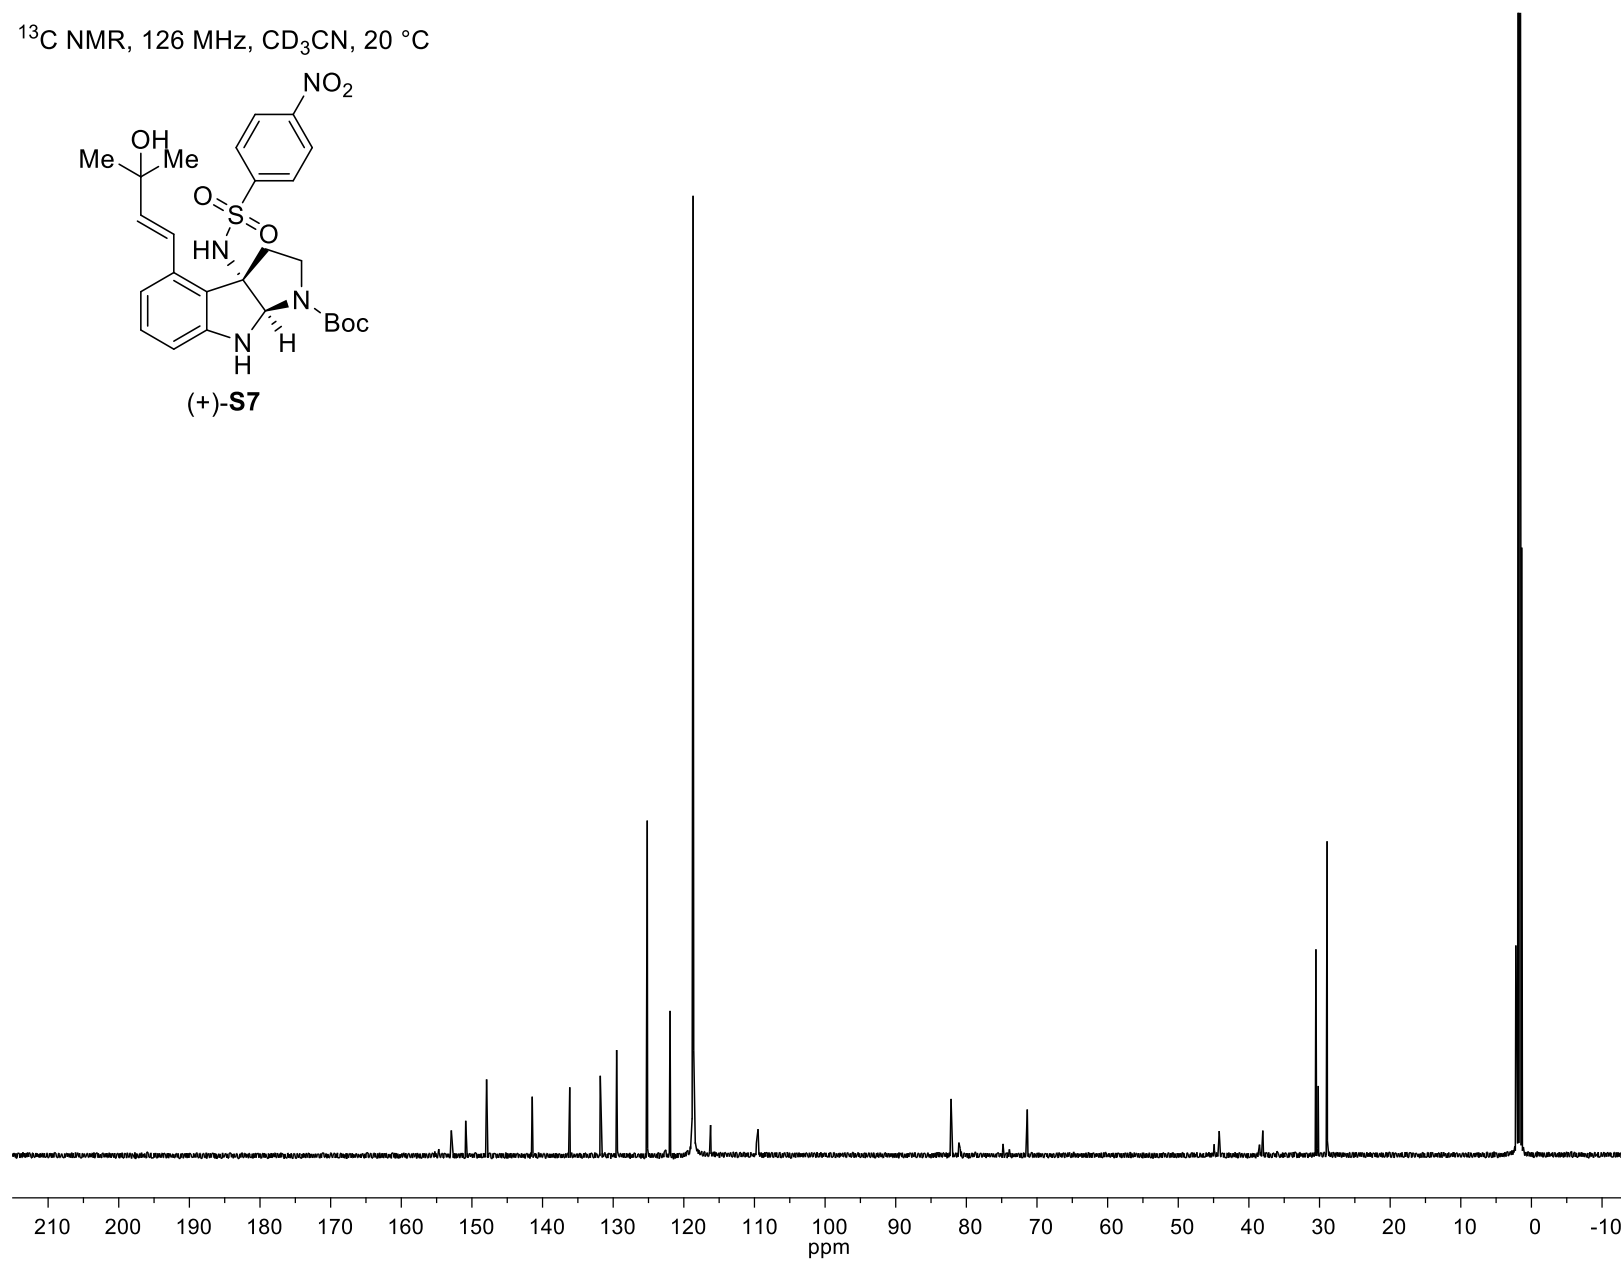

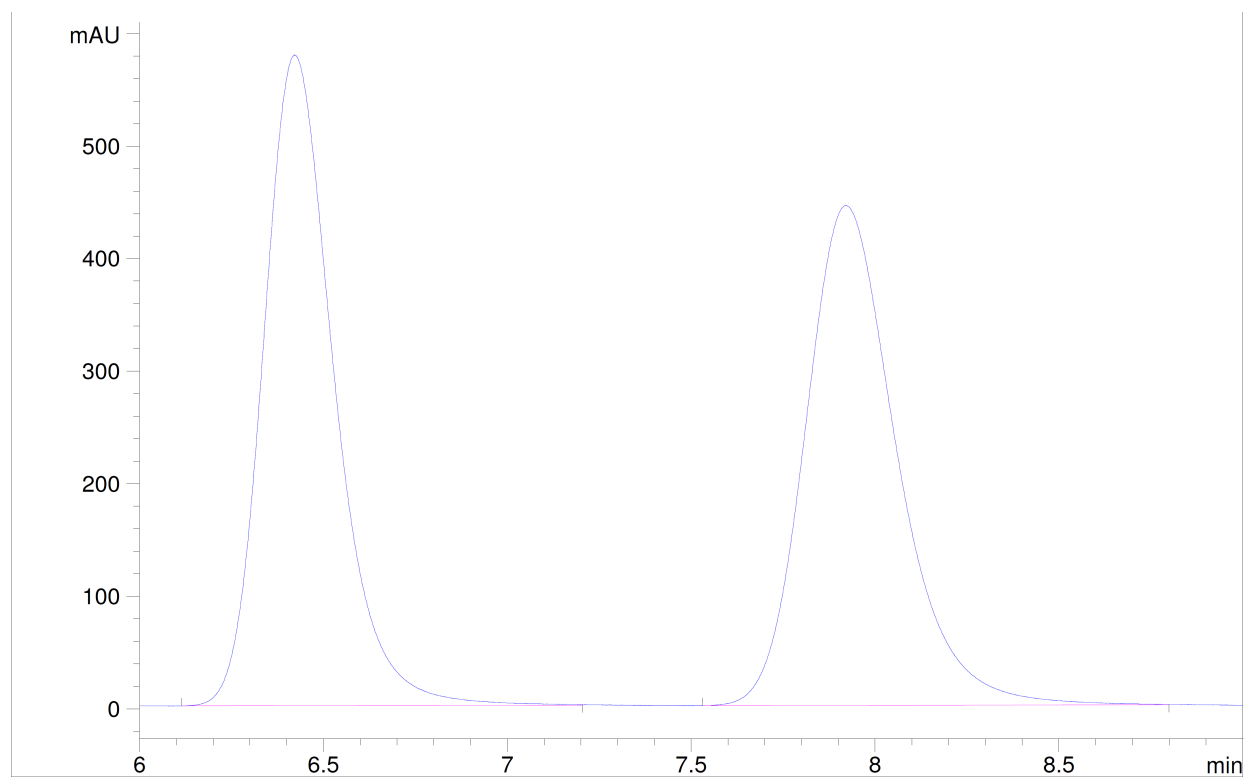

| # | Meas. Ret. Time | Area % |
|---|-----------------|--------|
| 1 | 6.423           | 50.192 |
| 2 | 7.921           | 49.808 |

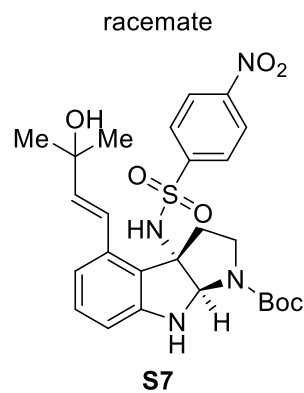

Chiralpak IA  
80% *i*-PrOH / 20% hexanes  
1.0 mL / min  
254 nm

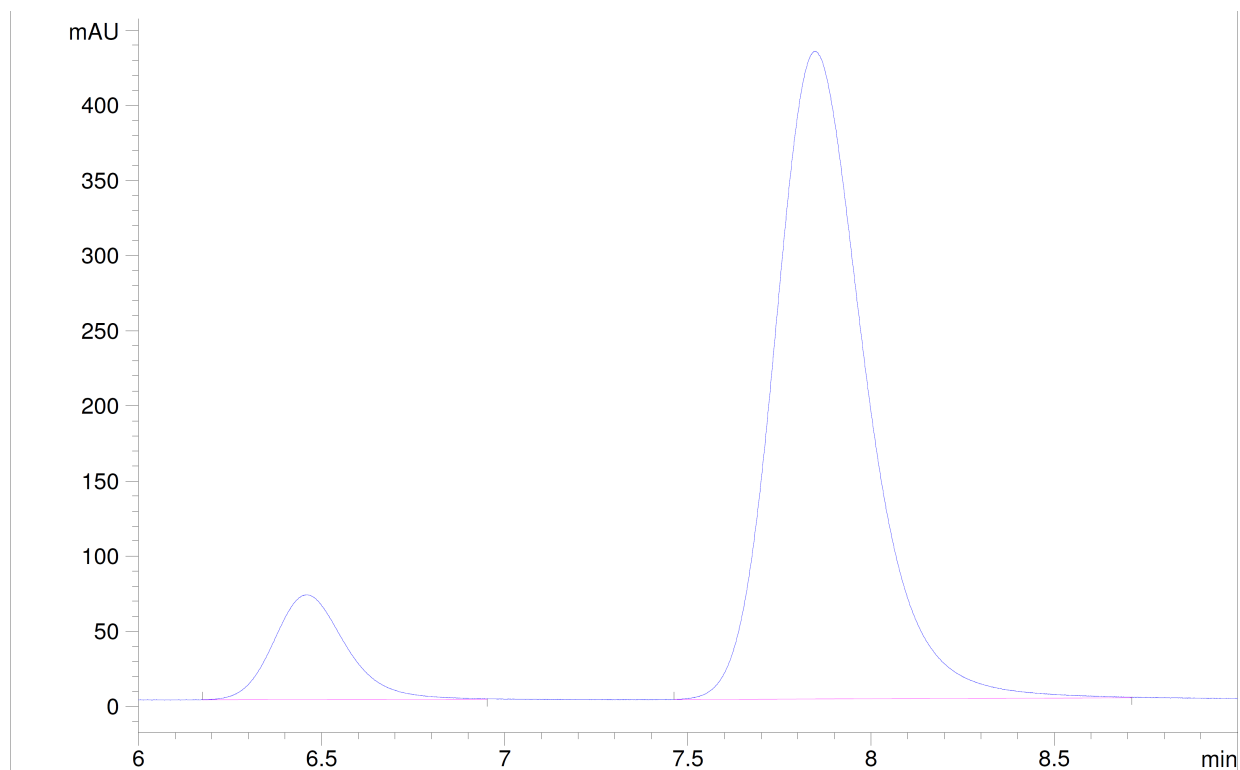

| # | Meas. Ret. Time | Area % |
|---|-----------------|--------|
| 1 | 6.460           | 11.441 |
| 2 | 7.847           | 88.559 |

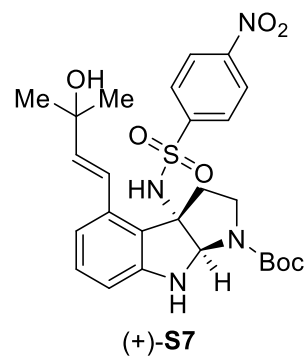

Chiralpak IA  
80% *i*-PrOH / 20% hexanes  
1.0 mL / min  
254 nm

$^1\text{H}$  NMR, 500 MHz,  $\text{CDCl}_3$ , 20 °C

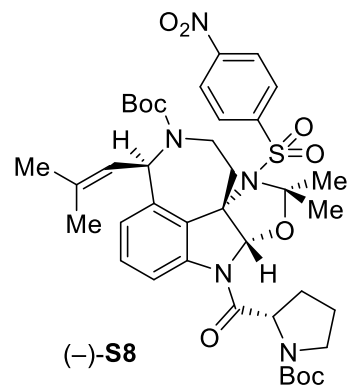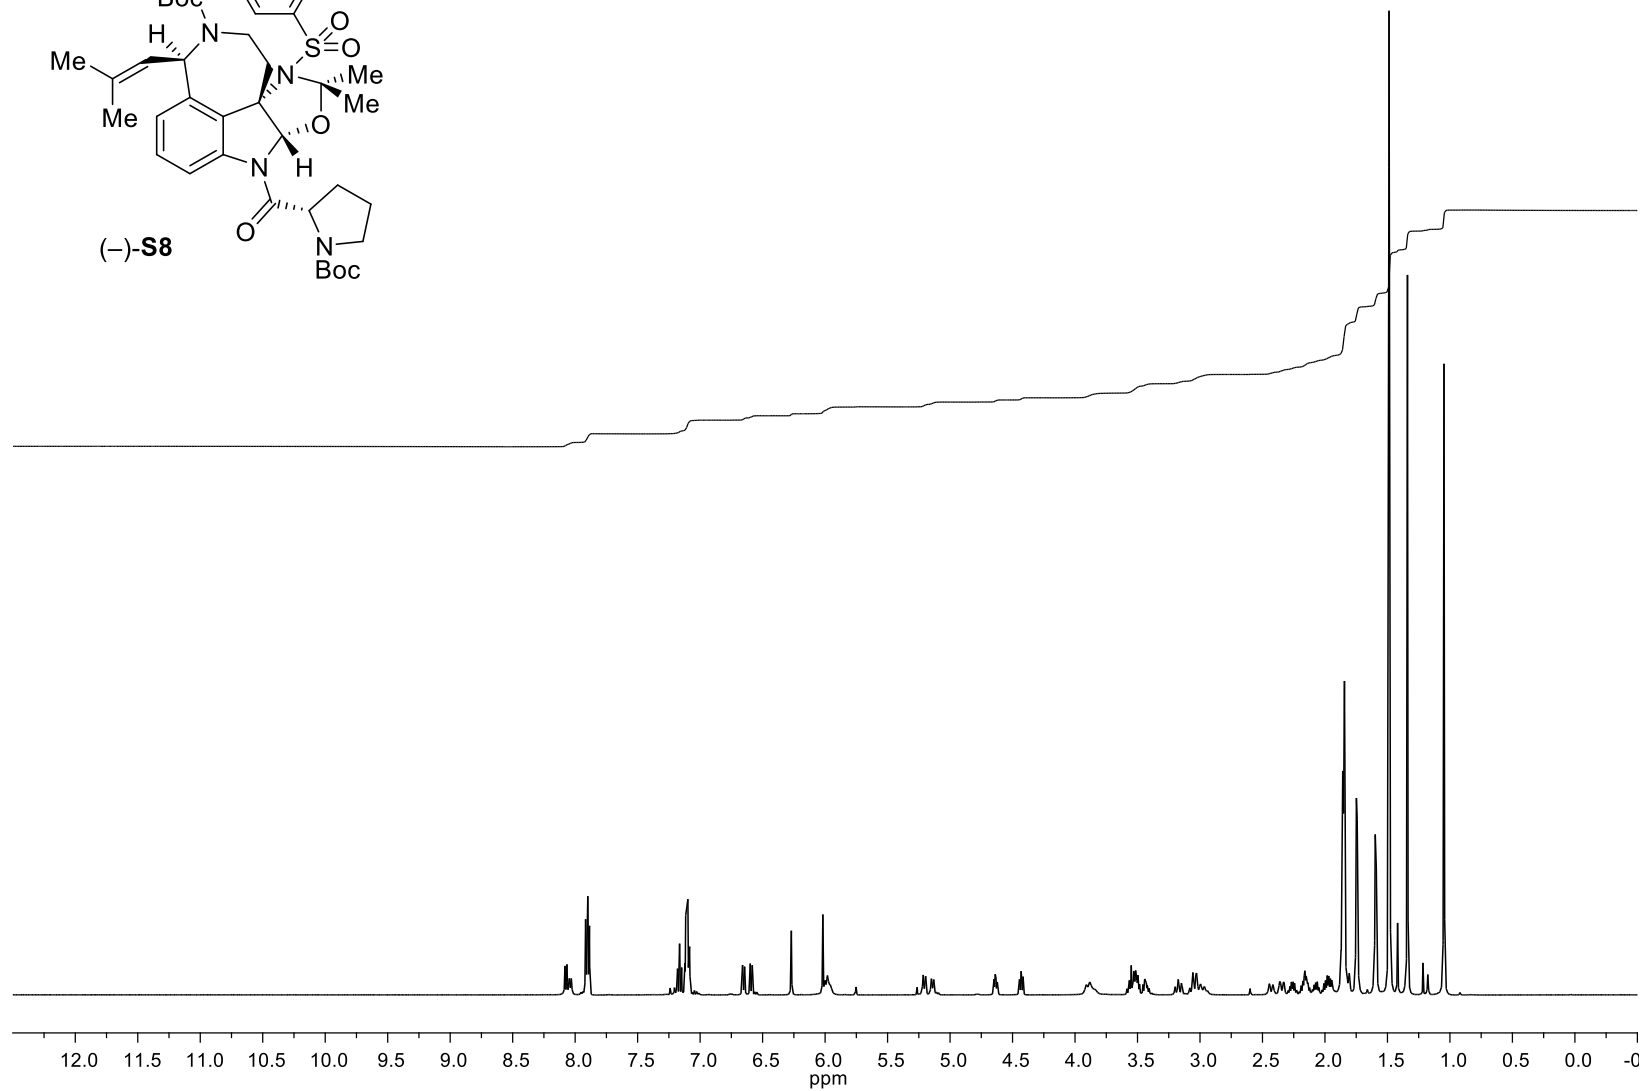



$^{13}\text{C}$  NMR, 126 MHz,  $\text{CDCl}_3$ , 20 °C

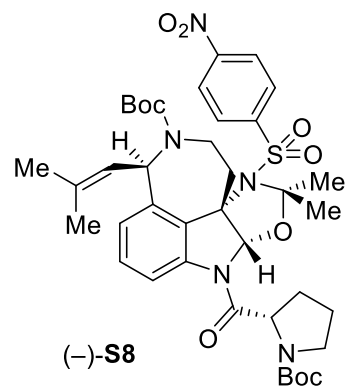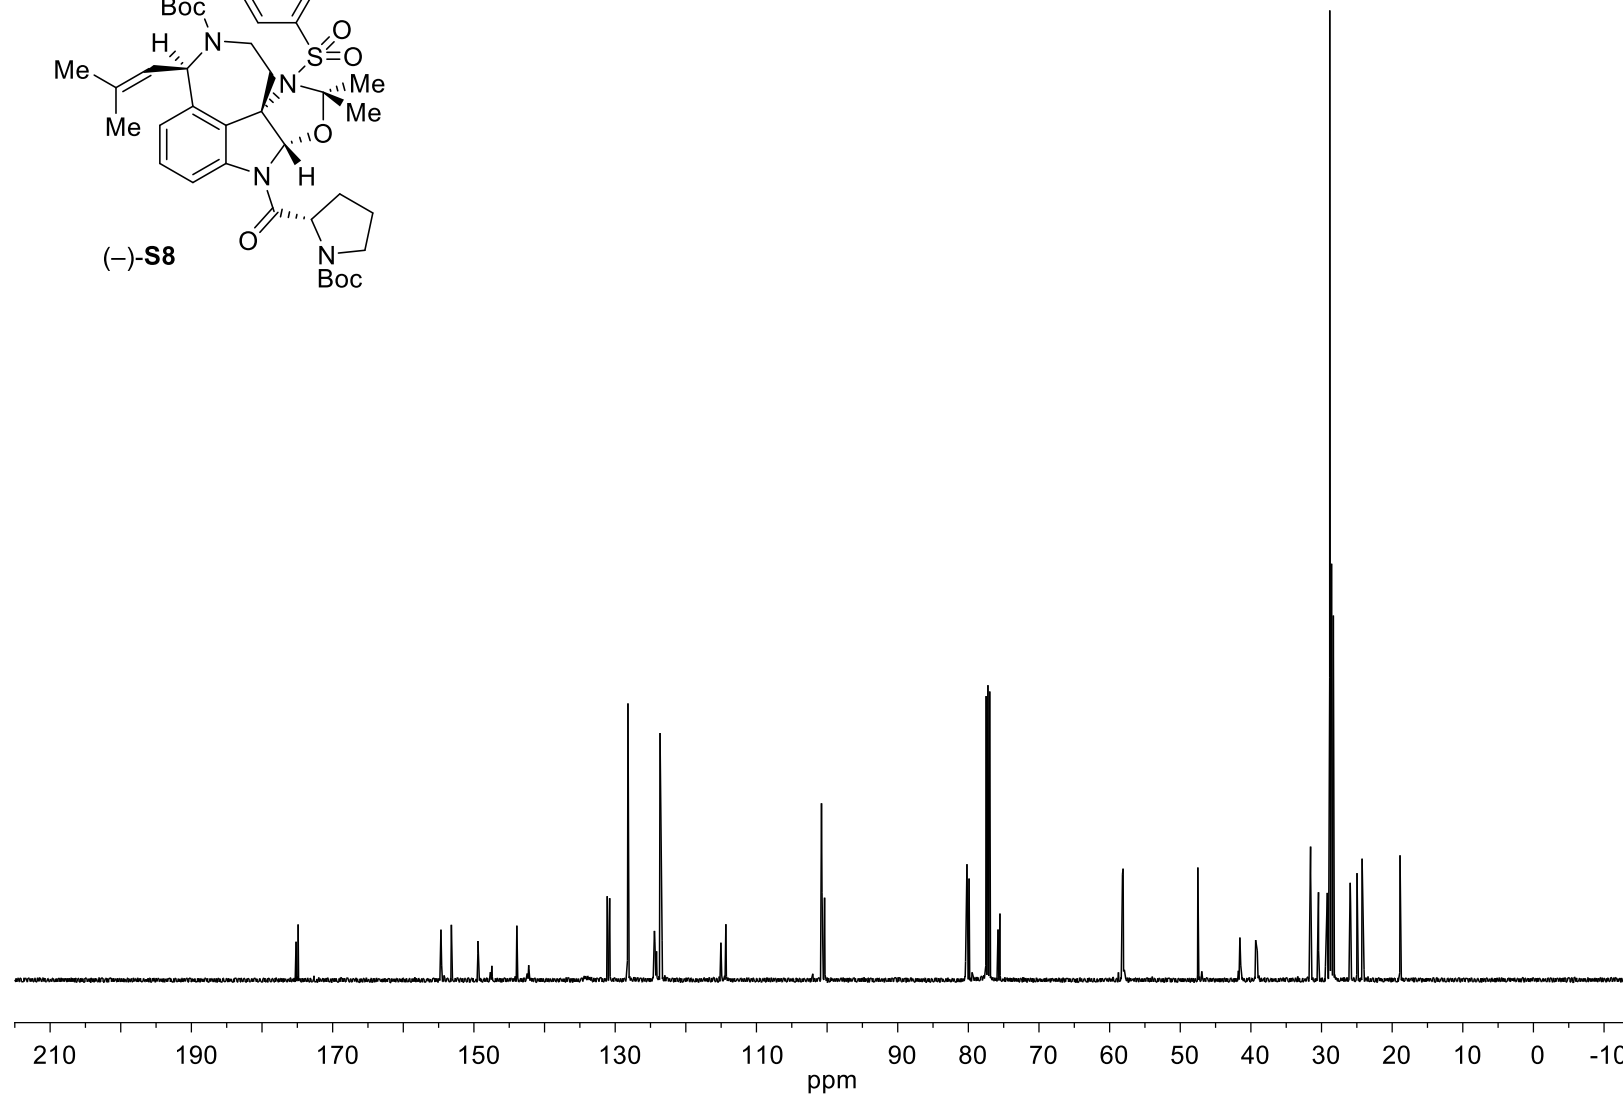

$^1\text{H}$  NMR, 500 MHz,  $\text{CDCl}_3$ , 20  $^\circ\text{C}$

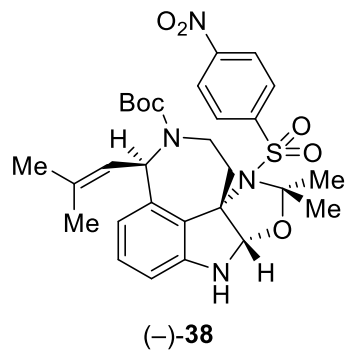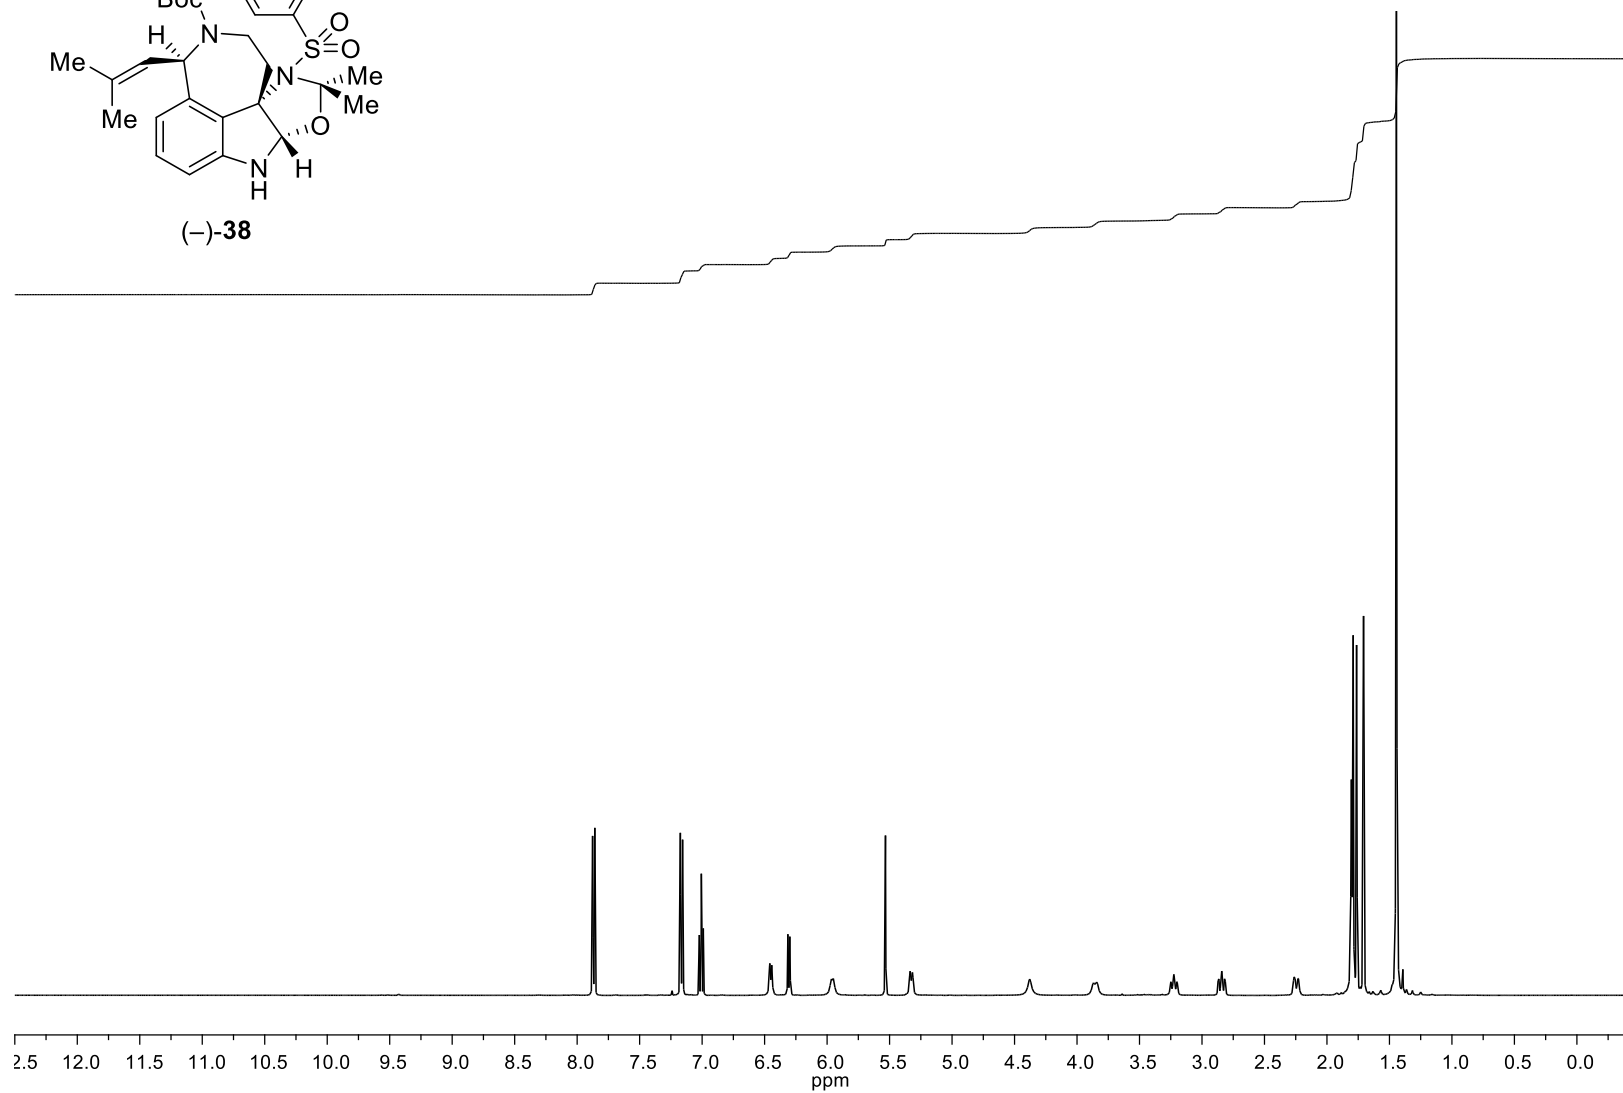

$^{13}\text{C}$  NMR, 126 MHz,  $\text{CDCl}_3$ , 20 °C

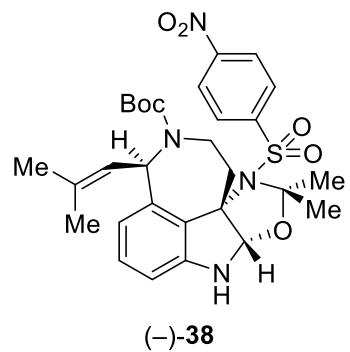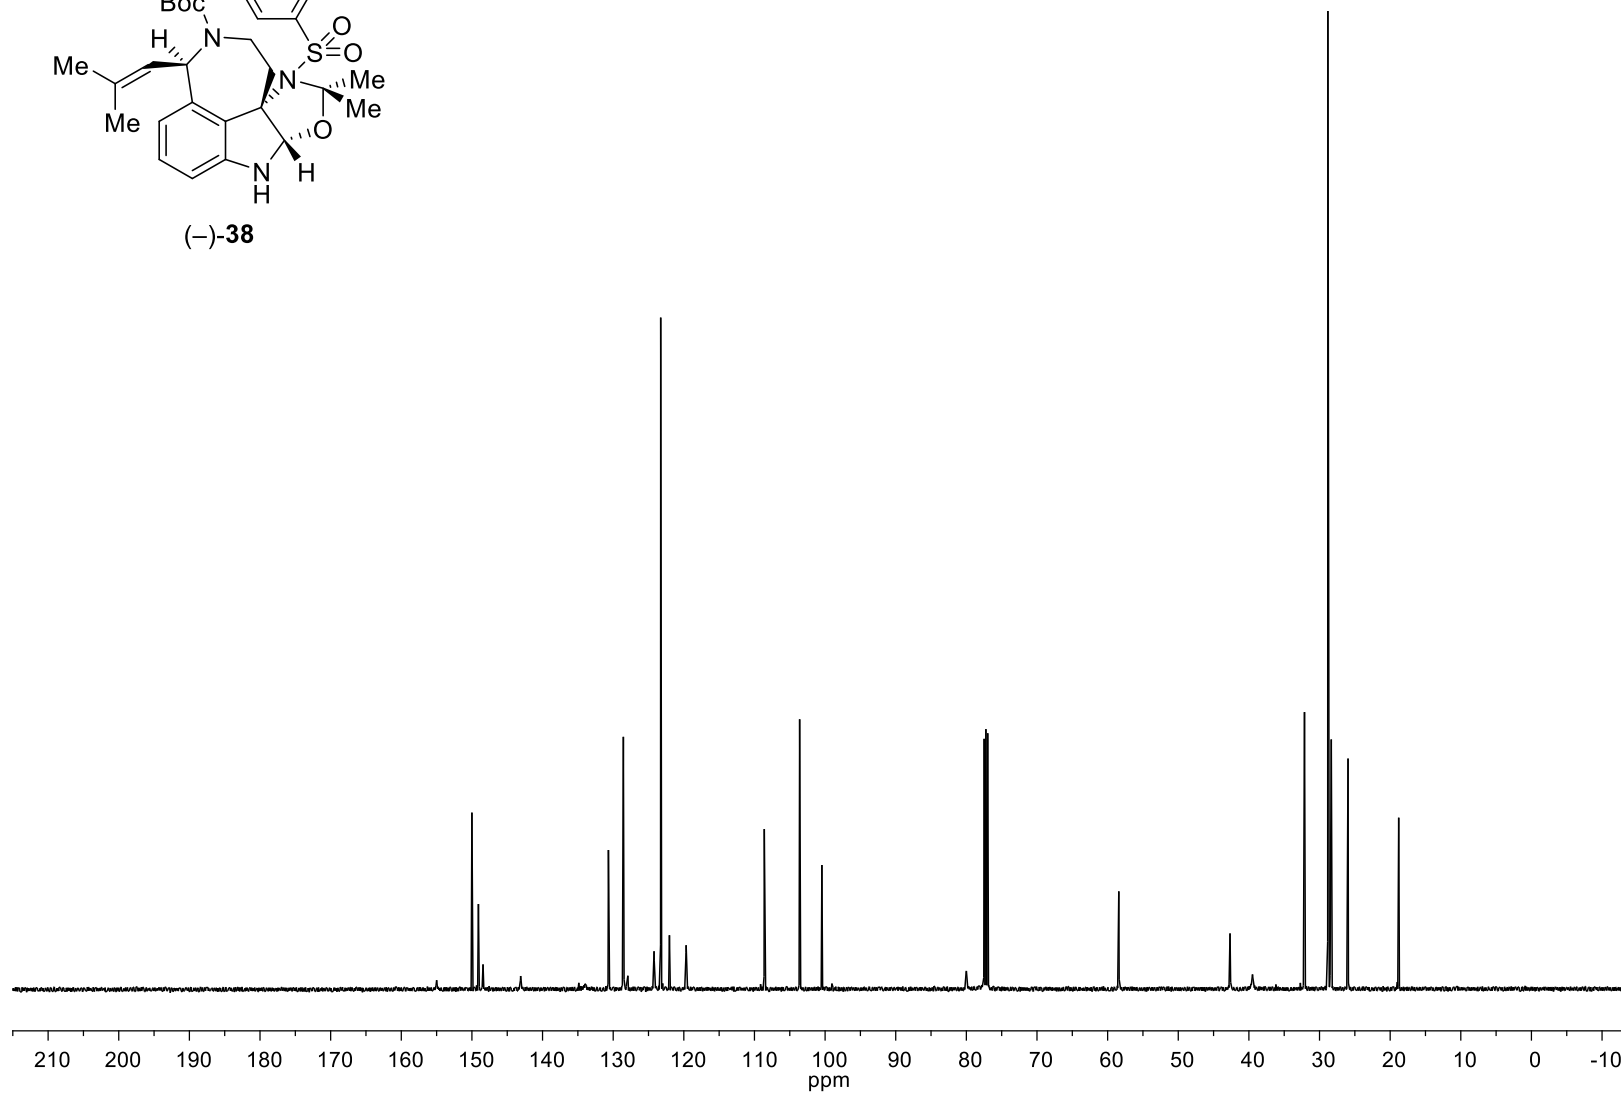

$^1\text{H}$  NMR, 500 MHz,  $\text{CDCl}_3$ , 20 °C

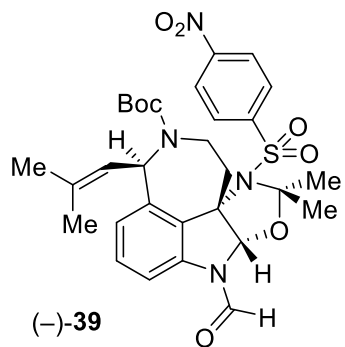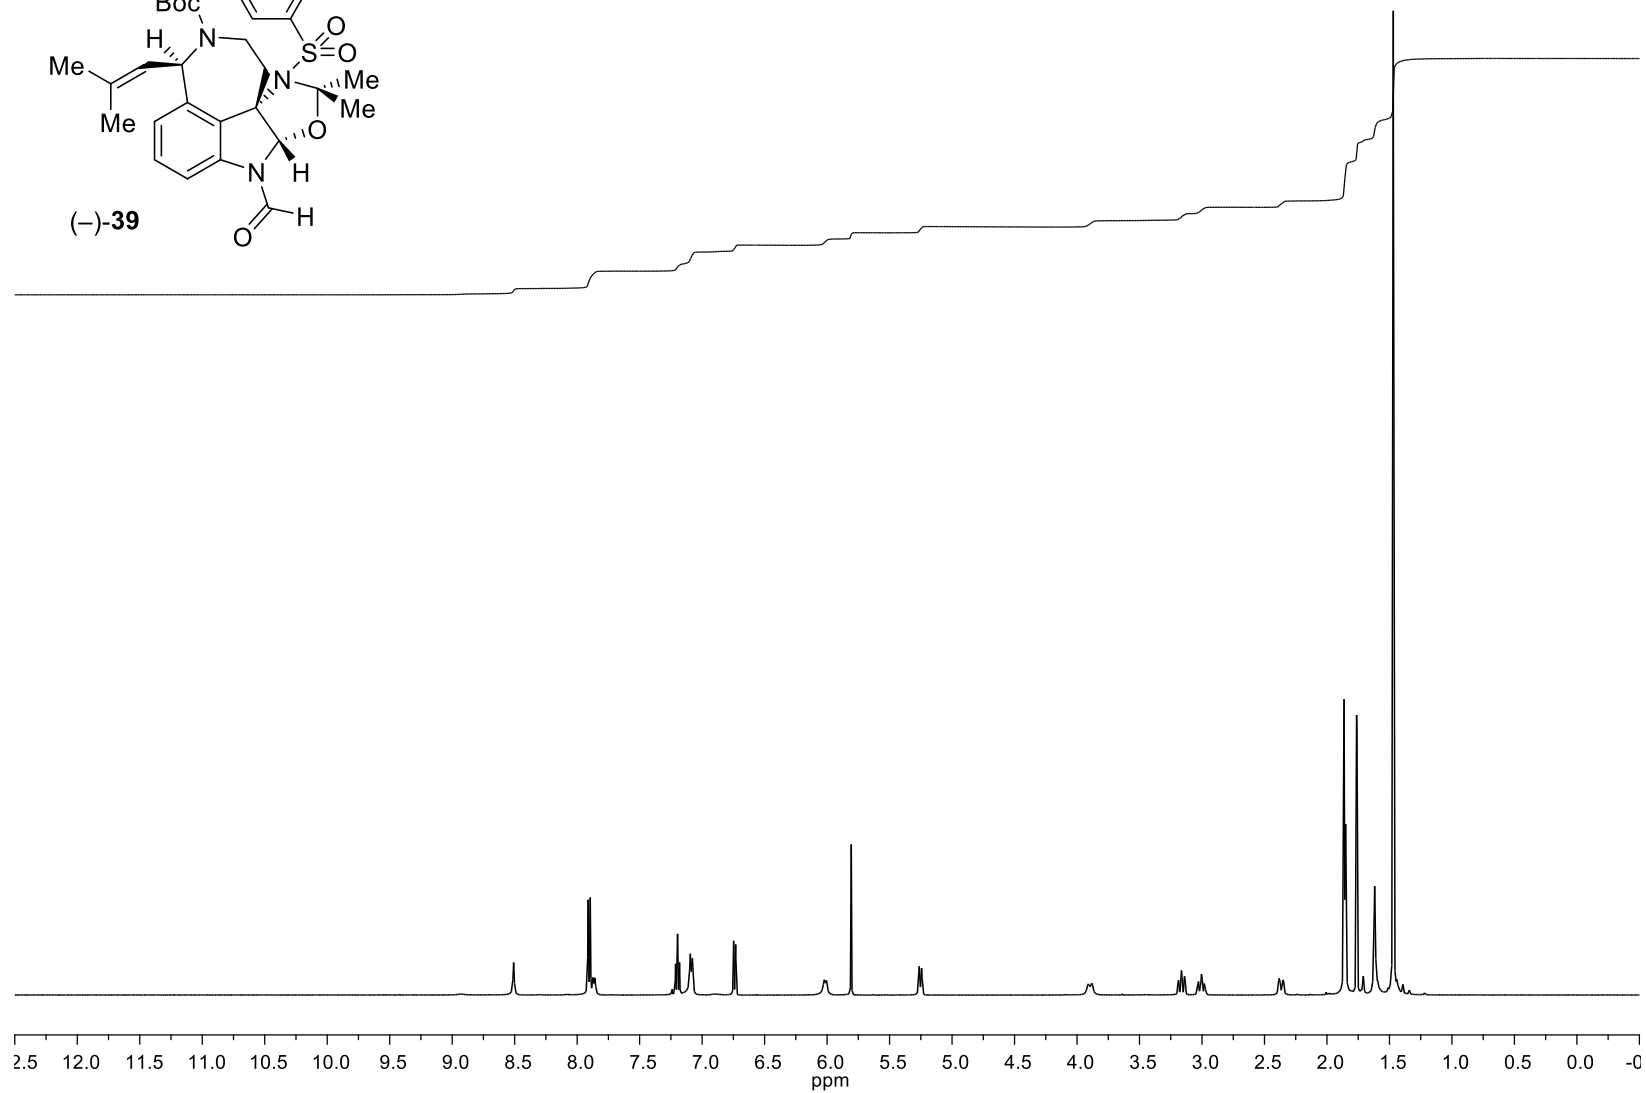

$^{13}\text{C}$  NMR, 126 MHz,  $\text{CDCl}_3$ , 20 °C

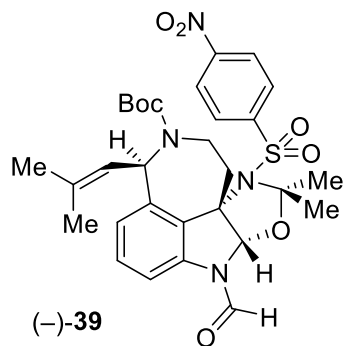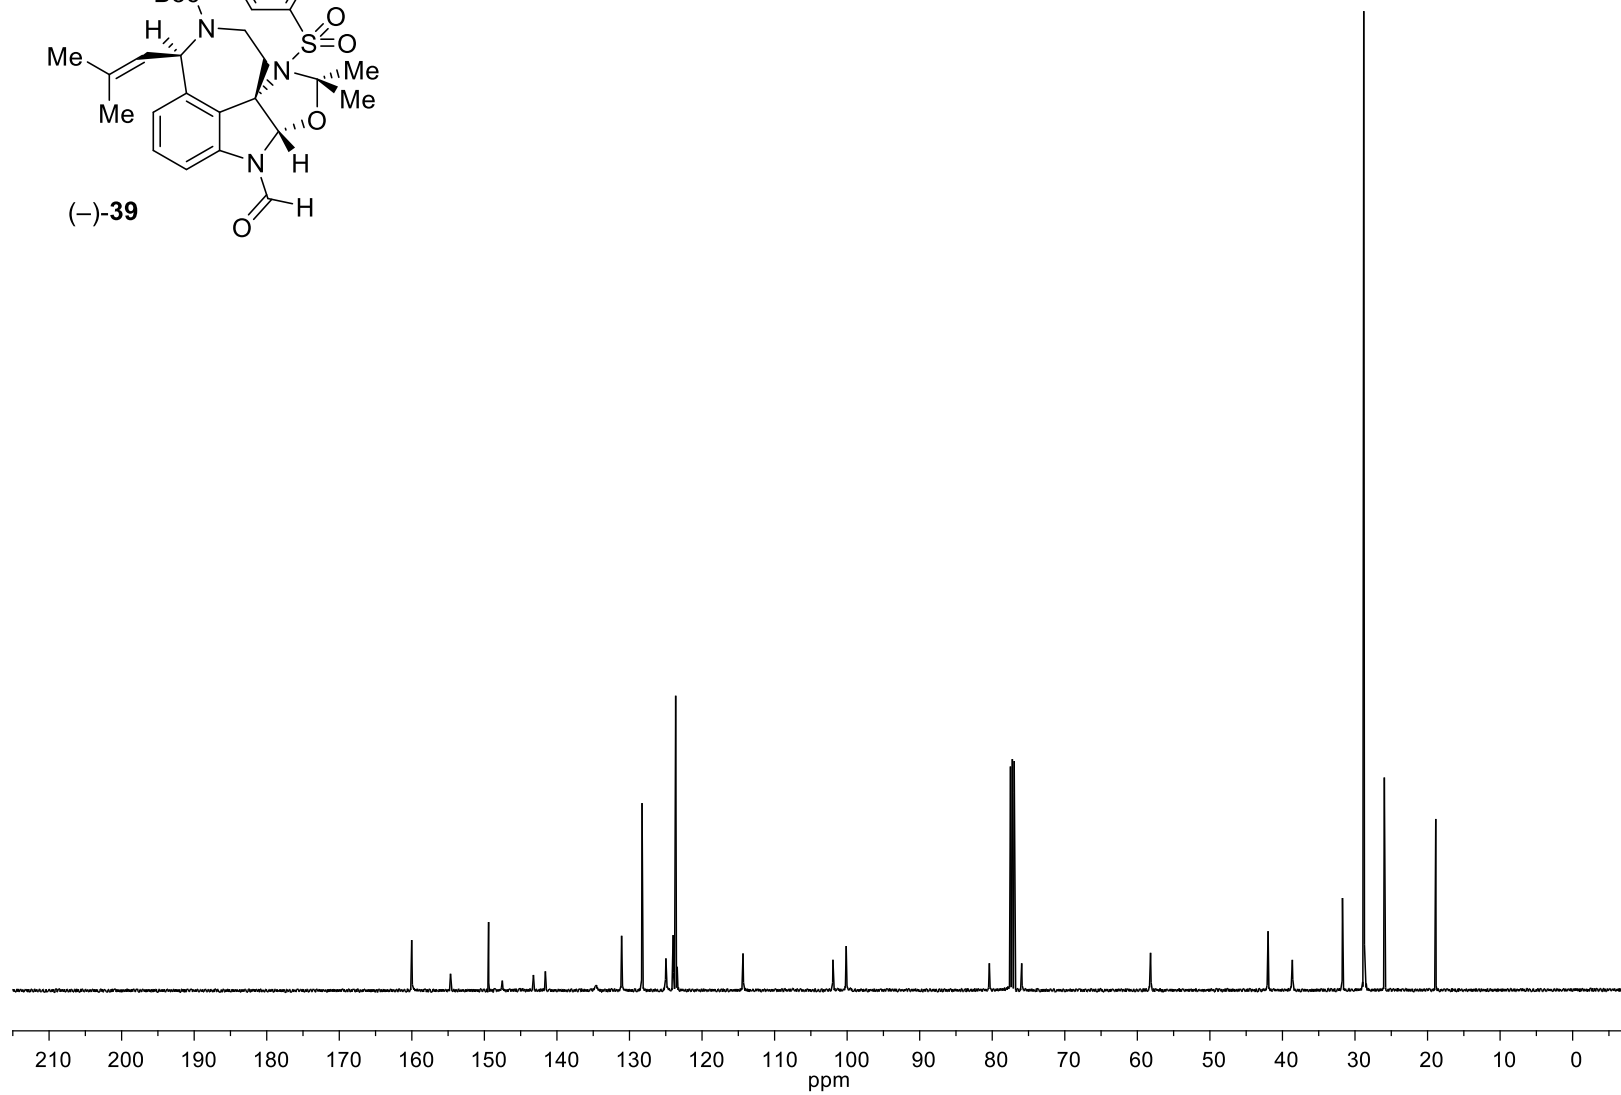

$^1\text{H}$  NMR, 500 MHz,  $\text{CDCl}_3$ , 20  $^\circ\text{C}$

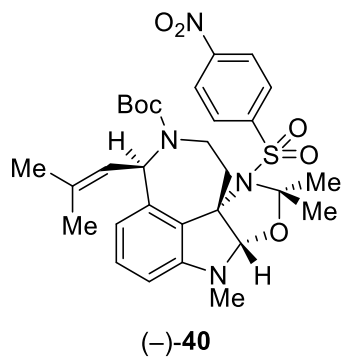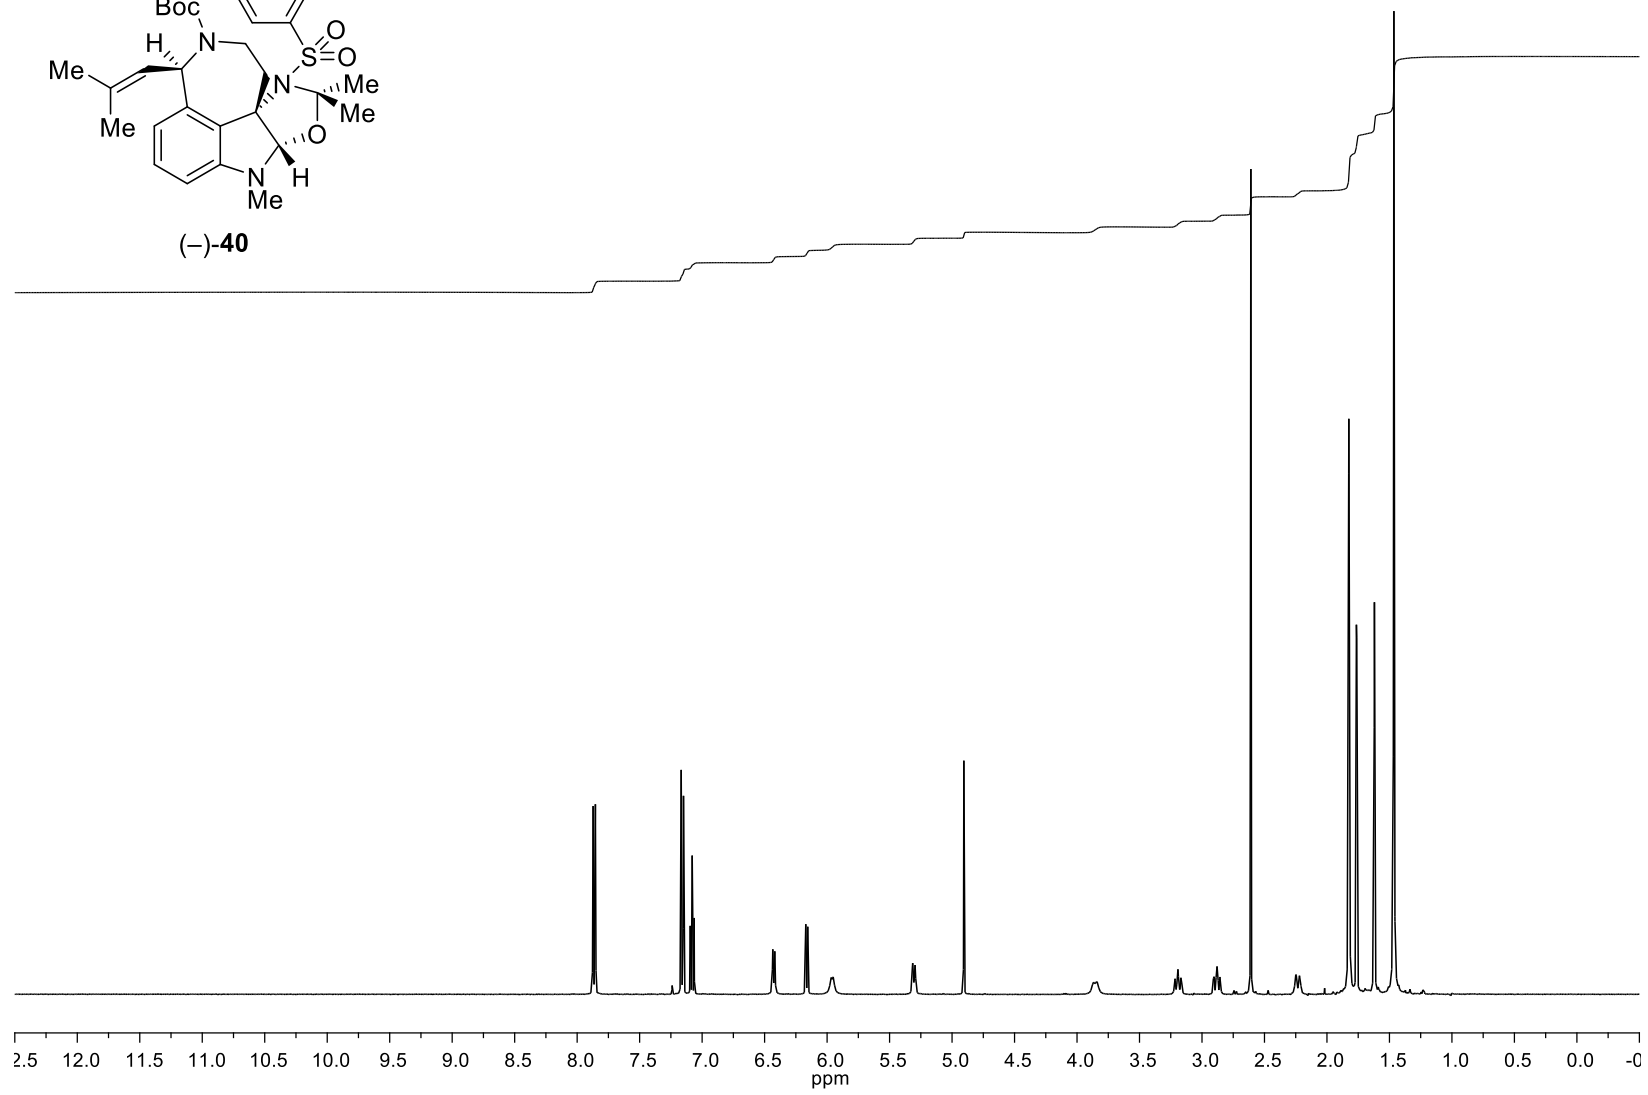

$^{13}\text{C}$  NMR, 126 MHz,  $\text{CDCl}_3$ , 20 °C

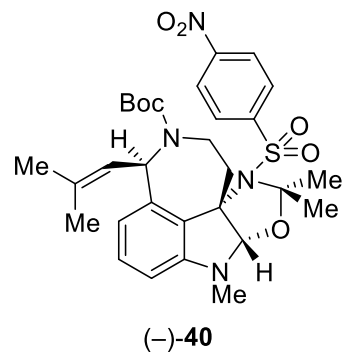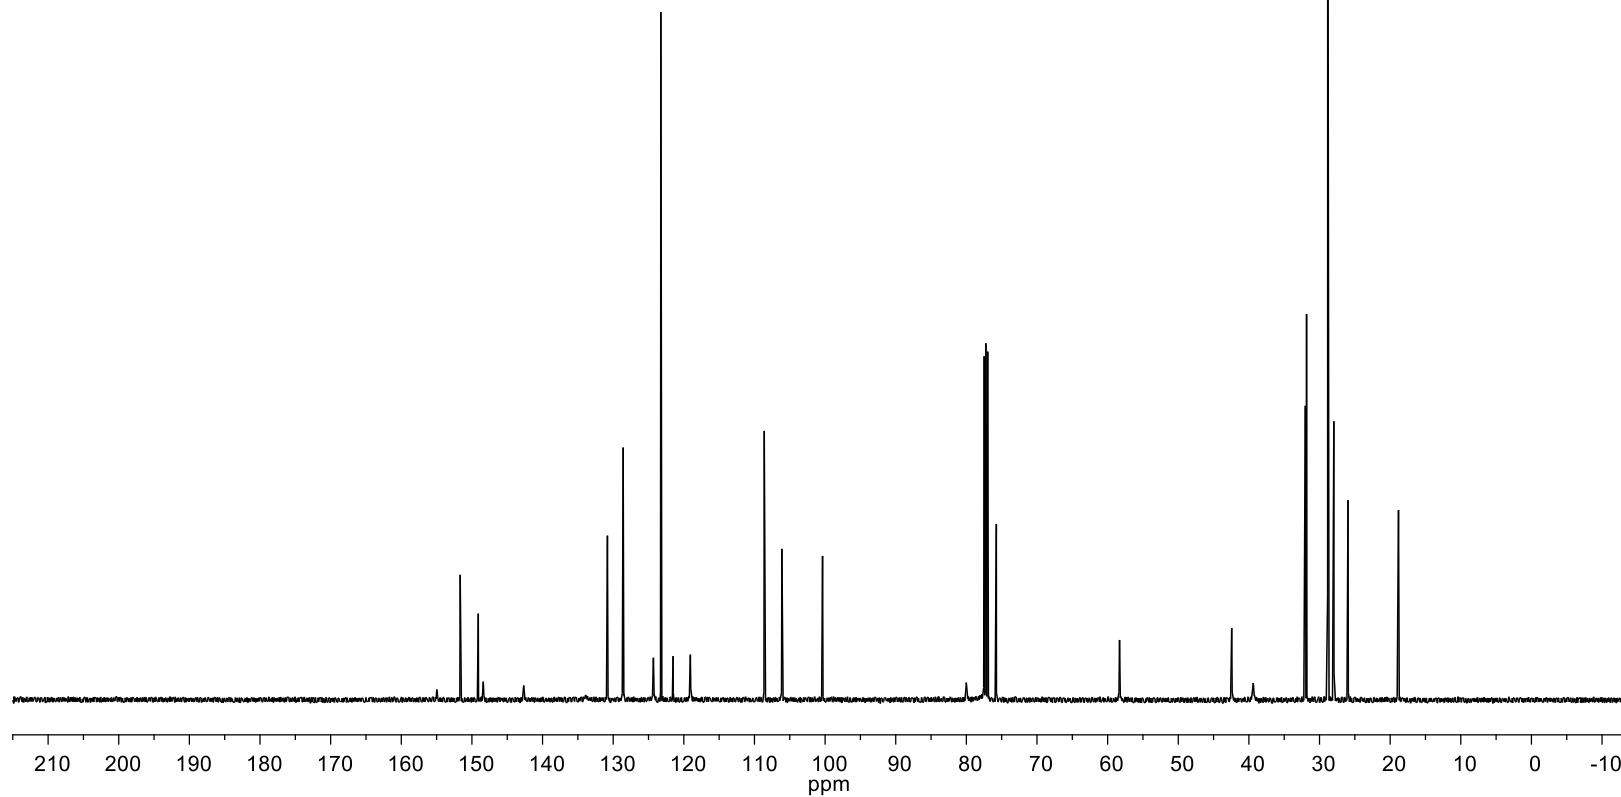

$^1\text{H}$  NMR, 500 MHz,  $\text{CD}_3\text{CN}$ , 70  $^\circ\text{C}$

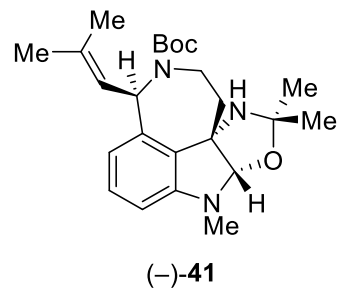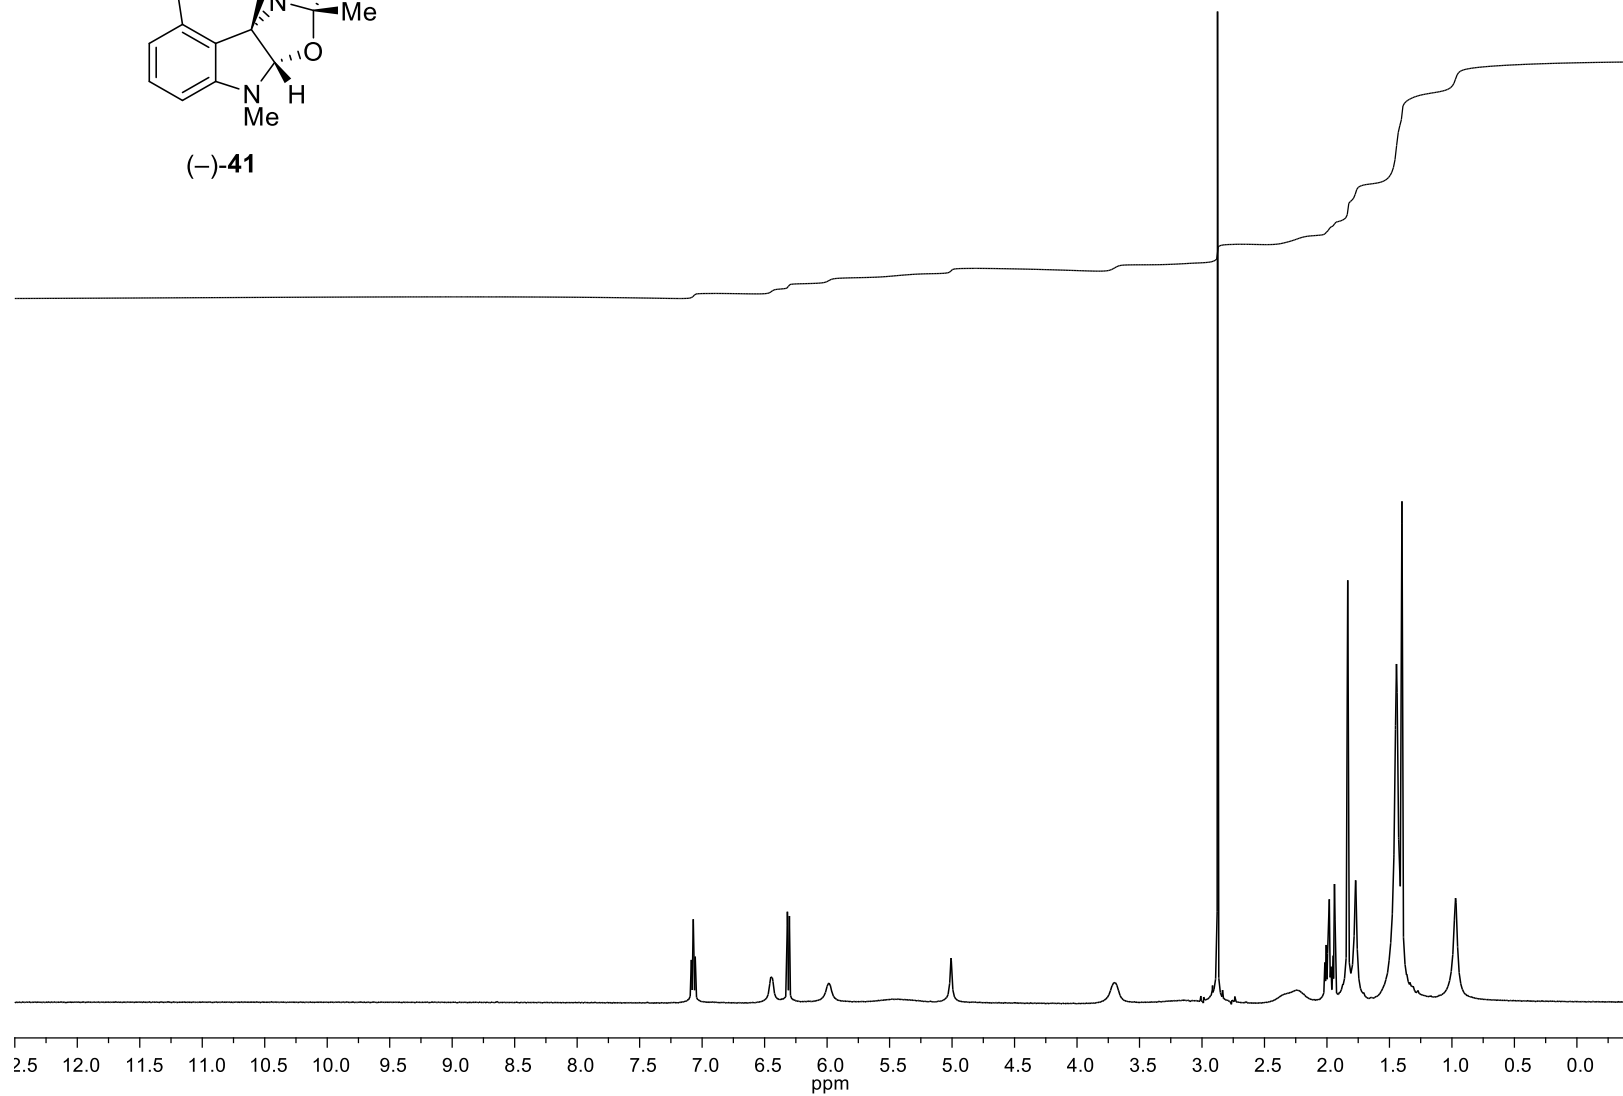



$^1\text{H}$  NMR, 500 MHz,  $\text{CD}_3\text{CN}$ , 20 °C

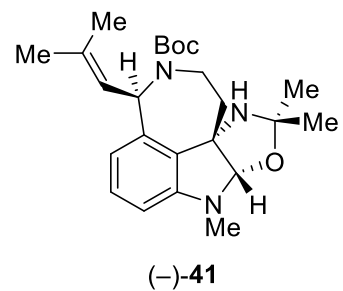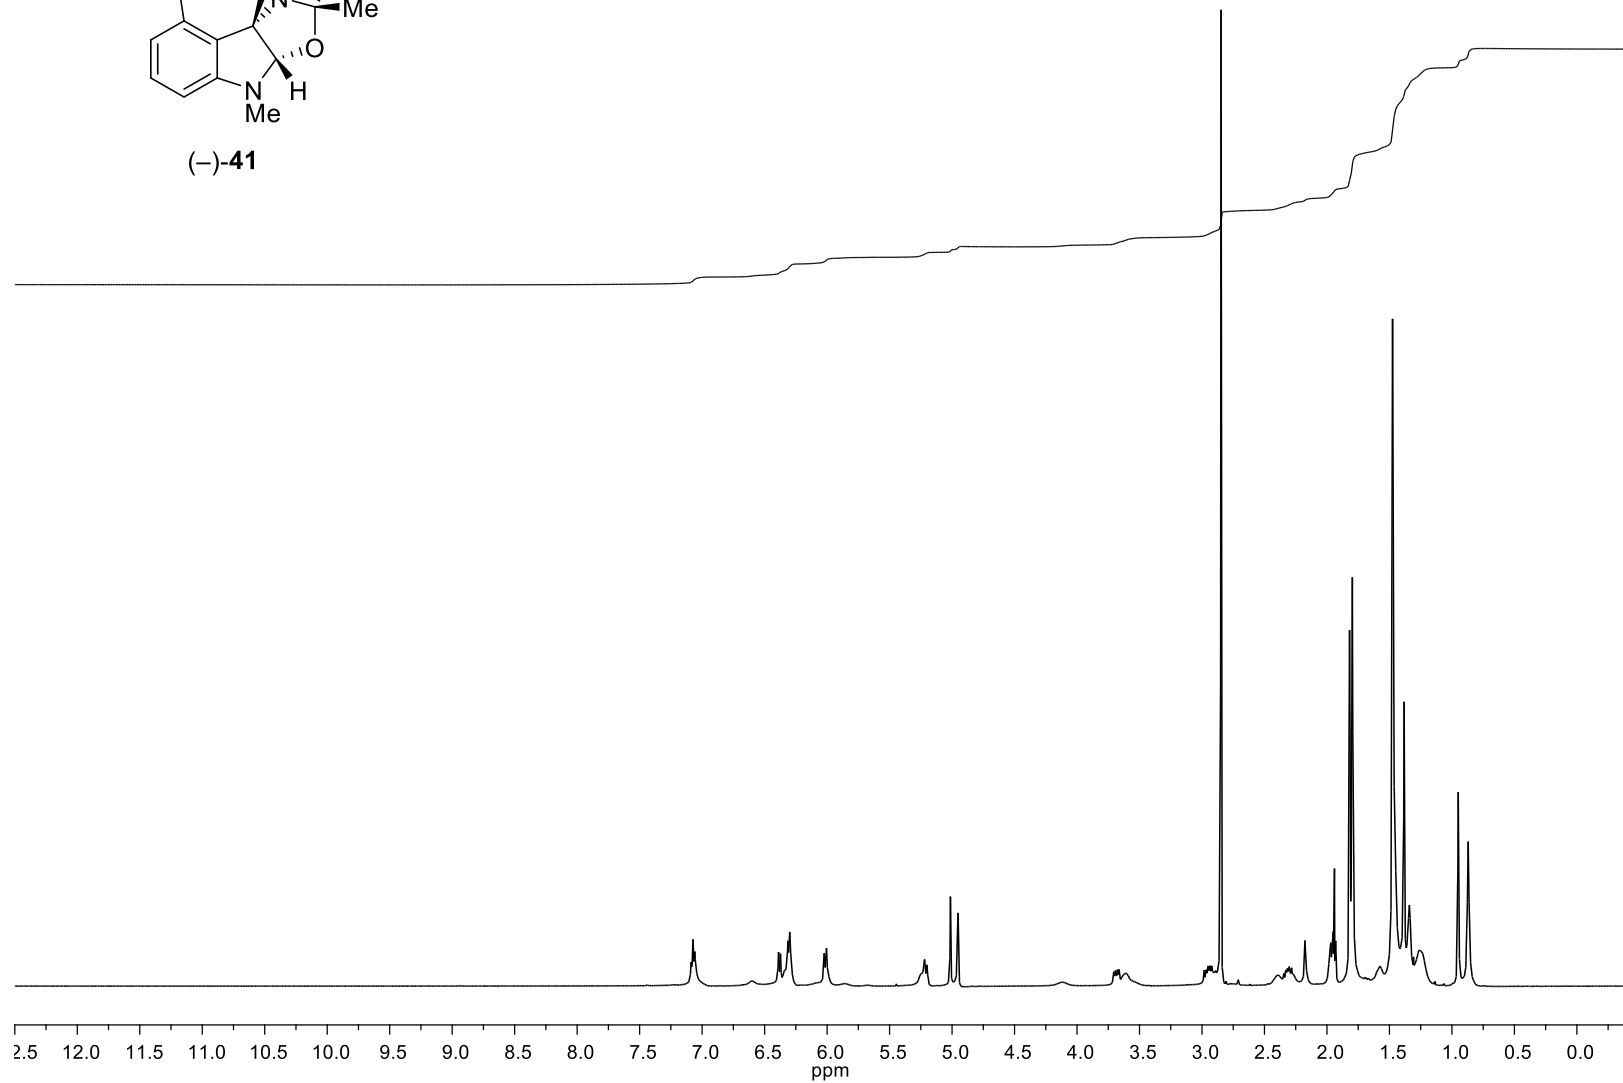

$^{13}\text{C}$  NMR, 126 MHz,  $\text{CD}_3\text{CN}$ , 20 °C

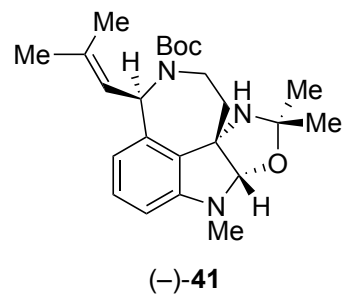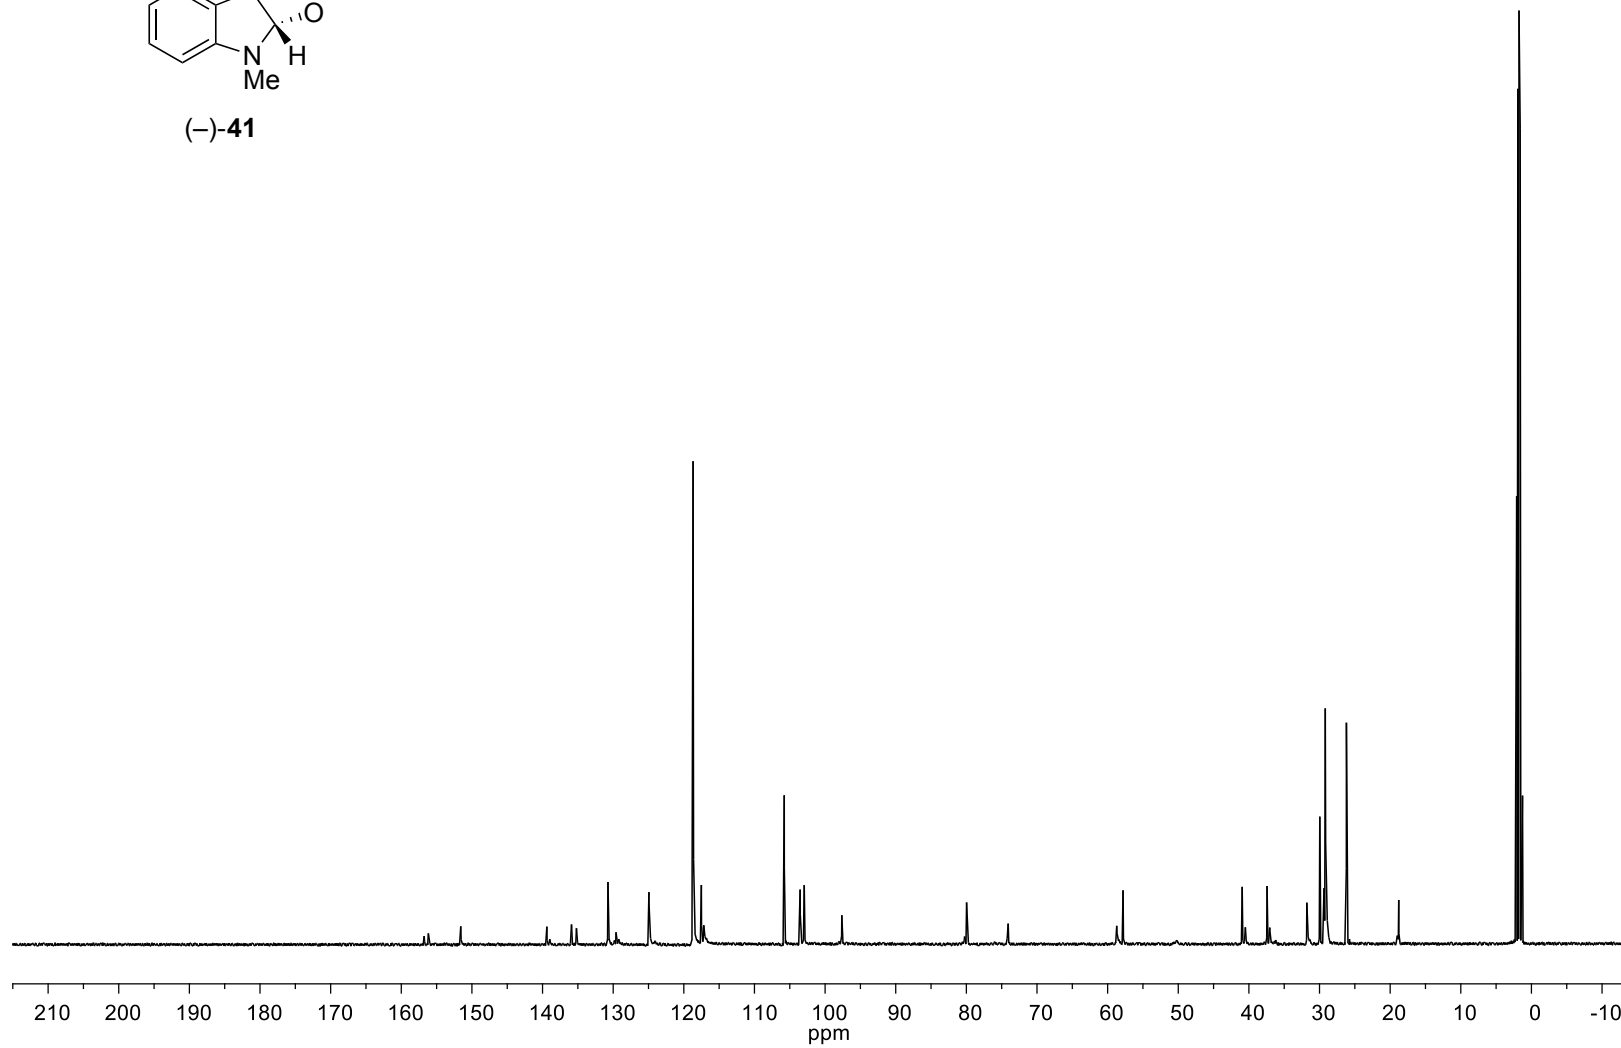

$^1\text{H}$  NMR, 500 MHz,  $\text{CD}_3\text{CN}$ , 60 °C

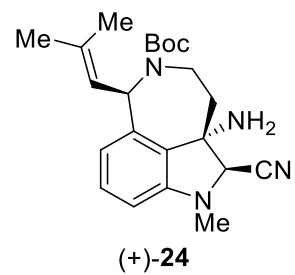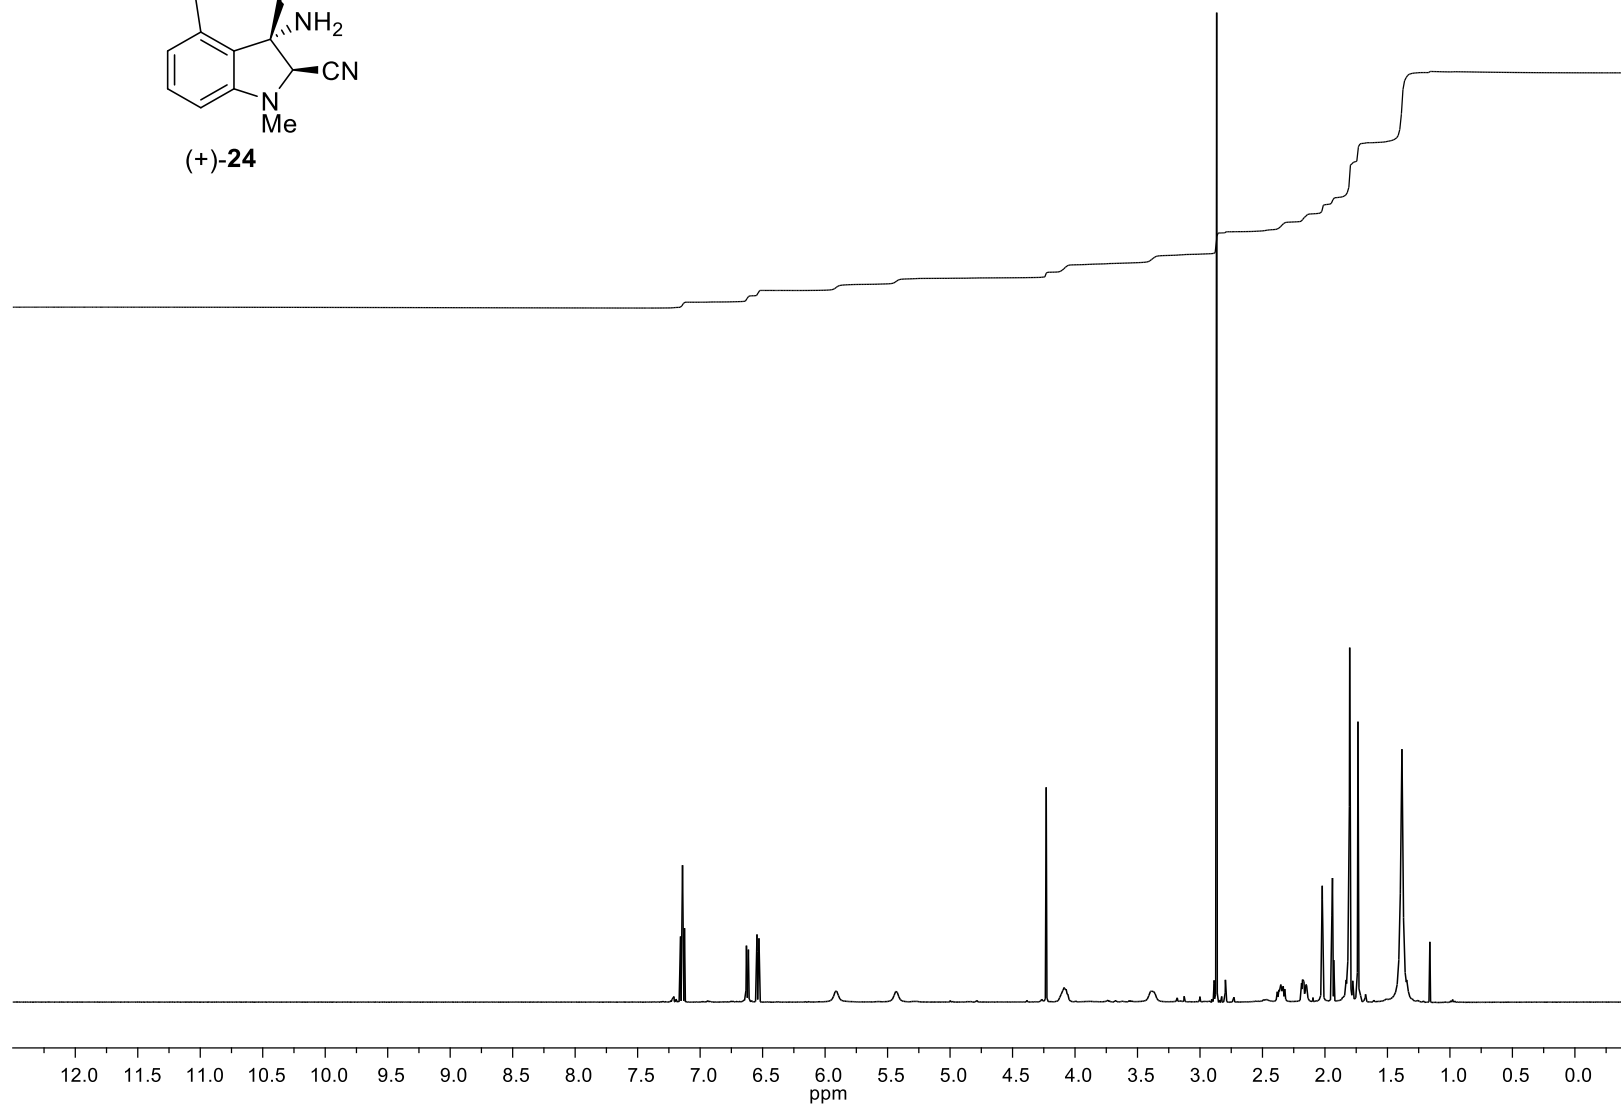

$^{13}\text{C}$  NMR, 126 MHz,  $\text{CD}_3\text{CN}$ , 60 °C

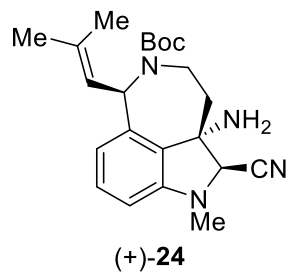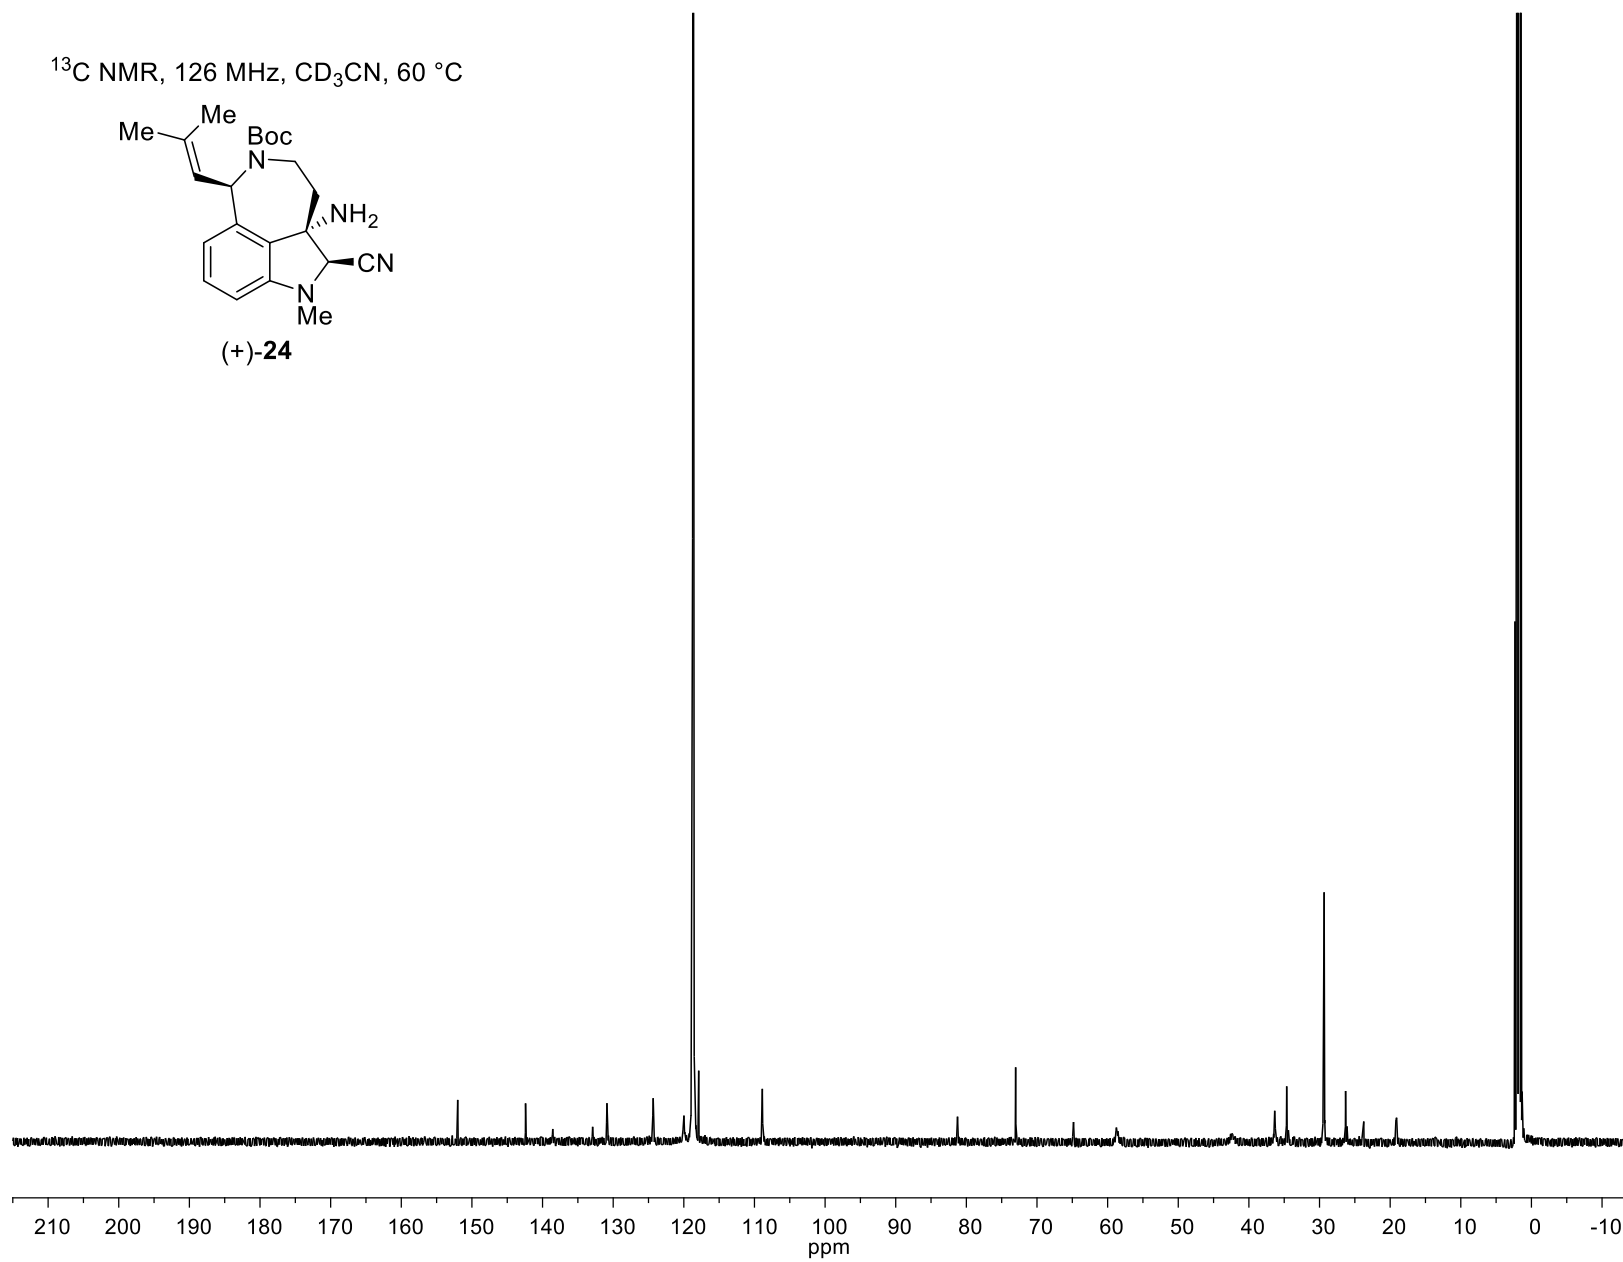

$^1\text{H}$  NMR, 500 MHz,  $\text{CDCl}_3$ , 20 °C

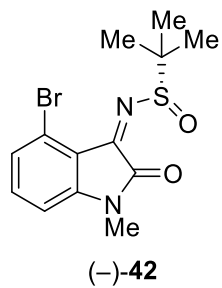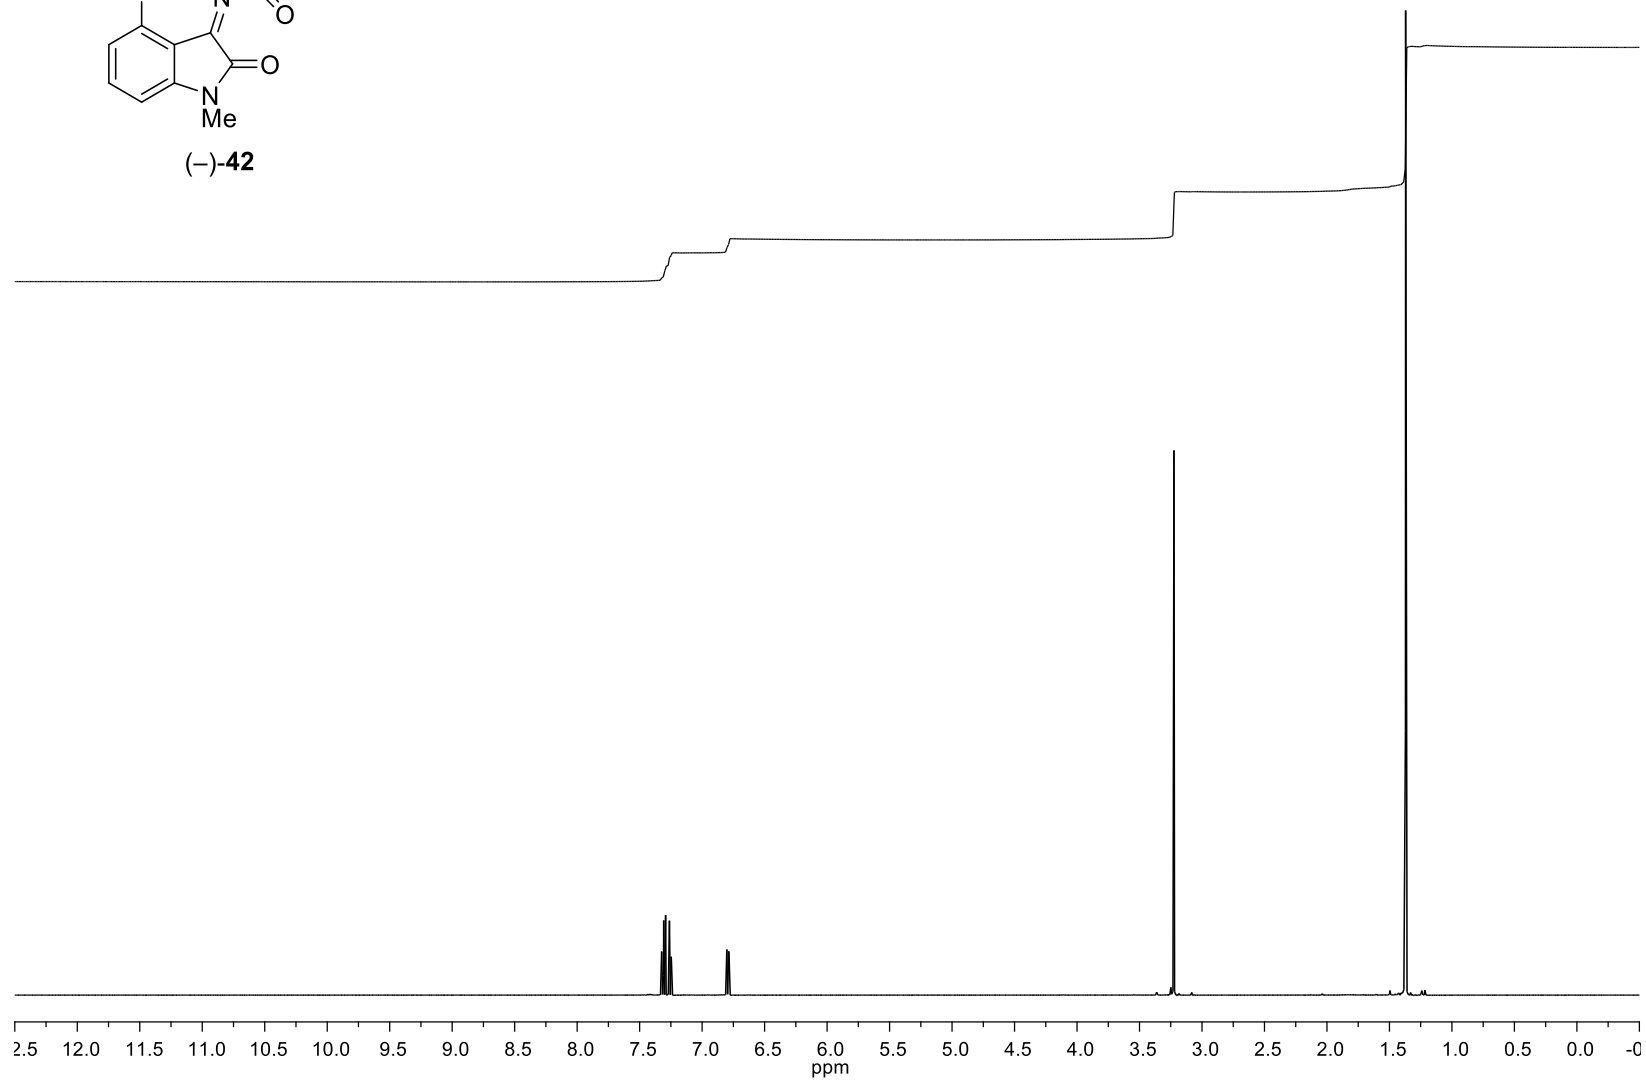

$^{13}\text{C}$  NMR, 126 MHz,  $\text{CDCl}_3$ , 20 °C

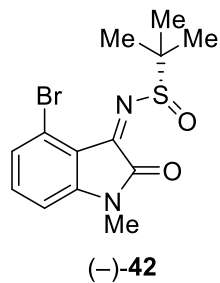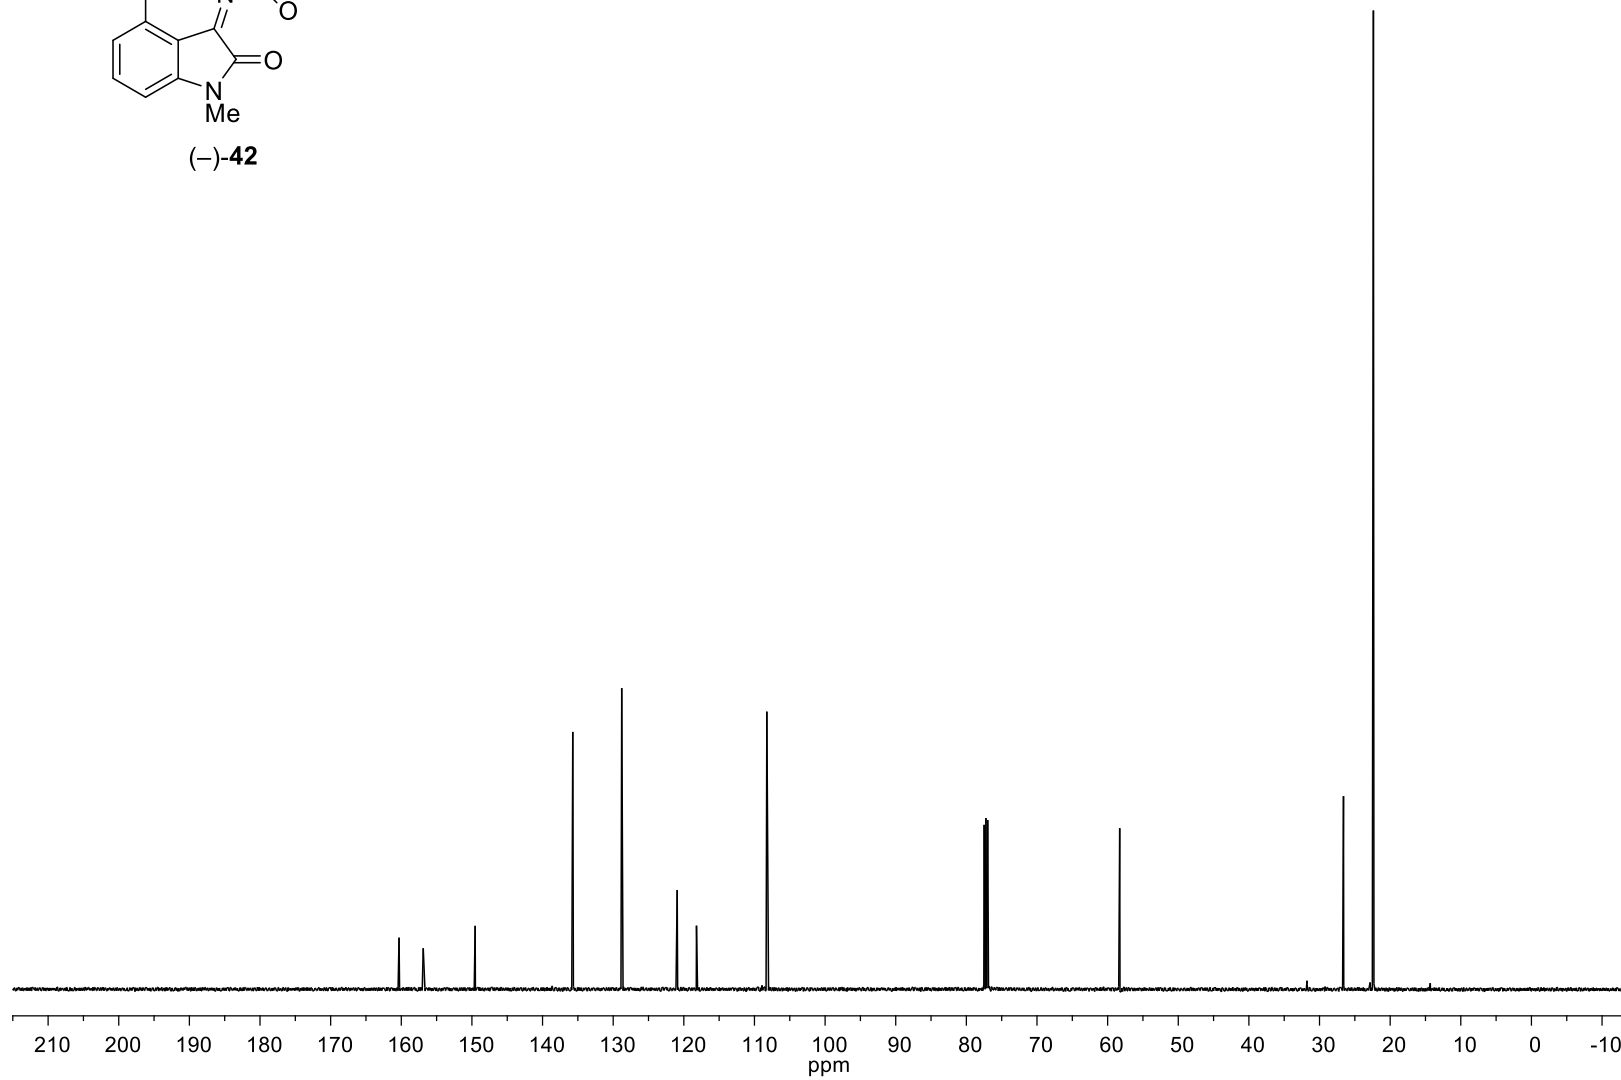

$^1\text{H}$  NMR, 500 MHz,  $\text{CDCl}_3$ , 20  $^\circ\text{C}$

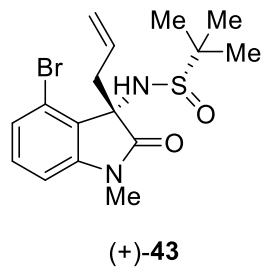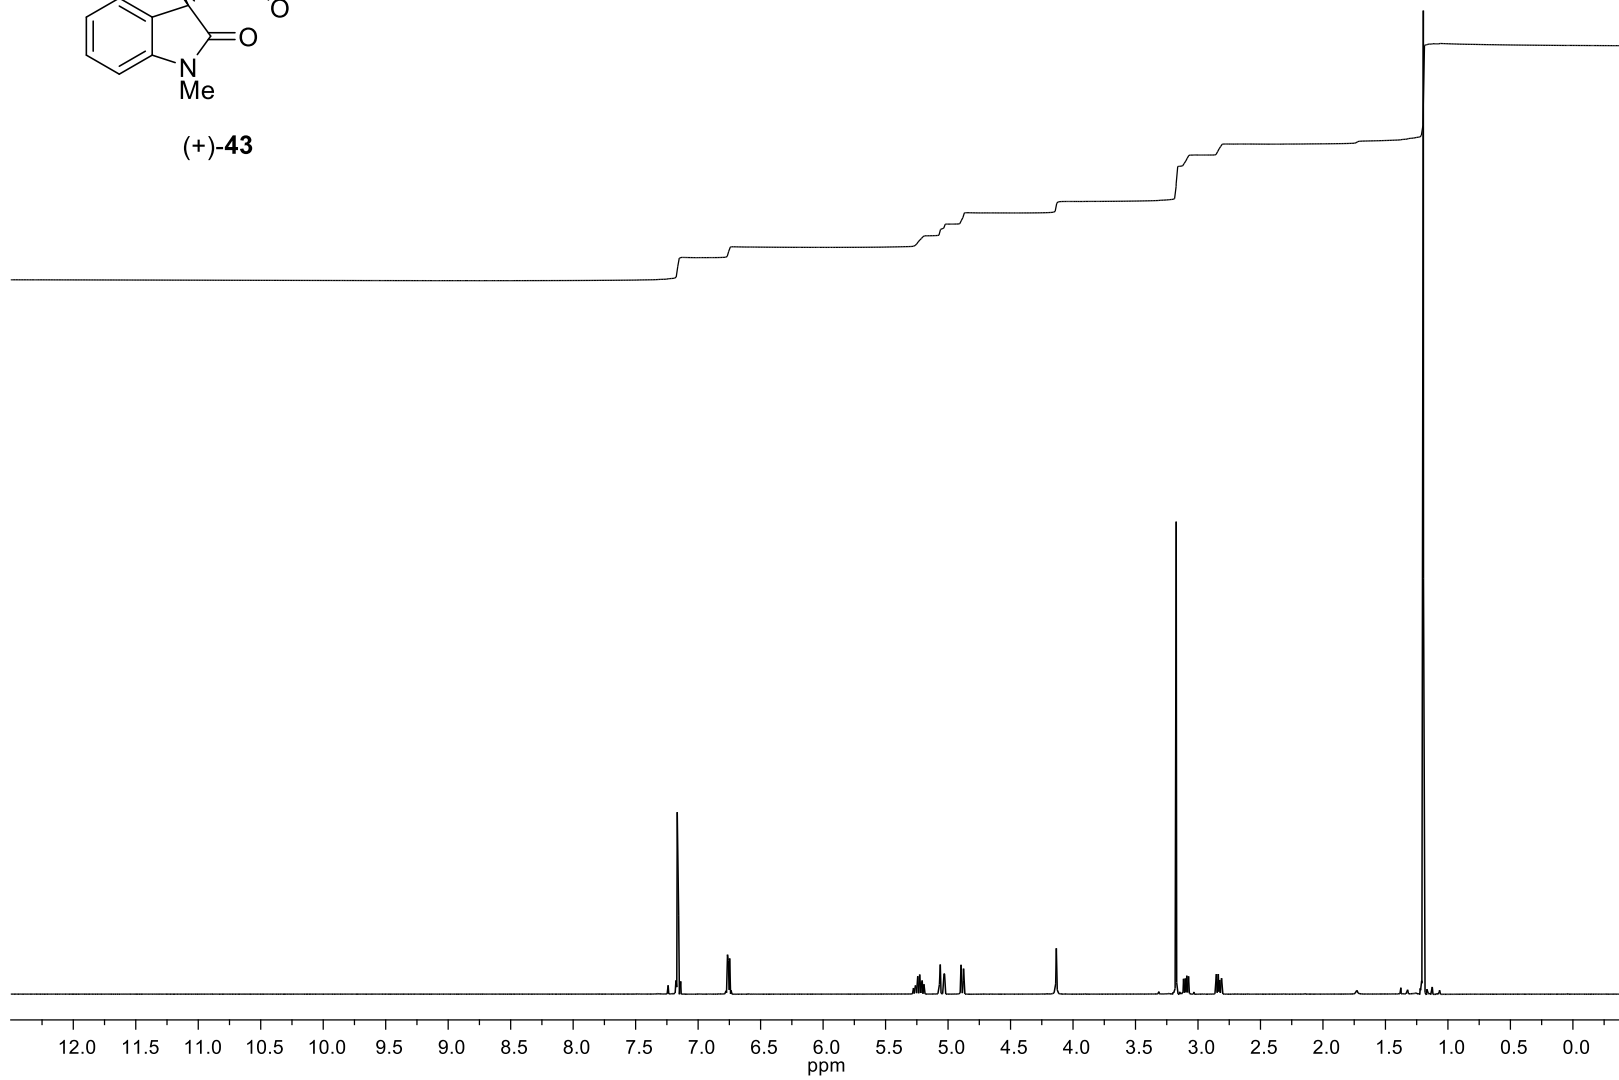

$^{13}\text{C}$  NMR, 126 MHz,  $\text{CDCl}_3$ , 20 °C

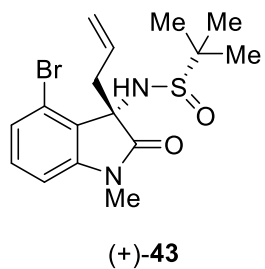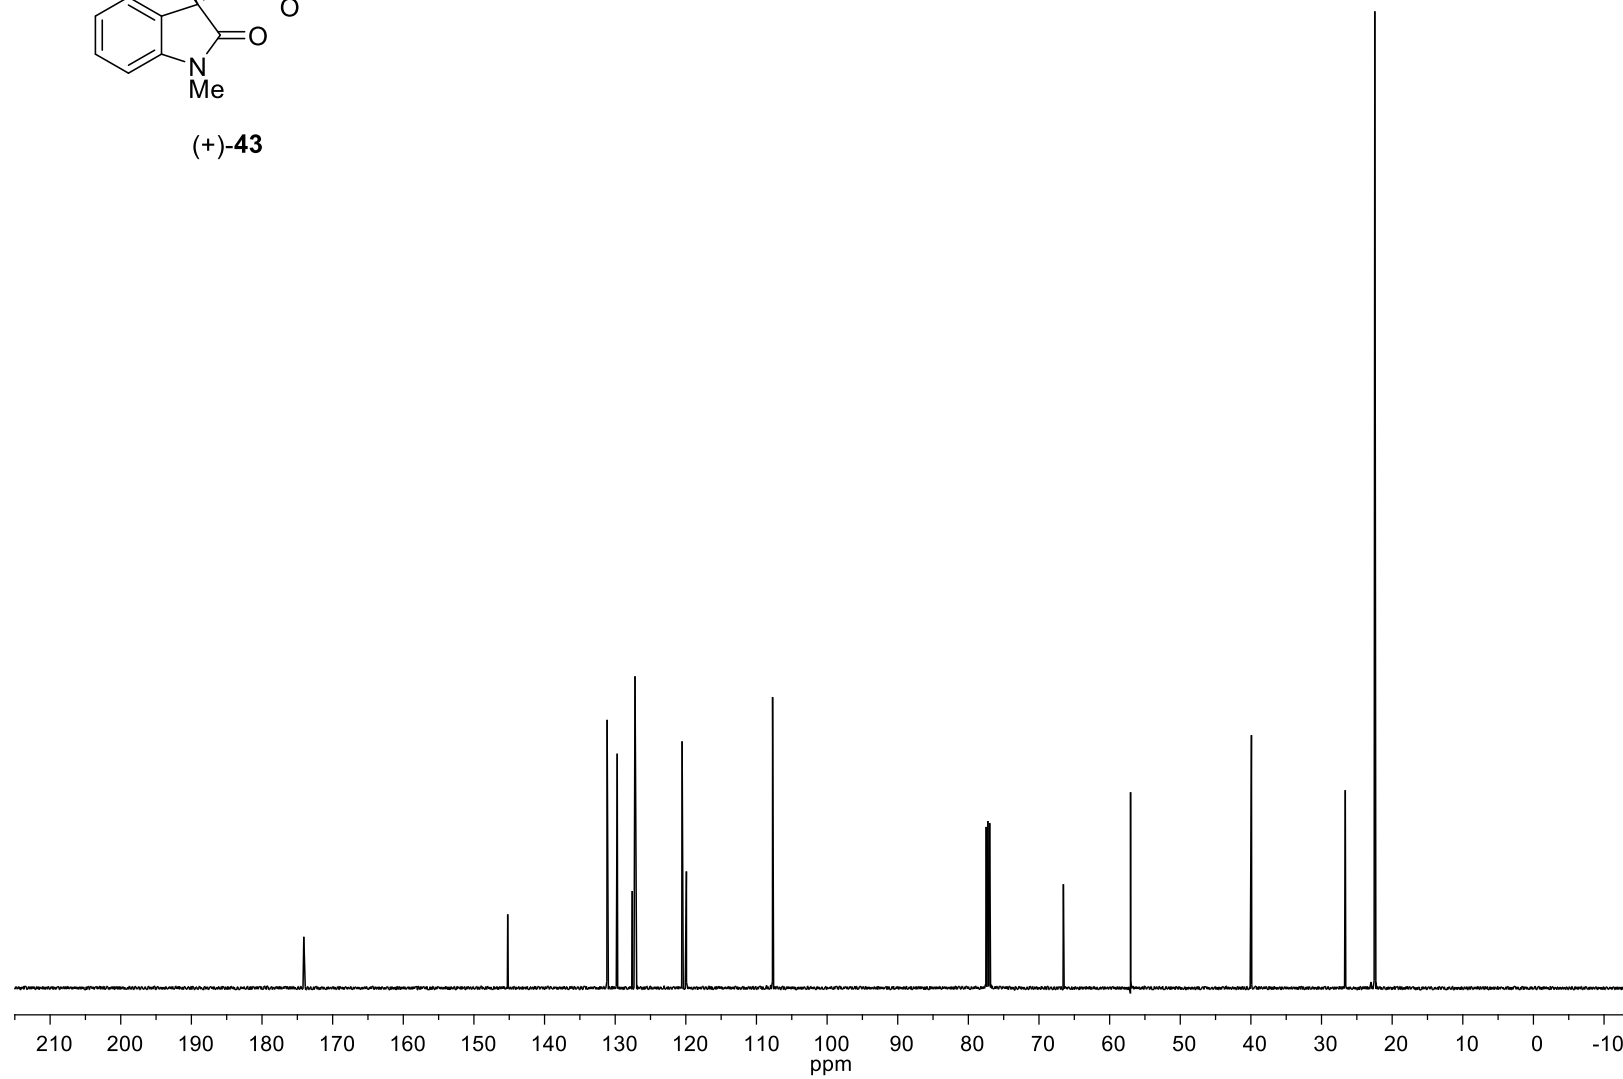



$^1\text{H}$  NMR, 500 MHz,  $\text{CDCl}_3$ , 20  $^\circ\text{C}$

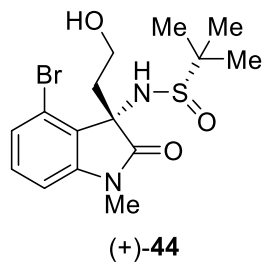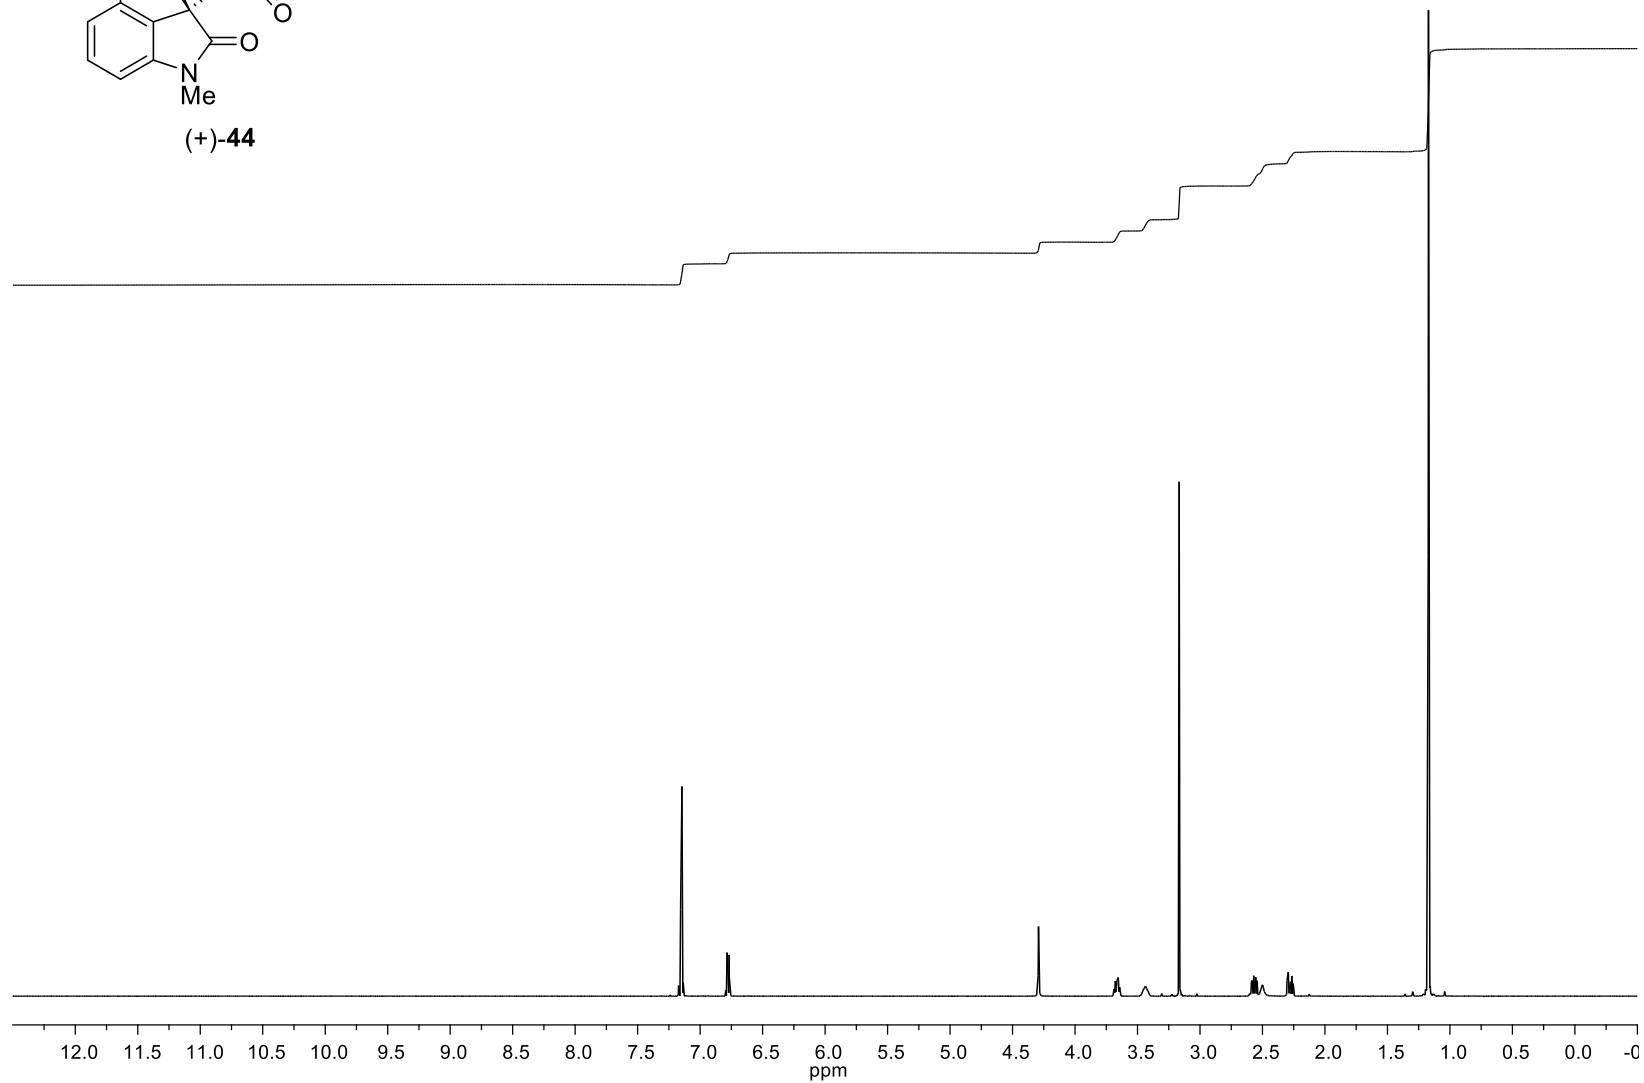

$^{13}\text{C}$  NMR, 126 MHz,  $\text{CDCl}_3$ , 20 °C

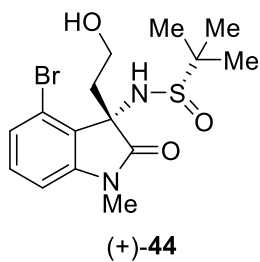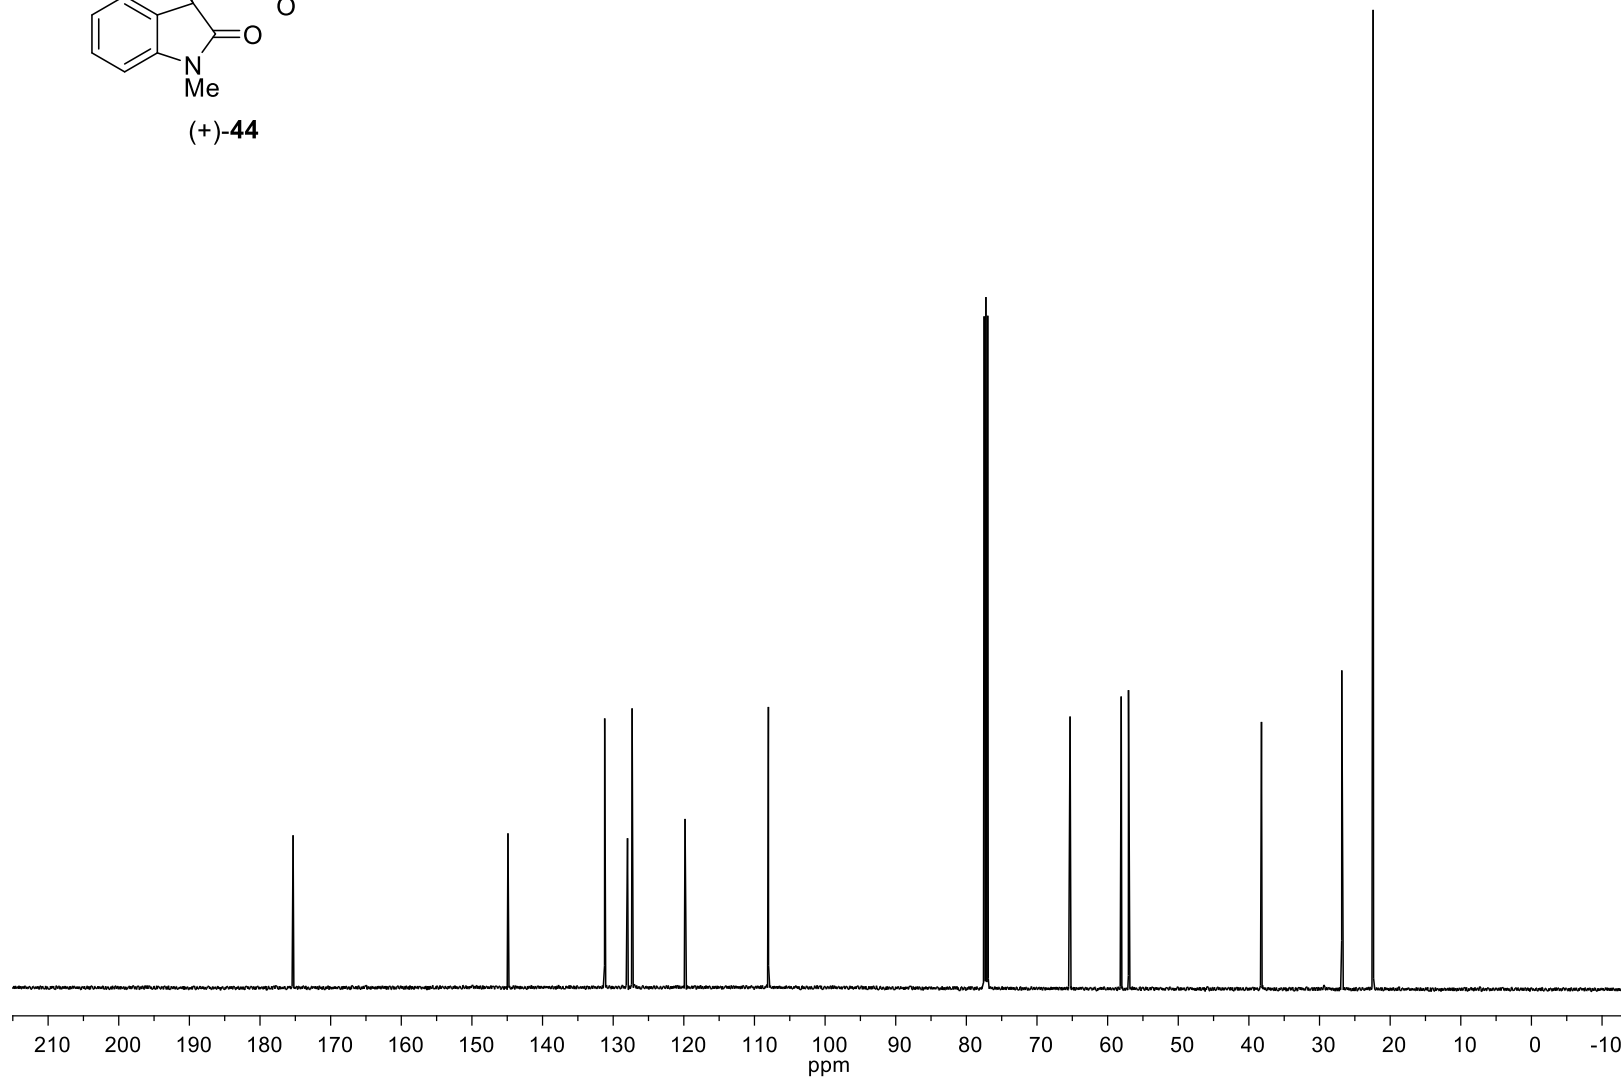

$^1\text{H}$  NMR, 500 MHz,  $\text{CDCl}_3$ , 20 °C

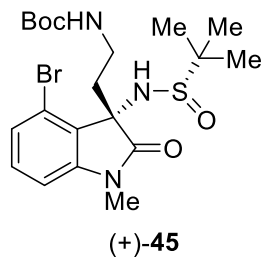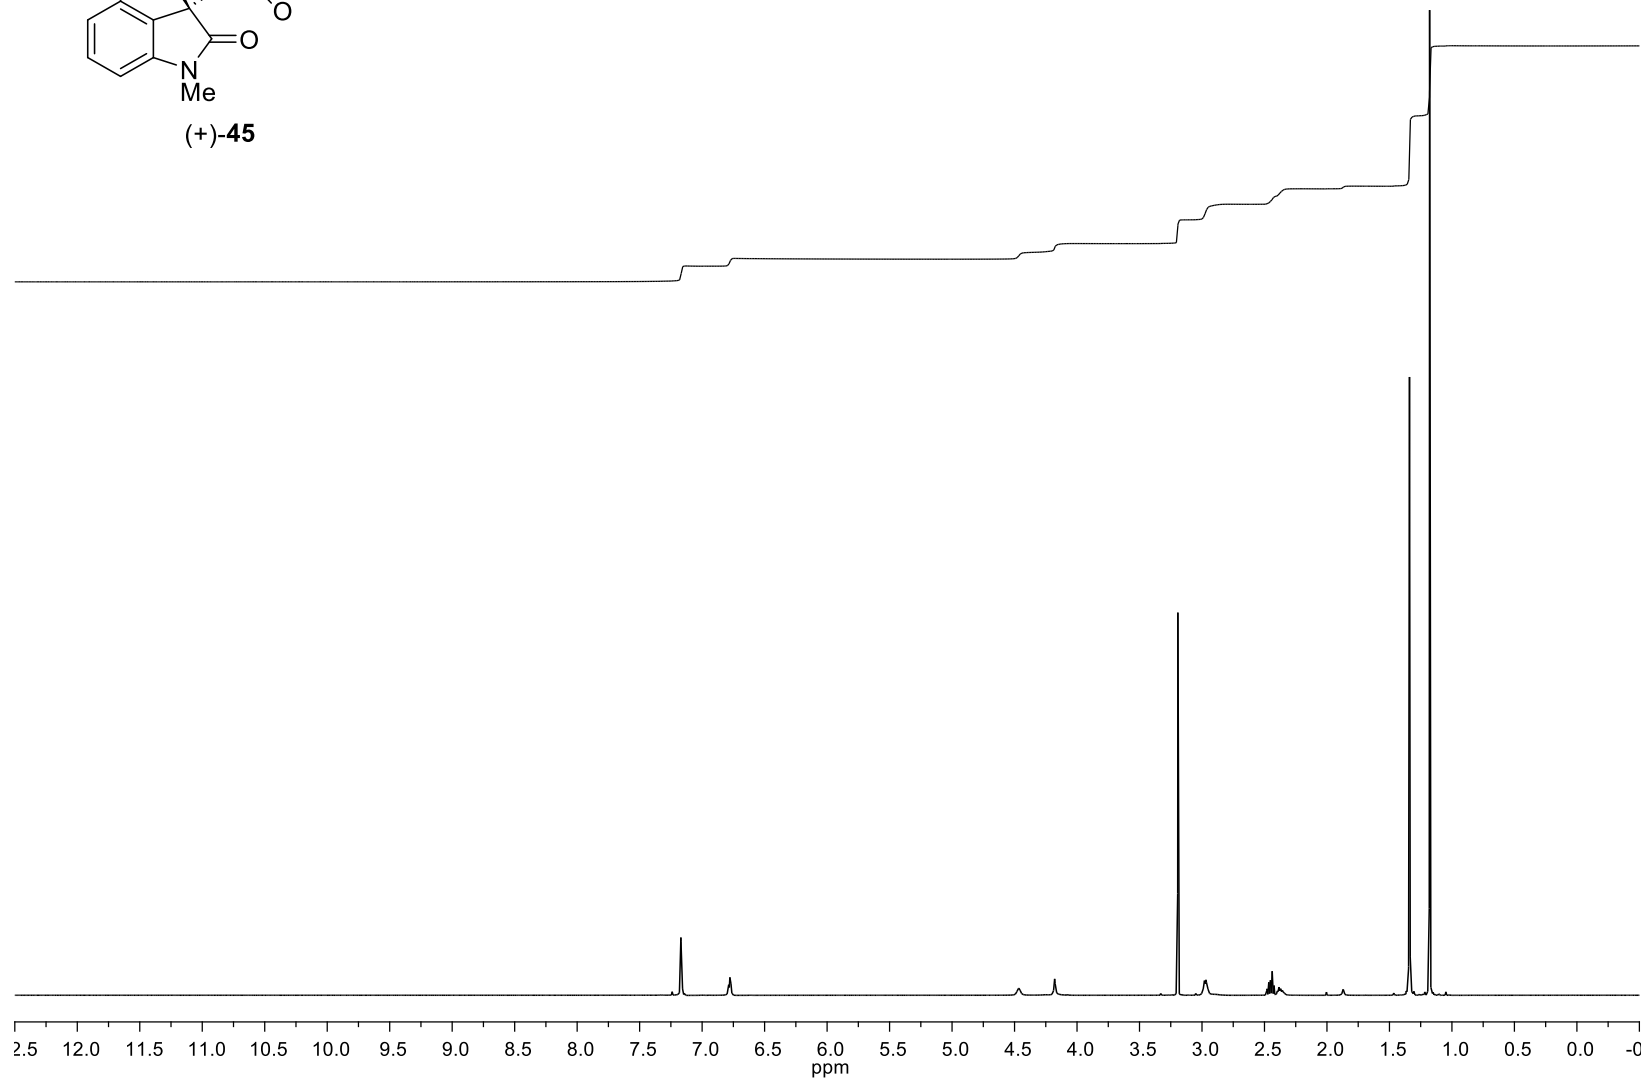

$^{13}\text{C}$  NMR, 126 MHz,  $\text{CDCl}_3$ , 20 °C

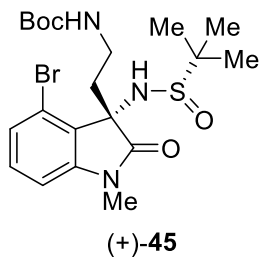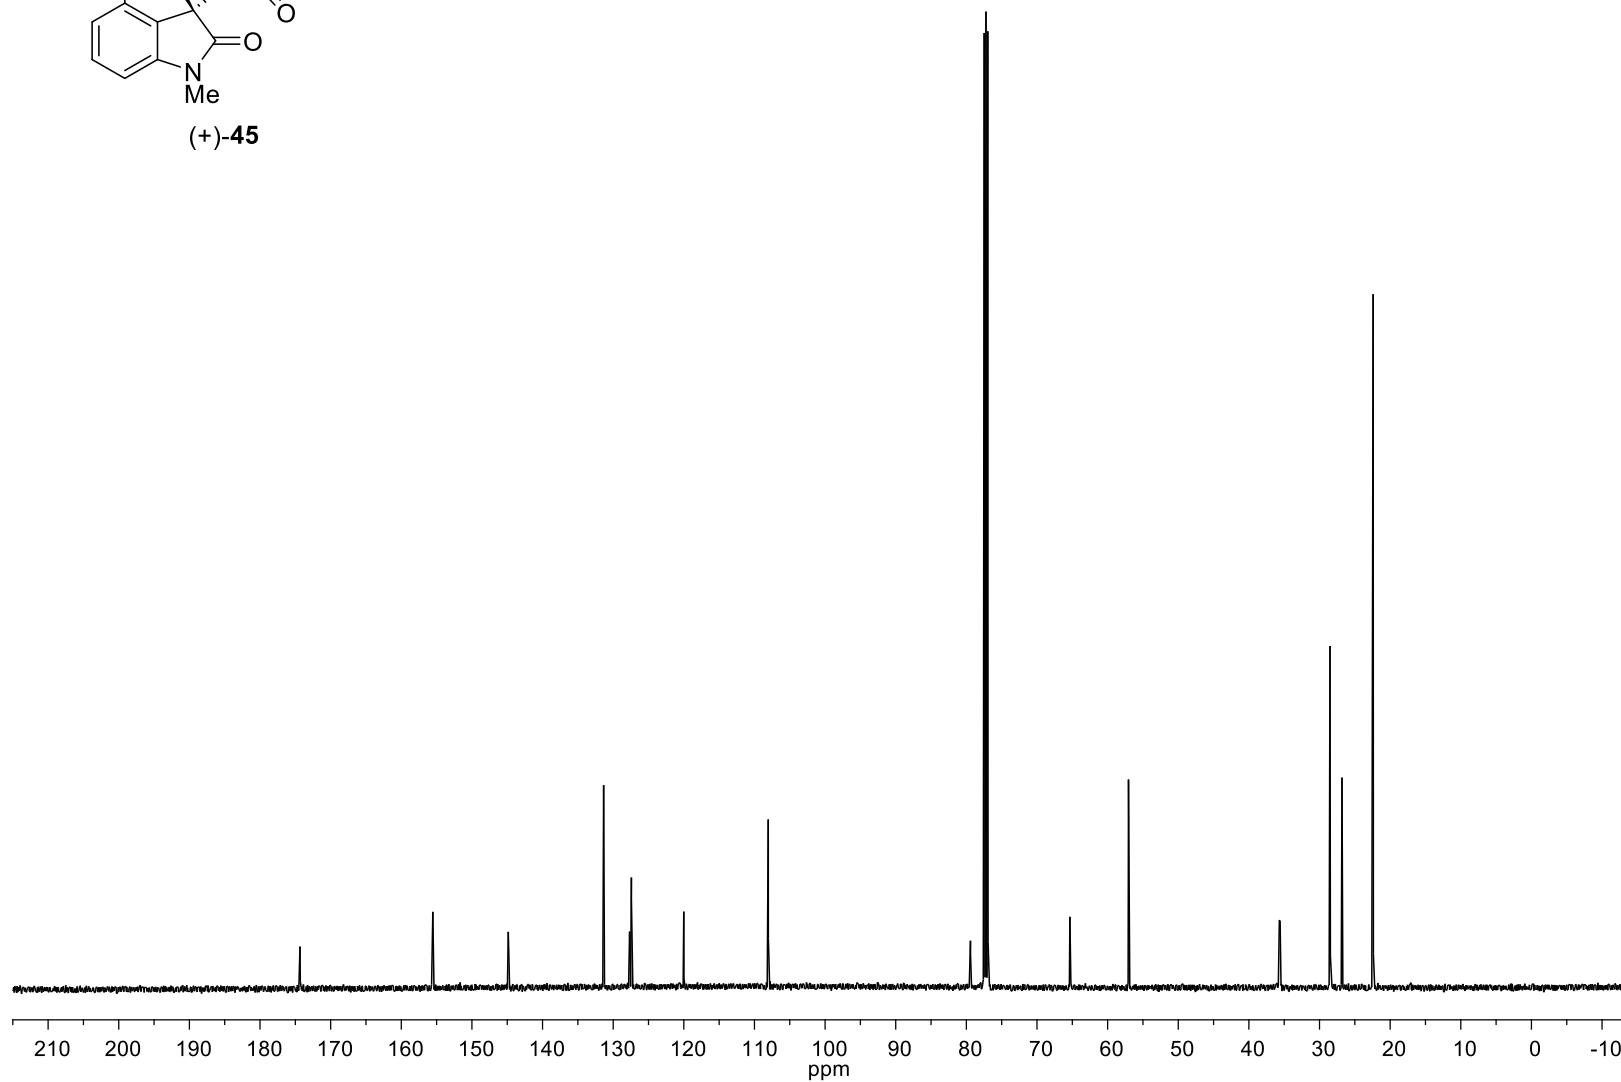

$^1\text{H}$  NMR, 500 MHz,  $\text{CDCl}_3$ , 20 °C

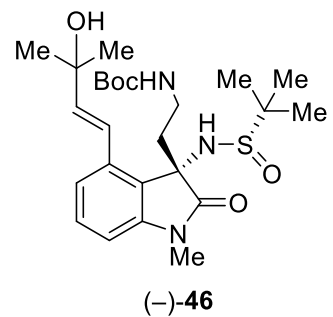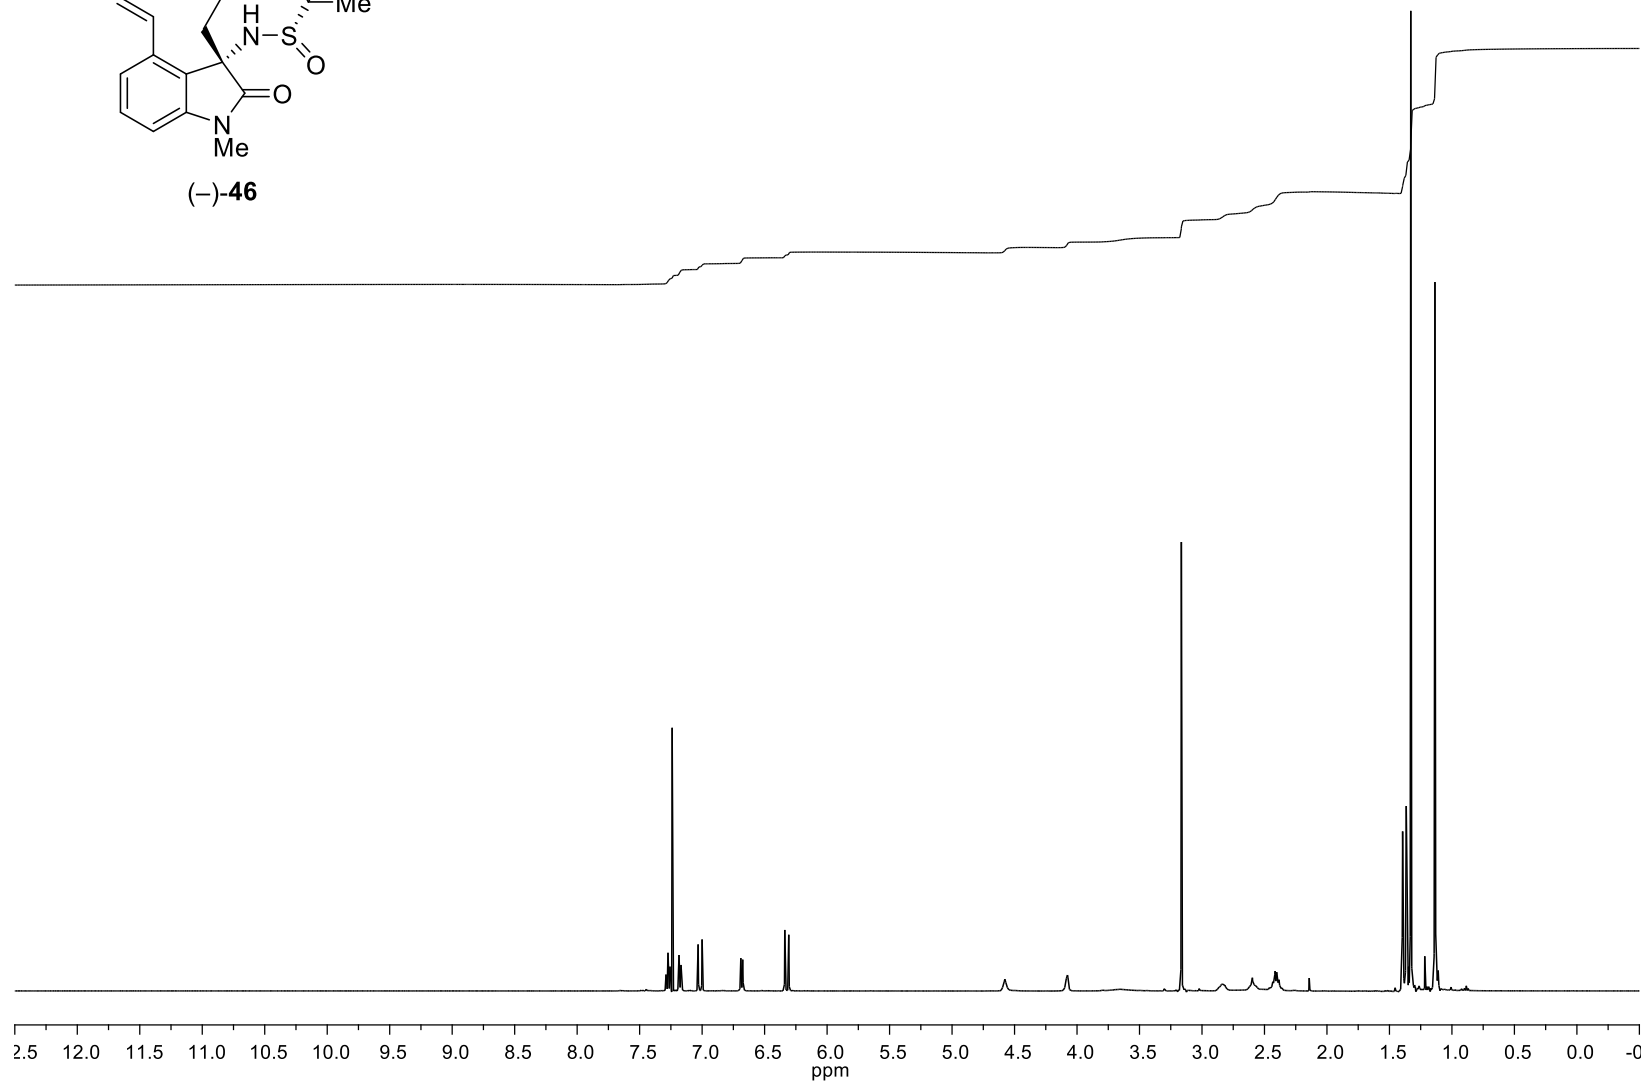

$^{13}\text{C}$  NMR, 126 MHz,  $\text{CDCl}_3$ , 20 °C

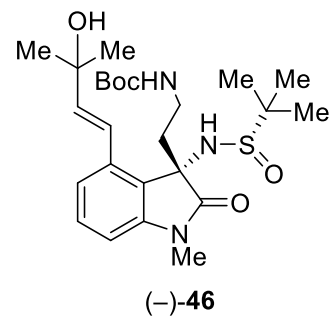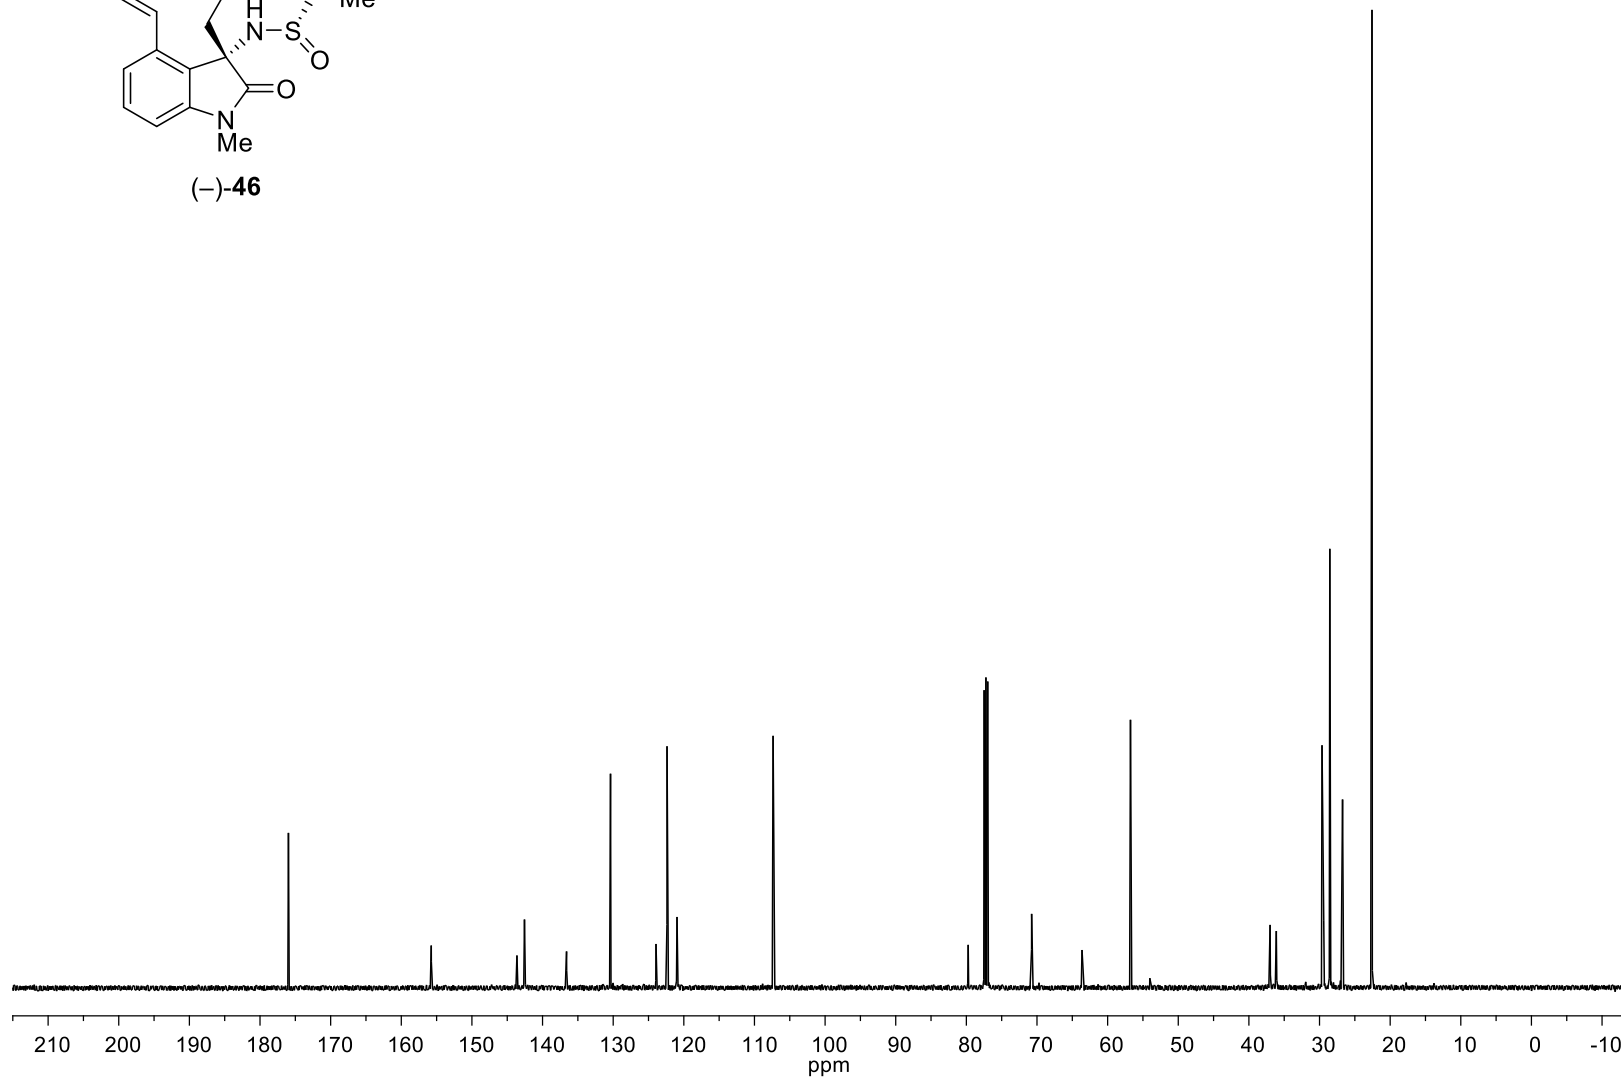

$^1\text{H}$  NMR, 500 MHz,  $\text{CDCl}_3$ , 20 °C

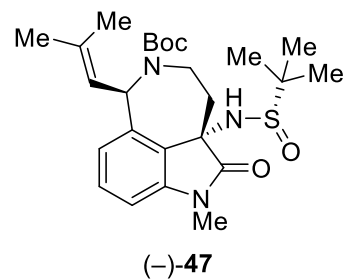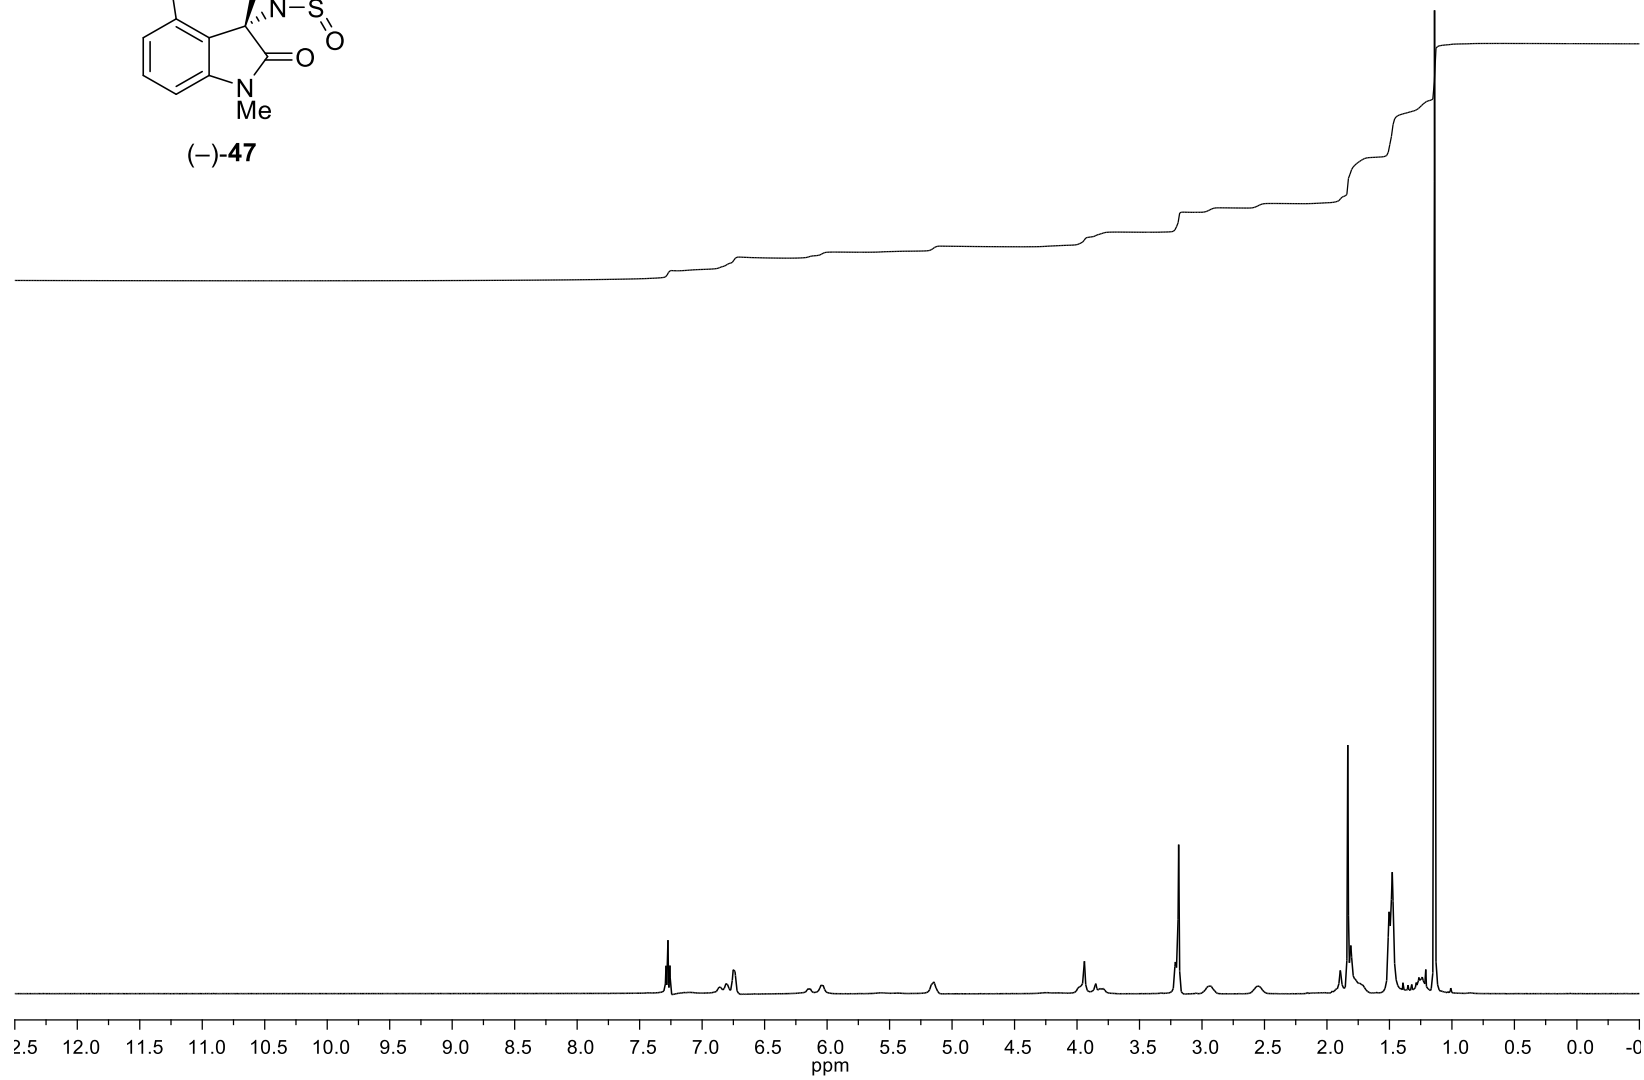

$^{13}\text{C}$  NMR, 126 MHz,  $\text{CDCl}_3$ , 20 °C

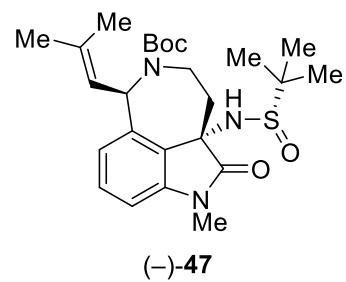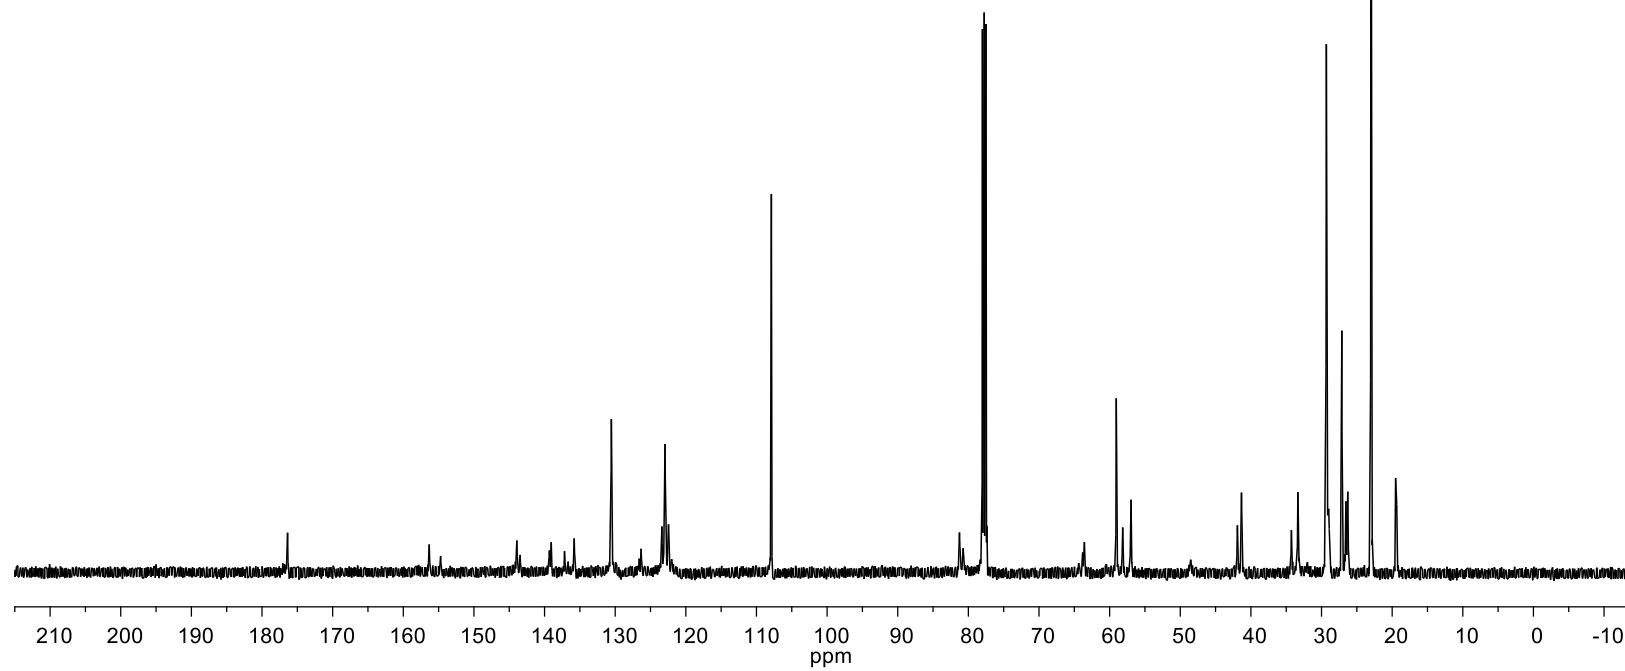



$^1\text{H}$  NMR, 500 MHz,  $\text{CD}_3\text{CN}$ , 60  $^\circ\text{C}$

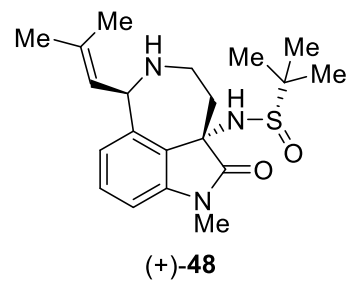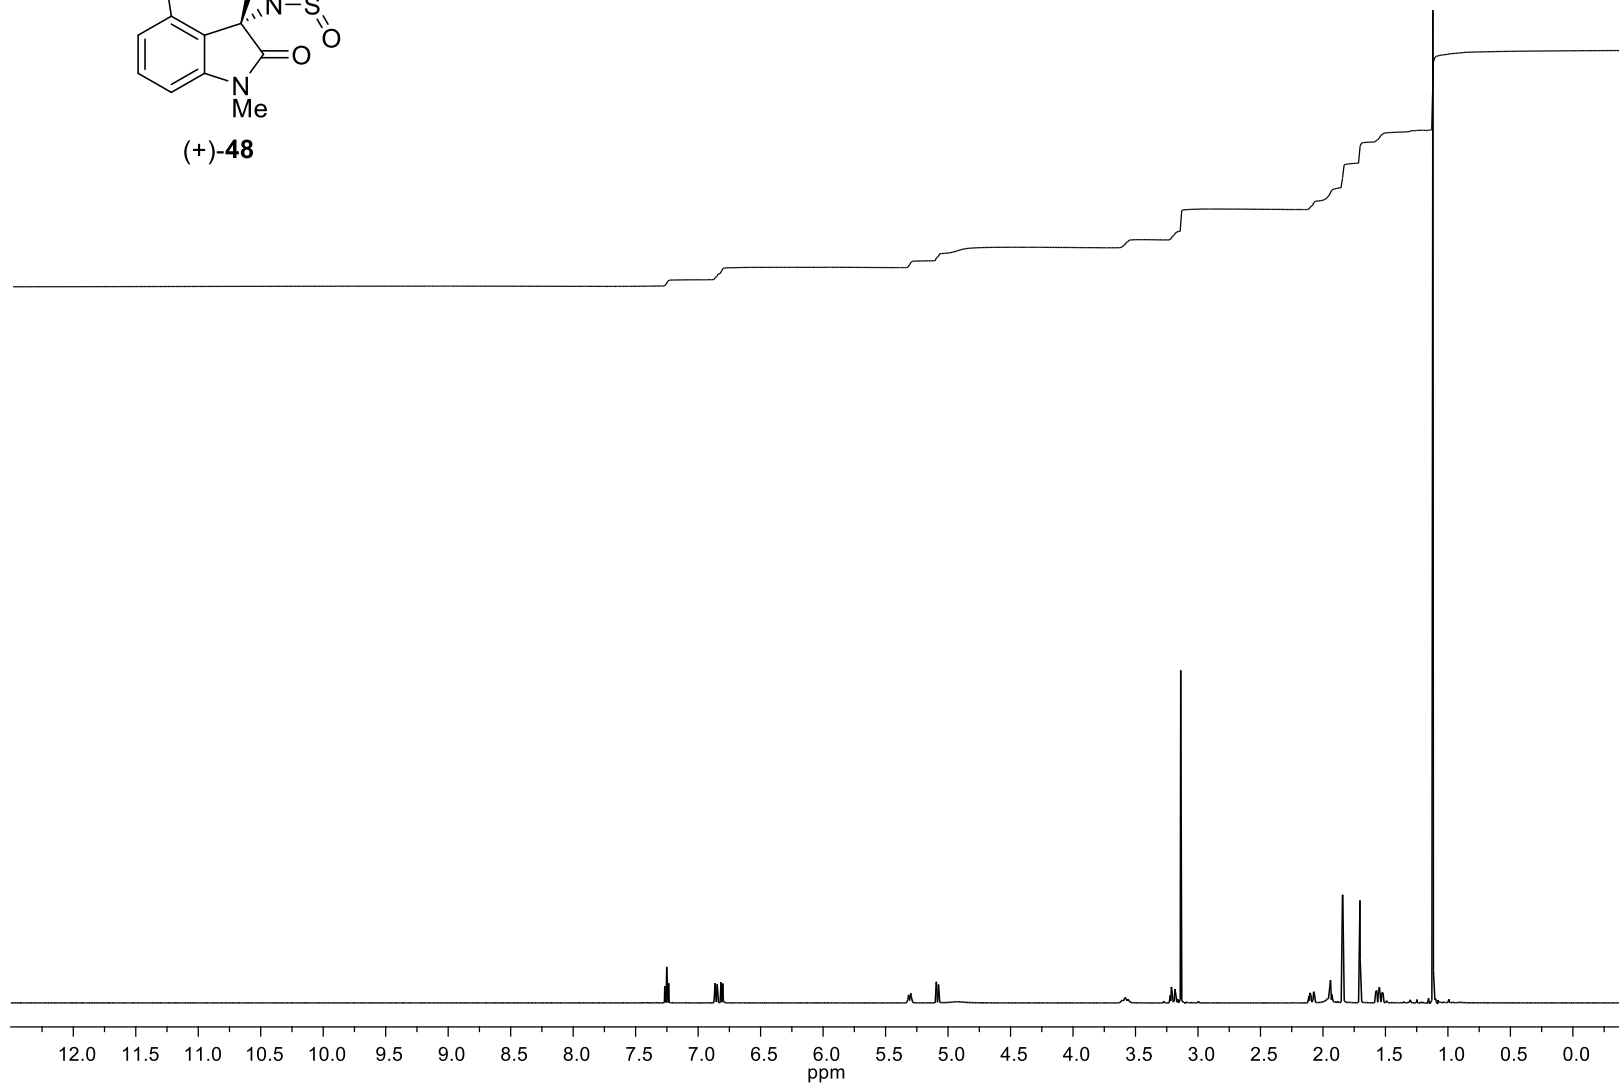

$^{13}\text{C}$  NMR, 126 MHz,  $\text{CD}_3\text{CN}$ , 60 °C

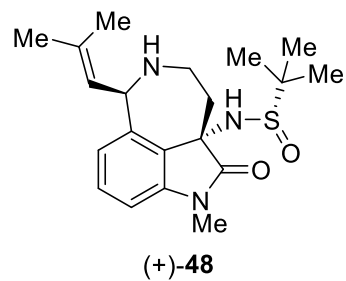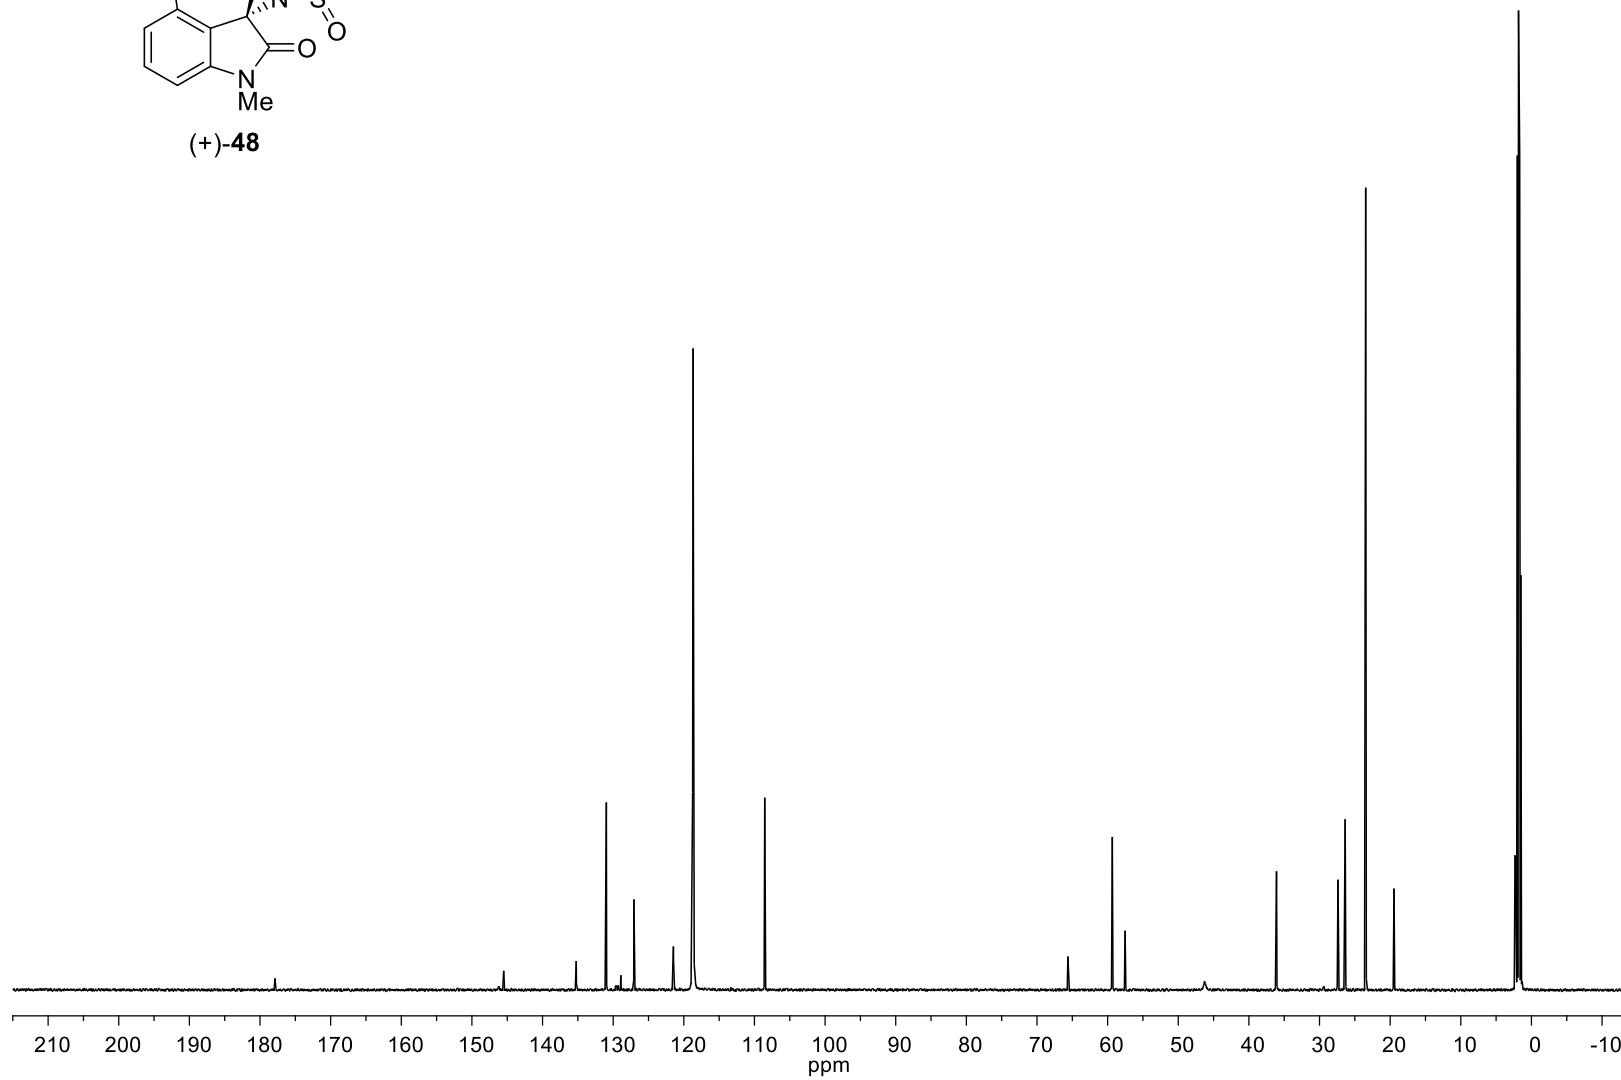

$^1\text{H}$  NMR, 500 MHz,  $\text{CD}_3\text{CN}$ , 70 °C

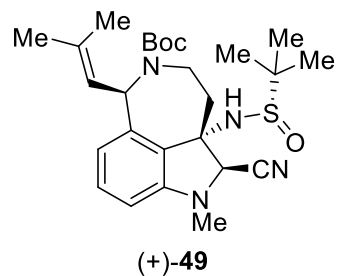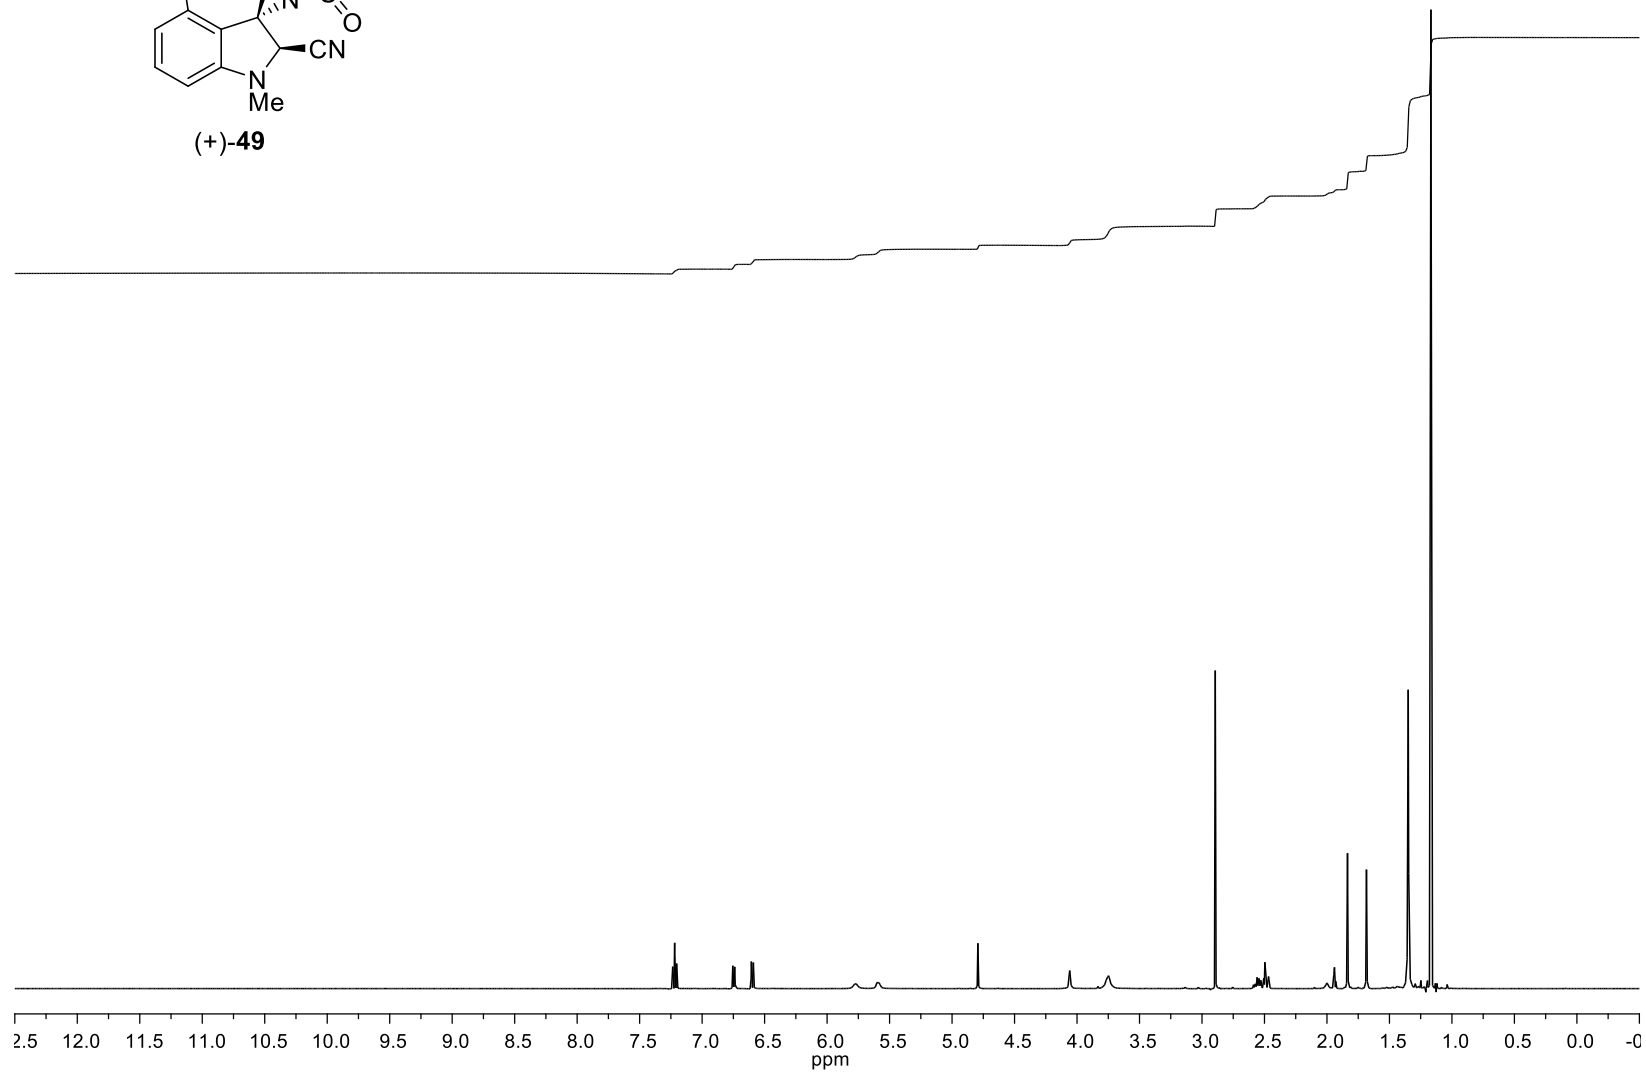

$^{13}\text{C}$  NMR, 126 MHz,  $\text{CD}_3\text{CN}$ , 70 °C

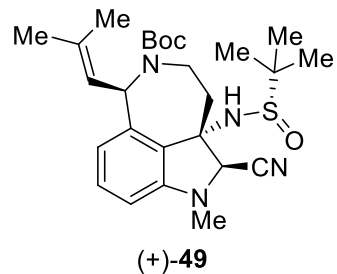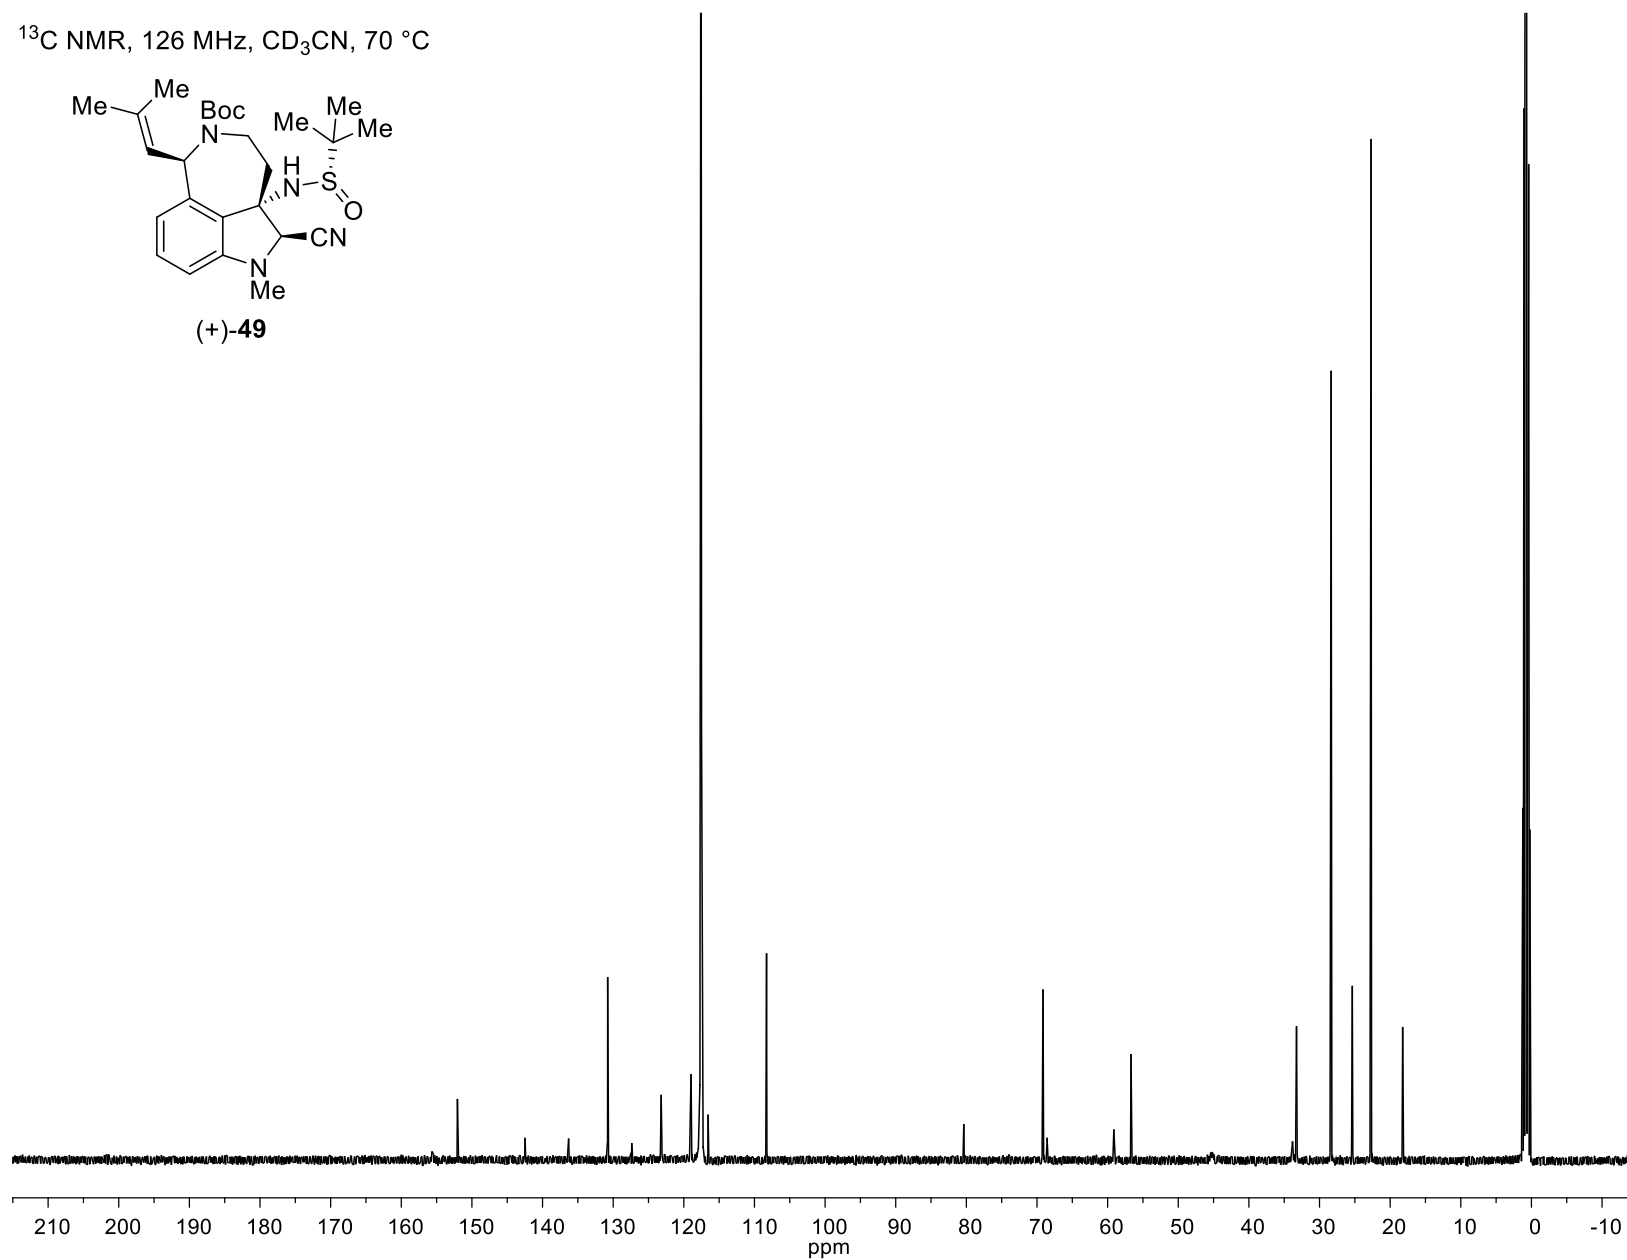

$^1\text{H}$  NMR, 500 MHz,  $\text{C}_6\text{D}_6$ , 20  $^\circ\text{C}$

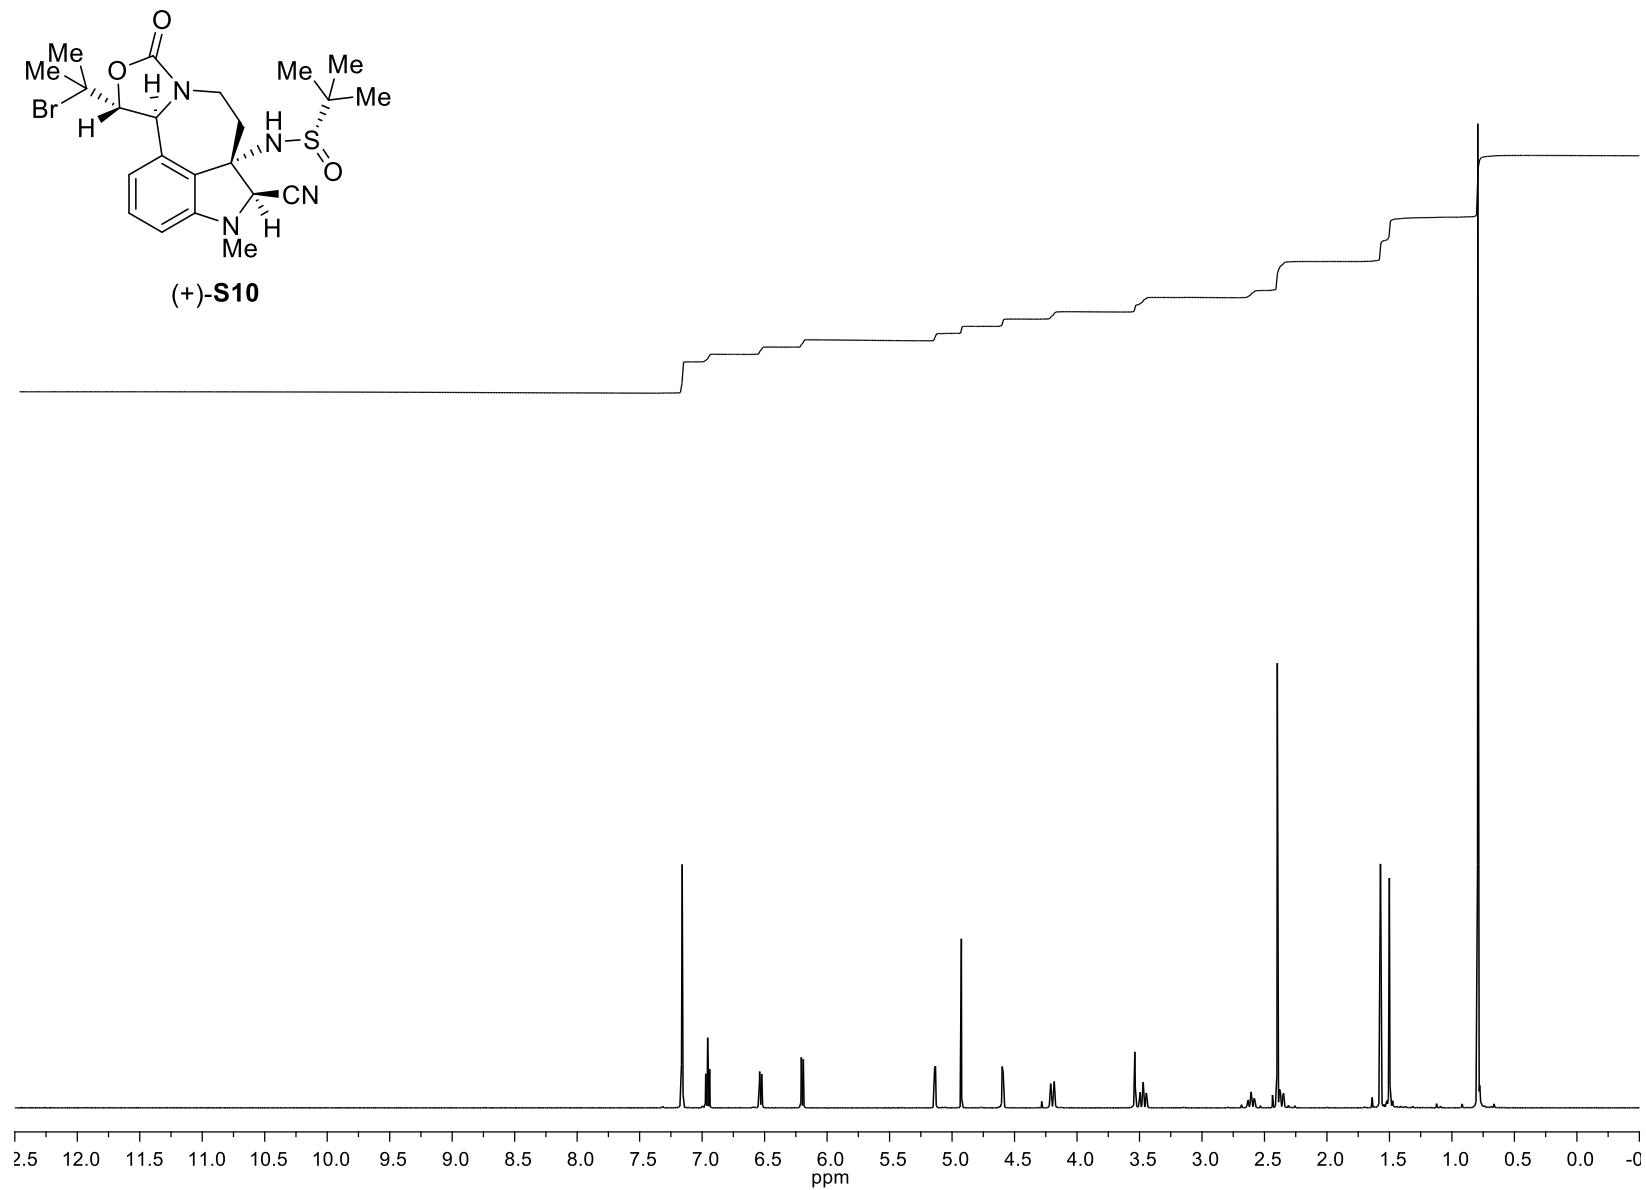

$^{13}\text{C}$  NMR, 126 MHz,  $\text{C}_6\text{D}_6$ , 20 °C

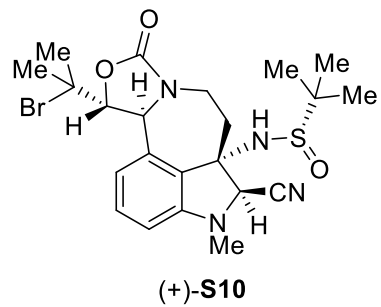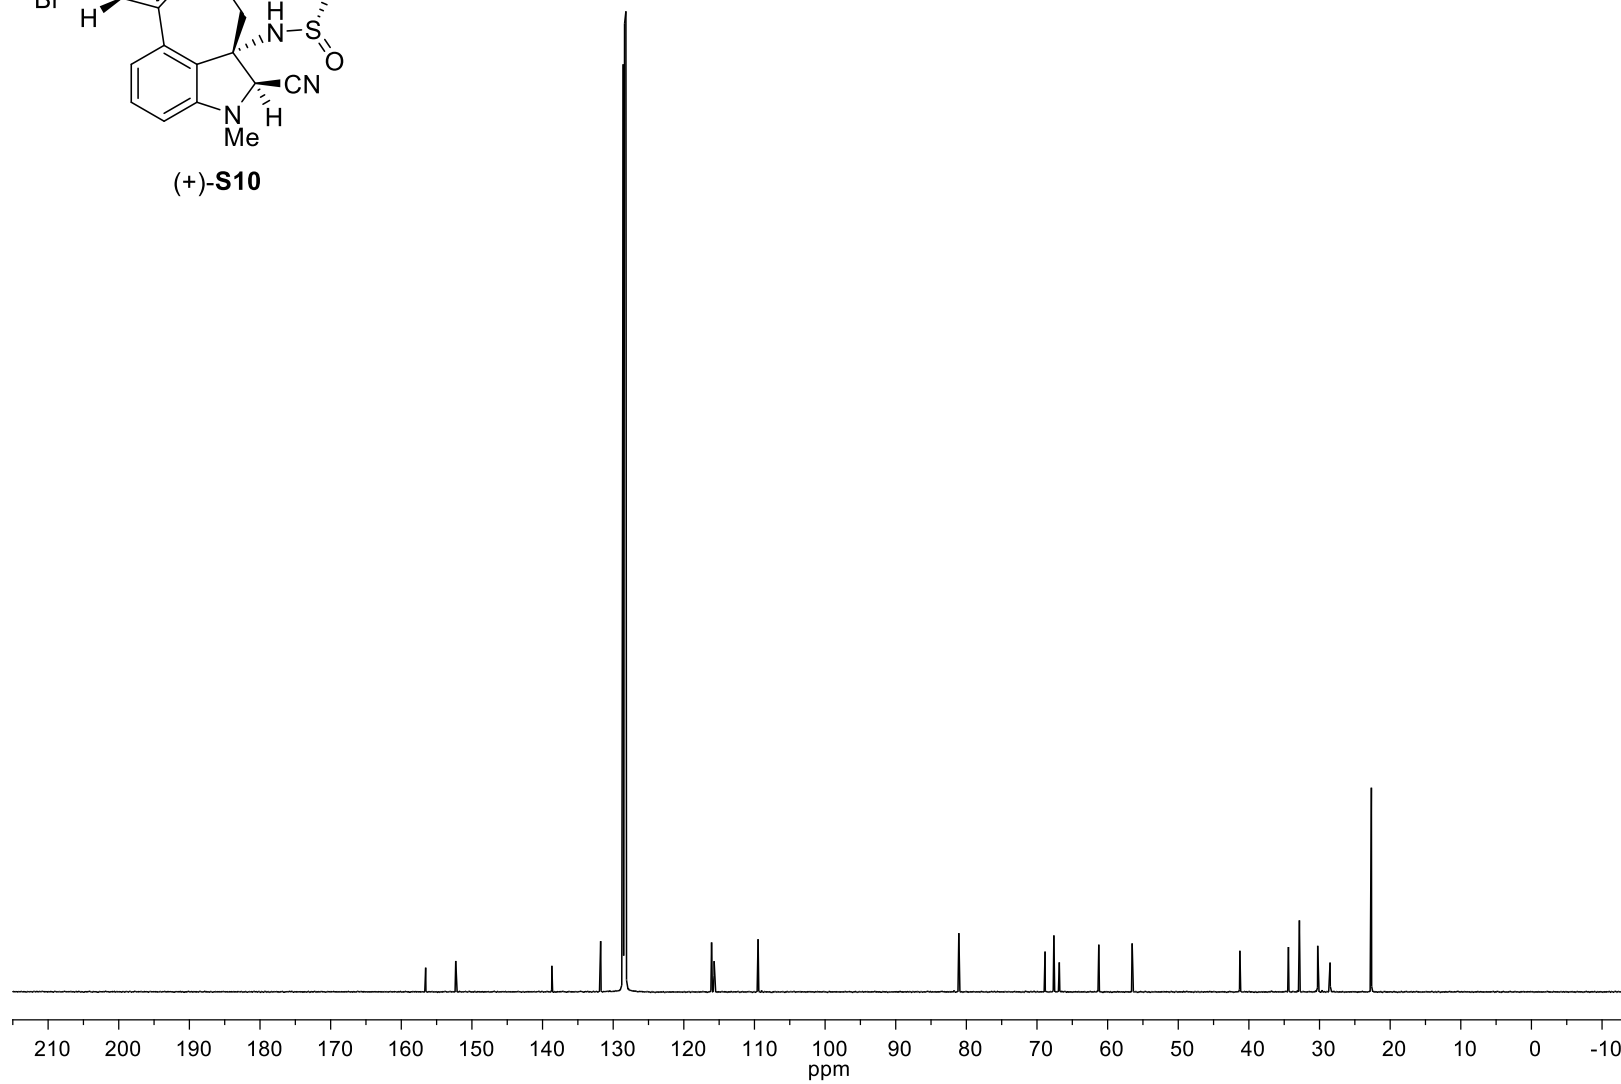

$^1\text{H}$  NMR, 500 MHz,  $\text{C}_6\text{D}_6$ , 70  $^\circ\text{C}$

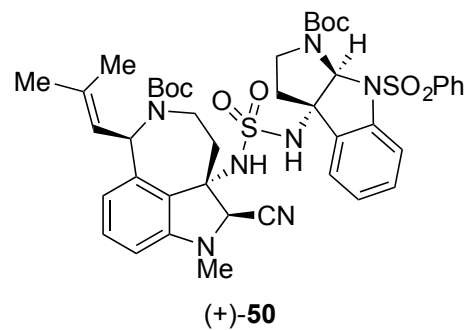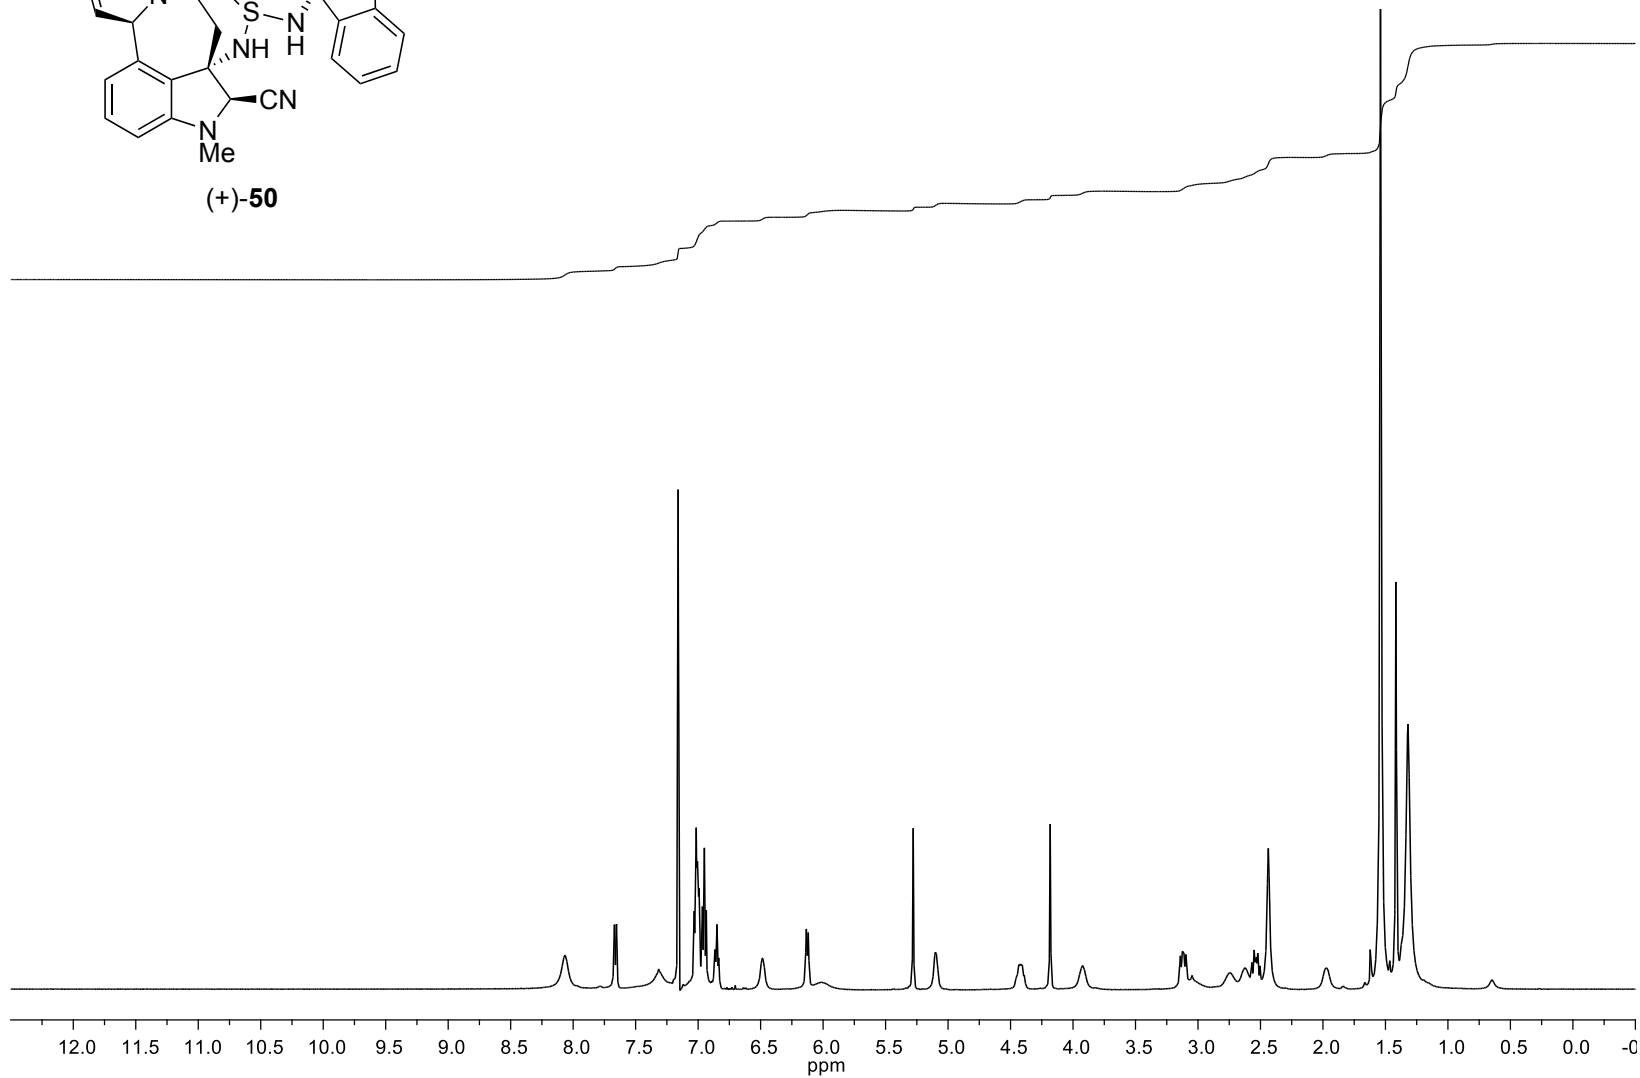

$^{13}\text{C}$  NMR, 100 MHz,  $\text{C}_6\text{D}_6$ , 70 °C

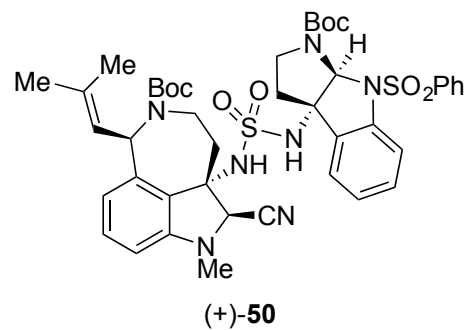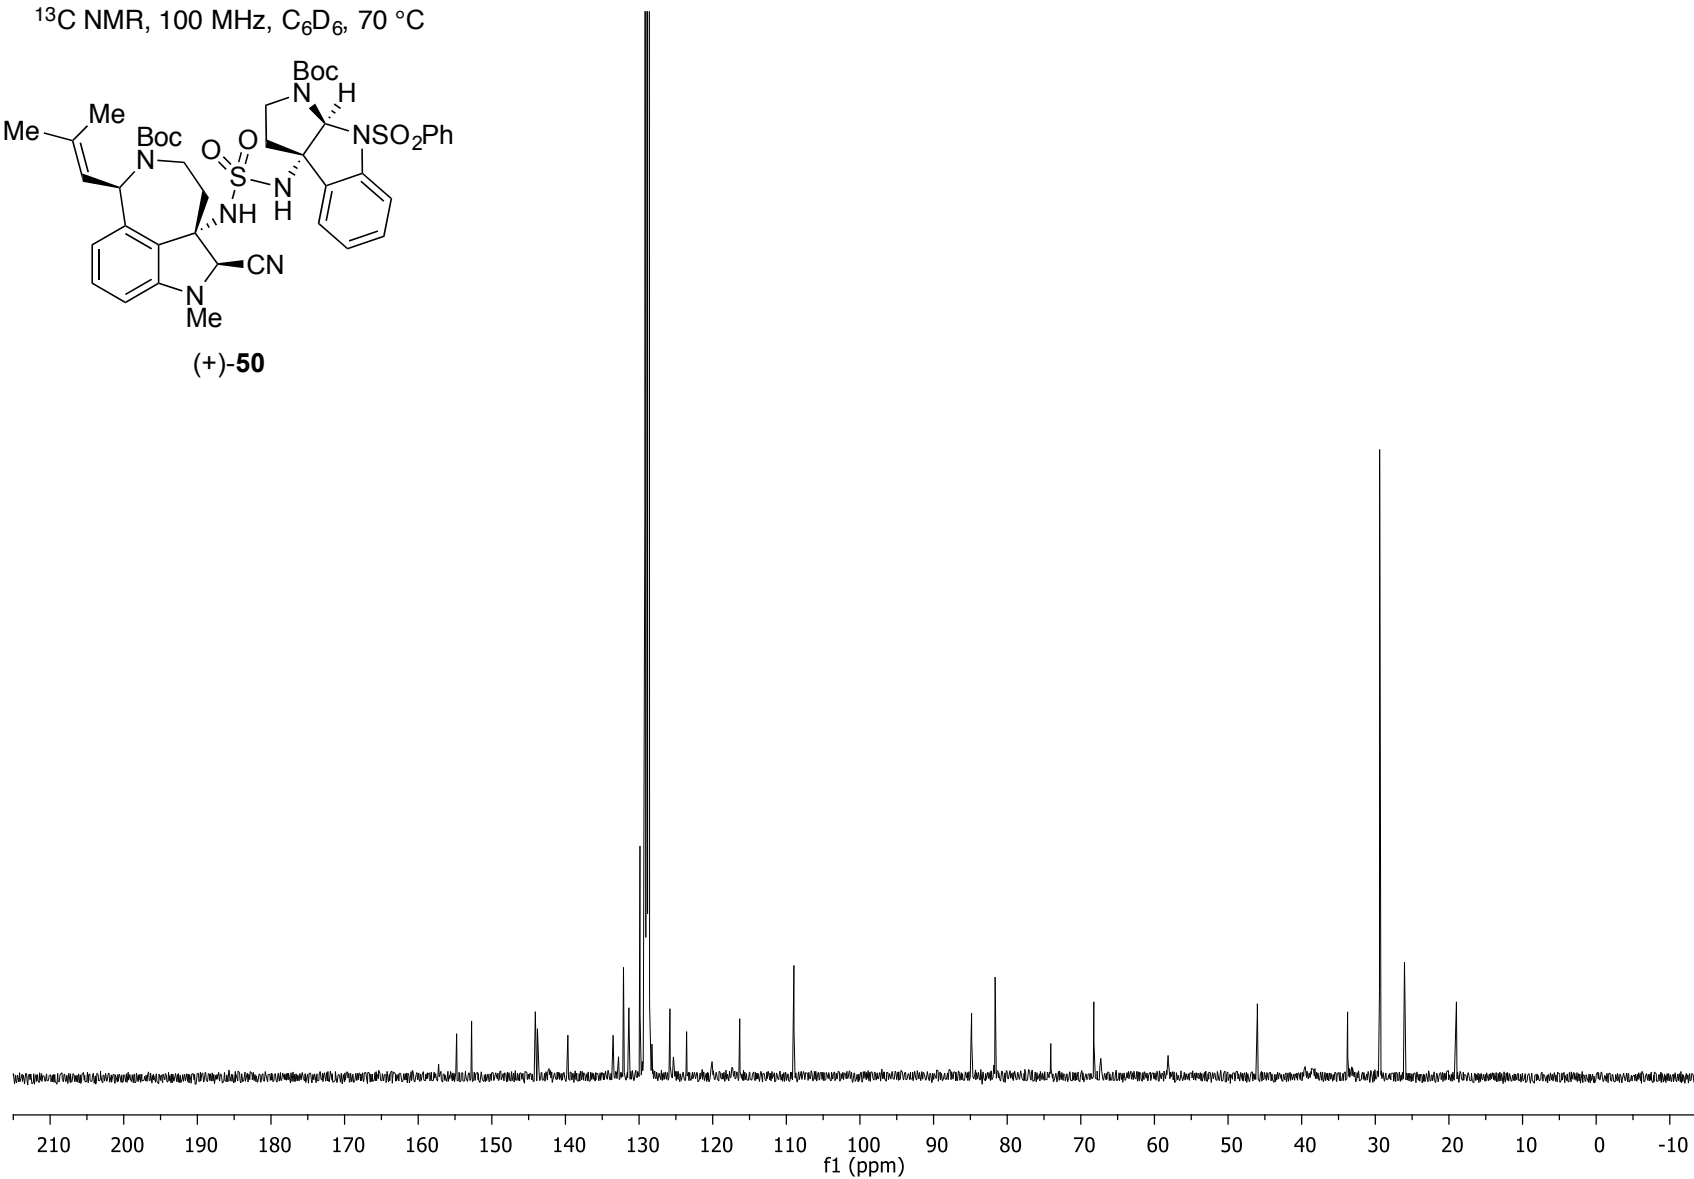



$^1\text{H}$  NMR, 500 MHz,  $\text{CD}_3\text{CN}$ , 70  $^\circ\text{C}$

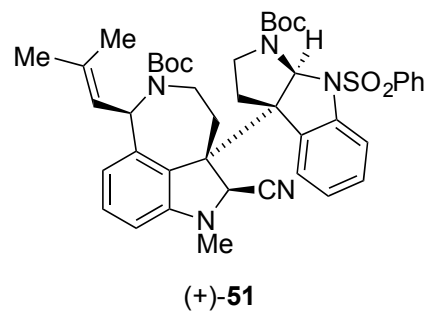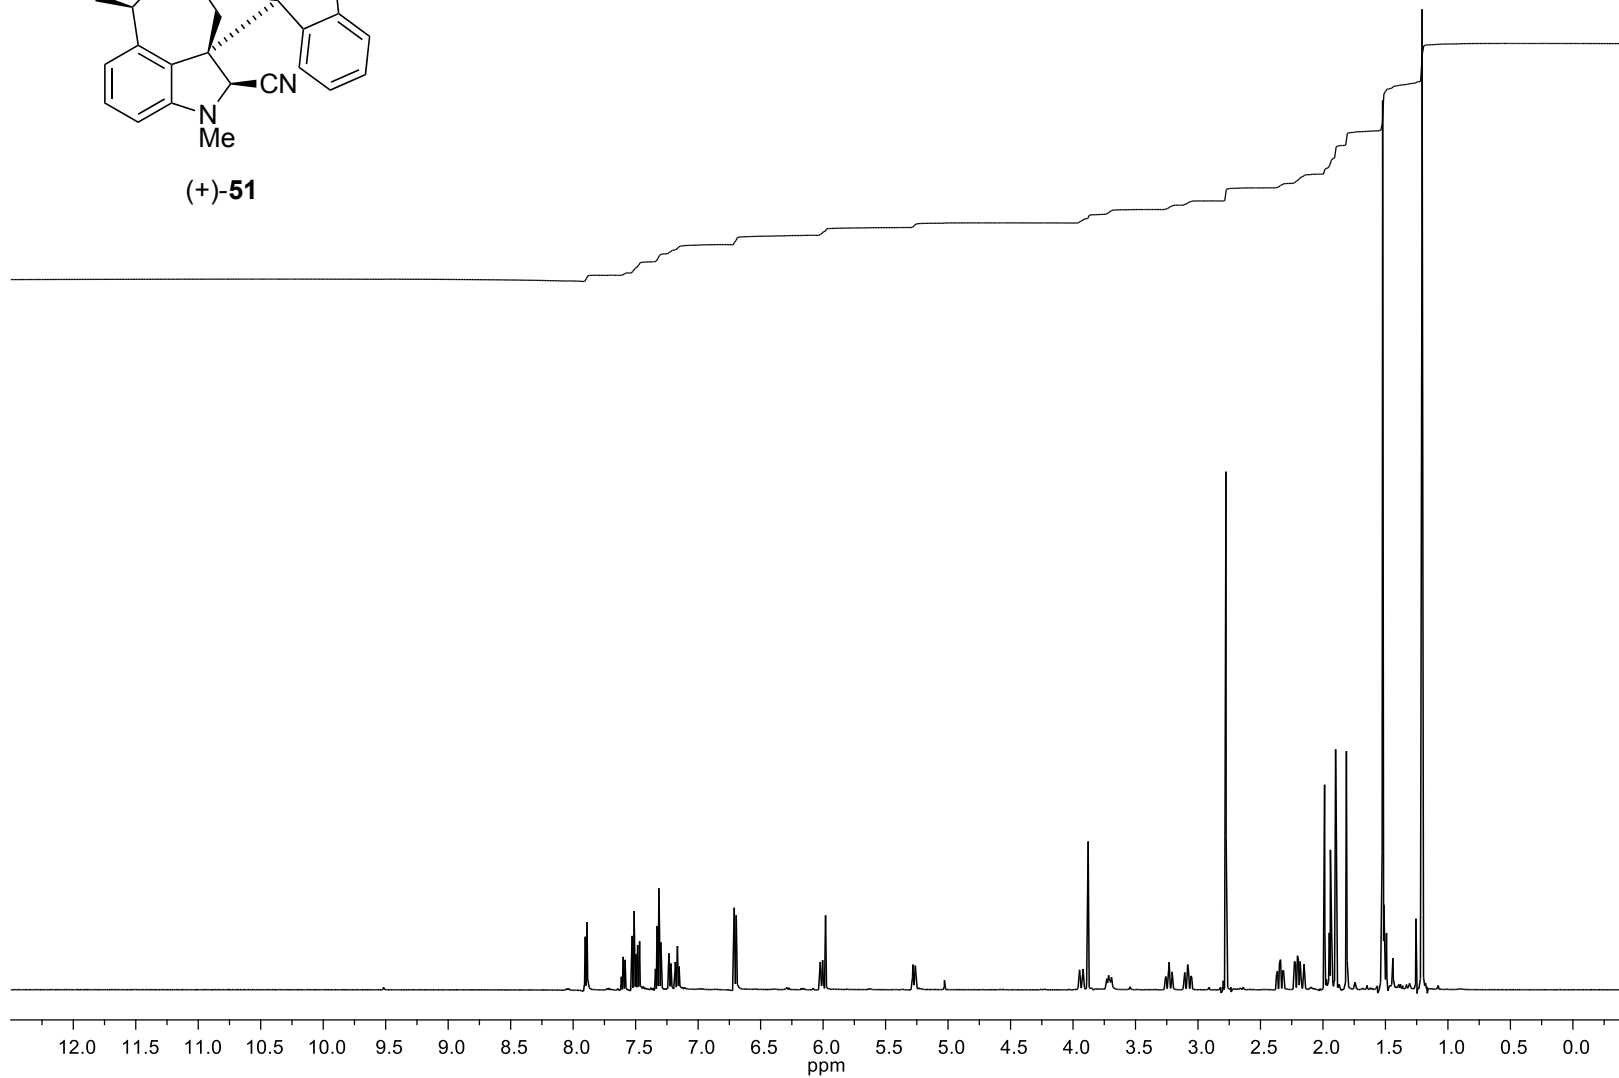

$^{13}\text{C}$  NMR, 126 MHz,  $\text{CD}_3\text{CN}$ , 70 °C

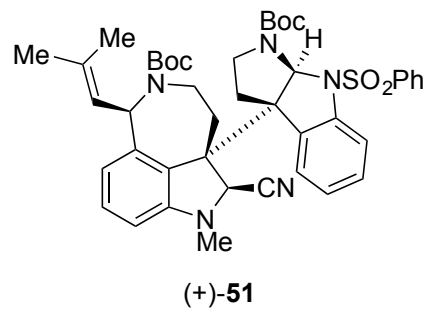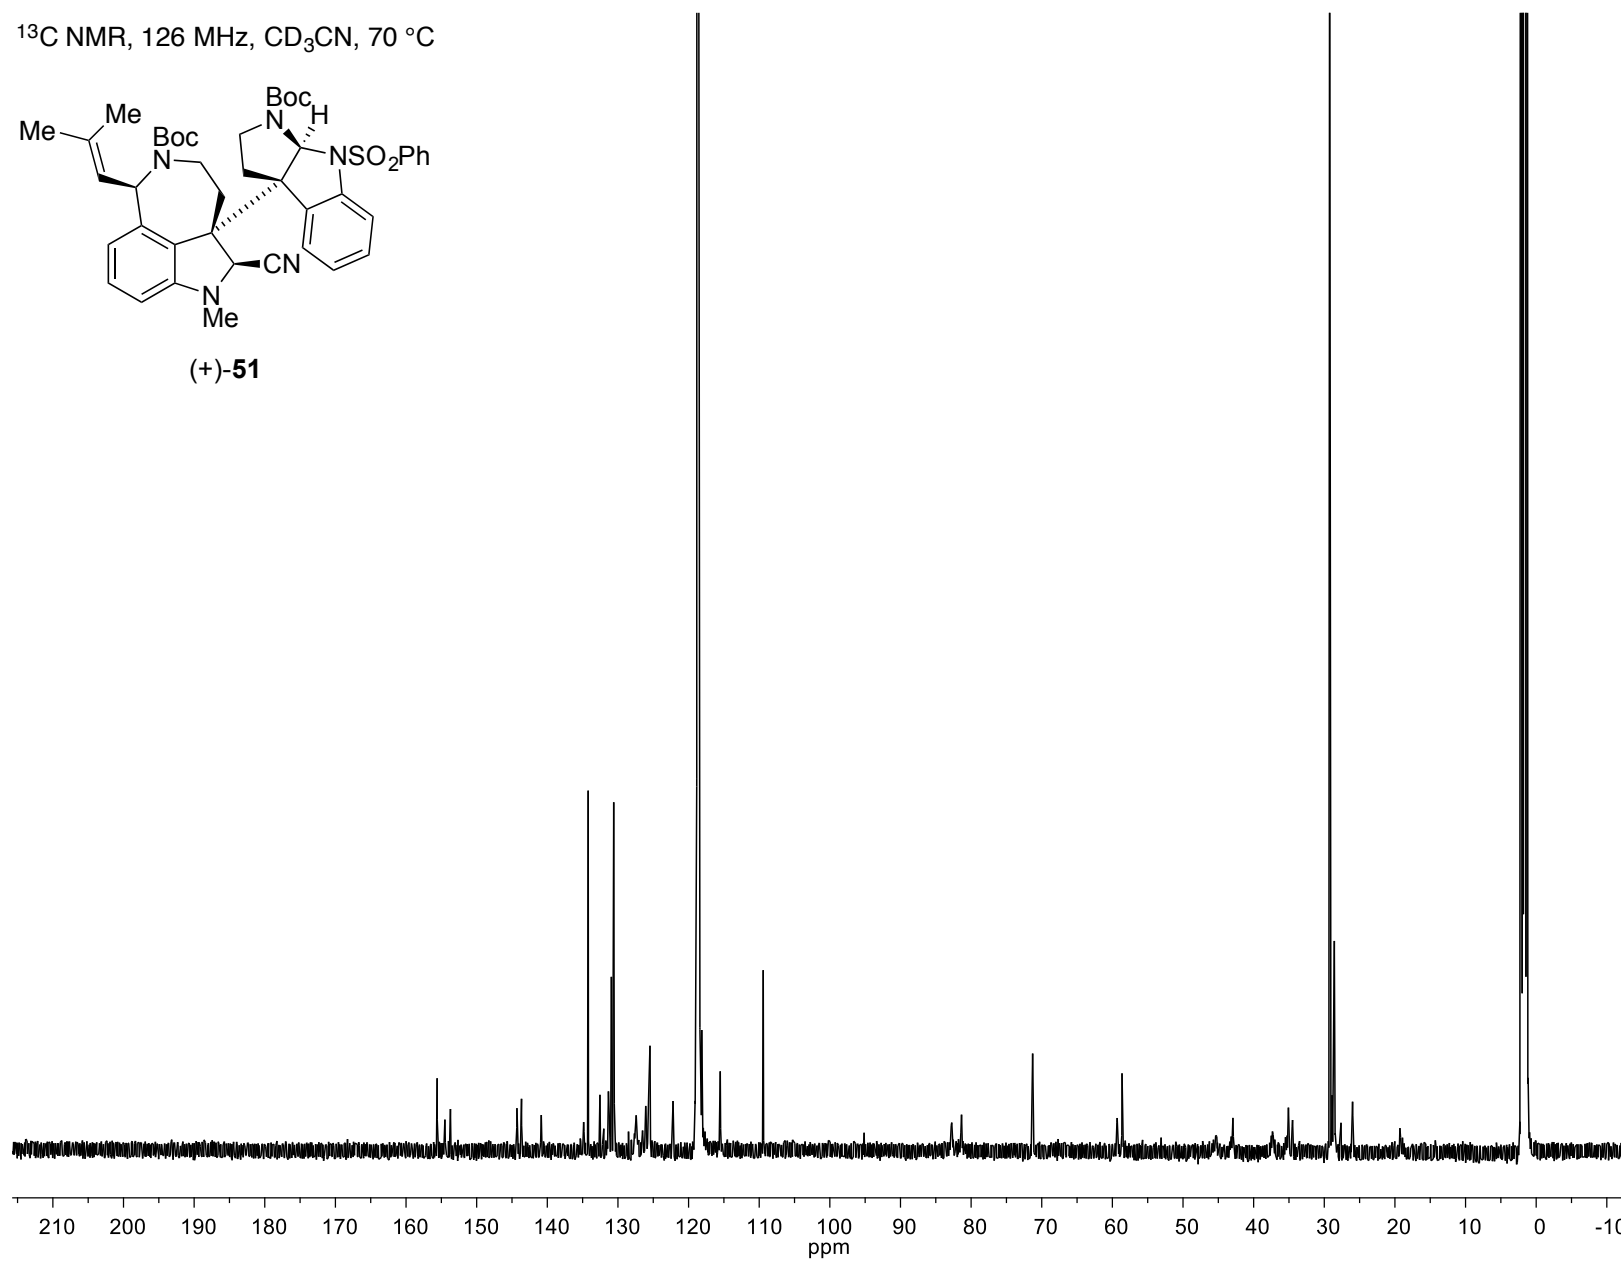

$^1\text{H}$  NMR, 500 MHz,  $\text{CD}_3\text{CN}$ , 20 °C

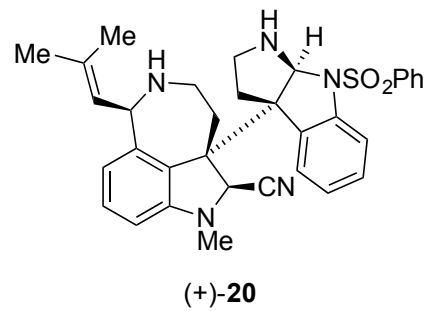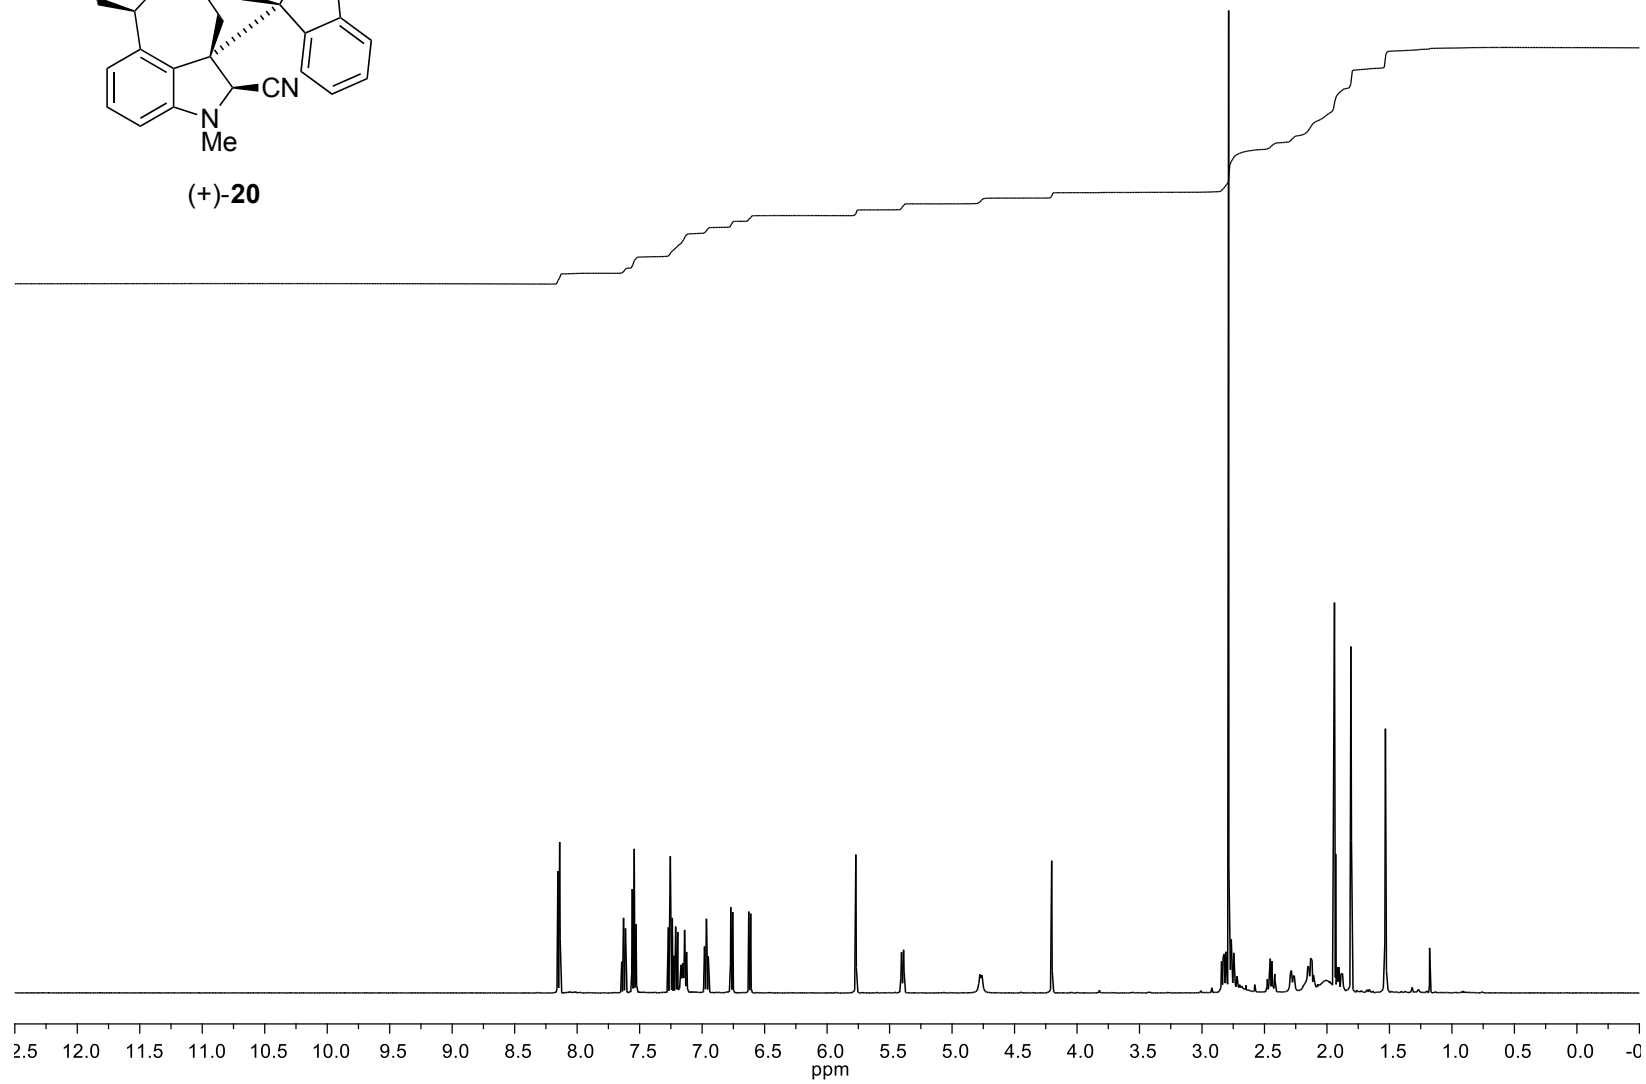

$^{13}\text{C}$  NMR, 126 MHz,  $\text{CD}_3\text{CN}$ , 20 °C

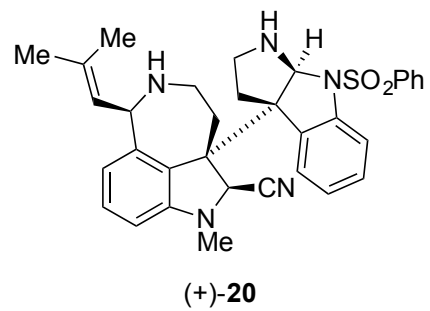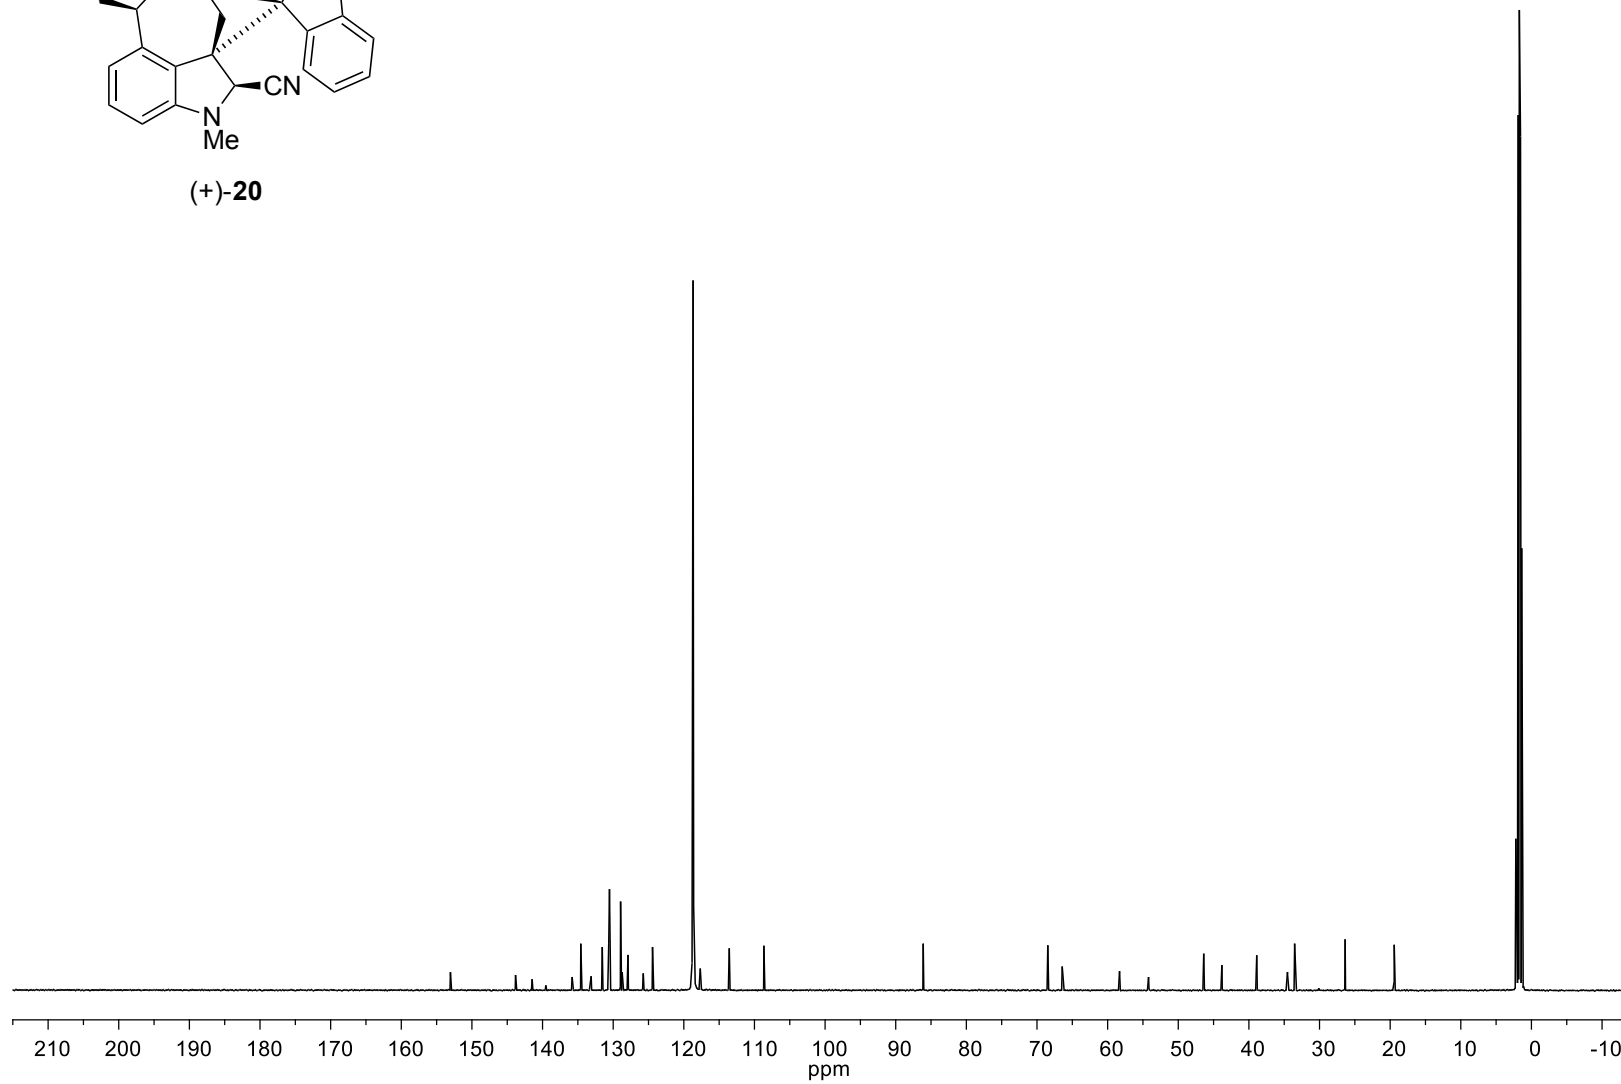

$^1\text{H}$  NMR, 500 MHz,  $\text{CD}_3\text{CN}$ , 20 °C

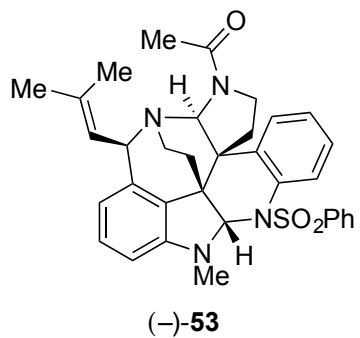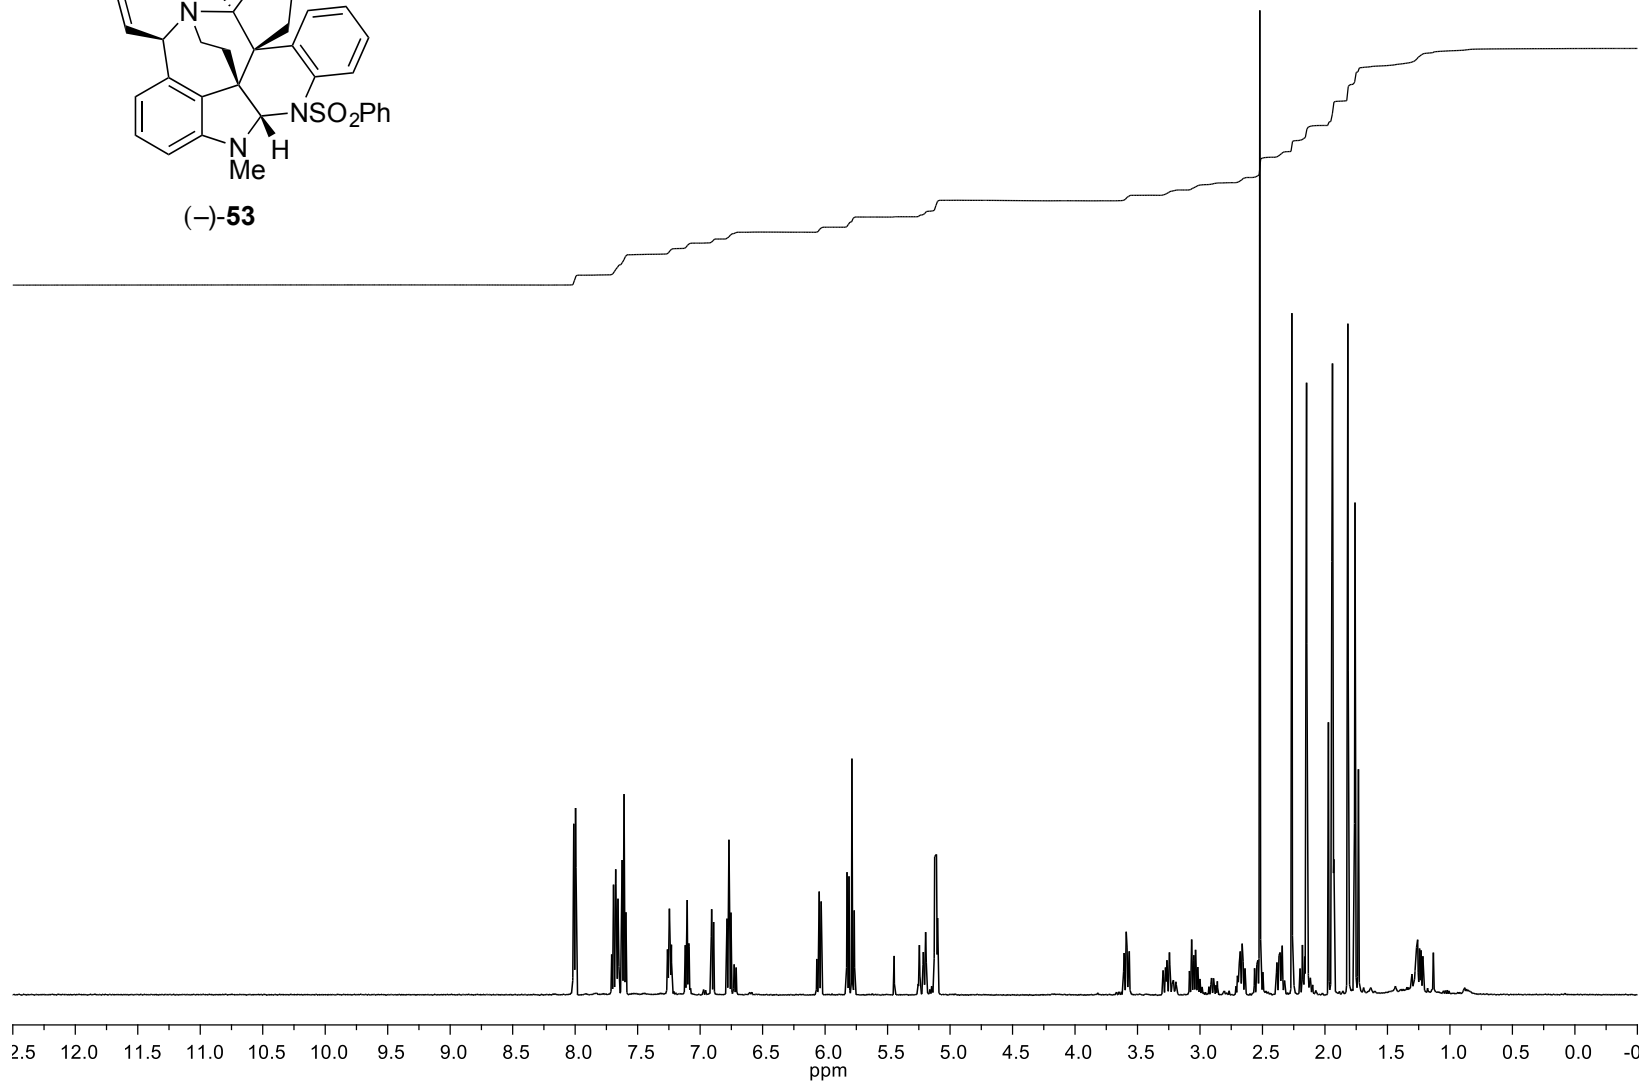

$^{13}\text{C}$  NMR, 126 MHz,  $\text{CD}_3\text{CN}$ , 20 °C

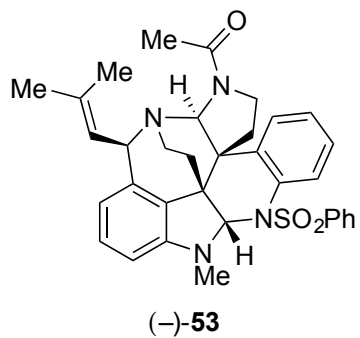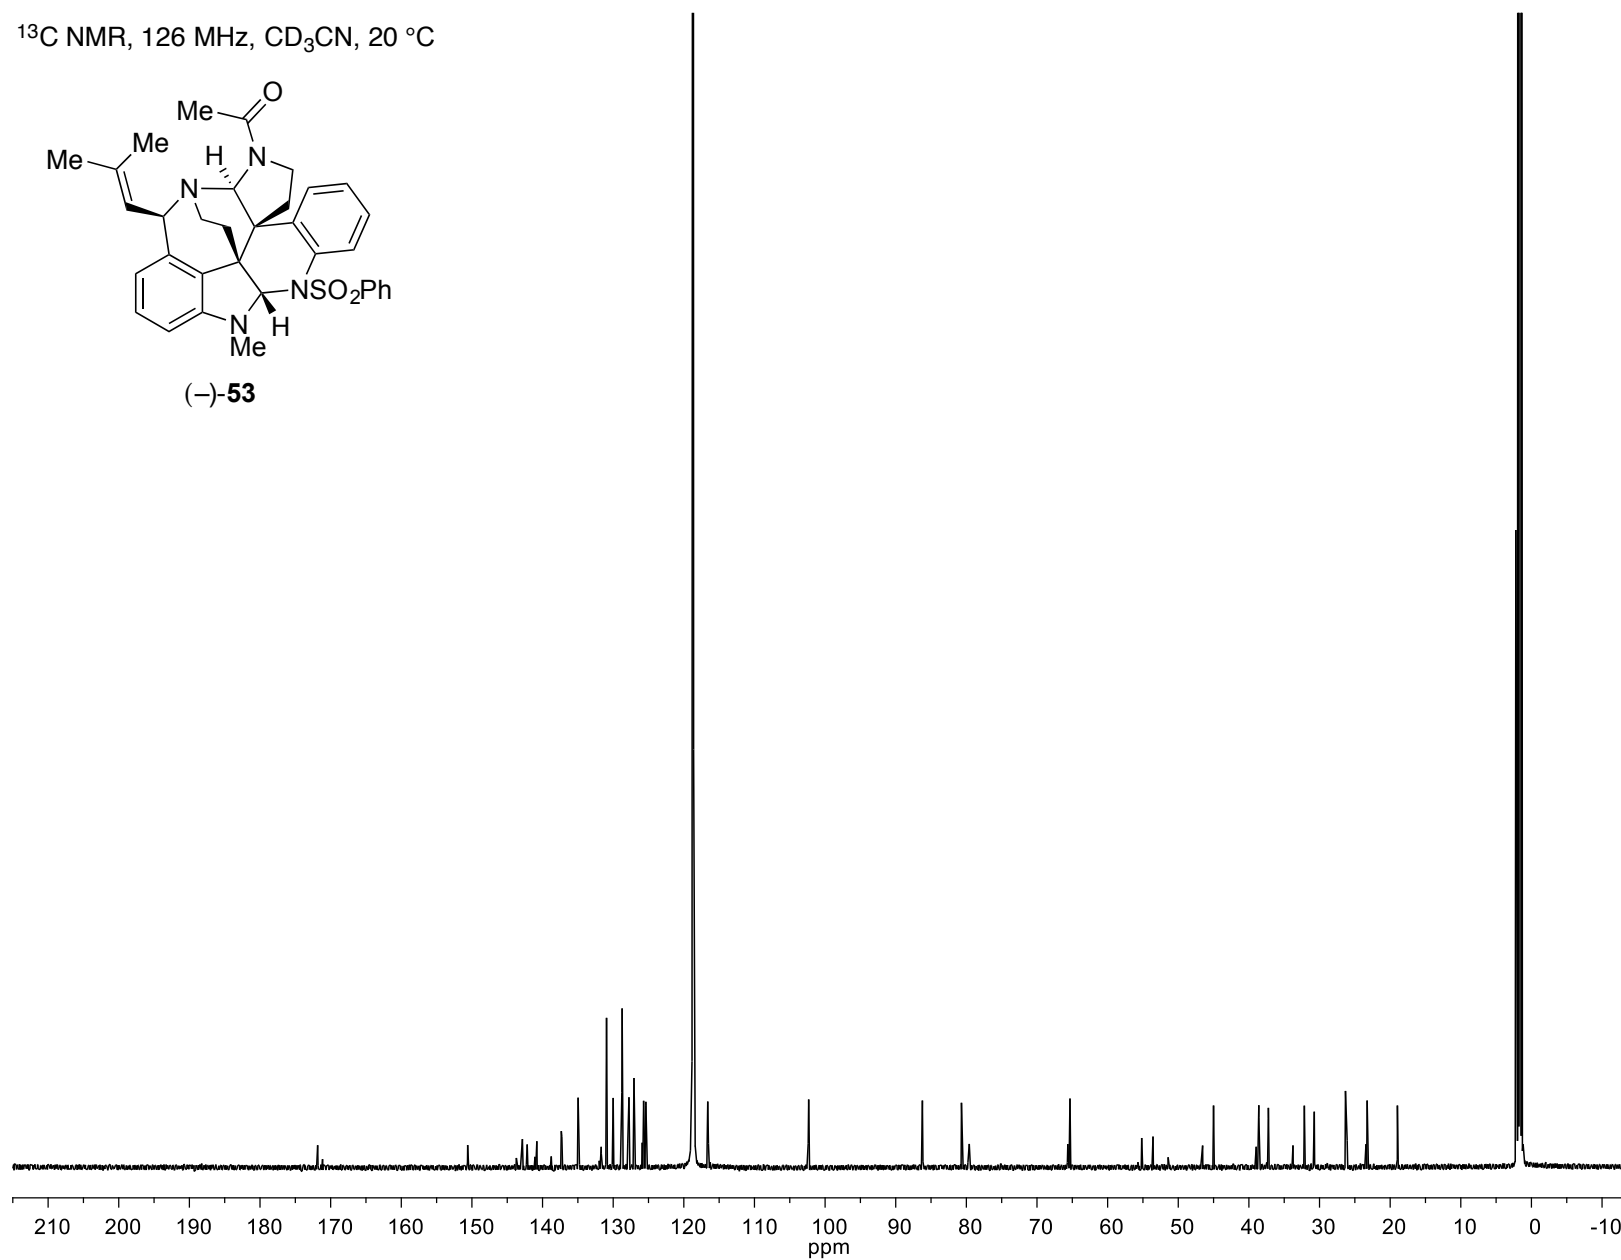

$^1\text{H}$  NMR, 400 MHz,  $\text{CDCl}_3$ , 20  $^\circ\text{C}$

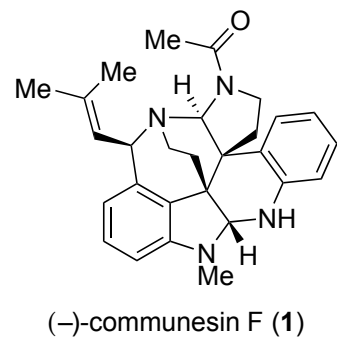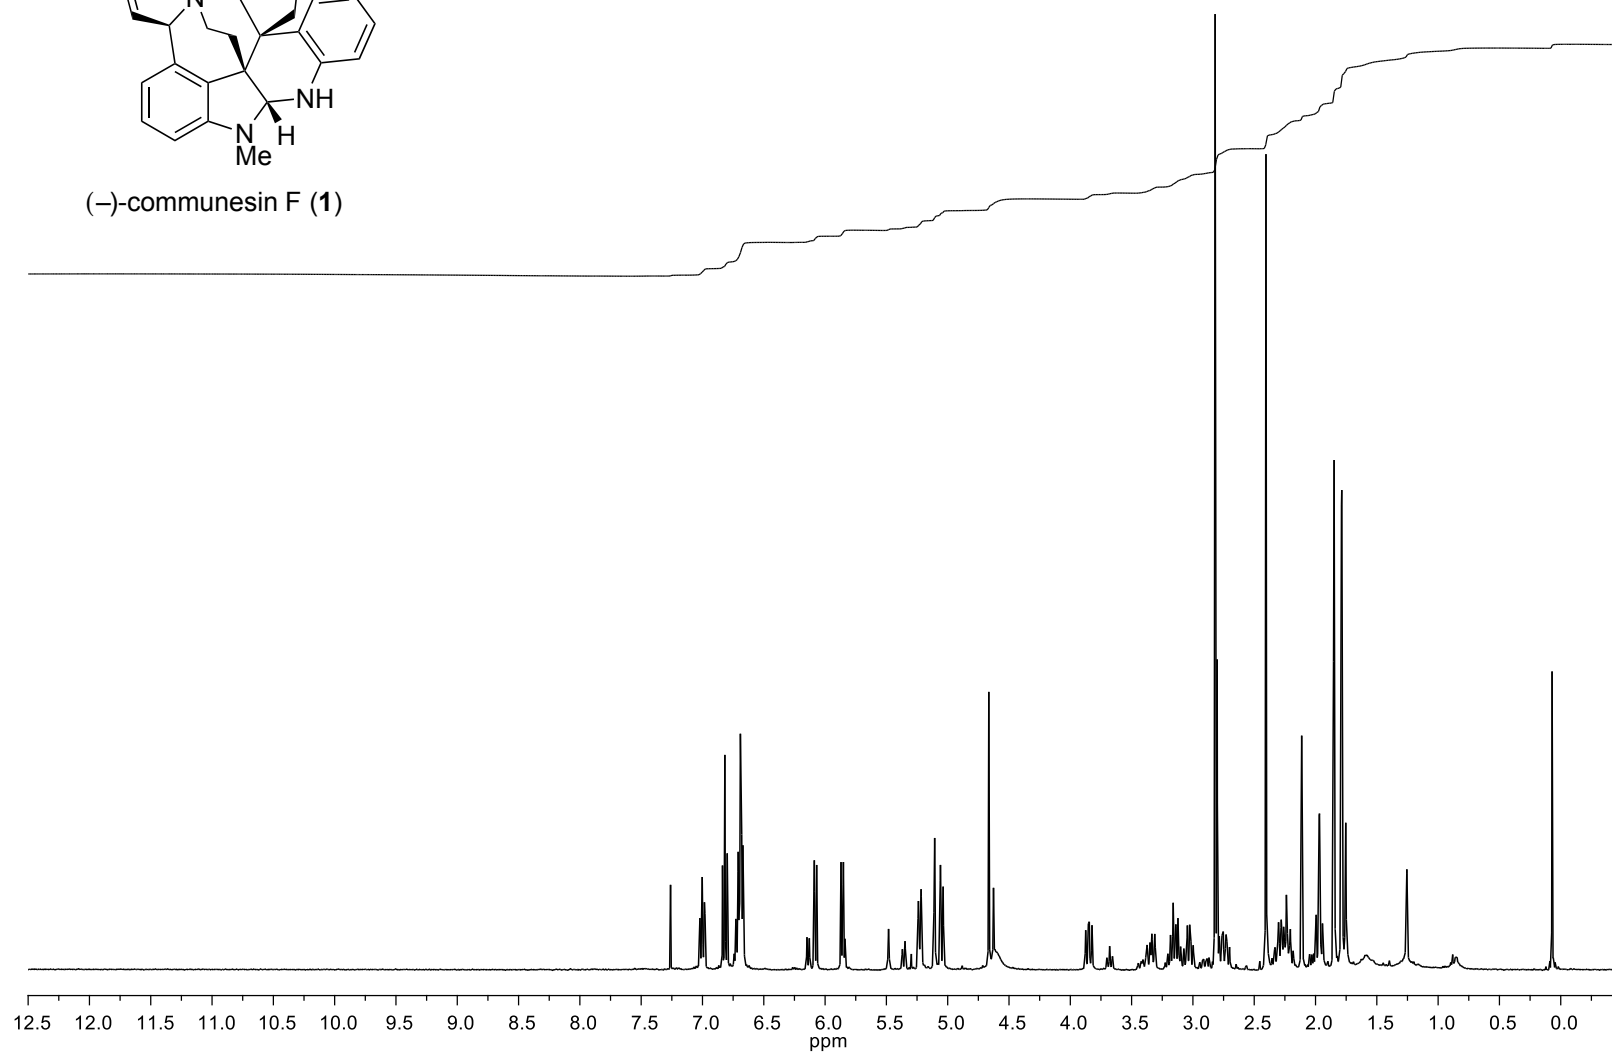

$^{13}\text{C}$  NMR, 126 MHz,  $\text{CDCl}_3$ , 20 °C

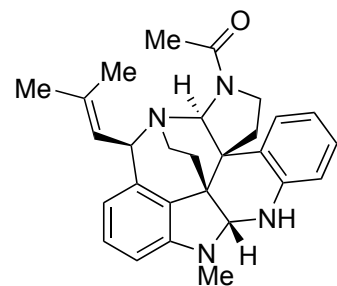

(-)-communesin F (**1**)

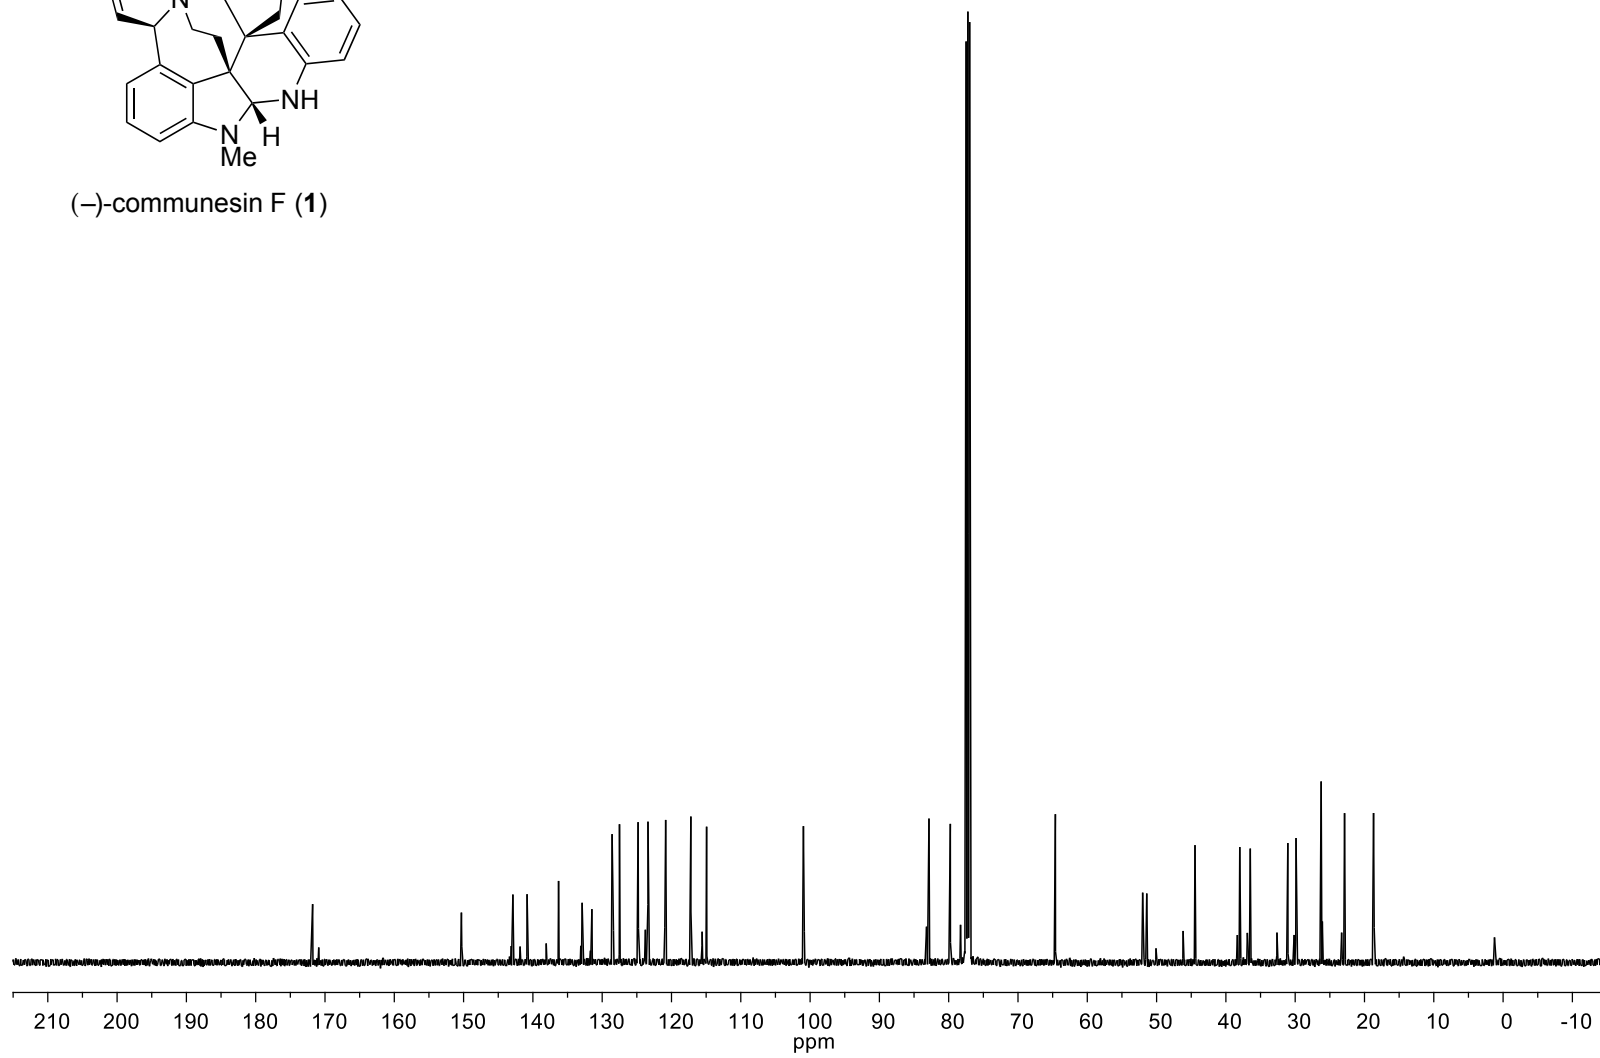

Supplement: NIHMS799589-supplement-Supporting_Info.pdf [file NIHMS799589-supplement-Supporting_Info.pdf]
